# Supplementary material
Source: publisher site journal article supplement (https://www.spandidos-publications.com/677/downloadSupplementary)
Supplement: Supplementary file 1 [file downloadSupplementary]

## Sheet: OXA vs C significant analysis
Optimized OXA VS. Control differentially expressed proteins between groups protein list.
Accession	Description	Coverage	Unique Peptides	Peptides	PSMs	AAs	MW [kDa]	calc. pI	C-1/REF	C-2/REF	C-3/REF	average C	OXA-1/REF	OXA-2/REF	OXA-3/REF	average OXA	OXA/C	t test p value
A0A024R7S3	Clathrin, light polypeptide (Lcb), isoform CRA_c OS=Homo sapiens GN=CLTB PE=4 SV=1 - [A0A024R7S3_HUMAN]	12.32	3	3	9	211	23.1671	4.69092	0.849775	0.918816	0.895878	0.888157	1.09963	1.1029	1.09175	1.09809	1.23637	0.000519186
O43678	NADH dehydrogenase [ubiquinone] 1 alpha subcomplex subunit 2 OS=Homo sapiens GN=NDUFA2 PE=1 SV=3 - [NDUA2_HUMAN]	49.49	5	5	9	99	10.9148	9.56885	0.931306	0.879105	0.882752	0.897721	1.08536	1.12407	1.09598	1.1018	1.22733	0.000561801
B6CGU5	Caspase 8 splice variant OS=Homo sapiens GN=CASP8 PE=2 SV=1 - [B6CGU5_HUMAN]	22.78	7	7	11	395	45.9211	5.03369	0.875705	0.931326	0.945122	0.917385	1.13845	1.10268	1.08921	1.11011	1.21008	0.00171821
B1ALI9	Thioredoxin interacting protein (Fragment) OS=Homo sapiens GN=TXNIP PE=4 SV=1 - [B1ALI9_HUMAN]	8.88	2	2	6	304	33.5961	8.55811	0.858509	0.813364	0.920646	0.864173	1.15714	1.11233	1.0944	1.12129	1.29753	0.00208998
Q6IAM0	Eukaryotic translation initiation factor 3 subunit G OS=Homo sapiens GN=EIF3G PE=2 SV=1 - [Q6IAM0_HUMAN]	27.5	1	8	19	320	35.5789	6.12549	0.915289	0.896022		0.905655	1.11005	1.1154		1.11273	1.22864	0.00232361
F1JVV5	EWSR1/ATF1 fusion protein type 1 OS=Homo sapiens GN=EWSR1/ATF1 fusion PE=2 SV=1 - [F1JVV5_HUMAN]	8.94	3	4	9	537	57.0319	8.57275	0.848718	0.864191	0.83424	0.849049	1.14916	1.06481	1.037	1.08366	1.27632	0.00252676
Q9Y6A5	Transforming acidic coiled-coil-containing protein 3 OS=Homo sapiens GN=TACC3 PE=1 SV=1 - [TACC3_HUMAN]	7.16	4	4	5	838	90.3038	5.04639	0.941011	0.924373		0.932692	1.15803	1.14174		1.14988	1.23287	0.00286207
A6NLH6	Protein cornichon homolog 4 OS=Homo sapiens GN=CNIH4 PE=1 SV=1 - [A6NLH6_HUMAN]	14.6	1	1	6	137	15.7599	6.96143	0.88842	0.886123	0.828951	0.867831	1.15387	1.03706	1.1308	1.10724	1.27587	0.00416309
D6RIZ4	Major facilitator superfamily domain-containing protein 10 OS=Homo sapiens GN=MFSD10 PE=1 SV=1 - [D6RIZ4_HUMAN]	3.65	1	1	4	356	38.2232	9.72998	0.875362	0.892653		0.884008	1.09173	1.12262		1.10718	1.25245	0.00623122
H0YNP9	Guanosine-3',5'-bis(diphosphate) 3'-pyrophosphohydrolase MESH1 OS=Homo sapiens GN=HDDC3 PE=1 SV=1 - [H0YNP9_HUMAN]	11.19	1	1	3	143	15.9464	6.29053	0.860643	0.902971	0.793756	0.852456	1.16134	1.07888	1.03185	1.09069	1.27947	0.00852267
Q6QN92	Mitochondrial glycine cleavage system H-protein (Fragment) OS=Homo sapiens PE=2 SV=1 - [Q6QN92_HUMAN]	8	1	1	7	125	13.8047	4.33545	0.829217	0.857273	0.805661	0.830717	1.06486	0.997022	0.946594	1.00282	1.20718	0.00998884
P07311	Acylphosphatase-1 OS=Homo sapiens GN=ACYP1 PE=1 SV=2 - [ACYP1_HUMAN]	30.3	3	3	11	99	11.2539	9.30518	0.810175	0.869743	0.89771	0.85921	1.1602	1.10401	1.0012	1.08847	1.26683	0.0125751
K7EQL1	Protein FAM98C (Fragment) OS=Homo sapiens GN=FAM98C PE=1 SV=1 - [K7EQL1_HUMAN]	8.29	1	1	2	181	18.1834	8.52881	0.956237		0.933897	0.945067	1.13506		1.17929	1.15718	1.22444	0.013373
A0A140VJE0	Testicular tissue protein Li 14 OS=Homo sapiens PE=2 SV=1 - [A0A140VJE0_HUMAN]	4.35	2	2	6	345	38.6786	6.68311	0.931274	0.870557	0.780919	0.860917	1.06421	1.02699	1.03501	1.04207	1.21042	0.0159204
O00458	Interferon-related developmental regulator 1 OS=Homo sapiens GN=IFRD1 PE=1 SV=4 - [IFRD1_HUMAN]	9.09	2	2	5	451	50.2364	7.18115	0.861496	0.785044	0.979104	0.875214	1.25207	1.1442	1.08113	1.15913	1.3244	0.0196305
B5BU78	Protein tyrosine phosphatase type IVA protein 1 OS=Homo sapiens GN=PTP4A1 PE=2 SV=1 - [B5BU78_HUMAN]	43.93	3	6	20	173	19.7742	8.96826	0.993085	1.02099	0.746728	0.920266	1.31848	1.19129	1.34597	1.28525	1.3966	0.021298
B0AZV9	Trafficking protein particle complex 6B, isoform CRA_a OS=Homo sapiens GN=TRAPPC6B PE=2 SV=1 - [B0AZV9_HUMAN]	8.51	1	1	3	94	10.7286	9.67139	0.778078	0.875073	1.00381	0.885653	1.36451	1.10871	1.22586	1.23303	1.39222	0.0244552
P82914	28S ribosomal protein S15, mitochondrial OS=Homo sapiens GN=MRPS15 PE=1 SV=1 - [RT15_HUMAN]	17.12	4	5	5	257	29.8234	10.4771	0.861944		0.812207	0.837076	1.08608		1.02912	1.0576	1.26345	0.0281625
Q9UJC5	SH3 domain-binding glutamic acid-rich-like protein 2 OS=Homo sapiens GN=SH3BGRL2 PE=1 SV=2 - [SH3L2_HUMAN]	24.3	2	2	4	107	12.3182	6.7124	0.891441	0.809242	0.865905	0.855529	1.08388	1.16126	0.957467	1.06754	1.24781	0.029825
Q86U90	YrdC domain-containing protein, mitochondrial OS=Homo sapiens GN=YRDC PE=1 SV=1 - [YRDC_HUMAN]	20.79	4	4	5	279	29.3093	8.57275	0.813344		0.762831	0.788087	1.26262		1.12682	1.19472	1.51597	0.0303057
P17096	High mobility group protein HMG-I/HMG-Y OS=Homo sapiens GN=HMGA1 PE=1 SV=3 - [HMGA1_HUMAN]	38.32	2	5	27	107	11.6691	10.3159	1.05818	0.955766	0.897284	0.970409	1.08774	1.23072	1.18275	1.16707	1.20266	0.0355648
Q92604	Acyl-CoA:lysophosphatidylglycerol acyltransferase 1 OS=Homo sapiens GN=LPGAT1 PE=1 SV=1 - [LGAT1_HUMAN]	10.27	3	3	6	370	43.0613	8.92432	0.741816	0.95824	0.924558	0.874871	1.20901	1.0508	1.12337	1.12773	1.28902	0.035879
A0A097PY54	ATP synthase subunit a OS=Homo sapiens GN=ATP6 PE=4 SV=1 - [A0A097PY54_HUMAN]	20.8	2	2	4	226	24.7397	10.0962	0.877511	0.907663		0.892587	1.11267	1.04376		1.07821	1.20797	0.0386838
O75911	Short-chain dehydrogenase/reductase 3 OS=Homo sapiens GN=DHRS3 PE=1 SV=2 - [DHRS3_HUMAN]	4.97	1	1	4	302	33.5266	8.83643	0.913064	1.01618	1.06813	0.999124	1.16898	1.1477	1.33151	1.21606	1.21713	0.0424084
Q5JR08	Rho-related GTP-binding protein RhoC (Fragment) OS=Homo sapiens GN=RHOC PE=1 SV=8 - [Q5JR08_HUMAN]	33.51	1	6	45	188	21.509	6.58057	0.965704	0.815039	0.928183	0.902976	1.07789	1.18007	1.02197	1.09331	1.21079	0.0424132
Q03169	Tumor necrosis factor alpha-induced protein 2 OS=Homo sapiens GN=TNFAIP2 PE=2 SV=2 - [TNAP2_HUMAN]	5.05	2	2	3	654	72.6161	6.45557	0.923311	0.974125		0.948718	1.10877	1.17497		1.14187	1.20359	0.043636
P53609	Geranylgeranyl transferase type-1 subunit beta OS=Homo sapiens GN=PGGT1B PE=1 SV=2 - [PGTB1_HUMAN]	2.39	1	1	2	377	42.3408	6.82959	0.852682		0.883506	0.868094	1.1679		1.06414	1.11602	1.2856	0.0444932
A0A024R2W4	Dystroglycan 1 (Dystrophin-associated glycoprotein 1), isoform CRA_a OS=Homo sapiens GN=DAG1 PE=4 SV=1 - [A0A024R2W4_HUMAN]	8.38	5	5	8	895	97.4797	8.55811	1.09362	1.14047	1.1204	1.11816	0.87909	0.831607	0.862914	0.85787	0.767213	0.000180329
A0A024R8K7	Integrin beta OS=Homo sapiens GN=ITGB4 PE=3 SV=1 - [A0A024R8K7_HUMAN]	36.87	56	56	205	1752	194.889	6.1001	1.05446	1.11693	1.10092	1.09077	0.855206	0.867383	0.869239	0.863942	0.792047	0.000296383
B4DND9	cDNA FLJ58318, highly similar to Glioma tumor suppressor candidate region gene 2 protein OS=Homo sapiens PE=2 SV=1 - [B4DND9_HUMAN]	8.45	3	3	6	426	48.1688	9.979	1.26507	1.22402	1.21594	1.23501	0.616229	0.717265	0.808253	0.713916	0.578064	0.000821973
Q9NY93	Probable ATP-dependent RNA helicase DDX56 OS=Homo sapiens GN=DDX56 PE=1 SV=1 - [DDX56_HUMAN]	21.94	11	11	23	547	61.551	9.26123	1.17492	1.32	1.13706	1.21066	0.703599	0.694253	0.744583	0.714145	0.589882	0.00101252
P84101	Small EDRK-rich factor 2 OS=Homo sapiens GN=SERF2 PE=1 SV=1 - [SERF2_HUMAN]	30.51	2	2	9	59	6.89564	10.4478	1.12133	1.09943	1.04986	1.09021	0.846817	0.85324	0.902662	0.867573	0.795788	0.00127137
P62269	40S ribosomal protein S18 OS=Homo sapiens GN=RPS18 PE=1 SV=3 - [RS18_HUMAN]	53.29	11	11	67	152	17.7079	10.9897	1.08041	1.05959	1.0743	1.07143	0.856094	0.862387	0.94085	0.886444	0.827345	0.00270421
A0A0S2Z5K6	SIL1-like protein endoplasmic reticulum chaperone isoform 2 (Fragment) OS=Homo sapiens GN=SIL1 PE=2 SV=1 - [A0A0S2Z5K6_HUMAN]	11.34	4	4	7	397	44.4851	5.43994	1.09444	1.18205	1.11287	1.12978	0.886457	0.757458	0.834604	0.826173	0.731267	0.00272952
Q8N5I2	Arrestin domain-containing protein 1 OS=Homo sapiens GN=ARRDC1 PE=1 SV=1 - [ARRD1_HUMAN]	13.63	5	5	10	433	45.9527	7.02002	1.10447	1.09551	1.25532	1.15176	0.786496	0.834445	0.791697	0.804213	0.698245	0.00300204
Q9H9Y2	Ribosome production factor 1 OS=Homo sapiens GN=RPF1 PE=1 SV=2 - [RPF1_HUMAN]	12.03	4	4	6	349	40.0861	10.0083	1.10148	1.20013	1.20235	1.16799	0.779588	0.919902	0.83024	0.843244	0.721962	0.00354783
O95478	Ribosome biogenesis protein NSA2 homolog OS=Homo sapiens GN=NSA2 PE=1 SV=1 - [NSA2_HUMAN]	11.92	3	3	8	260	30.0465	10.272	1.12422	1.23429	1.33598	1.2315	0.776241	0.714385	0.858554	0.78306	0.635861	0.00375153
A0A024R8I8	Chromosome 9 open reading frame 140, isoform CRA_a OS=Homo sapiens GN=C9orf140 PE=4 SV=1 - [A0A024R8I8_HUMAN]	8.88	3	3	5	394	42.541	8.66064	1.11276	1.14886		1.13081	0.819067	0.801631		0.810349	0.716609	0.00388913
Q8IY37	Probable ATP-dependent RNA helicase DHX37 OS=Homo sapiens GN=DHX37 PE=1 SV=1 - [DHX37_HUMAN]	6.48	7	7	11	1157	129.464	8.104	1.15511	1.07274	1.18035	1.13607	0.762125	0.881381	0.87693	0.840145	0.739522	0.00432077
A8K7D9	Importin subunit alpha OS=Homo sapiens PE=2 SV=1 - [A8K7D9_HUMAN]	35.73	14	14	60	529	57.7979	5.40186	1.14588	1.16325	1.12459	1.14457	0.794399	0.94566	0.898218	0.879426	0.768344	0.00451059
A0A024RDF4	Heterogeneous nuclear ribonucleoprotein D (AU-rich element RNA binding protein 1, 37kDa), isoform CRA_e OS=Homo sapiens GN=HNRPD PE=4 SV=1 - [A0A024RDF4_HUMAN]	39.54	2	15	168	306	32.8141	8.1626	1.18901	1.1022	1.02465	1.10529	0.740513	0.693523	0.82798	0.754005	0.68218	0.00469824
Q5JXX1	Mortality factor 4-like protein 2 (Fragment) OS=Homo sapiens GN=MORF4L2 PE=1 SV=1 - [Q5JXX1_HUMAN]	17.09	3	3	10	158	17.6062	10.4331	1.17721	1.088	1.10716	1.12413	0.757638	0.910464	0.811601	0.826568	0.735298	0.00471986
B3KS36	cDNA FLJ35376 fis, clone SKMUS2004044, highly similar to Homo sapiens ribosomal protein L3 (RPL3), transcript variant 2, mRNA OS=Homo sapiens PE=2 SV=1 - [B3KS36_HUMAN]	44.63	1	17	96	354	40.1197	10.3013	1.17864	1.17599		1.17731	0.872667	0.912586		0.892627	0.75819	0.00490097
B3KRC6	cDNA FLJ34004 fis, clone FCBBF1000232, highly similar to Cytochrome P450 51A1 (EC 1.14.13.70) OS=Homo sapiens PE=2 SV=1 - [B3KRC6_HUMAN]	20.94	7	7	14	449	51.3894	8.47021	1.07779	1.11856	1.2372	1.14452	0.891588	0.877716	0.878549	0.882617	0.77117	0.0054933
B3KXW2	cDNA FLJ46178 fis, clone TESTI4003944, highly similar to Homo sapiens zinc finger protein 532 (ZNF532), mRNA OS=Homo sapiens PE=2 SV=1 - [B3KXW2_HUMAN]	2.23	2	2	3	1301	141.616	8.646	1.10422	1.21526	1.2617	1.19373	0.811361	0.804671	0.935616	0.850549	0.712514	0.00558251
Q12872	Splicing factor, suppressor of white-apricot homolog OS=Homo sapiens GN=SFSWAP PE=1 SV=3 - [SFSWA_HUMAN]	3.89	3	3	7	951	104.758	8.04541	1.26827	1.10094	1.21038	1.19319	0.766764	0.920716	0.813035	0.833505	0.698549	0.00580808
Q13823	Nucleolar GTP-binding protein 2 OS=Homo sapiens GN=GNL2 PE=1 SV=1 - [NOG2_HUMAN]	14.77	10	10	18	731	83.6034	9.24658	1.13375	1.25271	1.09874	1.16173	0.788698	0.776745	0.908765	0.824736	0.709919	0.0058341
Q9BVJ6	U3 small nucleolar RNA-associated protein 14 homolog A OS=Homo sapiens GN=UTP14A PE=1 SV=1 - [UT14A_HUMAN]	26.98	17	17	36	771	87.9241	7.86963	1.17611	1.1385	1.07935	1.13132	0.756944	0.81973	0.922203	0.832959	0.736273	0.00589477
Q9Y6H1	Coiled-coil-helix-coiled-coil-helix domain-containing protein 2 OS=Homo sapiens GN=CHCHD2 PE=1 SV=1 - [CHCH2_HUMAN]	15.23	2	2	10	151	15.5027	9.21729	1.15709	1.10437	1.16529	1.14225	0.827306	0.936767	0.749743	0.837939	0.733586	0.00612225
M0R338	Single-stranded DNA-binding protein 4 OS=Homo sapiens GN=SSBP4 PE=1 SV=1 - [M0R338_HUMAN]	20.75	1	1	2	53	5.63075	9.45166	1.10586		1.13203	1.11894	0.841353		0.799957	0.820655	0.733419	0.00667182
Q9NSI2	Protein FAM207A OS=Homo sapiens GN=FAM207A PE=1 SV=2 - [F207A_HUMAN]	23.04	5	5	10	230	25.4408	11.0776	1.23262	1.2539	1.12959	1.20537	0.662159	0.687704	0.912433	0.754099	0.625617	0.00692858
F8VZJ2	Nascent polypeptide-associated complex subunit alpha OS=Homo sapiens GN=NACA PE=1 SV=1 - [F8VZJ2_HUMAN]	40.44	3	4	52	136	15.0068	4.90674	1.08689	1.00375	1.04887	1.0465	0.821706	0.888046	0.902391	0.870715	0.832024	0.00705596
P08581	Hepatocyte growth factor receptor OS=Homo sapiens GN=MET PE=1 SV=4 - [MET_HUMAN]	30.94	33	34	142	1390	155.441	7.32764	1.02652	1.09619	1.17157	1.09809	0.883731	0.826001	0.75912	0.82295	0.749435	0.0075887
Q5T280	Putative methyltransferase C9orf114 OS=Homo sapiens GN=C9orf114 PE=1 SV=3 - [CI114_HUMAN]	9.04	3	3	4	376	41.9824	7.43018	1.13295	1.16329	1.02401	1.10675	0.876007	0.883394	0.910691	0.890031	0.804182	0.00763664
P08582	Melanotransferrin OS=Homo sapiens GN=MELTF PE=1 SV=2 - [TRFM_HUMAN]	3.93	2	2	3	738	80.1633	5.93506	1.02386	1.12981	1.05731	1.07033	0.907266	0.812258	0.877851	0.865792	0.808902	0.0082396
B2R4U3	cDNA, FLJ92217, highly similar to Homo sapiens ubiquitin-conjugating enzyme E2C (UBE2C), mRNA OS=Homo sapiens PE=2 SV=1 - [B2R4U3_HUMAN]	27.93	4	4	14	179	19.6059	7.37158	1.13718	1.15492	1.32074	1.20428	0.796027	0.936628	0.808126	0.846927	0.703264	0.00837112
Q96T88	E3 ubiquitin-protein ligase UHRF1 OS=Homo sapiens GN=UHRF1 PE=1 SV=1 - [UHRF1_HUMAN]	12.11	9	9	22	793	89.757	7.56201	1.07448	1.10693	1.2109	1.13077	0.925245	0.95054	0.912994	0.929593	0.822089	0.00915899
B4DE67	cDNA FLJ57259, highly similar to Lysosomal acid lipase/cholesteryl esterhydrolase (EC 3.1.1.13) OS=Homo sapiens PE=2 SV=1 - [B4DE67_HUMAN]	13.24	2	2	4	204	23.5377	7.2251	1.09187	1.06468	1.14678	1.10111	0.851412	0.970461	0.886433	0.902769	0.819871	0.00976641
P63173	60S ribosomal protein L38 OS=Homo sapiens GN=RPL38 PE=1 SV=2 - [RL38_HUMAN]	47.14	4	5	38	70	8.21273	10.0962	1.11273	1.08683	1.16539	1.12165	0.875393	0.921289	0.994733	0.930472	0.829556	0.0101815
Q96GA3	Protein LTV1 homolog OS=Homo sapiens GN=LTV1 PE=1 SV=1 - [LTV1_HUMAN]	12.42	5	5	8	475	54.8212	4.90674	1.1146	1.01036	0.989314	1.03809	0.839542	0.842074	0.744667	0.808761	0.779084	0.0103291
A0A087X1T2	Sterol regulatory element-binding protein 2 OS=Homo sapiens GN=SREBF2 PE=1 SV=1 - [A0A087X1T2_HUMAN]	3.67	2	2	4	654	70.2134	8.83643	1.07883	1.03272	1.14239	1.08465	0.865659	0.911552	0.764267	0.847159	0.781046	0.0116286
Q8N4P8	GTPBP4 protein (Fragment) OS=Homo sapiens GN=GTPBP4 PE=2 SV=1 - [Q8N4P8_HUMAN]	27.22	17	17	42	632	73.6628	9.5542	1.10224	1.16671	1.08697	1.11864	0.800438	0.835579	0.971038	0.869018	0.77685	0.0122136
B2R4N3	cDNA, FLJ92155, highly similar to Homo sapiens ubiquitin-like 5 (UBL5), mRNA OS=Homo sapiens PE=2 SV=1 - [B2R4N3_HUMAN]	24.66	2	2	8	73	8.54237	7.28369	1.04284	1.0954	1.13006	1.08943	0.875311	0.958346	0.821678	0.885112	0.812451	0.0123185
O00767	Acyl-CoA desaturase OS=Homo sapiens GN=SCD PE=1 SV=2 - [ACOD_HUMAN]	3.62	1	1	3	359	41.4961	8.99756	1.03263	1.20737	1.33889	1.19297	0.853139	0.690922	0.713404	0.752488	0.630771	0.0125426
H3BMQ2	Probable ribosome biogenesis protein RLP24 (Fragment) OS=Homo sapiens GN=RSL24D1 PE=1 SV=1 - [H3BMQ2_HUMAN]	18.18	1	1	3	66	8.12844	10.521	1.15597	1.10379	1.10493	1.12156	0.786943	0.93105	0.950336	0.889443	0.793039	0.0129395
O15230	Laminin subunit alpha-5 OS=Homo sapiens GN=LAMA5 PE=1 SV=8 - [LAMA5_HUMAN]	1.06	3	3	4	3695	399.479	7.02002		1.13527	1.14025	1.13776		0.82977	0.894611	0.862191	0.757794	0.0136384
P62081	40S ribosomal protein S7 OS=Homo sapiens GN=RPS7 PE=1 SV=1 - [RS7_HUMAN]	27.84	6	6	58	194	22.1133	10.0962	1.08827	1.10879	1.08087	1.09264	0.7997	0.862453	0.973383	0.878512	0.804025	0.0141319
E9PM82	Activating signal cointegrator 1 complex subunit 1 (Fragment) OS=Homo sapiens GN=ASCC1 PE=1 SV=1 - [E9PM82_HUMAN]	7.26	1	1	4	124	14.1943	7.34229	1.11135	1.22956	1.12852	1.15648	0.705018	0.724348	0.952084	0.793817	0.686409	0.0143118
Q5VV42	Threonylcarbamoyladenosine tRNA methylthiotransferase OS=Homo sapiens GN=CDKAL1 PE=1 SV=1 - [CDKAL_HUMAN]	7.43	4	4	6	579	65.0701	7.45947	1.15851	1.07179	1.13009	1.12013	0.779087	0.955784	0.90768	0.880851	0.786383	0.0150532
B4DE48	cDNA FLJ53824, highly similar to Sorting nexin-17 OS=Homo sapiens PE=2 SV=1 - [B4DE48_HUMAN]	9.32	3	3	8	440	49.7237	8.03076	1.24409	1.09361	1.27107	1.20292	0.640634	0.938509	0.792797	0.790647	0.657271	0.0156779
B4DT46	cDNA FLJ57889, highly similar to Cytochrome b-245 light chain OS=Homo sapiens PE=2 SV=1 - [B4DT46_HUMAN]	7.63	1	1	2	131	14.0105	9.48096	1.10114		1.19321	1.14718	0.771556		0.809898	0.790727	0.68928	0.0190152
C9JCN8	Fos-related antigen 2 (Fragment) OS=Homo sapiens GN=FOSL2 PE=1 SV=1 - [C9JCN8_HUMAN]	9.9	2	2	3	202	22.2405	8.77783		1.00802	1.0328	1.02041		0.822833	0.76275	0.792791	0.776935	0.0197776
B3KNS8	cDNA FLJ30322 fis, clone BRACE2006703, highly similar to Surfeit locus protein 6 OS=Homo sapiens PE=2 SV=1 - [B3KNS8_HUMAN]	10.8	4	4	5	361	41.4836	10.5942	1.22933	1.12823	1.07832	1.14529	0.661861	0.881235	0.901319	0.814805	0.711438	0.0203147
F6TR53	HCLS1-binding protein 3 OS=Homo sapiens GN=HS1BP3 PE=1 SV=1 - [F6TR53_HUMAN]	12.68	2	2	2	213	23.5858	4.83057	1.08224		1.15841	1.12032	0.854432		0.859525	0.856978	0.764939	0.02037
Q2M2H8	Probable maltase-glucoamylase 2 OS=Homo sapiens GN=MGAM2 PE=2 SV=3 - [MGAL_HUMAN]	7.63	17	17	29	2515	277.816	5.21143	1.01662	1.11518	1.10442	1.07874	0.827854	0.801118	0.959632	0.862868	0.799886	0.0205459
Q09472	Histone acetyltransferase p300 OS=Homo sapiens GN=EP300 PE=1 SV=2 - [EP300_HUMAN]	1.12	3	3	4	2414	263.99	8.49951	1.07922		1.11818	1.0987	0.879769		0.922759	0.901264	0.820301	0.020909
H0UI22	Arginyl-tRNA synthetase-like, isoform CRA_e OS=Homo sapiens GN=RARSL PE=3 SV=1 - [H0UI22_HUMAN]	4.22	2	2	2	403	45.9676	7.53271	1.12596		1.07583	1.1009	0.830615		0.883727	0.857171	0.778613	0.021721
Q6PJ25	Phospholipid-transporting ATPase (Fragment) OS=Homo sapiens GN=ATP11A PE=2 SV=1 - [Q6PJ25_HUMAN]	2.14	1	2	3	934	106.412	6.41748		1.12265	1.09532	1.10898		0.82318	0.89365	0.858415	0.774056	0.0220009
A8K201	cDNA FLJ75605, highly similar to Homo sapiens CGI-115 protein (CGI-115), mRNA OS=Homo sapiens PE=2 SV=1 - [A8K201_HUMAN]	16.99	4	4	9	259	28.8972	5.37646	1.18573	1.25513	0.946466	1.12911	0.751369	0.77671	0.837743	0.788607	0.698433	0.0246195
Q52LW3	Rho GTPase-activating protein 29 OS=Homo sapiens GN=ARHGAP29 PE=1 SV=2 - [RHG29_HUMAN]	2.14	2	3	5	1261	141.974	6.7417	1.07731	1.01899	1.17062	1.08898	0.937373	0.916663	0.824585	0.892874	0.819921	0.0250504
D3DR37	Centrosomal protein 55kDa, isoform CRA_a OS=Homo sapiens GN=CEP55 PE=1 SV=1 - [D3DR37_HUMAN]	7.11	3	3	5	464	54.0912	6.96143	1.05348	1.03452	1.2255	1.1045	0.88547	0.905093	0.789707	0.86009	0.778713	0.0255791
A0A0A0MTB0	Serine incorporator 5 OS=Homo sapiens GN=SERINC5 PE=1 SV=1 - [A0A0A0MTB0_HUMAN]	4.08	2	2	3	417	46.2218	7.60596		1.08909	1.12247	1.10578		0.870261	0.784297	0.827279	0.748139	0.0263315
P52735	Guanine nucleotide exchange factor VAV2 OS=Homo sapiens GN=VAV2 PE=1 SV=2 - [VAV2_HUMAN]	2.28	2	2	4	878	101.224	7.07861	1.13568	1.08003		1.10785	0.800065	0.871745		0.835905	0.754529	0.0267272
Q75MX0	Putative uncharacterized protein SEMA3C (Fragment) OS=Homo sapiens GN=SEMA3C PE=4 SV=1 - [Q75MX0_HUMAN]	10.23	1	1	2	88	10.0781	5.75732	1.15207		1.30155	1.22681	0.794929		0.787245	0.791087	0.644834	0.0282574
P62861	40S ribosomal protein S30 OS=Homo sapiens GN=FAU PE=1 SV=1 - [RS30_HUMAN]	16.95	1	1	15	59	6.64382	12.147	1.19397	1.1205	1.11435	1.14294	0.847811	0.899033	1.04321	0.930017	0.813706	0.0289666
Q9Y4B5	Microtubule cross-linking factor 1 OS=Homo sapiens GN=MTCL1 PE=1 SV=5 - [MTCL1_HUMAN]	1.73	3	3	7	1905	209.397	6.43018	1.05121	1.16109	0.989464	1.06726	0.824167	0.873127	0.929963	0.875752	0.820565	0.031118
Q13895	Bystin OS=Homo sapiens GN=BYSL PE=1 SV=3 - [BYST_HUMAN]	30.21	12	12	30	437	49.57	8.11865	1.1458	1.26006	1.05529	1.15372	0.754708	0.700477	0.98293	0.812705	0.704422	0.0313291
Q6DKI1	60S ribosomal protein L7-like 1 OS=Homo sapiens GN=RPL7L1 PE=1 SV=1 - [RL7L_HUMAN]	27.24	6	6	13	246	28.6431	10.5063	1.20287	1.27458	1.07742	1.18496	0.736066	0.674594	1.00689	0.805849	0.680066	0.0318422
E9PLD3	Uncharacterized protein OS=Homo sapiens PE=4 SV=1 - [E9PLD3_HUMAN]	13.13	1	1	4	99	11.5928	12.2349	1.07801	1.05898	1.06735	1.06811	0.67526	0.859172	0.930425	0.821619	0.769225	0.0318481
B2R841	Serine/threonine-protein kinase PLK OS=Homo sapiens PE=2 SV=1 - [B2R841_HUMAN]	26.04	13	13	22	603	68.2216	8.90967	1.04838	1.07934	1.23427	1.12066	0.883149	0.972265	0.856474	0.903962	0.806633	0.0323173
O75438	NADH dehydrogenase [ubiquinone] 1 beta subcomplex subunit 1 OS=Homo sapiens GN=NDUFB1 PE=1 SV=1 - [NDUB1_HUMAN]	32.76	2	2	4	58	6.95664	8.92432		1.17607	1.07973	1.1279		0.873585	0.880646	0.877115	0.777656	0.035147
D6RBD9	Thioredoxin domain-containing protein 15 (Fragment) OS=Homo sapiens GN=TXNDC15 PE=1 SV=1 - [D6RBD9_HUMAN]	12.26	1	1	2	155	16.8711	4.41162		1.30221	1.13827	1.22024		0.783098	0.823804	0.803451	0.658437	0.0386988
Q9HBR0	Putative sodium-coupled neutral amino acid transporter 10 OS=Homo sapiens GN=SLC38A10 PE=1 SV=2 - [S38AA_HUMAN]	14.3	13	13	28	1119	119.687	5.73193	1.01838	1.13523	1.19557	1.11639	0.978848	0.915527	0.812176	0.902183	0.808122	0.0395506
A5YRV2	MUC1 isoform T11 OS=Homo sapiens GN=MUC1 PE=2 SV=1 - [A5YRV2_HUMAN]	17.97	3	3	9	217	23.3319	8.26514	1.12267	0.98614	1.23229	1.1137	0.925131	0.884347	0.87704	0.895506	0.804082	0.0399791
Q6FHK1	MRPL28 protein (Fragment) OS=Homo sapiens GN=MRPL28 PE=2 SV=1 - [Q6FHK1_HUMAN]	9.38	1	1	2	128	14.7997	4.90674	1.11924	1.07074		1.09499	0.843056	0.917565		0.88031	0.803941	0.0402973
P62857	40S ribosomal protein S28 OS=Homo sapiens GN=RPS28 PE=1 SV=1 - [RS28_HUMAN]	46.38	3	3	50	69	7.8362	10.6968	1.14765	1.05749	0.972464	1.0592	0.839317	0.848184	0.946066	0.877856	0.828789	0.0411398
Q96EX3	WD repeat-containing protein 34 OS=Homo sapiens GN=WDR34 PE=1 SV=2 - [WDR34_HUMAN]	5.6	2	2	2	536	57.7643	6.63916	1.10942		1.19543	1.15242	0.880087		0.938506	0.909296	0.78903	0.0428105
B4DYY3	cDNA FLJ55644, highly similar to Bardet-Biedl syndrome 1 protein OS=Homo sapiens PE=2 SV=1 - [B4DYY3_HUMAN]	9.09	1	1	2	165	18.4836	7.18115		1.07099	1.19762	1.1343		0.811103	0.846626	0.828865	0.730725	0.0433575
Q14517	Protocadherin Fat 1 OS=Homo sapiens GN=FAT1 PE=1 SV=2 - [FAT1_HUMAN]	3.64	12	12	22	4588	505.958	4.99561	1.06089	1.08516	1.28128	1.14244	0.943586	0.86941	0.663296	0.825431	0.722514	0.043844
P62273	40S ribosomal protein S29 OS=Homo sapiens GN=RPS29 PE=1 SV=2 - [RS29_HUMAN]	46.43	3	3	8	56	6.6723	10.1255	1.12226	1.05553	0.967897	1.04856	0.787062	0.94974	0.755675	0.830825	0.792346	0.0438647
Q9Y3C1	Nucleolar protein 16 OS=Homo sapiens GN=NOP16 PE=1 SV=2 - [NOP16_HUMAN]	30.9	4	4	4	178	21.1751	9.93506	1.04379	1.20034	1.11484	1.11965	0.999332	0.827874	0.943424	0.923543	0.824847	0.0444497
I3L172	Protein MCRIP2 OS=Homo sapiens GN=MCRIP2 PE=1 SV=1 - [I3L172_HUMAN]	33.85	2	2	5	65	7.02772	10.9458	1.01057	1.08502	1.14036	1.07865	0.97009	0.857183	0.734472	0.853915	0.791652	0.0445172
A8KAQ3	cDNA FLJ76489, highly similar to Homo sapiens sortilin 1 (SORT1), mRNA OS=Homo sapiens PE=2 SV=1 - [A8KAQ3_HUMAN]	4.21	3	3	9	831	91.9785	5.74463	1.04639	1.0018	1.22157	1.08992	0.856324	0.893142	0.645217	0.798228	0.732373	0.0463276
Q5TEC6	Histone H3 OS=Homo sapiens GN=HIST2H3PS2 PE=1 SV=1 - [Q5TEC6_HUMAN]	36.03	4	7	65	136	15.4206	11.2681	1.02407	1.0829	1.10136	1.06944	0.855838	0.982654	0.741399	0.859964	0.804122	0.0463354
Q8NEF9	Serum response factor-binding protein 1 OS=Homo sapiens GN=SRFBP1 PE=1 SV=1 - [SRFB1_HUMAN]	12.82	6	6	9	429	48.6044	9.5835	1.08733	1.24194	1.02993	1.11973	0.746256	0.860036	0.974035	0.860109	0.76814	0.0466661
B2R823	cDNA, FLJ93703, highly similar to Homo sapiens putatative 28 kDa protein (LOC56902), mRNA OS=Homo sapiens PE=2 SV=1 - [B2R823_HUMAN]	23.02	5	5	13	252	27.9229	9.72998	1.18042	1.27101	1.00152	1.15098	0.685614	0.696309	0.989064	0.790329	0.686656	0.0469755
Q9H5M4	cDNA: FLJ23304 fis, clone HEP11377 OS=Homo sapiens PE=2 SV=1 - [Q9H5M4_HUMAN]	7.14	2	2	2	280	32.6446	8.98291		1.08606	1.16341	1.12473		0.911328	0.952102	0.931715	0.828387	0.0476643
J3QR09	Ribosomal protein L19 OS=Homo sapiens GN=RPL19 PE=1 SV=1 - [J3QR09_HUMAN]	35.75	8	9	60	193	23.1201	11.4731	1.05334	1.07837	1.01168	1.0478	0.762372	0.807943	0.982336	0.850884	0.81207	0.0477655
O43805	Sjoegren syndrome nuclear autoantigen 1 OS=Homo sapiens GN=SSNA1 PE=1 SV=2 - [SSNA1_HUMAN]	10.92	1	1	2	119	13.5879	5.37646		1.22662	1.28217	1.25439		0.926761	1.03813	0.982444	0.783203	0.0485725
Q9BVP2	Guanine nucleotide-binding protein-like 3 OS=Homo sapiens GN=GNL3 PE=1 SV=2 - [GNL3_HUMAN]	27.5	13	14	22	549	61.9545	9.15869	1.19133	1.27745	1.02554	1.16477	0.815907	0.656668	0.994353	0.822309	0.705982	0.0488941
P83881	60S ribosomal protein L36a OS=Homo sapiens GN=RPL36A PE=1 SV=2 - [RL36A_HUMAN]	26.42	2	5	32	106	12.4328	10.5796	1.16732	1.05803	0.985676	1.07034	0.735693	0.845116	0.950203	0.843671	0.788226	0.049545
Q8WW59	SPRY domain-containing protein 4 OS=Homo sapiens GN=SPRYD4 PE=1 SV=2 - [SPRY4_HUMAN]	22.22	4	4	7	207	23.114	6.93213	0.967543	0.976234	0.971167	0.971648	1.06659	1.07271	1.0667	1.06867	1.09985	7.32434e-06
A0A024RCR6	HLA-B associated transcript 3, isoform CRA_a OS=Homo sapiens GN=BAT3 PE=1 SV=1 - [A0A024RCR6_HUMAN]	13.68	12	12	34	1126	118.629	5.60498	1.05431	1.04951	1.06762	1.05715	0.9161	0.937901	0.931872	0.928624	0.878424	0.000109565
Q8N5K1	CDGSH iron-sulfur domain-containing protein 2 OS=Homo sapiens GN=CISD2 PE=1 SV=1 - [CISD2_HUMAN]	50.37	6	6	16	135	15.2685	9.61279	0.980576	0.964101	0.958528	0.967735	1.06572	1.056	1.06828	1.06333	1.09879	0.000230187
B4DU58	cDNA FLJ51488, highly similar to Macrophage capping protein OS=Homo sapiens PE=2 SV=1 - [B4DU58_HUMAN]	26.91	8	8	91	327	36.2254	6.25244	0.961011	0.972603	0.960726	0.96478	1.02747	1.01989	1.01899	1.02212	1.05943	0.000269542
P45880	Voltage-dependent anion-selective channel protein 2 OS=Homo sapiens GN=VDAC2 PE=1 SV=2 - [VDAC2_HUMAN]	47.28	11	11	101	294	31.5465	7.56201	0.95869	0.968582	0.958648	0.961973	1.02341	1.03268	1.04214	1.03275	1.07357	0.000365662
B4DYK6	cDNA FLJ56887, highly similar to Homo sapiens guanine nucleotide binding protein-like 1 (GNL1), mRNA OS=Homo sapiens PE=2 SV=1 - [B4DYK6_HUMAN]	18.18	9	9	26	605	68.2142	5.46533	0.953228	0.944726	0.968814	0.955589	1.03685	1.05209	1.05015	1.04636	1.09499	0.000440688
Q7L0Y3	Mitochondrial ribonuclease P protein 1 OS=Homo sapiens GN=TRMT10C PE=1 SV=2 - [MRRP1_HUMAN]	42.68	14	14	39	403	47.3166	9.36377	0.983256	0.980275	0.969816	0.977783	1.03562	1.02589	1.02882	1.03011	1.05352	0.000468308
B2RD79	cDNA, FLJ96494, highly similar to Homo sapiens ubiquitin specific peptidase 14 (tRNA-guanine transglycosylase) (USP14), mRNA OS=Homo sapiens PE=2 SV=1 - [B2RD79_HUMAN]	45.75	22	22	83	494	56.006	5.30029	0.947097	0.946748	0.959811	0.951219	1.07118	1.04587	1.04304	1.05336	1.10738	0.000502644
Q96RE7	Nucleus accumbens-associated protein 1 OS=Homo sapiens GN=NACC1 PE=1 SV=1 - [NACC1_HUMAN]	6.83	3	3	6	527	57.2218	5.74463	1.08006	1.10978	1.0689	1.08625	0.941266	0.912548	0.905761	0.919858	0.846823	0.000524847
J9JIC7	Vascular endothelial zinc finger 1 (Fragment) OS=Homo sapiens GN=VEZF1 PE=1 SV=1 - [J9JIC7_HUMAN]	2.35	1	1	3	340	37.4066	9.40771	0.921898	0.942969	0.939665	0.934844	1.07591	1.12229	1.08176	1.09332	1.16952	0.000580807
A8K6K7	cDNA FLJ76881, highly similar to Homo sapiens glycogen synthase 1 (muscle) (GYS1), mRNA OS=Homo sapiens PE=2 SV=1 - [A8K6K7_HUMAN]	19.81	10	10	23	737	83.7605	6.17627	0.968603	0.97915	0.963396	0.970383	1.04189	1.02542	1.04058	1.03597	1.06758	0.000734388
B3KY60	cDNA FLJ16777 fis, clone BRHIP2029567, highly similar to Cell division cycle 5-like protein OS=Homo sapiens PE=2 SV=1 - [B3KY60_HUMAN]	33.29	21	21	58	802	92.2197	8.17725	1.00654	1.00567	0.996546	1.00292	1.04511	1.03639	1.04087	1.04079	1.03776	0.000741711
Q9C055	Inositol polyphosphate-5-phosphatase (Fragment) OS=Homo sapiens GN=INPP5A PE=4 SV=1 - [Q9C055_HUMAN]	6.21	2	2	3	306	35.6361	7.50342		1.05594	1.04759	1.05176		0.92134	0.923456	0.922398	0.877	0.00110637
Q5T8P6	RNA-binding protein 26 OS=Homo sapiens GN=RBM26 PE=1 SV=3 - [RBM26_HUMAN]	5.06	5	5	6	1007	113.527	9.15869	0.964471	0.945367	0.950533	0.953457	1.06169	1.07646	1.03732	1.05849	1.11016	0.00118713
A8K556	cDNA FLJ78217 OS=Homo sapiens PE=2 SV=1 - [A8K556_HUMAN]	11.2	3	3	23	357	40.2589	8.14795	1.05192	1.08762	1.06313	1.06756	0.92215	0.917245	0.959009	0.932801	0.873771	0.00133343
E9PB90	Hexokinase-2 OS=Homo sapiens GN=HK2 PE=1 SV=1 - [E9PB90_HUMAN]	31.27	19	23	63	889	98.9088	6.03662	1.03604	1.04423	1.07255	1.05094	0.949772	0.95589	0.968713	0.958125	0.911684	0.00169764
Q2L6I2	ABC50 protein OS=Homo sapiens GN=ABCF1 PE=4 SV=1 - [Q2L6I2_HUMAN]	24.91	16	17	75	807	91.6235	7.6792	0.964824	0.985536	0.96816	0.97284	1.02719	1.01613	1.0212	1.02151	1.05003	0.00246263
Q7Z7H5	Transmembrane emp24 domain-containing protein 4 OS=Homo sapiens GN=TMED4 PE=1 SV=1 - [TMED4_HUMAN]	33.92	5	7	27	227	25.9263	8.27979	0.912418	0.94759	0.938235	0.932748	1.00234	1.00364	1.00719	1.00439	1.07681	0.00251424
Q9NQ84	G-protein coupled receptor family C group 5 member C OS=Homo sapiens GN=GPRC5C PE=1 SV=2 - [GPC5C_HUMAN]	7.03	2	2	4	441	48.1617	8.42627		1.10429	1.0921	1.0982		0.949481	0.939911	0.944696	0.860225	0.0025377
Q86X55	Histone-arginine methyltransferase CARM1 OS=Homo sapiens GN=CARM1 PE=1 SV=3 - [CARM1_HUMAN]	11.35	7	7	16	608	65.8114	6.72705	0.919561	0.938219	0.958734	0.938838	1.06495	1.05294	1.02503	1.04764	1.11589	0.00265699
F2Z2V0	Copine-1 (Fragment) OS=Homo sapiens GN=CPNE1 PE=1 SV=1 - [F2Z2V0_HUMAN]	13.51	7	7	22	533	58.5973	5.8335	0.933158	0.919053	0.93795	0.930054	1.11237	1.05767	1.04397	1.07134	1.15191	0.00284802
Q9NX46	Poly(ADP-ribose) glycohydrolase ARH3 OS=Homo sapiens GN=ADPRHL2 PE=1 SV=1 - [ARHL2_HUMAN]	18.73	6	6	14	363	38.9222	5.07178	0.983827	0.987242	0.945991	0.972353	1.09032	1.07141	1.06156	1.07443	1.10498	0.00287501
O15294	UDP-N-acetylglucosamine--peptide N-acetylglucosaminyltransferase 110 kDa subunit OS=Homo sapiens GN=OGT PE=1 SV=3 - [OGT1_HUMAN]	6.5	6	6	8	1046	116.85	6.69775	0.989325	1.03671	1.01163	1.01255	0.916886	0.884313	0.908479	0.903226	0.892028	0.00288471
P30085	UMP-CMP kinase OS=Homo sapiens GN=CMPK1 PE=1 SV=3 - [KCY_HUMAN]	46.94	7	7	35	196	22.2083	5.56689	0.942128	0.936197	0.883148	0.920491	1.0392	1.07477	1.06365	1.05921	1.1507	0.00296683
B7ZKK7	EIF2AK2 protein OS=Homo sapiens GN=EIF2AK2 PE=2 SV=1 - [B7ZKK7_HUMAN]	23.99	12	12	48	546	61.4723	8.29443	0.954744	0.944803	0.982458	0.960668	1.03479	1.03292	1.04788	1.03853	1.08105	0.00310256
P15121	Aldose reductase OS=Homo sapiens GN=AKR1B1 PE=1 SV=3 - [ALDR_HUMAN]	31.01	9	10	49	316	35.8305	6.97607	0.895306	0.880944	0.872813	0.883021	1.04801	0.991495	0.991414	1.01031	1.14415	0.00310541
Q53GA7	Tubulin alpha chain (Fragment) OS=Homo sapiens PE=2 SV=1 - [Q53GA7_HUMAN]	42.76	5	17	532	449	49.7914	5.13525	1.02719	1.02699	1.02325	1.02581	0.998915	1.00958	0.99955	1.00268	0.977455	0.00329198
K7EKD8	Calpain small subunit 1 OS=Homo sapiens GN=CAPNS1 PE=1 SV=1 - [K7EKD8_HUMAN]	23.53	5	5	16	238	24.786	5.10986	0.970432	0.979528	0.938924	0.962961	1.05997	1.03899	1.04589	1.04828	1.0886	0.00344454
B7Z8F4	cDNA FLJ56523, highly similar to ATP-dependent RNA helicase DHX8 (EC 3.6.1.-) OS=Homo sapiens PE=2 SV=1 - [B7Z8F4_HUMAN]	8.89	8	9	10	1181	133.873	7.88428	1.0731	1.04895	1.04703	1.05636	0.921576	0.968505	0.96306	0.951047	0.900307	0.00347343
B3KUL5	Oxysterol-binding protein OS=Homo sapiens PE=2 SV=1 - [B3KUL5_HUMAN]	9.16	4	5	16	764	83.8903	8.30908	1.03463	1.01957	1.02231	1.0255	0.907338	0.955681	0.938864	0.933961	0.910737	0.00356538
B4DZH9	cDNA FLJ55166, highly similar to EH-domain-containing protein 1 OS=Homo sapiens PE=2 SV=1 - [B4DZH9_HUMAN]	23.2	8	11	34	431	49.2669	7.76709	1.01107	0.997898	1.01651	1.00849	1.05097	1.0702	1.05374	1.0583	1.04939	0.00364237
B4E0Y8	cDNA FLJ58970, highly similar to Homo sapiens SYF2 homolog, RNA splicing factor (SYF2), transcript variant 1, mRNA OS=Homo sapiens PE=2 SV=1 - [B4E0Y8_HUMAN]	22.44	3	3	4	156	18.4217	8.80713		1.0338	1.02825	1.03102		0.920554	0.907233	0.913894	0.886394	0.00377505
O43291	Kunitz-type protease inhibitor 2 OS=Homo sapiens GN=SPINT2 PE=1 SV=2 - [SPIT2_HUMAN]	17.86	3	4	10	252	28.2098	8.29443	1.05044	1.05491	0.977796	1.02772	0.86852	0.883971	0.868001	0.873497	0.849941	0.00379111
P18583	Protein SON OS=Homo sapiens GN=SON PE=1 SV=4 - [SON_HUMAN]	7.63	6	13	24	2426	263.664	5.64307	0.95965		0.947498	0.953574	1.06583		1.05793	1.06188	1.11358	0.00444779
Q9BTT5	Similar to NADH dehydrogenase (Ubiquinone) 1 alpha subcomplex, 9 (39kD) (Fragment) OS=Homo sapiens PE=2 SV=1 - [Q9BTT5_HUMAN]	30.77	9	9	26	338	38.4175	9.67139	1.05759	1.07605	1.06698	1.06687	0.908685	0.95892	0.976445	0.948017	0.888596	0.00479876
B7Z6E8	cDNA FLJ59425, highly similar to SH3-domain kinase-binding protein 1 OS=Homo sapiens PE=2 SV=1 - [B7Z6E8_HUMAN]	20.3	7	7	18	404	44.208	8.98291	1.03014	1.04339	1.0326	1.03538	0.99518	0.964018	0.980331	0.979843	0.946363	0.00491955
P16402	Histone H1.3 OS=Homo sapiens GN=HIST1H1D PE=1 SV=2 - [H13_HUMAN]	37.1	4	12	141	221	22.3363	11.019	1.10677	1.14332	1.05887	1.10299	0.938827	0.888388	0.954208	0.927141	0.840574	0.00505748
Q8NF37	Lysophosphatidylcholine acyltransferase 1 OS=Homo sapiens GN=LPCAT1 PE=1 SV=2 - [PCAT1_HUMAN]	15.17	7	7	25	534	59.1134	6.02393	1.0436	1.10422	1.11882	1.08888	0.908226	0.945504	0.956618	0.936783	0.860315	0.00507552
P61970	Nuclear transport factor 2 OS=Homo sapiens GN=NUTF2 PE=1 SV=1 - [NTF2_HUMAN]	69.29	5	5	19	127	14.469	5.37646	0.976947	0.96513	0.911319	0.951132	1.06659	1.0584	1.07589	1.06696	1.12178	0.00511095
B2RDY9	Adenylyl cyclase-associated protein OS=Homo sapiens PE=2 SV=1 - [B2RDY9_HUMAN]	47.58	18	18	115	475	51.5826	8.22119	0.979936	0.949328	0.951058	0.960107	1.01553	1.02271	1.03634	1.02486	1.06744	0.00513472
O75534	Cold shock domain-containing protein E1 OS=Homo sapiens GN=CSDE1 PE=1 SV=2 - [CSDE1_HUMAN]	36.47	26	26	78	798	88.8289	6.25244	1.03234	1.00396	1.04556	1.02728	0.932491	0.960211	0.930229	0.940977	0.915984	0.0052209
P21796	Voltage-dependent anion-selective channel protein 1 OS=Homo sapiens GN=VDAC1 PE=1 SV=2 - [VDAC1_HUMAN]	63.25	13	14	234	283	30.7536	8.54346	0.964756	0.985302	0.955582	0.968547	1.04423	1.02117	1.02472	1.03004	1.06349	0.00560781
Q99828	Calcium and integrin-binding protein 1 OS=Homo sapiens GN=CIB1 PE=1 SV=4 - [CIB1_HUMAN]	27.23	4	4	14	191	21.6899	4.77979	1.07407	1.07793	1.03427	1.06209	0.938474	0.909666	0.971165	0.939768	0.884829	0.00563733
M0R2N0	Protein SMG9 (Fragment) OS=Homo sapiens GN=SMG9 PE=1 SV=1 - [M0R2N0_HUMAN]	36.54	3	3	4	156	16.6225	9.68604	1.03561	1.07292	0.997292	1.03528	0.917258	0.903123	0.920614	0.913665	0.882532	0.00565699
P40925	Malate dehydrogenase, cytoplasmic OS=Homo sapiens GN=MDH1 PE=1 SV=4 - [MDHC_HUMAN]	44.31	15	15	98	334	36.403	7.35693	0.978623	0.948888	0.972957	0.966823	1.03059	1.01946	1.0153	1.02178	1.05685	0.00572721
A8K4T7	cDNA FLJ77111, highly similar to Homo sapiens microtubule-associated protein 1A (MAP1A), mRNA (Fragment) OS=Homo sapiens PE=2 SV=1 - [A8K4T7_HUMAN]	3	3	3	5	1433	157.157	4.98291	1.03708	1.07539	1.06067	1.05771	0.962701	0.986372	0.938947	0.962673	0.910145	0.00576372
H0YD13	CD44 antigen OS=Homo sapiens GN=CD44 PE=1 SV=2 - [H0YD13_HUMAN]	41.75	8	8	91	206	22.6686	8.19189	1.07602	1.03876	1.06611	1.06029	0.849089	0.926157	0.933773	0.903006	0.851656	0.00578097
O15116	U6 snRNA-associated Sm-like protein LSm1 OS=Homo sapiens GN=LSM1 PE=1 SV=1 - [LSM1_HUMAN]	9.77	2	2	3	133	15.1701	5.22412	0.932555	1.01005	1.0255	0.989368	1.14755	1.136	1.15649	1.14668	1.159	0.00585412
A8K7A0	DNA primase large subunit OS=Homo sapiens PE=2 SV=1 - [A8K7A0_HUMAN]	15.91	7	7	15	509	58.797	7.91357	1.02255	1.07816	1.10167	1.06746	0.931191	0.922148	0.949985	0.934442	0.875384	0.00587356
A6NJ78	Probable methyltransferase-like protein 15 OS=Homo sapiens GN=METTL15 PE=1 SV=1 - [MET15_HUMAN]	16.95	5	5	8	407	46.0916	8.6167	1.04107	1.04232	1.04749	1.04362	0.940492	0.958515	0.887221	0.928743	0.88992	0.0059048
Q7Z426	Putative MAPK activating protein OS=Homo sapiens PE=2 SV=1 - [Q7Z426_HUMAN]	24.75	8	8	22	396	42.98	5.17334	0.942527	0.950665	0.885714	0.926302	1.04634	1.05936	1.02759	1.04443	1.12753	0.00621136
O75223	Gamma-glutamylcyclotransferase OS=Homo sapiens GN=GGCT PE=1 SV=1 - [GGCT_HUMAN]	40.96	7	7	34	188	20.9943	5.13525	0.945951	0.92776	0.898831	0.924181	1.05968	1.02931	1.00644	1.03181	1.11646	0.00645099
E9PP15	Low-density lipoprotein receptor-related protein 8 OS=Homo sapiens GN=LRP8 PE=1 SV=1 - [E9PP15_HUMAN]	5.69	2	3	4	457	50.8814	6.21436	0.967493	0.987166		0.97733	0.852076	0.856233		0.854155	0.873968	0.0065958
Q16698	2,4-dienoyl-CoA reductase, mitochondrial OS=Homo sapiens GN=DECR1 PE=1 SV=1 - [DECR_HUMAN]	37.31	10	10	40	335	36.0448	9.27588	0.970621	0.974478	0.93347	0.959523	1.02698	1.03976	1.05801	1.04158	1.08552	0.00665525
Q96C19	EF-hand domain-containing protein D2 OS=Homo sapiens GN=EFHD2 PE=1 SV=1 - [EFHD2_HUMAN]	44.17	10	11	54	240	26.6805	5.19873	0.976327	0.950955	0.9447	0.957327	1.04729	1.07289	1.02244	1.04754	1.09424	0.00669603
B4DFV7	cDNA FLJ60481 OS=Homo sapiens PE=2 SV=1 - [B4DFV7_HUMAN]	8.33	4	4	5	612	67.2122	5.49072	0.972276	0.97737		0.974823	1.00568	1.00649		1.00609	1.03207	0.00673687
P25490	Transcriptional repressor protein YY1 OS=Homo sapiens GN=YY1 PE=1 SV=2 - [TYY1_HUMAN]	17.87	6	6	14	414	44.6847	6.25244	1.00996	1.05466	1.04949	1.03803	0.970869	0.957775	0.960774	0.963139	0.927849	0.00694459
A0A0A0MTR2	Prolyl 3-hydroxylase OGFOD1 OS=Homo sapiens GN=OGFOD1 PE=1 SV=1 - [A0A0A0MTR2_HUMAN]	18.44	9	9	19	499	58.3417	5.05908	0.950092	0.948106	0.979561	0.959253	1.04058	1.09407	1.0458	1.06015	1.10518	0.00704234
Q9BRQ8	Apoptosis-inducing factor 2 OS=Homo sapiens GN=AIFM2 PE=1 SV=1 - [AIFM2_HUMAN]	7.24	2	2	2	373	40.5013	9.11475		0.949971	0.922081	0.936026		1.09971	1.10047	1.10009	1.17528	0.00715277
P43490	Nicotinamide phosphoribosyltransferase OS=Homo sapiens GN=NAMPT PE=1 SV=1 - [NAMPT_HUMAN]	53.36	21	21	70	491	55.4866	7.15186	0.932946	0.932309	0.967762	0.944339	1.05656	1.0458	1.00905	1.03714	1.09827	0.00747337
H7BYG8	E3 ubiquitin-protein ligase listerin OS=Homo sapiens GN=LTN1 PE=1 SV=1 - [H7BYG8_HUMAN]	3.44	3	3	4	813	91.3464	7.82568	1.03607	1.03021		1.03314	0.971289	0.961152		0.96622	0.935225	0.00756391
P38159	RNA-binding motif protein, X chromosome OS=Homo sapiens GN=RBMX PE=1 SV=3 - [RBMX_HUMAN]	42.46	5	19	110	391	42.3063	10.0522	0.934803	0.952506	0.873066	0.920125	1.03543	1.06287	1.08834	1.06222	1.15443	0.00758214
Q8IZ69	tRNA (uracil-5-)-methyltransferase homolog A OS=Homo sapiens GN=TRMT2A PE=1 SV=2 - [TRM2A_HUMAN]	14.56	6	6	11	625	68.6822	7.94287	0.977167	0.947688	0.955703	0.960186	1.05928	1.01791	1.0285	1.03523	1.07816	0.00785372
Q7L8L6	FAST kinase domain-containing protein 5, mitochondrial OS=Homo sapiens GN=FASTKD5 PE=1 SV=1 - [FAKD5_HUMAN]	3.8	2	2	7	764	86.5186	8.1333	0.955732	1.00657	1.00806	0.990119	1.09806	1.07745	1.1294	1.10164	1.11263	0.00820716
Q9Y2Z4	Tyrosine--tRNA ligase, mitochondrial OS=Homo sapiens GN=YARS2 PE=1 SV=2 - [SYYM_HUMAN]	35.85	13	13	40	477	53.1657	8.98291	1.0273	1.03425	1.01883	1.02679	1.00626	1.00426	1.00092	1.00381	0.977621	0.00823117
A0A024R0Y2	HCG30204, isoform CRA_a OS=Homo sapiens GN=hCG_30204 PE=4 SV=1 - [A0A024R0Y2_HUMAN]	22.53	43	43	109	2268	257.075	6.60986	1.02802	1.0727	1.03869	1.04647	0.968814	0.950911	0.982368	0.967364	0.924408	0.00825555
E9PJH7	Mitochondrial glutamate carrier 1 (Fragment) OS=Homo sapiens GN=SLC25A22 PE=1 SV=5 - [E9PJH7_HUMAN]	17.25	4	4	7	313	33.2606	9.67139	0.974653	1.01043	0.988232	0.991105	1.04342	1.07921	1.07543	1.06602	1.07559	0.00827713
Q9UK76	Hematological and neurological expressed 1 protein OS=Homo sapiens GN=HN1 PE=1 SV=3 - [HN1_HUMAN]	41.56	5	5	12	154	16.0049	5.60498	1.08393	1.04116	1.11233	1.07914	0.937315	0.979053	0.914566	0.943645	0.874441	0.00841308
Q27J81	Inverted formin-2 OS=Homo sapiens GN=INF2 PE=1 SV=2 - [INF2_HUMAN]	18.57	19	19	53	1249	135.54	5.37646	1.03836	1.05037	0.985767	1.02483	0.916144	0.895608	0.933962	0.915238	0.893061	0.00850366
Q68CZ2	Tensin-3 OS=Homo sapiens GN=TNS3 PE=1 SV=2 - [TENS3_HUMAN]	16.68	18	18	49	1445	155.169	6.81494	1.06453	1.02277	1.01426	1.03385	0.899196	0.955465	0.92207	0.925577	0.89527	0.00862874
B2R704	cDNA, FLJ93207, highly similar to Homo sapiens microtubule-associated protein 7 (MAP7), mRNA OS=Homo sapiens PE=2 SV=1 - [B2R704_HUMAN]	11.35	8	8	12	749	83.9324	9.53955	1.05983	1.01282	1.05013	1.04093	0.910945	0.964146	0.946434	0.940508	0.903526	0.00907669
B7ZM10	XPO6 protein OS=Homo sapiens GN=XPO6 PE=2 SV=1 - [B7ZM10_HUMAN]	7.12	7	7	9	1124	128.707	6.30322	1.05933	1.01735	1.09887	1.05852	0.935147	0.956821	0.93455	0.942173	0.890088	0.00917225
P22695	Cytochrome b-c1 complex subunit 2, mitochondrial OS=Homo sapiens GN=UQCRC2 PE=1 SV=3 - [QCR2_HUMAN]	48.12	16	16	88	453	48.4129	8.63135	1.04145	1.0265	1.01767	1.02854	0.958305	0.988947	0.952751	0.966668	0.939844	0.00945266
E9PNW4	CD59 glycoprotein OS=Homo sapiens GN=CD59 PE=1 SV=1 - [E9PNW4_HUMAN]	27.78	3	3	17	108	11.9765	5.74463	0.918778	0.910362	0.891349	0.90683	1.04737	1.06217	0.980417	1.02999	1.13581	0.0095867
P55795	Heterogeneous nuclear ribonucleoprotein H2 OS=Homo sapiens GN=HNRNPH2 PE=1 SV=1 - [HNRH2_HUMAN]	24.72	3	9	97	449	49.2323	6.30322	0.938113	0.988089	0.972572	0.966258	1.0618	1.03049	1.06763	1.05331	1.09009	0.00969073
Q8IWZ3	Ankyrin repeat and KH domain-containing protein 1 OS=Homo sapiens GN=ANKHD1 PE=1 SV=1 - [ANKH1_HUMAN]	9.13	8	16	36	2542	269.291	5.73193	1.06354	1.03262	1.02924	1.0418	0.919492	0.973071	0.961442	0.951335	0.913164	0.00989977
B2RBY4	DNA primase OS=Homo sapiens PE=2 SV=1 - [B2RBY4_HUMAN]	10.95	4	5	7	420	49.9235	8.38232	1.03169	1.08197	1.10526	1.07298	0.972578	0.901541	0.902977	0.925698	0.86274	0.00995926
Q8TD06	Anterior gradient protein 3 OS=Homo sapiens GN=AGR3 PE=1 SV=1 - [AGR3_HUMAN]	52.41	6	7	109	166	19.1589	7.98682	1.07708	1.11301	1.07581	1.08863	0.930681	0.961544	1.01135	0.967858	0.889058	0.0103239
B4DJB4	Isocitrate dehydrogenase [NAD] subunit, mitochondrial OS=Homo sapiens PE=2 SV=1 - [B4DJB4_HUMAN]	39.56	13	13	44	316	34.4834	6.44287	0.96955	0.955827	0.899042	0.941473	1.0399	1.06008	1.03623	1.04541	1.1104	0.0103822
Q6WKZ4	Rab11 family-interacting protein 1 OS=Homo sapiens GN=RAB11FIP1 PE=1 SV=3 - [RFIP1_HUMAN]	7.25	8	8	13	1283	137.083	5.42725	0.945641	0.971452	0.965907	0.961	1.06194	1.07666	1.0159	1.0515	1.09418	0.0104518
O75348	V-type proton ATPase subunit G 1 OS=Homo sapiens GN=ATP6V1G1 PE=1 SV=3 - [VATG1_HUMAN]	31.36	4	4	13	118	13.7491	8.79248	0.965924	0.92799	0.982523	0.958812	1.17914	1.08422	1.08813	1.11717	1.16516	0.0105775
Q96HI4	Glycylpeptide N-tetradecanoyltransferase (Fragment) OS=Homo sapiens GN=NMT1 PE=2 SV=2 - [Q96HI4_HUMAN]	26.32	8	12	75	494	56.5678	7.79639	0.977113	0.957946	0.951981	0.962347	1.03494	1.00181	1.01577	1.01751	1.05732	0.0107568
H3BV79	Hydroxyacylglutathione hydrolase, mitochondrial (Fragment) OS=Homo sapiens GN=HAGH PE=1 SV=1 - [H3BV79_HUMAN]	25	1	1	6	64	7.49577	8.54346	0.935401	0.921778	0.930532	0.929237	1.0229	1.01019	0.971234	1.00144	1.0777	0.0108222
H3BQB1	Adenine phosphoribosyltransferase (Fragment) OS=Homo sapiens GN=APRT PE=1 SV=1 - [H3BQB1_HUMAN]	32.72	6	6	26	162	17.5503	7.50342	1.00603	0.977008	0.962551	0.981865	1.0393	1.05109	1.07327	1.05456	1.07403	0.0109444
Q9Y6G0	RNA-binding protein OS=Homo sapiens PE=2 SV=1 - [Q9Y6G0_HUMAN]	15.58	4	4	5	276	31.5843	9.45166	1.12905	1.04704	1.04249	1.07286	0.866882	0.949122	0.907358	0.907787	0.846135	0.0109482
A8K8U1	cDNA FLJ77762, highly similar to Homo sapiens cullin-associated and neddylation-dissociated 1 (CAND1), mRNA OS=Homo sapiens PE=2 SV=1 - [A8K8U1_HUMAN]	37.4	40	40	273	1230	136.231	5.8335	0.981688	0.968593	0.936309	0.962197	1.01732	1.02964	1.03763	1.0282	1.06859	0.010964
Q9NQP4	Prefoldin subunit 4 OS=Homo sapiens GN=PFDN4 PE=1 SV=1 - [PFD4_HUMAN]	20.9	3	3	5	134	15.3046	4.52588	0.971575	0.968937	0.967187	0.969233	1.03	1.01104	0.99664	1.01256	1.0447	0.0112775
P22314	Ubiquitin-like modifier-activating enzyme 1 OS=Homo sapiens GN=UBA1 PE=1 SV=3 - [UBA1_HUMAN]	41.4	36	36	247	1058	117.774	5.75732	0.975504	0.991139	0.988232	0.984958	1.07197	1.02929	1.03814	1.04647	1.06245	0.0113626
Q9H3K6	BolA-like protein 2 OS=Homo sapiens GN=BOLA2 PE=1 SV=1 - [BOLA2_HUMAN]	59.3	2	4	17	86	10.1102	6.52197	1.05812	1.10919	1.09347	1.08693	0.995674	1.00848	1.02572	1.00996	0.929188	0.0115499
B7Z471	cDNA FLJ54697, highly similar to Tyrosine-protein kinase-like 7 OS=Homo sapiens PE=2 SV=1 - [B7Z471_HUMAN]	7.2	2	2	4	403	44.1661	7.43018	1.06591	1.07125	1.00281	1.04666	0.837964	0.891912	0.935776	0.888551	0.848942	0.0115654
H7C488	Leucine zipper transcription factor-like protein 1 (Fragment) OS=Homo sapiens GN=LZTFL1 PE=1 SV=1 - [H7C488_HUMAN]	19.15	5	5	9	235	26.889	4.98291	0.965086	0.959554	0.98711	0.970583	1.06207	1.05397	1.0154	1.04382	1.07545	0.0117689
Q5QNZ2	ATP synthase F(0) complex subunit B1, mitochondrial OS=Homo sapiens GN=ATP5F1 PE=1 SV=1 - [Q5QNZ2_HUMAN]	37.44	7	7	29	195	22.2608	9.26123	0.994199	0.979897	0.993345	0.989147	1.01327	1.01371	1.02784	1.01827	1.02945	0.0119391
Q6UN15	Pre-mRNA 3'-end-processing factor FIP1 OS=Homo sapiens GN=FIP1L1 PE=1 SV=1 - [FIP1_HUMAN]	15.99	7	7	11	594	66.4865	5.59229	0.981246	0.981176	0.975469	0.979297	1.03541	1.00494	1.0166	1.01899	1.04053	0.011959
Q9HCU5	Prolactin regulatory element-binding protein OS=Homo sapiens GN=PREB PE=1 SV=2 - [PREB_HUMAN]	23.98	7	7	17	417	45.4397	7.88428	0.931425	0.93144	0.958841	0.940569	1.1044	1.03403	1.02752	1.05532	1.122	0.0119639
P62277	40S ribosomal protein S13 OS=Homo sapiens GN=RPS13 PE=1 SV=2 - [RS13_HUMAN]	45.03	8	8	66	151	17.2117	10.5356	1.08126	1.06284	1.03491	1.05967	0.868895	0.910263	0.971482	0.91688	0.86525	0.0120029
Q99497	Protein deglycase DJ-1 OS=Homo sapiens GN=PARK7 PE=1 SV=2 - [PARK7_HUMAN]	50.26	10	10	76	189	19.8785	6.78564	0.965779	0.960271	0.938279	0.954777	1.0603	1.04109	1.00431	1.03523	1.08427	0.0120518
Q6NUR1	Non-SMC condensin I complex, subunit G OS=Homo sapiens GN=NCAPG PE=2 SV=1 - [Q6NUR1_HUMAN]	17.44	15	15	31	1015	114.122	5.66846	1.03056	1.03778	1.04622	1.03819	0.919236	0.984176	0.958204	0.953872	0.918786	0.0122087
C9JEV9	Cleavage and polyadenylation-specificity factor subunit 4 OS=Homo sapiens GN=CPSF4 PE=1 SV=1 - [C9JEV9_HUMAN]	24.17	3	3	4	211	23.6375	8.47021	1.02606	1.04287	1.0587	1.04254	0.883903	0.971125	0.921222	0.925416	0.887652	0.0122211
Q9H857	5'-nucleotidase domain-containing protein 2 OS=Homo sapiens GN=NT5DC2 PE=1 SV=1 - [NT5D2_HUMAN]	16.35	8	8	14	520	60.6797	6.771	1.04679	1.1085	1.13454	1.09661	0.899351	0.940084	0.984754	0.941396	0.858462	0.0123549
B4E0H8	cDNA FLJ60385, highly similar to Integrin alpha-3 OS=Homo sapiens PE=2 SV=1 - [B4E0H8_HUMAN]	6.94	6	6	10	1037	115.094	6.56592	1.05329	1.12288	1.11124	1.09581	0.998981	0.907354	0.921782	0.942706	0.860286	0.0127221
P61981	14-3-3 protein gamma OS=Homo sapiens GN=YWHAG PE=1 SV=2 - [1433G_HUMAN]	48.58	7	12	220	247	28.2849	4.89404	0.937511	0.914939	0.902834	0.918428	0.970225	1.01802	1.02572	1.00466	1.09389	0.0127768
Q9Y678	Coatomer subunit gamma-1 OS=Homo sapiens GN=COPG1 PE=1 SV=1 - [COPG1_HUMAN]	49.43	32	36	156	874	97.6555	5.46533	0.969215	0.957383	0.967753	0.964784	1.04227	1.02196	0.998678	1.02097	1.05824	0.0128651
F8W7C6	60S ribosomal protein L10 OS=Homo sapiens GN=RPL10 PE=1 SV=2 - [F8W7C6_HUMAN]	53.99	1	8	58	163	18.5527	9.94971	1.06052	1.15311	1.08224	1.09862	0.992767	0.942385	0.954187	0.963113	0.876654	0.0130775
P16930	Fumarylacetoacetase OS=Homo sapiens GN=FAH PE=1 SV=2 - [FAAA_HUMAN]	15.51	6	6	18	419	46.3442	6.94678	0.953222	0.964964	0.878565	0.932251	1.05468	1.04033	1.05143	1.04882	1.12504	0.0131173
A8K4P8	cDNA FLJ75337 OS=Homo sapiens PE=2 SV=1 - [A8K4P8_HUMAN]	3.41	4	4	6	1524	170.406	7.31299	1.0381	1.04124	1.0617	1.04702	0.985622	0.97721	0.927181	0.963338	0.92008	0.0131486
Q53RD8	Putative uncharacterized protein LOC84524 (Fragment) OS=Homo sapiens GN=LOC84524 PE=4 SV=1 - [Q53RD8_HUMAN]	3.38	1	1	2	266	30.7932	8.47021		0.892792	0.88008	0.886436		0.995487	1.02065	1.00807	1.13722	0.0131678
I3L3T4	TOM1-like protein 1 OS=Homo sapiens GN=TOM1L1 PE=1 SV=1 - [I3L3T4_HUMAN]	34.67	6	7	7	225	25.2372	7.35693	1.08889	1.06927	1.14596	1.10137	0.896445	0.996316	0.895622	0.929461	0.84391	0.0132979
P08758	Annexin A5 OS=Homo sapiens GN=ANXA5 PE=1 SV=2 - [ANXA5_HUMAN]	65	18	20	144	320	35.9144	5.04639	0.981888	0.988473	0.971861	0.980741	1.06564	1.02397	1.08291	1.05751	1.07827	0.0133718
Q8N6N3	UPF0690 protein C1orf52 OS=Homo sapiens GN=C1orf52 PE=1 SV=1 - [CA052_HUMAN]	10.44	2	2	3	182	20.5862	5.21143	0.953351		0.966114	0.959733	1.16463		1.12345	1.14404	1.19204	0.0134029
P00390	Glutathione reductase, mitochondrial OS=Homo sapiens GN=GSR PE=1 SV=2 - [GSHR_HUMAN]	33.91	13	13	54	522	56.221	8.49951	0.940983	0.92144	0.946868	0.93643	1.06494	1.00437	1.0074	1.02557	1.09519	0.0135378
G5E9Z2	Cisplatin resistance related protein CRR9p, isoform CRA_c OS=Homo sapiens GN=CLPTM1L PE=1 SV=1 - [G5E9Z2_HUMAN]	17.89	6	6	12	369	43.2522	8.79248	0.995697	1.04904	1.03373	1.02616	0.941275	0.93516	0.967633	0.948023	0.923858	0.0140075
B2RE36	cDNA, FLJ96903 OS=Homo sapiens PE=2 SV=1 - [B2RE36_HUMAN]	9.06	3	3	6	254	29.4441	7.06396	0.943474	0.965715	0.883425	0.930871	1.08037	1.0991	1.02561	1.06836	1.1477	0.0140987
A6QKW0	SHINC3 OS=Homo sapiens GN=SHINC3 PE=2 SV=1 - [A6QKW0_HUMAN]	30.77	7	7	20	247	27.9328	9.70068	0.976724	0.988026	0.975423	0.980057	1.06582	1.07676	1.1562	1.09959	1.12197	0.0141886
O75962	Triple functional domain protein OS=Homo sapiens GN=TRIO PE=1 SV=2 - [TRIO_HUMAN]	3.78	11	11	18	3097	346.683	6.3667	1.01709	1.05448	1.05775	1.04311	0.982331	0.922534	0.955917	0.953594	0.914186	0.0144803
P07942	Laminin subunit beta-1 OS=Homo sapiens GN=LAMB1 PE=1 SV=2 - [LAMB1_HUMAN]	1.57	2	2	2	1786	197.909	4.94482		1.06448	1.09402	1.07925		0.951903	0.95827	0.955087	0.884958	0.0144867
Q5SRE5	Nucleoporin NUP188 homolog OS=Homo sapiens GN=NUP188 PE=1 SV=1 - [NU188_HUMAN]	8.23	12	12	18	1749	195.917	6.72705	1.04888	1.06951	1.08266	1.06702	1.0248	0.979838	0.988081	0.997574	0.934915	0.0149181
P12532	Creatine kinase U-type, mitochondrial OS=Homo sapiens GN=CKMT1A PE=1 SV=1 - [KCRU_HUMAN]	25.42	9	9	32	417	47.0072	8.33838	1.0286	1.06956	1.04637	1.04818	0.948305	0.916462	0.988032	0.950933	0.907227	0.0151517
B6VEX5	Abl-interactor 1 variant 72 OS=Homo sapiens PE=2 SV=1 - [B6VEX5_HUMAN]	19.85	4	6	26	388	42.6113	6.03662	0.956159	0.924324	0.963473	0.947985	1.08981	1.01202	1.08836	1.0634	1.12175	0.0152372
O75643	U5 small nuclear ribonucleoprotein 200 kDa helicase OS=Homo sapiens GN=SNRNP200 PE=1 SV=2 - [U520_HUMAN]	33.75	66	66	252	2136	244.353	6.06201	1.03646	1.0171	1.05494	1.03617	0.927881	0.981588	0.964508	0.957992	0.924554	0.0153172
P60866	40S ribosomal protein S20 OS=Homo sapiens GN=RPS20 PE=1 SV=1 - [RS20_HUMAN]	26.89	4	4	47	119	13.3643	9.93506	1.04503	1.0612	0.995713	1.03398	0.881429	0.871537	0.953694	0.90222	0.872571	0.0154756
P09110	3-ketoacyl-CoA thiolase, peroxisomal OS=Homo sapiens GN=ACAA1 PE=1 SV=2 - [THIK_HUMAN]	43.16	13	13	42	424	44.2639	8.44092	0.952632	0.999588	0.987331	0.97985	1.04263	1.05093	1.08902	1.06086	1.08268	0.0155841
H0Y7N4	Dedicator of cytokinesis protein 5 (Fragment) OS=Homo sapiens GN=DOCK5 PE=1 SV=1 - [H0Y7N4_HUMAN]	1.1	1	1	2	1090	126.044	7.78174		1.04804	1.04554	1.04679		0.98027	0.961147	0.970708	0.927318	0.0156878
Q6Y1H2	Very-long-chain (3R)-3-hydroxyacyl-CoA dehydratase 2 OS=Homo sapiens GN=HACD2 PE=1 SV=1 - [HACD2_HUMAN]	16.14	4	4	9	254	28.3501	9.5542	1.06504	1.00085	1.0205	1.0288	0.91578	0.957538	0.941006	0.938108	0.91185	0.0158189
Q9NRV9	Heme-binding protein 1 OS=Homo sapiens GN=HEBP1 PE=1 SV=1 - [HEBP1_HUMAN]	21.69	3	3	12	189	21.0835	5.79541	0.955467	0.906153	0.892147	0.917922	1.05133	1.03225	0.989257	1.02428	1.11587	0.0160823
V9HW35	Epididymis secretory protein Li 55 OS=Homo sapiens GN=HEL-S-55 PE=2 SV=1 - [V9HW35_HUMAN]	59.26	8	8	73	162	17.02	7.23975	0.949973	0.955306	1.00102	0.968765	1.08005	1.02913	1.05977	1.05632	1.09037	0.0162649
B4DXX1	cDNA FLJ56040 OS=Homo sapiens PE=2 SV=1 - [B4DXX1_HUMAN]	11.44	5	5	9	577	64.9918	8.47021	1.06194	1.07968	1.03681	1.05948	0.961717	0.979947	1.01058	0.98408	0.928835	0.016323
P54920	Alpha-soluble NSF attachment protein OS=Homo sapiens GN=NAPA PE=1 SV=3 - [SNAA_HUMAN]	60.68	14	14	29	295	33.2113	5.36377	0.970626	1.0093	0.983184	0.987703	1.02919	1.0479	1.03662	1.0379	1.05082	0.016442
P61966	AP-1 complex subunit sigma-1A OS=Homo sapiens GN=AP1S1 PE=1 SV=1 - [AP1S1_HUMAN]	19.62	3	3	4	158	18.7206	5.73193	1.06051	1.04587		1.05319	0.908056	0.938711		0.923384	0.876747	0.016694
P61081	NEDD8-conjugating enzyme Ubc12 OS=Homo sapiens GN=UBE2M PE=1 SV=1 - [UBC12_HUMAN]	46.99	8	8	24	183	20.8866	7.69385	0.995296	0.955132	0.953818	0.968082	1.02029	1.0496	1.02711	1.03233	1.06637	0.0167249
Q53F88	General transcription factor IIE, polypeptide 1 (Alpha subunit, 56kD) variant (Fragment) OS=Homo sapiens PE=2 SV=1 - [Q53F88_HUMAN]	7.56	3	3	7	357	40.0928	5.26221	1.0012	0.927539	0.957833	0.96219	1.06776	1.07911	1.03522	1.0607	1.10238	0.0171763
B4DKE6	cDNA FLJ60629, highly similar to Replication factor C subunit 3 OS=Homo sapiens PE=2 SV=1 - [B4DKE6_HUMAN]	31.8	8	8	26	305	34.8101	8.5874	1.00681	0.999508	1.01908	1.00847	0.967728	0.965376	0.928341	0.953815	0.945808	0.017387
P18859	ATP synthase-coupling factor 6, mitochondrial OS=Homo sapiens GN=ATP5J PE=1 SV=1 - [ATP5J_HUMAN]	51.85	6	6	22	108	12.5796	9.5249	0.991727	0.965934	0.889734	0.949132	1.07177	1.08681	1.0595	1.07269	1.13018	0.0174291
A0A024R9U8	HECT, UBA and WWE domain containing 1, isoform CRA_c OS=Homo sapiens GN=HUWE1 PE=4 SV=1 - [A0A024R9U8_HUMAN]	14.36	51	51	133	4365	480.716	5.21143	0.996627	1.04722	1.03202	1.02529	0.948774	0.914168	0.965029	0.942657	0.919407	0.0175822
C9JZB0	Inositol polyphosphate 5-phosphatase K (Fragment) OS=Homo sapiens GN=INPP5K PE=1 SV=1 - [C9JZB0_HUMAN]	4.37	1	1	3	229	26.7065	8.30908	1.00957	0.914331	0.898936	0.940944	1.06714	1.07705	1.09034	1.07818	1.14585	0.0176335
P02786	Transferrin receptor protein 1 OS=Homo sapiens GN=TFRC PE=1 SV=2 - [TFR1_HUMAN]	47.89	33	33	183	760	84.8179	6.60986	1.04329	1.09199	1.09758	1.07762	0.901007	0.916166	1.00141	0.939526	0.871854	0.0180036
P37837	Transaldolase OS=Homo sapiens GN=TALDO1 PE=1 SV=2 - [TALDO_HUMAN]	49.85	20	20	117	337	37.5165	6.81494	0.956695	0.953531	0.972162	0.960796	1.07503	1.01481	1.02198	1.03727	1.0796	0.0182426
P11274	Breakpoint cluster region protein OS=Homo sapiens GN=BCR PE=1 SV=2 - [BCR_HUMAN]	4.01	2	4	8	1271	142.73	7.03467	1.02252	1.0626	1.05909	1.04807	0.99194	0.91608	0.933501	0.947174	0.903733	0.0184685
Q16513	Serine/threonine-protein kinase N2 OS=Homo sapiens GN=PKN2 PE=1 SV=1 - [PKN2_HUMAN]	25.71	19	20	39	984	111.964	6.30322	1.03183	0.990922	1.0778	1.03352	0.945057	0.933294	0.929333	0.935894	0.905541	0.0187281
Q6PJG6	BRCA1-associated ATM activator 1 OS=Homo sapiens GN=BRAT1 PE=1 SV=2 - [BRAT1_HUMAN]	10.23	6	6	12	821	88.0629	5.2749	1.05798	1.12375	1.08284	1.08819	0.980959	0.927208	1.00776	0.971977	0.893205	0.0188782
B3KT81	cDNA FLJ37836 fis, clone BRSSN2010587, weakly similar to Homo sapiens MDN1, midasin homolog (yeast) (MDN1), mRNA OS=Homo sapiens PE=2 SV=1 - [B3KT81_HUMAN]	7.76	8	8	15	1018	114.705	7.6499	1.02819	1.0432	1.06303	1.04481	0.97246	0.93252	0.994018	0.966333	0.924892	0.0190973
P18124	60S ribosomal protein L7 OS=Homo sapiens GN=RPL7 PE=1 SV=1 - [RL7_HUMAN]	43.55	16	17	116	248	29.2072	10.6528	1.07157	1.09212	1.03848	1.06739	0.859181	0.873923	0.984457	0.905854	0.848664	0.0191006
P46013	Proliferation marker protein Ki-67 OS=Homo sapiens GN=MKI67 PE=1 SV=2 - [KI67_HUMAN]	27.36	64	64	154	3256	358.474	9.45166	1.10639	1.15184	1.19254	1.15026	0.931015	1.051	0.928527	0.97018	0.843446	0.0192
P00491	Purine nucleoside phosphorylase OS=Homo sapiens GN=PNP PE=1 SV=2 - [PNPH_HUMAN]	59.52	15	15	100	289	32.0972	6.94678	0.977261	0.964058	0.963579	0.968299	1.00187	1.05298	1.05621	1.03702	1.07097	0.0193753
A0A0A0MS41	Sideroflexin OS=Homo sapiens GN=SFXN3 PE=1 SV=1 - [A0A0A0MS41_HUMAN]	22.74	4	5	13	321	35.4805	9.1001	0.994025	0.952388	0.993212	0.979875	1.08639	1.11127	1.03632	1.07799	1.10013	0.0194769
B3KPT0	cDNA FLJ32143 fis, clone PLACE5000080, highly similar to Absent in melanoma 1 protein (Fragment) OS=Homo sapiens PE=2 SV=1 - [B3KPT0_HUMAN]	11.34	8	8	15	926	98.5615	7.59131	1.0603	1.04949	1.091	1.06693	1.00479	0.911102	0.944274	0.953388	0.89358	0.0195948
Q9NY33	Dipeptidyl peptidase 3 OS=Homo sapiens GN=DPP3 PE=1 SV=2 - [DPP3_HUMAN]	32.43	19	19	80	737	82.5378	5.09717	0.963547	0.974379	0.95906	0.965662	1.06211	1.03182	1.00278	1.03224	1.06894	0.0198312
P57740	Nuclear pore complex protein Nup107 OS=Homo sapiens GN=NUP107 PE=1 SV=1 - [NU107_HUMAN]	11.68	10	10	17	925	106.307	5.42725	1.02329	1.02231	1.01406	1.01989	0.940867	0.991315	0.951988	0.96139	0.942645	0.0198684
Q53LP3	Ankyrin repeat domain-containing protein SOWAHC OS=Homo sapiens GN=SOWAHC PE=1 SV=1 - [SWAHC_HUMAN]	39.05	16	16	36	525	55.6381	7.03467	0.975643	0.931603	0.855011	0.920752	1.04205	1.07771	1.05496	1.05824	1.14932	0.0201063
Q12996	Cleavage stimulation factor subunit 3 OS=Homo sapiens GN=CSTF3 PE=1 SV=1 - [CSTF3_HUMAN]	19.53	12	12	36	717	82.8687	8.11865	0.9885	0.959702	0.915593	0.954598	1.02568	1.08258	1.05655	1.05494	1.10511	0.0201265
A0A0S2Z5K3	DCP1 decapping enzyme-like protein A isoform 3 (Fragment) OS=Homo sapiens GN=DCP1A PE=2 SV=1 - [A0A0S2Z5K3_HUMAN]	21.06	8	8	20	546	59.4515	6.63916	0.960636	0.994643	0.964839	0.973372	1.0575	1.012	1.0548	1.04143	1.06992	0.0201787
O14737	Programmed cell death protein 5 OS=Homo sapiens GN=PDCD5 PE=1 SV=3 - [PDCD5_HUMAN]	58.4	7	7	43	125	14.2763	6.03662	0.960373	0.98415	0.995297	0.97994	1.03538	1.01345	1.04285	1.03056	1.05166	0.020245
Q9NR09	Baculoviral IAP repeat-containing protein 6 OS=Homo sapiens GN=BIRC6 PE=1 SV=2 - [BIRC6_HUMAN]	3.34	13	13	21	4857	529.919	6.04932	1.00904	1.04945	1.15185	1.07011	0.916004	0.873322	0.919194	0.90284	0.843686	0.0205229
Q9Y5S2	Serine/threonine-protein kinase MRCK beta OS=Homo sapiens GN=CDC42BPB PE=1 SV=2 - [MRCKB_HUMAN]	3.33	4	5	8	1711	194.193	6.3667	1.01027	1.00059	1.02029	1.01038	0.990727	0.969435	0.968728	0.976297	0.966263	0.02067
B4DKM6	cDNA FLJ54305, highly similar to Serum paraoxonase/arylesterase 2 (EC 3.1.1.2) OS=Homo sapiens PE=2 SV=1 - [B4DKM6_HUMAN]	17.36	1	5	12	363	40.0026	5.73193	0.966254		0.949673	0.957963	1.11752		1.07986	1.09869	1.1469	0.0207178
Q7RTQ9	Kinesin light chain 1A OS=Homo sapiens GN=KNS2 PE=2 SV=1 - [Q7RTQ9_HUMAN]	36.06	11	18	41	538	61.164	5.75732	1.01896	1.0021	0.982203	1.00109	0.953839	0.937059	0.964739	0.951879	0.950844	0.0209877
Q2VPK5	Cytoplasmic tRNA 2-thiolation protein 2 OS=Homo sapiens GN=CTU2 PE=1 SV=1 - [CTU2_HUMAN]	5.05	2	2	7	515	56.071	6.31592	1.09842	1.02904	1.00842	1.04529	0.93514	0.917018	0.956896	0.936351	0.895778	0.0211104
P67775	Serine/threonine-protein phosphatase 2A catalytic subunit alpha isoform OS=Homo sapiens GN=PPP2CA PE=1 SV=1 - [PP2AA_HUMAN]	49.51	10	11	40	309	35.5714	5.5415	0.974832	0.95817	0.945269	0.959424	0.987577	1.00125	1.01221	1.00035	1.04265	0.021301
B4DM33	cDNA FLJ52068, highly similar to Microtubule-associated protein RP/EB family member 1 OS=Homo sapiens PE=2 SV=1 - [B4DM33_HUMAN]	42.02	10	10	35	238	26.5656	5.2876	0.928902	0.966268	0.940616	0.945262	1.08776	1.01756	1.01685	1.04072	1.10099	0.0213042
P00568	Adenylate kinase isoenzyme 1 OS=Homo sapiens GN=AK1 PE=1 SV=3 - [KAD1_HUMAN]	48.97	10	10	24	194	21.6213	8.63135	0.905867	0.915204	0.96196	0.927677	1.11358	1.04276	1.01123	1.05586	1.13817	0.0213051
Q9BRF8	Serine/threonine-protein phosphatase CPPED1 OS=Homo sapiens GN=CPPED1 PE=1 SV=3 - [CPPED_HUMAN]	13.69	4	4	6	314	35.5259	6.20166	0.961908	0.97239	0.979951	0.971416	1.01434	1.04493	1.08381	1.04769	1.07852	0.0213455
B4DQX8	cDNA FLJ51723, highly similar to DCC-interacting protein 13 alpha (Fragment) OS=Homo sapiens PE=2 SV=1 - [B4DQX8_HUMAN]	9.64	4	4	9	633	71.2944	5.79541	1.02027	1.04449	1.03748	1.03408	0.995421	0.967923	0.936934	0.966759	0.934896	0.0214602
Q9BQQ5	Ribosomal protein L27a OS=Homo sapiens GN=L27a PE=4 SV=1 - [Q9BQQ5_HUMAN]	38.68	5	5	45	106	12.0074	11.4585	1.05004	1.08661	1.01816	1.0516	0.865466	0.899461	0.974651	0.913193	0.868382	0.0216175
B3KM81	cDNA FLJ10471 fis, clone NT2RP2000045, highly similar to DnaJ homolog subfamily A member 3, mitochondrial OS=Homo sapiens PE=2 SV=1 - [B3KM81_HUMAN]	11.26	4	4	13	453	49.5521	9.34912	1.05019	0.989823	1.09736	1.04579	0.934428	0.86226	0.923193	0.906627	0.866927	0.0221943
P36952	Serpin B5 OS=Homo sapiens GN=SERPINB5 PE=1 SV=2 - [SPB5_HUMAN]	58.67	6	19	137	375	42.0734	6.04932	0.955529	0.927663	0.990737	0.957977	1.10174	1.03786	1.03849	1.05936	1.10583	0.0222464
A0A0M4G3H8	Amylo-alpha-1, 6-glucosidase, 4-alpha-glucanotransferaseprovided OS=Homo sapiens GN=AGL PE=4 SV=1 - [A0A0M4G3H8_HUMAN]	4.96	7	7	12	1532	174.707	6.80029	1.02532	1.07504	1.04958	1.04998	0.993187	0.918052	0.95694	0.95606	0.91055	0.0225471
R4GNG8	Zinc finger matrin-type protein 2 (Fragment) OS=Homo sapiens GN=ZMAT2 PE=1 SV=1 - [R4GNG8_HUMAN]	16.28	2	2	5	129	14.8555	8.99756	0.990566	1.0394	1.01167	1.01388	0.939171	0.930213	0.970318	0.946567	0.933608	0.0225575
P31431	Syndecan-4 OS=Homo sapiens GN=SDC4 PE=1 SV=2 - [SDC4_HUMAN]	13.13	2	2	4	198	21.628	4.50049	1.02095	0.961003	0.967322	0.983091	0.914779	0.90711	0.867491	0.89646	0.911879	0.0225839
P49841	Glycogen synthase kinase-3 beta OS=Homo sapiens GN=GSK3B PE=1 SV=2 - [GSK3B_HUMAN]	21.43	3	6	18	420	46.7149	8.77783	1.04074	1.04834	0.993087	1.02739	0.963004	0.876029	0.872698	0.90391	0.879813	0.0226477
P31040	Succinate dehydrogenase [ubiquinone] flavoprotein subunit, mitochondrial OS=Homo sapiens GN=SDHA PE=1 SV=2 - [SDHA_HUMAN]	37.65	19	19	65	664	72.6453	7.38623	1.02558	1.01614	1.00107	1.01426	0.93851	0.982376	0.964277	0.961721	0.948199	0.0227448
Q5JRC6	PHD finger protein 6 OS=Homo sapiens GN=PHF6 PE=1 SV=1 - [Q5JRC6_HUMAN]	8.33	2	2	7	324	36.4067	9.02686	0.885551	0.952443	0.841979	0.893325	0.990999	1.04111	1.06073	1.03095	1.15406	0.0227976
Q9Y399	28S ribosomal protein S2, mitochondrial OS=Homo sapiens GN=MRPS2 PE=1 SV=1 - [RT02_HUMAN]	20.61	6	6	10	296	33.2281	9.26123	1.0735	1.02752	1.07831	1.05978	0.927587	1.0034	0.93548	0.95549	0.901595	0.0228441
E7EWD6	Putative Polycomb group protein ASXL2 OS=Homo sapiens GN=ASXL2 PE=1 SV=1 - [E7EWD6_HUMAN]	0.71	1	1	3	1407	150.373	8.52881	0.999665	1.06981	1.13387	1.06778	0.866216	0.925355	0.934886	0.908819	0.851129	0.0230098
B3KQT6	cDNA PSEC0169 fis, clone PLACE1011360, highly similar to Tetraspanin-13 OS=Homo sapiens PE=2 SV=1 - [B3KQT6_HUMAN]	8.82	3	3	6	204	22.0725	7.92822	1.10757	1.13105	1.05422	1.09761	0.875679	1.00934	0.919233	0.934752	0.851622	0.0231001
P17275	Transcription factor jun-B OS=Homo sapiens GN=JUNB PE=1 SV=1 - [JUNB_HUMAN]	6.92	2	2	4	347	35.8572	9.21729	0.991754	0.898203	0.88303	0.924329	1.06087	1.10031	1.03274	1.06464	1.1518	0.0232566
Q96QR8	Transcriptional activator protein Pur-beta OS=Homo sapiens GN=PURB PE=1 SV=3 - [PURB_HUMAN]	20.19	6	6	16	312	33.2205	5.42725	0.919889	0.897041	0.906245	0.907725	0.987541	1.13357	1.0579	1.05967	1.16739	0.0235891
Q8NEX1	Ells2 (Fragment) OS=Homo sapiens PE=2 SV=1 - [Q8NEX1_HUMAN]	7.78	1	1	2	180	18.8091	6.26514		1.04027	1.0372	1.03874		0.994625	0.978471	0.986548	0.949757	0.0239288
P05198	Eukaryotic translation initiation factor 2 subunit 1 OS=Homo sapiens GN=EIF2S1 PE=1 SV=3 - [IF2A_HUMAN]	51.75	16	16	90	315	36.0894	5.08447	0.98271	0.987556	0.968776	0.979681	1.0159	1.07862	1.04614	1.04689	1.0686	0.0239334
O14672	Disintegrin and metalloproteinase domain-containing protein 10 OS=Homo sapiens GN=ADAM10 PE=1 SV=1 - [ADA10_HUMAN]	28.88	16	16	42	748	84.0877	7.76709	0.983848	1.05231	1.08531	1.04049	0.95014	0.908281	0.88208	0.9135	0.877953	0.023976
A0A140T9R1	Flotillin-1 (Fragment) OS=Homo sapiens GN=FLOT1 PE=1 SV=1 - [A0A140T9R1_HUMAN]	14.85	4	4	11	357	39.7527	6.3667	0.997238	0.953424	0.974793	0.975152	1.04246	1.05476	1.01399	1.03707	1.0635	0.0239912
F8W0Q9	Periphilin-1 OS=Homo sapiens GN=PPHLN1 PE=1 SV=1 - [F8W0Q9_HUMAN]	12.21	5	5	11	385	44.6559	8.27979	1.03731	1.00743	1.00652	1.01708	0.949554	0.967125	0.902142	0.939607	0.923824	0.024006
B4DQ79	Tyrosine-protein kinase OS=Homo sapiens PE=2 SV=1 - [B4DQ79_HUMAN]	10.87	2	5	13	423	48.5297	7.35693	1.00157		0.969336	0.985453	0.884812		0.881203	0.883007	0.896042	0.0241574
Q08257	Quinone oxidoreductase OS=Homo sapiens GN=CRYZ PE=1 SV=1 - [QOR_HUMAN]	36.47	11	11	40	329	35.1845	8.44092	0.976426	0.969172	0.944964	0.963521	1.01899	1.0194	0.99181	1.01007	1.04831	0.024219
B4DQG4	cDNA FLJ55138, highly similar to Ras-related GTP-binding protein C OS=Homo sapiens PE=2 SV=1 - [B4DQG4_HUMAN]	1.92	1	1	3	365	40.2038	5.07178	0.879626	0.98015	0.961019	0.940265	1.04435	1.08757	1.15311	1.09501	1.16458	0.0247845
Q9Y3E5	Peptidyl-tRNA hydrolase 2, mitochondrial OS=Homo sapiens GN=PTRH2 PE=1 SV=1 - [PTH2_HUMAN]	42.46	6	6	23	179	19.181	8.73389	1.02789	1.07941	1.03655	1.04795	0.955381	0.953132	1.00103	0.969846	0.925469	0.02483
Q9HAB8	Phosphopantothenate--cysteine ligase OS=Homo sapiens GN=PPCS PE=1 SV=2 - [PPCS_HUMAN]	14.47	5	5	8	311	33.9838	6.7124	0.93777	0.989667	0.961766	0.963068	1.01945	1.04526	1.013	1.0259	1.06524	0.0248621
P23229	Integrin alpha-6 OS=Homo sapiens GN=ITGA6 PE=1 SV=5 - [ITA6_HUMAN]	30.27	29	29	81	1130	126.526	6.60986	1.0154	1.10603	1.1193	1.08024	0.948297	0.835787	0.9429	0.908995	0.841472	0.0251311
O95295	SNARE-associated protein Snapin OS=Homo sapiens GN=SNAPIN PE=1 SV=1 - [SNAPN_HUMAN]	17.65	2	2	5	136	14.8649	9.30518	1.03344		1.02552	1.02948	0.944809		0.967232	0.956021	0.928646	0.0252192
O60361	Putative nucleoside diphosphate kinase OS=Homo sapiens GN=NME2P1 PE=5 SV=1 - [NDK8_HUMAN]	66.42	1	8	148	137	15.519	8.57275	1.01712	0.917	0.937575	0.957232	1.10474	1.0654	1.05631	1.07548	1.12354	0.025285
Q9NRF8	CTP synthase 2 OS=Homo sapiens GN=CTPS2 PE=1 SV=1 - [PYRG2_HUMAN]	26.96	10	14	34	586	65.6358	6.90283	0.959411	0.932002	1.01074	0.967385	1.04906	1.05552	1.042	1.04886	1.08422	0.0253298
O95831	Apoptosis-inducing factor 1, mitochondrial OS=Homo sapiens GN=AIFM1 PE=1 SV=1 - [AIFM1_HUMAN]	33.93	16	16	55	613	66.8589	8.95361	0.984912	0.972319	0.980344	0.979192	1.01924	1.04652	1.00491	1.02356	1.04531	0.0253412
A0A024R3R5	Lamin B receptor, isoform CRA_a OS=Homo sapiens GN=LBR PE=4 SV=1 - [A0A024R3R5_HUMAN]	8.62	5	5	14	615	70.685	9.36377	1.04795	1.00831	1.04954	1.03527	0.894449	0.982711	0.926232	0.934464	0.902631	0.0257786
D6R9D6	RNA-binding protein 47 OS=Homo sapiens GN=RBM47 PE=1 SV=1 - [D6R9D6_HUMAN]	41.22	12	12	30	393	43.9589	6.31592	0.988805	0.978335	0.986941	0.984694	0.96031	0.967253	0.973885	0.96715	0.982183	0.0258911
P36543	V-type proton ATPase subunit E 1 OS=Homo sapiens GN=ATP6V1E1 PE=1 SV=1 - [VATE1_HUMAN]	35.4	9	9	37	226	26.1288	8.00146	0.993309	0.943647	0.918797	0.951917	1.06438	1.0405	1.01763	1.04084	1.09341	0.0259078
Q15181	Inorganic pyrophosphatase OS=Homo sapiens GN=PPA1 PE=1 SV=2 - [IPYR_HUMAN]	64.01	15	16	106	289	32.6392	5.85889	0.922372	0.95926	0.992431	0.958021	1.06609	1.04114	1.01914	1.04213	1.08779	0.0259885
A8KA74	cDNA FLJ76065 OS=Homo sapiens PE=2 SV=1 - [A8KA74_HUMAN]	16.34	13	13	18	857	97.6093	7.69385	1.07659	1.12004	1.0664	1.08768	0.901877	0.822966	0.995304	0.906716	0.833626	0.0260561
Q7Z6J9	tRNA-splicing endonuclease subunit Sen54 OS=Homo sapiens GN=TSEN54 PE=1 SV=3 - [SEN54_HUMAN]	4.75	2	2	2	526	58.7828	7.91357	1.03259		1.04979	1.04119	0.927441		0.955456	0.941449	0.904205	0.0261059
A0A024R4E5	High density lipoprotein binding protein (Vigilin), isoform CRA_a OS=Homo sapiens GN=HDLBP PE=1 SV=1 - [A0A024R4E5_HUMAN]	33.36	38	38	121	1268	141.352	6.87354	1.00518	1.03347	1.11454	1.05106	0.955034	0.912437	0.881554	0.916342	0.871823	0.0261296
Q5T6V5	UPF0553 protein C9orf64 OS=Homo sapiens GN=C9orf64 PE=1 SV=1 - [CI064_HUMAN]	27.86	9	9	20	341	39.0038	5.88428	0.980083	0.982063	0.996283	0.986143	1.02024	1.03719	1.07435	1.04393	1.0586	0.0261813
Q96GK7	Fumarylacetoacetate hydrolase domain-containing protein 2A OS=Homo sapiens GN=FAHD2A PE=1 SV=1 - [FAH2A_HUMAN]	33.44	8	8	28	314	34.5741	8.23584	0.950701	0.983724	0.971377	0.968601	1.05133	1.0387	1.00097	1.03033	1.06373	0.0262503
H0YMT3	WD repeat-containing protein 73 (Fragment) OS=Homo sapiens GN=WDR73 PE=1 SV=1 - [H0YMT3_HUMAN]	17.42	2	2	9	178	20.0505	6.53662	0.923226	1.00138	0.959714	0.961439	1.05941	1.04127	1.11855	1.07308	1.11611	0.0263326
P62888	60S ribosomal protein L30 OS=Homo sapiens GN=RPL30 PE=1 SV=2 - [RL30_HUMAN]	72.17	9	9	69	115	12.7757	9.62744	1.06898	1.05714	1.01534	1.04715	0.849101	0.872733	0.978019	0.899951	0.859426	0.0263779
Q96KB5	Lymphokine-activated killer T-cell-originated protein kinase OS=Homo sapiens GN=PBK PE=1 SV=3 - [TOPK_HUMAN]	22.67	6	6	16	322	36.062	5.12256	1.04083	1.02455	1.04768	1.03769	0.980351	1.00798	0.956091	0.981472	0.945826	0.0270195
Q86SX6	Glutaredoxin-related protein 5, mitochondrial OS=Homo sapiens GN=GLRX5 PE=1 SV=2 - [GLRX5_HUMAN]	31.85	4	4	17	157	16.6175	6.78564	0.978921	0.981561	0.974525	0.978336	1.07082	1.02133	1.01827	1.03681	1.05977	0.0270484
Q96CN7	Isochorismatase domain-containing protein 1 OS=Homo sapiens GN=ISOC1 PE=1 SV=3 - [ISOC1_HUMAN]	28.52	7	7	35	298	32.2161	7.38623	1.00052	0.992405	0.96812	0.987016	1.01522	1.04881	1.04042	1.03482	1.04843	0.0270487
D3XNU5	E-cadherin 1 OS=Homo sapiens GN=CDH1 PE=4 SV=1 - [D3XNU5_HUMAN]	14.17	11	11	46	882	97.4259	4.729	1.05187	1.00264	1.08849	1.04766	0.945937	0.969936	0.902557	0.939476	0.896734	0.0270578
A0A0S2Z3K4	BCL2-associated athanogene isoform 1 (Fragment) OS=Homo sapiens GN=BAG1 PE=2 SV=1 - [A0A0S2Z3K4_HUMAN]	11.31	2	2	3	274	31.0979	5.08447		1.03499	1.02894	1.03196		1.00152	0.991209	0.996364	0.965505	0.0270621
B4DKB2	Endothelin-converting enzyme 1 OS=Homo sapiens GN=ECE1 PE=1 SV=1 - [B4DKB2_HUMAN]	4.34	2	2	3	738	83.5204	5.73193	1.04739	1.10968	1.18214	1.11307	0.932465	0.997403	0.968696	0.966188	0.868039	0.0273385
E5KSX8	Mitochondrial transcription factor A OS=Homo sapiens PE=4 SV=1 - [E5KSX8_HUMAN]	28.86	8	8	22	246	29.0922	9.71533	0.958888	0.957874	0.895664	0.937476	1.04093	1.11503	1.01956	1.05851	1.1291	0.0275037
O15270	Serine palmitoyltransferase 2 OS=Homo sapiens GN=SPTLC2 PE=1 SV=1 - [SPTC2_HUMAN]	16.37	7	7	14	562	62.8839	7.78174	1.01516	1.15573	1.06192	1.0776	0.956227	0.915904	0.923379	0.931836	0.864731	0.0278238
B7Z532	cDNA FLJ51028, highly similar to 60 kDa heat shock protein, mitochondrial OS=Homo sapiens PE=2 SV=1 - [B7Z532_HUMAN]	48.98	1	11	155	245	26.6692	5.22412	0.972692	0.993399	1.04196	1.00268	1.1019	1.06062	1.08642	1.08298	1.08008	0.0279396
Q9UHD8	Septin-9 OS=Homo sapiens GN=SEPT9 PE=1 SV=2 - [SEPT9_HUMAN]	42.66	24	24	108	586	65.3608	8.96826	1.01166	1.03149	1.03684	1.02666	0.930859	0.963253	0.991748	0.961954	0.936972	0.0279683
M0R205	Interferon regulatory factor 3 (Fragment) OS=Homo sapiens GN=IRF3 PE=1 SV=1 - [M0R205_HUMAN]	8.01	2	2	7	287	31.7841	5.73193	0.976006	0.973836	0.951184	0.967009	1.00451	1.06067	1.02196	1.02905	1.06415	0.0279801
Q9HBH5	Retinol dehydrogenase 14 OS=Homo sapiens GN=RDH14 PE=1 SV=1 - [RDH14_HUMAN]	12.2	4	4	4	336	36.8414	8.79248	1.00171	1.0177	0.950187	0.989864	1.04554	1.08741	1.09608	1.07634	1.08736	0.0280352
B1AJY5	26S proteasome non-ATPase regulatory subunit 10 OS=Homo sapiens GN=PSMD10 PE=1 SV=1 - [B1AJY5_HUMAN]	38.38	5	5	18	185	20.2042	5.57959	0.949151	0.95413	1.0211	0.974793	1.10659	1.04765	1.06384	1.07269	1.10043	0.0282153
I3L2L5	Mapk-regulated corepressor-interacting protein 1 OS=Homo sapiens GN=MCRIP1 PE=1 SV=1 - [I3L2L5_HUMAN]	31.52	2	2	5	92	10.4564	9.40771	0.907192	0.977755	0.853587	0.912845	1.08756	1.01006	1.0864	1.06134	1.16267	0.0282387
B2R8R5	cDNA, FLJ94025, highly similar to Homo sapiens tripartite motif-containing 28 (TRIM28), mRNA OS=Homo sapiens PE=2 SV=1 - [B2R8R5_HUMAN]	37.37	27	27	164	835	88.5034	5.77002	0.994673	0.96881	0.91658	0.960021	1.02949	1.04154	1.04563	1.03889	1.08215	0.0283093
O43583	Density-regulated protein OS=Homo sapiens GN=DENR PE=1 SV=2 - [DENR_HUMAN]	36.36	5	5	15	198	22.0781	5.30029	0.981582	0.959555	0.871188	0.937442	1.03734	1.05615	1.08044	1.05798	1.12858	0.0285278
Q13546	Receptor-interacting serine/threonine-protein kinase 1 OS=Homo sapiens GN=RIPK1 PE=1 SV=3 - [RIPK1_HUMAN]	5.37	3	3	6	671	75.8826	6.32861	0.949365	0.925878	0.976139	0.950461	1.09461	1.02373	1.01894	1.04576	1.10027	0.0285763
B7ZA10	cDNA, FLJ79024, highly similar to Arfaptin-1 OS=Homo sapiens PE=2 SV=1 - [B7ZA10_HUMAN]	25.68	7	7	23	296	33.6617	8.42627	0.961314	0.969985	0.976197	0.969165	1.05002	1.00673	1.00481	1.02052	1.05299	0.0288529
E9PMI6	Methylosome subunit pICln OS=Homo sapiens GN=CLNS1A PE=1 SV=1 - [E9PMI6_HUMAN]	26.95	3	3	26	167	18.2477	4.41162	1.05544	0.988481	1.03437	1.0261	0.926797	0.949823	0.969005	0.948542	0.924416	0.0288727
B5MC79	Calmodulin-lysine N-methyltransferase OS=Homo sapiens GN=CAMKMT PE=1 SV=1 - [B5MC79_HUMAN]	26.47	3	3	3	136	14.9663	5.85889	1.07346	1.19673	1.05986	1.11001	0.967752	0.967361	0.892381	0.942498	0.849086	0.0289744
B3KNH1	cDNA FLJ14598 fis, clone NT2RM4002558, highly similar to Long-chain fatty acid transport protein 4 (EC 6.2.1.-) OS=Homo sapiens PE=2 SV=1 - [B3KNH1_HUMAN]	8.02	3	4	5	511	57.1578	6.99072	1.15618	1.12907	1.06896	1.11807	0.895696	0.990156	1.01771	0.967855	0.865647	0.0289801
A0A024QYZ6	Exocyst complex component 3, isoform CRA_a OS=Homo sapiens GN=EXOC3 PE=4 SV=1 - [A0A024QYZ6_HUMAN]	11.81	8	8	15	745	85.5133	6.29053	1.0159	1.01872	1.00706	1.01389	0.986843	0.957775	0.930351	0.958323	0.945191	0.0290865
P11234	Ras-related protein Ral-B OS=Homo sapiens GN=RALB PE=1 SV=1 - [RALB_HUMAN]	31.55	5	7	28	206	23.3939	6.62451	1.02071	0.997352	1.00092	1.00633	0.979136	0.966428	0.941601	0.962389	0.956336	0.0291437
E5RHW4	Erlin-2 (Fragment) OS=Homo sapiens GN=ERLIN2 PE=1 SV=1 - [E5RHW4_HUMAN]	42.9	10	13	35	338	37.7014	5.61768	0.941561	0.975256	0.912645	0.943154	1.0052	0.998733	1.03081	1.01158	1.07255	0.0292152
Q2NKX8	DNA excision repair protein ERCC-6-like OS=Homo sapiens GN=ERCC6L PE=1 SV=1 - [ERC6L_HUMAN]	4.08	4	4	6	1250	141.015	5.31299	1.04488	1.07462	1.03805	1.05252	0.975054	0.971156	1.01975	0.988653	0.939322	0.0292578
E7EVX8	U4/U6 small nuclear ribonucleoprotein Prp31 OS=Homo sapiens GN=PRPF31 PE=1 SV=1 - [E7EVX8_HUMAN]	15.42	6	6	15	493	54.732	5.78271	0.962621	0.969791	1.00747	0.979961	1.05143	1.09936	1.03194	1.06091	1.0826	0.0293992
P62917	60S ribosomal protein L8 OS=Homo sapiens GN=RPL8 PE=1 SV=2 - [RL8_HUMAN]	41.63	11	11	64	257	28.0073	11.0337	1.05685	1.04583	1.01217	1.03828	0.830283	0.873239	0.972248	0.891923	0.859038	0.0294724
P82933	28S ribosomal protein S9, mitochondrial OS=Homo sapiens GN=MRPS9 PE=1 SV=2 - [RT09_HUMAN]	33.33	11	11	36	396	45.8058	9.51025	1.02032	1.00631	0.999233	1.00862	1.02804	1.02929	1.03879	1.03204	1.02322	0.029513
Q9Y6G9	Cytoplasmic dynein 1 light intermediate chain 1 OS=Homo sapiens GN=DYNC1LI1 PE=1 SV=3 - [DC1L1_HUMAN]	27.72	10	10	19	523	56.544	6.41748	1.01107	0.989889	0.944665	0.981874	1.05552	1.04112	1.04796	1.0482	1.06755	0.0295678
Q08ES8	Cell growth-inhibiting protein 34 OS=Homo sapiens PE=2 SV=1 - [Q08ES8_HUMAN]	32.77	6	6	45	177	20.0816	9.59814	1.06111	1.04251	1.03904	1.04755	0.846735	0.872225	0.987963	0.902308	0.861347	0.0298871
K7EKI4	39S ribosomal protein L4, mitochondrial OS=Homo sapiens GN=MRPL4 PE=1 SV=1 - [K7EKI4_HUMAN]	44.88	4	4	13	127	14.0473	7.40088	1.00321	0.971116	0.955016	0.976448	1.02184	1.0895	1.05659	1.05598	1.08145	0.0300522
Q15172	Serine/threonine-protein phosphatase 2A 56 kDa regulatory subunit alpha isoform OS=Homo sapiens GN=PPP2R5A PE=1 SV=1 - [2A5A_HUMAN]	5.35	2	3	15	486	56.1582	6.7124	0.923046	0.961795	0.986128	0.95699	1.09465	1.10788	1.0128	1.07178	1.11995	0.0303771
A0A024R201	Proteasome (Prosome, macropain) 26S subunit, non-ATPase, 13, isoform CRA_a OS=Homo sapiens GN=PSMD13 PE=4 SV=1 - [A0A024R201_HUMAN]	59.84	20	20	71	376	42.8911	5.80811	1.00558	0.995528	0.989154	0.996755	1.05033	1.01453	1.04069	1.03518	1.03856	0.0304896
B4DZQ5	cDNA FLJ51417, highly similar to Serine/threonine-protein kinase PRP4 homolog (EC 2.7.11.1) OS=Homo sapiens PE=2 SV=1 - [B4DZQ5_HUMAN]	13.19	12	12	28	993	115.36	10.272	1.00703	0.960352	1.00671	0.991364	1.0509	1.03772	1.07849	1.0557	1.0649	0.0304979
Q06323	Proteasome activator complex subunit 1 OS=Homo sapiens GN=PSME1 PE=1 SV=1 - [PSME1_HUMAN]	56.22	15	15	115	249	28.705	6.02393	0.97911	0.975147	0.898748	0.951002	1.05628	1.02174	1.07737	1.0518	1.10599	0.0306233
A0A0A0MRE9	A-kinase anchor protein 9 OS=Homo sapiens GN=AKAP9 PE=1 SV=1 - [A0A0A0MRE9_HUMAN]	1.12	3	4	6	3126	362.354	4.89404	1.05102	1.05197	1.12039	1.07446	0.906967	1.00503	0.954307	0.955434	0.889224	0.0309376
Q86X52	Chondroitin sulfate synthase 1 OS=Homo sapiens GN=CHSY1 PE=1 SV=3 - [CHSS1_HUMAN]	2.87	2	2	3	802	91.7257	9.23193	0.949665	0.955637	0.876164	0.927156	1.04612	1.07873	0.997029	1.04062	1.12238	0.0312893
Q9H9J2	39S ribosomal protein L44, mitochondrial OS=Homo sapiens GN=MRPL44 PE=1 SV=1 - [RM44_HUMAN]	14.76	4	4	17	332	37.5117	8.39697	1.05428	1.07358	1.05081	1.05956	1.01654	0.975961	1.02434	1.00561	0.949087	0.0312896
B3KT25	cDNA FLJ37504 fis, clone BRAWH2017103, highly similar to ATPase WRNIP1 OS=Homo sapiens PE=2 SV=1 - [B3KT25_HUMAN]	15.64	8	8	15	614	66.6332	6.34131	0.984408	0.955155	0.946979	0.962181	1.07313	1.01375	1.01685	1.03457	1.07524	0.0318899
O95376	E3 ubiquitin-protein ligase ARIH2 OS=Homo sapiens GN=ARIH2 PE=1 SV=1 - [ARI2_HUMAN]	21.3	9	9	17	493	57.7811	5.63037	0.967642	0.977506	0.91792	0.954356	1.0169	1.03816	1.00734	1.0208	1.06962	0.0319525
Q9UBE0	SUMO-activating enzyme subunit 1 OS=Homo sapiens GN=SAE1 PE=1 SV=1 - [SAE1_HUMAN]	41.33	12	12	45	346	38.4256	5.30029	0.895259	0.908548	0.968964	0.924257	1.07173	1.04229	0.986279	1.03343	1.11812	0.0319752
Q9BT73	Proteasome assembly chaperone 3 OS=Homo sapiens GN=PSMG3 PE=1 SV=1 - [PSMG3_HUMAN]	12.3	1	1	3	122	13.0961	7.88428	1.04498	1.06789		1.05643	0.988072	0.97164		0.979856	0.927513	0.0322468
H7BYN4	Kinesin-like protein OS=Homo sapiens GN=KIF23 PE=1 SV=1 - [H7BYN4_HUMAN]	18.7	15	15	39	952	109.061	8.57275	1.03605	0.999749	1.0268	1.02086	0.978596	0.97519	0.933136	0.962307	0.94264	0.0325175
Q93034	Cullin-5 OS=Homo sapiens GN=CUL5 PE=1 SV=4 - [CUL5_HUMAN]	3.33	3	3	7	780	90.8974	7.94287	0.991904	0.907771	0.971306	0.956994	1.05493	1.03745	1.03163	1.04134	1.08814	0.0325653
Q9Y3U8	60S ribosomal protein L36 OS=Homo sapiens GN=RPL36 PE=1 SV=3 - [RL36_HUMAN]	36.19	4	5	33	105	12.2459	11.5903	1.09514	1.13532	1.03467	1.08838	0.866885	0.911039	1.00493	0.927619	0.852296	0.0326774
B3KUJ5	Histone deacetylase OS=Homo sapiens PE=2 SV=1 - [B3KUJ5_HUMAN]	16.59	4	6	22	458	51.9393	5.8208	1.04625	1.06685	1.08932	1.06747	0.989627	0.963495	1.02948	0.9942	0.93136	0.0327528
D3DVA4	KIAA0907, isoform CRA_a OS=Homo sapiens GN=KIAA0907 PE=4 SV=1 - [D3DVA4_HUMAN]	3.36	1	1	2	327	34.4898	9.23193		0.953755	0.900571	0.927163		1.08875	1.06937	1.07906	1.16383	0.0330062
O95232	Luc7-like protein 3 OS=Homo sapiens GN=LUC7L3 PE=1 SV=2 - [LC7L3_HUMAN]	29.63	11	12	21	432	51.4351	9.78857	0.982972	0.9945	0.943149	0.97354	1.01793	1.0247	1.03252	1.02505	1.05291	0.0330307
A0A024R326	Ribosomal protein L29, isoform CRA_a OS=Homo sapiens GN=RPL29 PE=4 SV=1 - [A0A024R326_HUMAN]	19.11	3	3	21	157	17.5419	11.6636	1.06916	1.09293	1.01374	1.05861	0.866583	0.850971	0.987568	0.901707	0.851783	0.0331014
Q7Z6E9	E3 ubiquitin-protein ligase RBBP6 OS=Homo sapiens GN=RBBP6 PE=1 SV=1 - [RBBP6_HUMAN]	2.79	5	5	7	1792	201.442	9.64209	0.877938	0.920151	0.854051	0.884046	1.1287	0.989198	0.999971	1.03929	1.17561	0.0335014
B7Z6L2	cDNA FLJ54156, highly similar to ADP-ribosylation factor GTPase-activating protein 3 OS=Homo sapiens PE=2 SV=1 - [B7Z6L2_HUMAN]	9.71	5	5	9	443	48.9284	7.66455	0.947541	0.898266	0.887883	0.91123	1.02512	1.01563	0.958242	0.999665	1.09705	0.0336476
C9JVN9	L-2-hydroxyglutarate dehydrogenase, mitochondrial OS=Homo sapiens GN=L2HGDH PE=1 SV=1 - [C9JVN9_HUMAN]	18.37	7	7	17	441	48.4439	8.646	0.93095	0.963467	0.907307	0.933908	1.10026	1.03016	0.998033	1.04282	1.11662	0.0336647
O43290	U4/U6.U5 tri-snRNP-associated protein 1 OS=Homo sapiens GN=SART1 PE=1 SV=1 - [SNUT1_HUMAN]	41.88	25	26	76	800	90.2003	6.12549	0.988586	1.00537	0.992473	0.995475	0.960138	0.981521	0.96826	0.969973	0.974382	0.0337303
P26885	Peptidyl-prolyl cis-trans isomerase FKBP2 OS=Homo sapiens GN=FKBP2 PE=1 SV=2 - [FKBP2_HUMAN]	23.94	4	4	10	142	15.6393	9.12939	1.00705	0.973814	0.963425	0.981429	1.05902	1.01566	1.04281	1.03916	1.05883	0.0340693
Q9NYV4	Cyclin-dependent kinase 12 OS=Homo sapiens GN=CDK12 PE=1 SV=2 - [CDK12_HUMAN]	6.44	4	7	22	1490	164.054	9.43701	1.00503	1.00276	0.978874	0.995555	1.03123	1.02923	1.06694	1.04247	1.04712	0.0341095
A0A024R301	Choline dehydrogenase, isoform CRA_a OS=Homo sapiens GN=CHDH PE=3 SV=1 - [A0A024R301_HUMAN]	11.11	5	5	8	594	65.3601	8.38232	0.964568	0.982366	0.925653	0.957529	1.00623	1.01015	1.03225	1.01621	1.06128	0.0343619
P30043	Flavin reductase (NADPH) OS=Homo sapiens GN=BLVRB PE=1 SV=3 - [BLVRB_HUMAN]	55.34	8	8	50	206	22.1054	7.6499	0.980884	0.972141	0.968776	0.973934	1.03932	1.00159	1.00274	1.01455	1.0417	0.0345804
Q9UL25	Ras-related protein Rab-21 OS=Homo sapiens GN=RAB21 PE=1 SV=3 - [RAB21_HUMAN]	40.44	8	8	33	225	24.3323	7.94287	0.984359	0.99825	0.99566	0.992757	1.01568	1.02921	1.05806	1.03432	1.04187	0.0346154
P46940	Ras GTPase-activating-like protein IQGAP1 OS=Homo sapiens GN=IQGAP1 PE=1 SV=1 - [IQGA1_HUMAN]	41.64	59	64	331	1657	189.134	6.48096	0.968649	0.990014	0.978743	0.979135	1.06002	1.00617	1.02947	1.03189	1.05388	0.0346468
E9PQD0	Probable RNA-binding protein EIF1AD OS=Homo sapiens GN=EIF1AD PE=1 SV=1 - [E9PQD0_HUMAN]	51.56	2	2	8	64	7.32701	10.5063	0.94836	0.997755	0.948689	0.964935	1.01647	1.02323	1.01246	1.01739	1.05436	0.0348732
B4E0X8	cDNA FLJ61021, highly similar to Far upstream element-binding protein 1 OS=Homo sapiens PE=2 SV=1 - [B4E0X8_HUMAN]	50.56	1	26	132	629	66.1908	7.56201	0.977292	0.996498	0.913202	0.96233	1.06866	1.02388	1.07569	1.05608	1.09742	0.0352016
B4DPT4	cDNA FLJ59732, highly similar to Septin-6 OS=Homo sapiens PE=2 SV=1 - [B4DPT4_HUMAN]	16.63	2	5	36	421	46.9152	7.53271	1.00297	1.00703	0.956836	0.988946	1.06785	1.0298	1.05232	1.04999	1.06173	0.0352985
Q9NXV6	CDKN2A-interacting protein OS=Homo sapiens GN=CDKN2AIP PE=1 SV=3 - [CARF_HUMAN]	31.21	15	15	42	580	61.0879	9.01221	0.885944	0.977657	0.924893	0.929498	1.08904	1.05668	0.997177	1.04763	1.12709	0.0353875
Q9NW82	WD repeat-containing protein 70 OS=Homo sapiens GN=WDR70 PE=1 SV=1 - [WDR70_HUMAN]	13.61	8	8	12	654	73.155	6.32861	1.04761	1.08698	1.01419	1.04959	0.907088	0.940155	0.993799	0.947014	0.902268	0.0355169
H3BRQ0	Phosphopantothenoylcysteine decarboxylase OS=Homo sapiens GN=PPCDC PE=1 SV=1 - [H3BRQ0_HUMAN]	25.58	3	3	8	172	18.6908	7.7085	0.924729	1.01241	0.918017	0.951719	1.04407	1.04761	1.04801	1.04657	1.09966	0.0356462
Q96HP0	Dedicator of cytokinesis protein 6 OS=Homo sapiens GN=DOCK6 PE=1 SV=3 - [DOCK6_HUMAN]	1.51	2	3	4	2047	229.414	6.7417		1.19667	1.12805	1.16236		0.985085	0.98629	0.985687	0.848005	0.0357109
P62241	40S ribosomal protein S8 OS=Homo sapiens GN=RPS8 PE=1 SV=2 - [RS8_HUMAN]	46.15	9	9	100	208	24.1902	10.3159	1.06647	1.05439	1.03932	1.05339	0.876917	0.930484	1.00319	0.936864	0.889377	0.0357441
P23526	Adenosylhomocysteinase OS=Homo sapiens GN=AHCY PE=1 SV=4 - [SAHH_HUMAN]	43.98	4	19	107	432	47.6852	6.34131	0.971519	0.916168	0.964712	0.9508	0.996338	1.07544	1.0757	1.04916	1.10345	0.0359228
Q9Y383	Putative RNA-binding protein Luc7-like 2 OS=Homo sapiens GN=LUC7L2 PE=1 SV=2 - [LC7L2_HUMAN]	38.52	15	15	53	392	46.4856	10.0083	1.00082	1.00647	0.971257	0.992846	1.01986	1.03618	1.03597	1.03067	1.0381	0.0360419
P16455	Methylated-DNA--protein-cysteine methyltransferase OS=Homo sapiens GN=MGMT PE=1 SV=1 - [MGMT_HUMAN]	30.92	5	5	15	207	21.6322	8.104	1.07229	1.11061	1.1536	1.11217	0.942197	0.874332	1.03509	0.950538	0.854672	0.0362997
P56470	Galectin-4 OS=Homo sapiens GN=LGALS4 PE=1 SV=1 - [LEG4_HUMAN]	22.6	6	6	21	323	35.9182	9.15869	0.984213	0.936667	0.923001	0.94796	0.996414	1.03327	1.01292	1.0142	1.06988	0.0363578
Q9NZI8	Insulin-like growth factor 2 mRNA-binding protein 1 OS=Homo sapiens GN=IGF2BP1 PE=1 SV=2 - [IF2B1_HUMAN]	35.88	17	20	49	577	63.4412	9.20264	0.949108	0.990139	0.974562	0.97127	1.04788	1.00379	1.02431	1.02533	1.05565	0.0364324
Q8TCT9	Minor histocompatibility antigen H13 OS=Homo sapiens GN=HM13 PE=1 SV=1 - [HM13_HUMAN]	18.83	7	7	29	377	41.4616	6.43018	1.00893	1.03329	1.04626	1.02949	0.970459	1.00353	0.972997	0.982329	0.954188	0.0365052
Q53HC9	Protein TSSC1 OS=Homo sapiens GN=EIPR1 PE=1 SV=2 - [TSSC1_HUMAN]	9.56	3	3	4	387	43.5761	5.05908	1.07555	1.0479	1.09919	1.07421	0.864961	0.944788	1.00716	0.938971	0.874103	0.0365076
F1T0I1	Protein transport protein Sec16A OS=Homo sapiens GN=SEC16A PE=1 SV=1 - [F1T0I1_HUMAN]	7.46	14	14	38	2334	249.328	5.84619	0.989427	1.02531	1.03367	1.01613	0.964173	0.981593	0.946859	0.964209	0.948898	0.0370197
A8KA68	cDNA FLJ75833, highly similar to Homo sapiens membrane-bound transcription factor peptidase, site 2 (MBTPS2), mRNA OS=Homo sapiens PE=2 SV=1 - [A8KA68_HUMAN]	5.01	2	2	6	519	57.4166	7.48877	0.982057	1.0629	1.10464	1.04987	0.885093	0.958037	0.922524	0.921885	0.878098	0.0373027
O95747	Serine/threonine-protein kinase OSR1 OS=Homo sapiens GN=OXSR1 PE=1 SV=1 - [OXSR1_HUMAN]	27.89	10	11	30	527	57.9861	6.43018	0.988872	0.949487	0.898806	0.945722	1.08299	1.04046	1.01507	1.04617	1.10622	0.0373715
O43823	A-kinase anchor protein 8 OS=Homo sapiens GN=AKAP8 PE=1 SV=1 - [AKAP8_HUMAN]	7.8	5	5	11	692	76.0611	5.14795	0.92716	0.951277	0.877901	0.918779	0.973439	1.07316	1.05246	1.03302	1.12434	0.0374821
Q01658	Protein Dr1 OS=Homo sapiens GN=DR1 PE=1 SV=1 - [NC2B_HUMAN]	11.93	2	2	7	176	19.4317	4.75439	0.99632	0.946948	0.95257	0.96528	1.04202	1.01997	1.00625	1.02275	1.05953	0.0375579
D3DVL7	Transforming growth factor beta regulator 4, isoform CRA_b OS=Homo sapiens GN=TBRG4 PE=4 SV=1 - [D3DVL7_HUMAN]	26.17	13	13	56	577	64.9673	6.80029	0.986025	1.00308	0.975877	0.988327	1.04343	1.01018	1.02551	1.02637	1.0385	0.0379268
Q6VY07	Phosphofurin acidic cluster sorting protein 1 OS=Homo sapiens GN=PACS1 PE=1 SV=2 - [PACS1_HUMAN]	3.12	2	2	7	963	104.833	7.73779	1.0239	1.08869	1.12055	1.07771	1.00204	0.850909	0.89335	0.915432	0.849421	0.0380827
P63218	Guanine nucleotide-binding protein G(I)/G(S)/G(O) subunit gamma-5 OS=Homo sapiens GN=GNG5 PE=1 SV=3 - [GBG5_HUMAN]	23.53	2	2	4	68	7.31381	9.84717	1.05316	1.16274	1.14068	1.11886	0.927423	1.03927	0.963571	0.976756	0.872995	0.0389429
Q15404	Ras suppressor protein 1 OS=Homo sapiens GN=RSU1 PE=1 SV=3 - [RSU1_HUMAN]	23.1	5	5	15	277	31.5207	8.646	1.04116	1.05404	1.08429	1.05983	0.868767	0.941811	1.00164	0.937406	0.884486	0.039028
B7Z8G2	cDNA FLJ58213, highly similar to FK506-binding protein 5 (EC 5.2.1.8) OS=Homo sapiens PE=2 SV=1 - [B7Z8G2_HUMAN]	17.14	8	8	16	420	47.2725	5.87158	0.929604	0.967587	0.935716	0.944302	1.05943	1.05616	0.978829	1.03147	1.09231	0.0391115
M0R0R3	Small integral membrane protein 7 OS=Homo sapiens GN=SMIM7 PE=1 SV=1 - [M0R0R3_HUMAN]	26.98	2	2	3	63	7.33875	8.92432	0.889484	0.999525	0.973909	0.954306	1.17946	1.04727	1.09606	1.1076	1.16063	0.0395724
P62263	40S ribosomal protein S14 OS=Homo sapiens GN=RPS14 PE=1 SV=3 - [RS14_HUMAN]	36.42	5	5	84	151	16.2625	10.0522	1.03919	1.09466	0.999554	1.04447	0.851571	0.880657	0.977603	0.903277	0.864819	0.0398724
B3KTC9	cDNA FLJ38075 fis, clone CTONG2015815, highly similar to F-box/LRR-repeat protein 18 OS=Homo sapiens PE=2 SV=1 - [B3KTC9_HUMAN]	3.17	2	2	4	663	72.3504	8.63135	0.887563	0.949131	1.03838	0.958357	1.10671	1.0743	1.09678	1.0926	1.14007	0.0401283
Q14166	Tubulin--tyrosine ligase-like protein 12 OS=Homo sapiens GN=TTLL12 PE=1 SV=2 - [TTL12_HUMAN]	38.35	18	18	66	644	74.356	5.52881	0.972649	0.984179	0.958156	0.971661	0.990867	1.02024	1.03086	1.01399	1.04356	0.0401401
P11388	DNA topoisomerase 2-alpha OS=Homo sapiens GN=TOP2A PE=1 SV=3 - [TOP2A_HUMAN]	36.05	38	52	169	1531	174.276	8.71924	1.0515	1.15377	1.20549	1.13692	0.948352	1.03495	0.935351	0.972883	0.855718	0.0406171
Q5T123	SH3 domain-binding glutamic acid-rich-like protein 3 OS=Homo sapiens GN=SH3BGRL3 PE=1 SV=1 - [Q5T123_HUMAN]	45.45	4	4	19	88	9.37476	9.36377	0.901597	0.9281	0.856347	0.895348	1.13799	1.02741	0.979436	1.04828	1.17081	0.0409447
Q86UY0	TXNDC5 protein OS=Homo sapiens GN=TXNDC5 PE=1 SV=1 - [Q86UY0_HUMAN]	40.28	14	14	73	360	40.3439	5.8335	1.01317	1.08234	1.05383	1.04978	1.00306	0.958406	0.934618	0.965363	0.919586	0.0409499
C9J712	Profilin OS=Homo sapiens GN=PFN2 PE=1 SV=1 - [C9J712_HUMAN]	67.03	2	6	37	91	9.79195	9.36377	0.839708	0.884628	0.972032	0.89879	1.13213	1.08324	0.989721	1.06836	1.18867	0.0410456
Q6ZRP7	Sulfhydryl oxidase 2 OS=Homo sapiens GN=QSOX2 PE=1 SV=3 - [QSOX2_HUMAN]	17.62	10	10	24	698	77.4796	7.72314	1.01712	1.04044	1.06973	1.04243	1.00866	0.958638	0.965061	0.977453	0.937666	0.041126
F5H2U8	High mobility group protein HMGI-C OS=Homo sapiens GN=HMGA2 PE=1 SV=1 - [F5H2U8_HUMAN]	31.31	2	2	9	99	10.7608	12.0884	0.888004	1.01605	0.860915	0.921656	1.12774	1.03298	1.09786	1.0862	1.17853	0.0411789
Q96RT1	Erbin OS=Homo sapiens GN=ERBIN PE=1 SV=2 - [ERBIN_HUMAN]	3.82	5	5	8	1412	158.2	5.50342	1.00856	1.0488	1.02803	1.02847	0.99063	0.934399	0.897142	0.940724	0.914686	0.0411849
O75475	PC4 and SFRS1-interacting protein OS=Homo sapiens GN=PSIP1 PE=1 SV=1 - [PSIP1_HUMAN]	20.75	10	11	27	530	60.0667	9.12939	0.980925	0.988989	0.97663	0.982181	1.06648	1.05009	1.00283	1.0398	1.05866	0.0412728
P19784	Casein kinase II subunit alpha' OS=Homo sapiens GN=CSNK2A2 PE=1 SV=1 - [CSK22_HUMAN]	36.86	10	11	40	350	41.1871	8.55811	0.960203	1.0046	1.0079	0.990903	1.08521	1.03285	1.12193	1.08	1.08991	0.041463
B3KNN8	cDNA FLJ30053 fis, clone ADRGL1000144, highly similar to StAR-related lipid transfer protein 7 OS=Homo sapiens PE=2 SV=1 - [B3KNN8_HUMAN]	9.67	2	2	3	269	31.6024	6.62451	1.0559		1.02818	1.04204	0.956739		0.924088	0.940414	0.902475	0.0416519
A8K964	cDNA FLJ75071, highly similar to Homo sapiens pinin, desmosome associated protein (PNN), mRNA OS=Homo sapiens PE=2 SV=1 - [A8K964_HUMAN]	23.85	17	17	51	717	81.4929	7.37158	0.975604	0.991143	0.950031	0.972259	1.07234	1.06693	1.00259	1.04729	1.07717	0.0418496
M0R266	IgG receptor FcRn large subunit p51 (Fragment) OS=Homo sapiens GN=FCGRT PE=1 SV=1 - [M0R266_HUMAN]	4.96	1	1	2	141	15.4878	5.12256		1.02252	1.05961	1.04106		0.953738	0.938355	0.946046	0.908731	0.0418509
B4DWN1	cDNA FLJ52285, highly similar to Vesicular integral-membrane protein VIP36 OS=Homo sapiens PE=2 SV=1 - [B4DWN1_HUMAN]	30.18	8	8	31	285	32.5571	6.53662	1.01774	1.06086	1.03179	1.03679	1.00492	0.99691	0.985434	0.995756	0.960419	0.0418656
P00441	Superoxide dismutase [Cu-Zn] OS=Homo sapiens GN=SOD1 PE=1 SV=2 - [SODC_HUMAN]	52.6	6	6	44	154	15.9259	6.12549	0.959836	0.964742	0.984403	0.96966	1.08941	1.05194	1.00176	1.04771	1.08049	0.0420794
B2RBL9	cDNA, FLJ95582, highly similar to Homo sapiens breast cancer anti-estrogen resistance 1 (BCAR1),mRNA OS=Homo sapiens PE=2 SV=1 - [B2RBL9_HUMAN]	13.45	7	7	14	870	93.3474	5.61768	1.01431	1.01876	1.05257	1.02855	0.949619	0.988046	0.900993	0.946219	0.919958	0.0420889
J3KSI4	Mannose-P-dolichol utilization defect 1 protein OS=Homo sapiens GN=MPDU1 PE=1 SV=1 - [J3KSI4_HUMAN]	19.23	1	1	7	52	5.78196	4.80518	0.895274	1.02063	1.00668	0.974192	1.20142	1.0674	1.14116	1.13666	1.16677	0.042822
Q8NB90	Spermatogenesis-associated protein 5 OS=Homo sapiens GN=SPATA5 PE=1 SV=3 - [SPAT5_HUMAN]	13.77	9	10	20	893	97.8429	5.65576	1.04433	1.01588	0.984682	1.01497	0.954184	0.91818	0.970206	0.947523	0.933551	0.0432351
D3DWL9	Cleavage and polyadenylation specific factor 1, 160kDa, isoform CRA_a OS=Homo sapiens GN=CPSF1 PE=4 SV=1 - [D3DWL9_HUMAN]	16.56	19	19	35	1365	151.89	6.32861	0.976697	0.993434	0.976895	0.982342	1.00356	1.06401	1.0673	1.04496	1.06374	0.0432893
Q59EC6	Ret finger protein isoform beta variant (Fragment) OS=Homo sapiens PE=2 SV=1 - [Q59EC6_HUMAN]	7.07	2	2	3	382	43.3549	8.1626	1.08432	1.06049	1.15936	1.10139	0.947689	0.860821	1.01857	0.942362	0.855612	0.0432944
B4DRC8	cDNA FLJ50047 OS=Homo sapiens PE=2 SV=1 - [B4DRC8_HUMAN]	12.1	3	3	5	347	38.2445	6.43018	1.06731	1.03453	1.16416	1.08866	0.992989	0.943196	0.872956	0.93638	0.860118	0.0434005
P82675	28S ribosomal protein S5, mitochondrial OS=Homo sapiens GN=MRPS5 PE=1 SV=2 - [RT05_HUMAN]	17.44	7	7	18	430	47.9761	9.92041	1.03231	0.997672	0.993375	1.00778	1.04418	1.04182	1.06909	1.0517	1.04357	0.043755
H7C0V9	Amyloid beta A4 protein (Fragment) OS=Homo sapiens GN=APP PE=1 SV=1 - [H7C0V9_HUMAN]	13.2	5	5	10	485	55.0571	4.81787	1.08052	1.0943	1.07656	1.08379	1.03247	0.857611	0.880051	0.923376	0.851986	0.0438273
Q9Y5J7	Mitochondrial import inner membrane translocase subunit Tim9 OS=Homo sapiens GN=TIMM9 PE=1 SV=1 - [TIM9_HUMAN]	65.17	5	5	12	89	10.3711	7.21045	0.923279	1.00453	0.878264	0.935357	1.07736	1.04493	1.02881	1.05036	1.12295	0.0439601
P46109	Crk-like protein OS=Homo sapiens GN=CRKL PE=1 SV=1 - [CRKL_HUMAN]	26.73	6	6	21	303	33.7559	6.7417	0.94205	1.01078	0.925069	0.959298	1.09653	1.10143	1.0147	1.07089	1.11632	0.0439899
A0A024QZP7	Cell division cycle 2, G1 to S and G2 to M, isoform CRA_a OS=Homo sapiens GN=CDC2 PE=1 SV=1 - [A0A024QZP7_HUMAN]	60.94	13	15	60	297	34.0599	8.39697	1.04273	1.06258	1.05395	1.05309	0.89364	0.971724	1.00433	0.956564	0.908343	0.0443284
P78536	Disintegrin and metalloproteinase domain-containing protein 17 OS=Homo sapiens GN=ADAM17 PE=1 SV=1 - [ADA17_HUMAN]	9.22	6	6	10	824	92.9613	5.75732	1.00678	1.15243	0.996182	1.0518	0.906022	0.902885	0.908493	0.9058	0.861193	0.044346
Q9P0P0	E3 ubiquitin-protein ligase RNF181 OS=Homo sapiens GN=RNF181 PE=1 SV=1 - [RN181_HUMAN]	15.69	3	3	4	153	17.8975	5.05908	1.09298	1.01131	1.02807	1.04412	0.905411	0.963498	0.803535	0.890815	0.853175	0.0443785
E5RHF4	39S ribosomal protein L15, mitochondrial (Fragment) OS=Homo sapiens GN=MRPL15 PE=1 SV=1 - [E5RHF4_HUMAN]	8.59	2	2	8	198	21.9298	10.7847	0.953143	1.00312	0.966131	0.974132	1.00774	1.0594	1.07601	1.04772	1.07554	0.0443992
P11766	Alcohol dehydrogenase class-3 OS=Homo sapiens GN=ADH5 PE=1 SV=4 - [ADHX_HUMAN]	36.1	12	12	37	374	39.6984	7.48877	1.00976	0.951479	0.929399	0.963546	1.03009	1.02859	1.04463	1.03444	1.07357	0.0444542
O94819	Kelch repeat and BTB domain-containing protein 11 OS=Homo sapiens GN=KBTBD11 PE=1 SV=1 - [KBTBB_HUMAN]	2.41	1	1	2	623	65.6788	6.07471		1.11572	1.05246	1.08409		0.916846	0.941658	0.929252	0.857171	0.0449319
Q9UKK9	ADP-sugar pyrophosphatase OS=Homo sapiens GN=NUDT5 PE=1 SV=1 - [NUDT5_HUMAN]	36.53	8	8	44	219	24.3122	4.94482	0.985568	0.964545	0.908213	0.952775	1.01581	1.02404	1.07601	1.03862	1.0901	0.0450025
O15042	U2 snRNP-associated SURP motif-containing protein OS=Homo sapiens GN=U2SURP PE=1 SV=2 - [SR140_HUMAN]	18.56	18	18	49	1029	118.219	8.47021	0.988858	1.00524	0.990575	0.994891	1.07086	1.03402	1.01938	1.04142	1.04677	0.0451536
Q15555	Microtubule-associated protein RP/EB family member 2 OS=Homo sapiens GN=MAPRE2 PE=1 SV=1 - [MARE2_HUMAN]	17.74	4	4	7	327	37.0082	5.56689	0.915193	0.923479	0.970424	0.936365	1.02401	1.01242	1.13124	1.05589	1.12765	0.0451592
Q9BV20	Methylthioribose-1-phosphate isomerase OS=Homo sapiens GN=MRI1 PE=1 SV=1 - [MTNA_HUMAN]	27.91	8	8	20	369	39.1254	6.30322	1.04505	1.03422	1.07778	1.05235	1.01235	1.01013	1.01916	1.01388	0.963445	0.0451677
P13674	Prolyl 4-hydroxylase subunit alpha-1 OS=Homo sapiens GN=P4HA1 PE=1 SV=2 - [P4HA1_HUMAN]	34.46	1	16	42	534	61.011	6.01123	1.05778	1.151	1.20185	1.13688	1.04034	0.879673	0.95065	0.956888	0.841681	0.045591
O60763	General vesicular transport factor p115 OS=Homo sapiens GN=USO1 PE=1 SV=2 - [USO1_HUMAN]	16.74	14	14	49	962	107.828	4.90674	0.966575	0.947774	0.913344	0.942564	1.05107	0.994994	0.993063	1.01304	1.07477	0.0456564
P28340	DNA polymerase delta catalytic subunit OS=Homo sapiens GN=POLD1 PE=1 SV=2 - [DPOD1_HUMAN]	12.01	12	12	23	1107	123.553	7.03467	1.0092	1.01855	1.00497	1.0109	1.03211	1.02828	1.05705	1.03915	1.02794	0.0458779
B9EIS5	PCM1 protein OS=Homo sapiens GN=PCM1 PE=2 SV=1 - [B9EIS5_HUMAN]	12.8	20	20	41	2016	227.532	5.03369	1.07756	1.06107	1.06658	1.06841	0.941766	1.03971	0.944991	0.975488	0.913031	0.0459174
Q86VR2	Protein FAM134C OS=Homo sapiens GN=FAM134C PE=1 SV=1 - [F134C_HUMAN]	8.37	3	3	10	466	51.3637	4.97021	0.969058	1.01854	0.975643	0.987748	1.05597	1.07297	1.02109	1.05001	1.06303	0.0459182
H0Y2Y8	Zyxin (Fragment) OS=Homo sapiens GN=ZYX PE=1 SV=1 - [H0Y2Y8_HUMAN]	20.56	7	7	16	540	57.6063	6.87354	1.03261	0.953136	0.927397	0.971049	1.09581	1.06321	1.0499	1.06964	1.10153	0.0459542
B4DMG1	cDNA FLJ57155, highly similar to High mobility group protein 20A OS=Homo sapiens PE=2 SV=1 - [B4DMG1_HUMAN]	12.39	3	3	7	234	27.7341	6.91748	1.04037	1.10376	1.02306	1.05573	0.998352	0.969552	0.931901	0.966602	0.915577	0.0459753
B7ZLP5	SAFB protein OS=Homo sapiens GN=SAFB PE=2 SV=1 - [B7ZLP5_HUMAN]	19.47	7	17	45	914	102.518	5.43994	0.988222	0.985438	0.908605	0.960755	1.1367	1.15523	1.01891	1.10361	1.14869	0.0461348
A6NGW1	Protein YIF1A OS=Homo sapiens GN=YIF1A PE=1 SV=1 - [A6NGW1_HUMAN]	9.13	2	2	10	241	26.3605	9.30518	0.952869	1.00272	1.04579	1.00046	0.884412	0.913681	0.93798	0.912024	0.911606	0.0462435
Q9NXF7	DDB1- and CUL4-associated factor 16 OS=Homo sapiens GN=DCAF16 PE=1 SV=1 - [DCA16_HUMAN]	5.56	1	1	3	216	24.178	6.03662	0.962422	0.924919	0.919915	0.935752	0.968967	1.05823	1.03724	1.02148	1.09161	0.0464854
Q8IWR0	Zinc finger CCCH domain-containing protein 7A OS=Homo sapiens GN=ZC3H7A PE=1 SV=1 - [Z3H7A_HUMAN]	3.71	3	3	4	971	110.466	7.29834	1.05047	1.04018	0.995913	1.02886	0.944891	0.994973	0.942035	0.960633	0.933691	0.0466996
Q9Y2A7	Nck-associated protein 1 OS=Homo sapiens GN=NCKAP1 PE=1 SV=1 - [NCKP1_HUMAN]	23.23	24	24	72	1128	128.707	6.62451	0.984282	0.960922	0.990341	0.978515	1.00686	1.00169	1.02603	1.01152	1.03373	0.0469529
P16152	Carbonyl reductase [NADPH] 1 OS=Homo sapiens GN=CBR1 PE=1 SV=3 - [CBR1_HUMAN]	66.79	11	14	64	277	30.3559	8.32373	0.972302	0.968303	1.00735	0.982651	1.05165	1.05678	1.00804	1.03883	1.05717	0.0471523
W4VSQ9	Cdc42-interacting protein 4 OS=Homo sapiens GN=TRIP10 PE=1 SV=1 - [W4VSQ9_HUMAN]	10.46	5	5	10	593	67.689	6.15088	0.936097	0.955388	0.945938	0.945808	1.10413	1.02343	0.993869	1.04047	1.10009	0.0472062
P46060	Ran GTPase-activating protein 1 OS=Homo sapiens GN=RANGAP1 PE=1 SV=1 - [RAGP1_HUMAN]	35.09	19	19	68	587	63.5023	4.67822	1.08792	1.03853	1.08881	1.07176	0.889027	1.00645	0.98359	0.95969	0.895438	0.0473366
B4DNW3	cDNA FLJ51914, highly similar to Protein DEK OS=Homo sapiens PE=2 SV=1 - [B4DNW3_HUMAN]	30.2	13	13	44	351	40.1358	8.85107	0.991648	0.991542	0.999251	0.994147	1.00885	1.04596	1.02216	1.02566	1.0317	0.0475346
B7Z5R6	Next to BRCA1 gene 1 protein OS=Homo sapiens GN=NBR1 PE=1 SV=1 - [B7Z5R6_HUMAN]	1.79	1	1	2	837	92.8903	4.97021	0.93058		0.945726	0.938153	1.01604		0.990711	1.00337	1.06952	0.0475543
P38432	Coilin OS=Homo sapiens GN=COIL PE=1 SV=1 - [COIL_HUMAN]	12.85	8	8	23	576	62.5699	9.0708	0.921444	1.04046	0.966072	0.975991	1.10232	1.05395	1.08997	1.08208	1.1087	0.047833
V9GY66	COMM domain-containing protein 7 (Fragment) OS=Homo sapiens GN=COMMD7 PE=1 SV=1 - [V9GY66_HUMAN]	4.46	1	1	2	157	17.4051	6.55127	0.979209	0.962985		0.971097	1.03139	1.01433		1.02286	1.0533	0.048024
K7ES89	Dual-specificity protein phosphatase 3 (Fragment) OS=Homo sapiens GN=DUSP3 PE=1 SV=1 - [K7ES89_HUMAN]	18.94	2	2	6	132	14.3474	9.40771	0.947435		0.99132	0.969377	1.06779		1.09284	1.08031	1.11444	0.0481553
Q13641	Trophoblast glycoprotein OS=Homo sapiens GN=TPBG PE=1 SV=1 - [TPBG_HUMAN]	2.38	1	1	3	420	46.0028	6.82959		0.969558	0.968015	0.968786		1.05478	1.1055	1.08014	1.11494	0.0481948
Q8TEZ9	SR rich protein (Fragment) OS=Homo sapiens PE=2 SV=1 - [Q8TEZ9_HUMAN]	4.4	2	2	3	500	57.0013	5.09717	1.007	0.979683	0.906428	0.964372	1.10647	1.09549	1.02434	1.07543	1.11517	0.0484146
P50914	60S ribosomal protein L14 OS=Homo sapiens GN=RPL14 PE=1 SV=4 - [RL14_HUMAN]	33.49	7	7	72	215	23.417	10.9312	1.10701	1.07847	1.04728	1.07758	0.829537	0.878233	1.02071	0.909494	0.844012	0.0484958
Q07065	Cytoskeleton-associated protein 4 OS=Homo sapiens GN=CKAP4 PE=1 SV=2 - [CKAP4_HUMAN]	55.81	31	31	99	602	65.9827	5.92236	0.981181	0.994975	0.972448	0.982868	1.01487	1.00421	0.998229	1.00577	1.0233	0.0485875
Q13200	26S proteasome non-ATPase regulatory subunit 2 OS=Homo sapiens GN=PSMD2 PE=1 SV=3 - [PSMD2_HUMAN]	38.66	30	30	148	908	100.136	5.19873	0.970561	0.989212	0.979485	0.979753	1.00065	1.02142	0.996337	1.00614	1.02693	0.048953
Q8NBK3	Sulfatase-modifying factor 1 OS=Homo sapiens GN=SUMF1 PE=1 SV=3 - [SUMF1_HUMAN]	11.76	3	3	9	374	40.5305	6.65381	1.05662	1.15054	1.13285	1.11333	1.04415	0.904997	0.976804	0.975317	0.876033	0.0492324
B4DWX6	cDNA FLJ53936, highly similar to Medium-chain specific acyl-CoA dehydrogenase, mitochondrial (EC 1.3.99.3) OS=Homo sapiens PE=2 SV=1 - [B4DWX6_HUMAN]	18.96	7	7	15	385	42.4595	6.43018	0.899055	0.970955	0.934559	0.934856	1.07169	0.989173	1.01242	1.02443	1.09581	0.0495587
O75976	Carboxypeptidase D OS=Homo sapiens GN=CPD PE=1 SV=2 - [CBPD_HUMAN]	8.41	11	11	21	1380	152.835	6.04932	0.941642	1.07338	1.12286	1.04596	0.934555	0.84561	0.836717	0.872294	0.833964	0.0497791
Q9NTJ5	Phosphatidylinositide phosphatase SAC1 OS=Homo sapiens GN=SACM1L PE=1 SV=2 - [SAC1_HUMAN]	22.49	14	14	23	587	66.924	7.12256	0.903578	0.957407	1.0226	0.961196	1.09955	1.04777	1.05377	1.06703	1.11011	0.0499242
Q8TA86	Retinitis pigmentosa 9 protein OS=Homo sapiens GN=RP9 PE=1 SV=2 - [RP9_HUMAN]	14.93	3	3	6	221	26.0905	9.78857	0.995741	0.952807	0.978386	0.975645	1.04179	1.12789	1.03174	1.06714	1.09378	0.0500375
A0A0A0MSX3	Epithelial discoidin domain-containing receptor 1 OS=Homo sapiens GN=DDR1 PE=1 SV=1 - [A0A0A0MSX3_HUMAN]	4.95	4	4	9	767	85.3972	6.96143	1.00123	1.13496	1.09967	1.07862	0.999201	0.838092	0.818265	0.885186	0.820665	0.0504381
I3L2C7	Gem-associated protein 4 OS=Homo sapiens GN=GEMIN4 PE=1 SV=1 - [I3L2C7_HUMAN]	14.8	14	14	29	1047	118.745	6.18896	1.06548	1.03587	1.04166	1.04767	0.934458	1.01211	0.990455	0.979007	0.934463	0.0506658
B7Z5H7	cDNA FLJ51946, highly similar to Cell division cycle 7-related protein kinase (EC 2.7.11.1) OS=Homo sapiens PE=2 SV=1 - [B7Z5H7_HUMAN]	4.03	2	2	3	546	60.643	8.82178	0.963982	0.933534		0.948758	1.11997	1.06099		1.09048	1.14938	0.0507125
A0A024R223	Vacuolar protein sorting 13A (Yeast), isoform CRA_c OS=Homo sapiens GN=VPS13A PE=4 SV=1 - [A0A024R223_HUMAN]	1.31	3	3	3	2986	338.973	6.03662	1.04414	1.01011		1.02713	0.949442	0.956705		0.953073	0.927901	0.0509989
R4GN43	NADH dehydrogenase [ubiquinone] 1 alpha subcomplex subunit 6 OS=Homo sapiens GN=NDUFA6 PE=1 SV=1 - [R4GN43_HUMAN]	26.76	2	2	7	71	8.50446	9.46631	0.901795	0.957926	0.940828	0.933516	0.977068	1.0225	1.07751	1.02569	1.09874	0.0510949
B4DK26	cDNA FLJ61301, highly similar to CD276 antigen OS=Homo sapiens PE=2 SV=1 - [B4DK26_HUMAN]	12.92	3	3	6	480	51.6935	4.91943	1.00289	1.02944	1.02177	1.01803	0.888792	0.99064	0.912153	0.930529	0.914044	0.0512706
D6RBF6	3-hydroxybutyrate dehydrogenase type 2 OS=Homo sapiens GN=BDH2 PE=1 SV=1 - [D6RBF6_HUMAN]	15.63	1	1	2	64	6.86167	8.1626		0.922143	0.864658	0.893401		1.02844	1.07659	1.05252	1.1781	0.0512931
P0CJ79	Zinc finger protein 888 OS=Homo sapiens GN=ZNF888 PE=3 SV=1 - [ZN888_HUMAN]	14.4	2	2	5	500	58.6891	9.08545	1.11001		1.10974	1.10987	0.792037		0.913289	0.852663	0.768251	0.0513171
B4DYU9	cDNA FLJ60060, highly similar to Origin recognition complex subunit 2 OS=Homo sapiens PE=2 SV=1 - [B4DYU9_HUMAN]	6.81	4	4	4	514	58.6313	7.12256		0.90353	0.905182	0.904356		1.04027	0.988432	1.01435	1.12163	0.0513405
A0A087WU78	Nance-Horan syndrome protein OS=Homo sapiens GN=NHS PE=1 SV=1 - [A0A087WU78_HUMAN]	0.76	1	1	3	1447	157.672	7.02002	1.07638	0.971726	1.07057	1.03956	0.899452	0.957105	0.946258	0.934272	0.898718	0.0513855
A0PK02	PLXNB2 protein OS=Homo sapiens GN=PLXNB2 PE=2 SV=1 - [A0PK02_HUMAN]	8.62	1	2	8	522	56.2411	6.58057	1.06412	1.06989	1.12165	1.08522	0.985044	0.915712	1.03406	0.978272	0.901449	0.0514072
Q8TDN6	Ribosome biogenesis protein BRX1 homolog OS=Homo sapiens GN=BRIX1 PE=1 SV=2 - [BRX1_HUMAN]	27.76	10	10	32	353	41.3749	9.92041	1.18995	1.22561	0.995329	1.13696	0.752165	0.753842	1.00221	0.836074	0.735357	0.0516804
P35052	Glypican-1 OS=Homo sapiens GN=GPC1 PE=1 SV=2 - [GPC1_HUMAN]	14.16	6	6	9	558	61.641	7.29834	0.974635	1.04876	1.17689	1.06676	0.955117	0.796638	0.785213	0.845656	0.792732	0.0517331
A8K0A4	cDNA FLJ77631, highly similar to Homo sapiens HLA-B associated transcript 5 (BAT5), mRNA OS=Homo sapiens PE=2 SV=1 - [A8K0A4_HUMAN]	7.71	4	4	8	558	63.2191	8.00146	0.932153	1.00108	0.964512	0.965915	1.0785	1.00455	1.09208	1.05838	1.09572	0.0517445
P61254	60S ribosomal protein L26 OS=Homo sapiens GN=RPL26 PE=1 SV=1 - [RL26_HUMAN]	35.17	2	8	48	145	17.2475	10.5503	1.09266	1.08732	0.989826	1.0566	0.925006	0.865484	0.984676	0.925055	0.8755	0.0517811
X5DR54	NudE neurodevelopment protein 1 isoform B (Fragment) OS=Homo sapiens GN=NDE1 PE=1 SV=1 - [X5DR54_HUMAN]	45.07	12	12	29	335	37.6978	5.14795	1.09982	1.05327	1.08209	1.07839	0.88667	1.02165	0.980418	0.962912	0.892914	0.0520098
A3KN83	Protein strawberry notch homolog 1 OS=Homo sapiens GN=SBNO1 PE=1 SV=1 - [SBNO1_HUMAN]	12.63	12	12	27	1393	154.216	7.88428	0.994926	0.986156	1.05182	1.01097	0.951598	0.956283	0.9556	0.954494	0.944139	0.0520705
B2RDZ1	cDNA, FLJ96840, highly similar to Homo sapiens valyl-tRNA synthetase 2-like (VARS2L), mRNA OS=Homo sapiens PE=2 SV=1 - [B2RDZ1_HUMAN]	3.89	2	2	4	642	71.5467	6.65381	0.926568		0.953912	0.94024	1.00142		1.02186	1.01164	1.07594	0.052675
A6PVN5	Serine/threonine-protein phosphatase 2A activator OS=Homo sapiens GN=PTPA PE=1 SV=1 - [A6PVN5_HUMAN]	28.27	10	10	25	329	37.352	6.29053	0.964123	0.994825	0.992908	0.983952	1.0784	1.03703	1.01276	1.04273	1.05973	0.052796
P62330	ADP-ribosylation factor 6 OS=Homo sapiens GN=ARF6 PE=1 SV=2 - [ARF6_HUMAN]	42.29	5	6	36	175	20.0694	8.95361	0.971801	0.91953	1.00386	0.965064	1.01408	1.08012	1.11473	1.06964	1.10837	0.0528556
B4DJD2	cDNA FLJ60592 OS=Homo sapiens PE=2 SV=1 - [B4DJD2_HUMAN]	7.08	2	2	2	339	39.461	6.30322		1.06105	1.18151	1.12128		0.847521	0.877463	0.862492	0.769203	0.0529776
Q7RTV0	PHD finger-like domain-containing protein 5A OS=Homo sapiens GN=PHF5A PE=1 SV=1 - [PHF5A_HUMAN]	48.18	6	6	19	110	12.397	8.41162	1.00661	0.971187	0.902286	0.960027	1.04317	1.08824	1.03374	1.05505	1.09898	0.0530178
Q9Y371	Endophilin-B1 OS=Homo sapiens GN=SH3GLB1 PE=1 SV=1 - [SHLB1_HUMAN]	16.44	5	5	17	365	40.7708	6.03662	0.986854	0.980319	0.96188	0.976351	0.993273	0.999015	1.01072	1.001	1.02525	0.0531015
F8W8I6	Nucleolysin TIA-1 isoform p40 OS=Homo sapiens GN=TIA1 PE=1 SV=1 - [F8W8I6_HUMAN]	15.84	2	6	20	385	42.8075	7.73779	0.992426	0.984277	0.916862	0.964521	1.01754	1.04261	1.0834	1.04785	1.0864	0.0532339
P62753	40S ribosomal protein S6 OS=Homo sapiens GN=RPS6 PE=1 SV=1 - [RS6_HUMAN]	38.15	13	13	83	249	28.663	10.8433	1.07845	1.10434	0.993613	1.0588	0.782282	0.867929	0.982206	0.877472	0.828741	0.0534482
M0QXG9	BRISC and BRCA1-A complex member 1 OS=Homo sapiens GN=BABAM1 PE=1 SV=2 - [M0QXG9_HUMAN]	10.19	1	1	3	108	11.5384	4.33545	0.985755	1.10518	1.19436	1.0951	0.783904	0.974875	0.860638	0.873139	0.797316	0.0537814
B4DRA5	cDNA FLJ61346, highly similar to Protein transport protein Sec23B OS=Homo sapiens PE=2 SV=1 - [B4DRA5_HUMAN]	16.17	8	9	28	742	83.7562	7.09326	0.964811	0.993971	0.986705	0.981829	1.04469	1.0116	1.09252	1.0496	1.06903	0.0539167
E9PL10	Transcription factor BTF3 OS=Homo sapiens GN=BTF3L4 PE=1 SV=1 - [E9PL10_HUMAN]	20.69	2	4	12	145	15.7694	9.14404	0.98228	0.978076	1.00496	0.988439	1.05814	1.00936	1.03074	1.03275	1.04483	0.0540016
O60287	Nucleolar pre-ribosomal-associated protein 1 OS=Homo sapiens GN=URB1 PE=1 SV=4 - [NPA1P_HUMAN]	3.61	7	8	11	2271	254.227	6.46826	1.04639	1.11659	1.06092	1.07463	0.979965	1.03303	0.952263	0.988418	0.919771	0.0540548
Q9Y6D9	Mitotic spindle assembly checkpoint protein MAD1 OS=Homo sapiens GN=MAD1L1 PE=1 SV=2 - [MD1L1_HUMAN]	14.07	8	8	15	718	83.0156	5.92236	1.0545	1.09202	1.00014	1.04889	0.997816	0.897776	0.928203	0.941265	0.897395	0.0540597
D3YTB1	60S ribosomal protein L32 (Fragment) OS=Homo sapiens GN=RPL32 PE=1 SV=1 - [D3YTB1_HUMAN]	57.89	9	9	63	133	15.6067	11.4438	1.06688	1.10282	1.03854	1.06942	0.836508	0.912717	1.01484	0.921356	0.86155	0.0542907
P08727	Keratin, type I cytoskeletal 19 OS=Homo sapiens GN=KRT19 PE=1 SV=4 - [K1C19_HUMAN]	74.75	20	33	580	400	44.0791	5.13525	1.03264	1.01085	1.02293	1.02214	0.928032	0.99792	0.968929	0.96496	0.944058	0.054461
Q96L92	Sorting nexin-27 OS=Homo sapiens GN=SNX27 PE=1 SV=2 - [SNX27_HUMAN]	8.69	5	5	10	541	61.2265	6.49365	0.997205	0.982806	0.990421	0.990144	0.972889	0.966132	0.937456	0.958825	0.96837	0.0545
P31150	Rab GDP dissociation inhibitor alpha OS=Homo sapiens GN=GDI1 PE=1 SV=2 - [GDIA_HUMAN]	40.72	10	14	49	447	50.5501	5.13525	0.95428	0.876503	0.905706	0.912163	0.975144	0.977901	1.04669	0.999912	1.0962	0.0545265
Q53FL4	Adducin 3 isoform a variant (Fragment) OS=Homo sapiens PE=2 SV=1 - [Q53FL4_HUMAN]	5.25	3	3	7	667	74.4339	6.50732	1.04787	0.993931	1.08793	1.04324	0.964147	0.98227	0.925022	0.957146	0.917471	0.0548533
B4DNR3	cDNA FLJ52710, highly similar to Abhydrolase domain-containing protein 14B OS=Homo sapiens PE=2 SV=1 - [B4DNR3_HUMAN]	50.27	7	7	30	185	19.7842	6.40479	1.01055	1.00171	0.98865	1.0003	1.01409	1.05336	1.06053	1.04266	1.04235	0.0549332
P09960	Leukotriene A-4 hydrolase OS=Homo sapiens GN=LTA4H PE=1 SV=2 - [LKHA4_HUMAN]	46.48	22	22	66	611	69.2412	6.17627	0.985583	0.94657	0.987668	0.973274	1.00451	1.01129	1.03528	1.01703	1.04496	0.055001
Q6PIU2	Neutral cholesterol ester hydrolase 1 OS=Homo sapiens GN=NCEH1 PE=1 SV=3 - [NCEH1_HUMAN]	43.38	15	15	103	408	45.7787	7.2251	0.992715	0.987037	1.00276	0.994171	1.0048	1.0418	1.04152	1.02937	1.03541	0.0550109
A8K2Q6	Peptidyl-prolyl cis-trans isomerase OS=Homo sapiens PE=2 SV=1 - [A8K2Q6_HUMAN]	12.74	2	3	6	212	22.7029	8.39697	1.11012	1.00342	1.23194	1.11516	0.874315	0.927354	0.968947	0.923539	0.828166	0.0551669
H0YIC4	Citrate synthase (Fragment) OS=Homo sapiens GN=CS PE=1 SV=1 - [H0YIC4_HUMAN]	46.34	1	6	36	123	14.1144	9.56885	1.00857	0.964608		0.986591	1.07571	1.0987		1.0872	1.10198	0.0557606
Q9UBQ0	Vacuolar protein sorting-associated protein 29 OS=Homo sapiens GN=VPS29 PE=1 SV=1 - [VPS29_HUMAN]	32.97	6	6	23	182	20.4927	6.78564	1.00748	0.958287	0.986415	0.98406	1.01505	1.03845	1.02495	1.02615	1.04277	0.0559594
Q9NRY4	Rho GTPase-activating protein 35 OS=Homo sapiens GN=ARHGAP35 PE=1 SV=3 - [RHG35_HUMAN]	3.8	5	5	10	1499	170.407	6.63916	1.02438	1.01003	1.1174	1.05061	0.966887	0.962136	0.893265	0.940763	0.895449	0.0560838
B4DII5	Importin subunit alpha OS=Homo sapiens PE=2 SV=1 - [B4DII5_HUMAN]	26.45	6	11	38	533	59.6033	5.0083	0.973959	1.02927	0.991045	0.998093	0.956214	0.926933	0.957769	0.946972	0.948781	0.0561021
Q8TDD1	ATP-dependent RNA helicase DDX54 OS=Homo sapiens GN=DDX54 PE=1 SV=2 - [DDX54_HUMAN]	16.46	11	12	18	881	98.5342	10.0229	1.18997	1.21894	0.9998	1.13624	0.709079	0.823117	1.00179	0.844663	0.743387	0.0561601
Q14677	Clathrin interactor 1 OS=Homo sapiens GN=CLINT1 PE=1 SV=1 - [EPN4_HUMAN]	23.68	1	14	46	625	68.2158	6.41748	1.07523	0.974585	1.10702	1.05228	0.914405	0.964803	0.938173	0.939127	0.89247	0.0562028
B2RD27	cDNA, FLJ96428, highly similar to Homo sapiens proteasome (prosome, macropain) 26S subunit, non-ATPase, 7 (Mov34 homolog) (PSMD7), mRNA OS=Homo sapiens PE=2 SV=1 - [B2RD27_HUMAN]	21.3	7	7	30	324	36.9885	6.771	0.869617	0.975719	0.949044	0.93146	1.02597	1.00004	1.03864	1.02155	1.09672	0.0562153
P30046	D-dopachrome decarboxylase OS=Homo sapiens GN=DDT PE=1 SV=3 - [DOPD_HUMAN]	30.51	3	3	24	118	12.7037	7.29834	0.983661	1.03278	0.91842	0.978288	1.07905	1.06229	1.17088	1.10407	1.12858	0.0563997
A0A024RDH6	SEC31-like 1 (S. cerevisiae), isoform CRA_b OS=Homo sapiens GN=SEC31L1 PE=4 SV=1 - [A0A024RDH6_HUMAN]	16.43	17	17	37	1181	128.955	7.40088	1.01291	0.957766	0.949295	0.973323	1.01042	1.05193	1.04861	1.03699	1.06541	0.0566916
Q14676	Mediator of DNA damage checkpoint protein 1 OS=Homo sapiens GN=MDC1 PE=1 SV=3 - [MDC1_HUMAN]	5.46	10	10	18	2089	226.529	5.46533	1.10209	1.18544	1.01091	1.09948	0.919249	0.979148	0.971599	0.956665	0.870108	0.056728
Q9BTQ7	Similar to ribosomal protein L23 (Fragment) OS=Homo sapiens PE=2 SV=1 - [Q9BTQ7_HUMAN]	70.9	8	8	66	134	14.1407	10.2573	1.08506	1.07232	1.06503	1.07413	0.872171	0.898285	1.03842	0.936293	0.871673	0.0567811
B2RBJ8	Glutamyl-tRNA(Gln) amidotransferase subunit A, mitochondrial OS=Homo sapiens GN=QRSL1 PE=2 SV=1 - [B2RBJ8_HUMAN]	4.92	2	2	2	528	57.3961	5.80811	0.896205		0.906107	0.901156	1.11936		1.03278	1.07607	1.1941	0.0568247
P52597	Heterogeneous nuclear ribonucleoprotein F OS=Homo sapiens GN=HNRNPF PE=1 SV=3 - [HNRPF_HUMAN]	28.19	7	9	119	415	45.6429	5.57959	0.998018	1.00304	0.987041	0.996032	1.0323	1.02862	1.00498	1.02197	1.02604	0.0568341
Q96BN8	Ubiquitin thioesterase otulin OS=Homo sapiens GN=OTULIN PE=1 SV=3 - [OTUL_HUMAN]	7.95	3	3	6	352	40.2371	5.46533	0.968183	0.932778	1.00259	0.967851	1.00292	1.06538	1.06687	1.04505	1.07977	0.0571262
B5BU25	U2 small nuclear RNA auxiliary factor 2 isoform b OS=Homo sapiens GN=U2AF2 PE=2 SV=1 - [B5BU25_HUMAN]	26.33	9	9	55	471	53.103	9.08545	1.00182	0.981188	0.960288	0.981097	1.03785	1.04388	1.13934	1.07369	1.09438	0.0571979
P29218	Inositol monophosphatase 1 OS=Homo sapiens GN=IMPA1 PE=1 SV=1 - [IMPA1_HUMAN]	17.69	5	5	8	277	30.1692	5.26221	0.955705	0.922962	0.888473	0.92238	0.968979	0.997514	1.0576	1.00803	1.09286	0.0580592
Q00610	Clathrin heavy chain 1 OS=Homo sapiens GN=CLTC PE=1 SV=5 - [CLH1_HUMAN]	46.75	70	70	493	1675	191.493	5.69385	0.962388	1.00103	0.979969	0.981129	1.05197	1.0016	1.06267	1.03875	1.05873	0.0580617
C9J0K6	Sorcin OS=Homo sapiens GN=SRI PE=1 SV=1 - [C9J0K6_HUMAN]	70.32	10	10	29	155	17.5935	5.60498	0.994052	0.962673	0.910188	0.955638	1.0255	1.00744	1.04838	1.02711	1.07479	0.0582166
P40429	60S ribosomal protein L13a OS=Homo sapiens GN=RPL13A PE=1 SV=2 - [RL13A_HUMAN]	48.77	12	12	56	203	23.5624	10.9312	1.07884	1.06726	1.00728	1.05113	0.859008	0.904834	1.00575	0.923198	0.878293	0.0583379
Q86Y56	Dynein assembly factor 5, axonemal OS=Homo sapiens GN=DNAAF5 PE=1 SV=4 - [DAAF5_HUMAN]	29.59	21	21	57	855	93.4621	6.41748	1.0386	1.06994	1.03388	1.04747	0.930846	0.988297	1.01262	0.977253	0.932963	0.0585048
O75487	Glypican-4 OS=Homo sapiens GN=GPC4 PE=1 SV=4 - [GPC4_HUMAN]	16.73	7	7	11	556	62.3717	6.68311	1.01714	1.16383	1.31689	1.16595	0.982048	0.919841	0.819268	0.907052	0.777949	0.0585752
P31947	14-3-3 protein sigma OS=Homo sapiens GN=SFN PE=1 SV=1 - [1433S_HUMAN]	50	10	14	173	248	27.7567	4.7417	0.990641	0.809555	0.859249	0.886482	1.04558	1.08258	0.997507	1.04189	1.17531	0.0589422
B4DJQ8	cDNA FLJ55694, highly similar to Dipeptidyl-peptidase 1 (EC 3.4.14.1) OS=Homo sapiens PE=2 SV=1 - [B4DJQ8_HUMAN]	29.6	11	11	44	446	50.1192	6.99072	0.988896	1.04226	1.07596	1.03571	0.977546	0.93654	0.970547	0.961544	0.928396	0.0589544
H3BR35	Eukaryotic peptide chain release factor GTP-binding subunit ERF3A (Fragment) OS=Homo sapiens GN=GSPT1 PE=1 SV=1 - [H3BR35_HUMAN]	39.79	8	19	80	475	52.9087	5.63037	1.00649	0.928168	0.927435	0.954032	1.05265	1.03438	1.00604	1.03102	1.0807	0.05959
E5RFJ9	Store-operated calcium entry-associated regulatory factor (Fragment) OS=Homo sapiens GN=SARAF PE=1 SV=1 - [E5RFJ9_HUMAN]	24.49	2	2	3	147	16.0748	5.49072		1.01976	1.15894	1.08935		0.825668	0.775744	0.800706	0.735031	0.0597852
E5KLM1	Mitochondrial dynamin-like 120 kDa protein OS=Homo sapiens PE=3 SV=1 - [E5KLM1_HUMAN]	40.52	36	36	120	997	115.839	7.86963	1.00808	1.00223	1.01223	1.00751	0.98649	1.00027	0.996501	0.99442	0.987005	0.0598967
B4DMD3	cDNA FLJ58174, highly similar to WW domain-binding protein 11 OS=Homo sapiens PE=2 SV=1 - [B4DMD3_HUMAN]	24.62	13	13	50	589	64.8671	7.00537	1.0002	0.989628	0.97539	0.988405	1.01559	1.05745	1.01515	1.0294	1.04148	0.0599838
P05387	60S acidic ribosomal protein P2 OS=Homo sapiens GN=RPLP2 PE=1 SV=1 - [RLA2_HUMAN]	92.17	5	8	100	115	11.6578	4.53857	1.0975	1.08592	1.02537	1.06959	1.02916	0.90388	0.932109	0.95505	0.89291	0.0600005
A0A0U1RQV4	Rho-associated protein kinase 1 OS=Homo sapiens GN=ROCK1 PE=1 SV=1 - [A0A0U1RQV4_HUMAN]	8.18	7	9	11	1137	132.987	5.35107	0.928083	0.897108	0.962464	0.929218	1.06834	1.02664	0.966389	1.02046	1.09819	0.060086
P53680	AP-2 complex subunit sigma OS=Homo sapiens GN=AP2S1 PE=1 SV=2 - [AP2S1_HUMAN]	24.65	2	3	5	142	17.0067	6.17627	1.03285	0.8755	0.919442	0.942598	1.07647	1.0763	1.04794	1.0669	1.13188	0.0601024
K7EPL5	Evolutionarily conserved-signaling intermediate in Toll pathway, mitochondrial (Fragment) OS=Homo sapiens GN=ECSIT PE=1 SV=1 - [K7EPL5_HUMAN]	17.62	3	3	8	227	25.9416	9.83252	0.847373	0.938193	0.988666	0.924744	1.11864	1.00605	1.0596	1.06143	1.14781	0.0601198
Q13572	Inositol-tetrakisphosphate 1-kinase OS=Homo sapiens GN=ITPK1 PE=1 SV=2 - [ITPK1_HUMAN]	9.66	4	4	6	414	45.5921	6.16357	0.939518	0.994236	1.15318	1.02898	0.890416	0.85483	0.77045	0.838565	0.814949	0.0601717
Q9NWZ8	Gem-associated protein 8 OS=Homo sapiens GN=GEMIN8 PE=1 SV=1 - [GEMI8_HUMAN]	13.22	3	3	3	242	28.6186	6.80029	1.03717	1.01765	1.09566	1.05016	0.99124	0.914096	0.821417	0.908917	0.865503	0.0602734
S4R3N1	Protein HSPE1-MOB4 OS=Homo sapiens GN=HSPE1-MOB4 PE=3 SV=1 - [S4R3N1_HUMAN]	32.18	4	8	51	261	29.7177	6.16357	0.930359	0.988833	0.932348	0.950514	0.991151	1.00997	1.00623	1.00245	1.05464	0.0603528
D6R9S7	Solute carrier family 41 member 3 (Fragment) OS=Homo sapiens GN=SLC41A3 PE=1 SV=1 - [D6R9S7_HUMAN]	20.39	2	2	3	152	16.4194	5.05908	0.934588		0.853403	0.893995	1.13152		1.06462	1.09807	1.22827	0.0604696
B3KN45	cDNA FLJ13521 fis, clone PLACE1005876, highly similar to Cleavage and polyadenylation specificity factor 100 kDa subunit OS=Homo sapiens PE=2 SV=1 - [B3KN45_HUMAN]	13.04	7	7	23	690	78.1424	5.07178	1.01282	1.01438	1.00918	1.01212	0.932925	0.9922	0.97424	0.966455	0.954877	0.0605227
Q5JTD5	cDNA FLJ50818, highly similar to Protein YIPF3 OS=Homo sapiens PE=2 SV=1 - [Q5JTD5_HUMAN]	8.57	3	3	5	315	34.9251	6.26514	1.0402	1.02965	1.14957	1.07314	0.97636	0.975208	0.969562	0.97371	0.907345	0.0606985
Q9HB71	Calcyclin-binding protein OS=Homo sapiens GN=CACYBP PE=1 SV=2 - [CYBP_HUMAN]	53.07	12	12	60	228	26.1936	8.25049	0.937689	0.978196	0.89168	0.935855	1.02352	0.992296	0.998846	1.00489	1.07376	0.0612151
C9JBY7	28S ribosomal protein S33, mitochondrial OS=Homo sapiens GN=MRPS33 PE=1 SV=1 - [C9JBY7_HUMAN]	9.38	1	1	3	96	11.4491	10.1694	0.982243	0.922523	0.929842	0.944869	1.00186	1.11362	1.02218	1.04589	1.10691	0.0614344
Q9UF71	Putative uncharacterized protein DKFZp434J1672 (Fragment) OS=Homo sapiens GN=DKFZp434J1672 PE=2 SV=1 - [Q9UF71_HUMAN]	5	2	2	5	580	65.9894	7.18115		1.14858	1.35691	1.25275		0.834407	0.862593	0.8485	0.677311	0.0614455
Q499Z2	Hexosyltransferase (Fragment) OS=Homo sapiens GN=B3GALT6 PE=2 SV=1 - [Q499Z2_HUMAN]	7.24	2	2	4	304	34.4678	9.26123	1.05799	1.17954	0.978199	1.07191	0.861445	0.934531	0.931127	0.909034	0.848052	0.0615035
Q8WWC4	Uncharacterized protein C2orf47, mitochondrial OS=Homo sapiens GN=C2orf47 PE=1 SV=1 - [CB047_HUMAN]	19.59	6	6	22	291	32.524	9.17334	0.95285	0.979116	0.831711	0.921226	1.02358	1.0553	1.04216	1.04035	1.12931	0.0618631
Q15050	Ribosome biogenesis regulatory protein homolog OS=Homo sapiens GN=RRS1 PE=1 SV=2 - [RRS1_HUMAN]	24.93	10	10	21	365	41.1682	10.6968	1.1864	1.17947	0.978557	1.11481	0.698659	0.799363	0.995231	0.831084	0.745495	0.0622442
H3BLV0	Complement decay-accelerating factor (Fragment) OS=Homo sapiens GN=CD55 PE=1 SV=1 - [H3BLV0_HUMAN]	12.58	5	5	10	326	35.7825	5.5415	1.01517	0.847155	0.864986	0.909102	1.01698	1.06013	1.09814	1.05842	1.16424	0.0623047
F5GX77	Multifunctional methyltransferase subunit TRM112-like protein OS=Homo sapiens GN=TRMT112 PE=1 SV=1 - [F5GX77_HUMAN]	50	4	4	17	106	11.9643	8.07471	1.04137	1.07825	1.0157	1.0451	0.857972	0.855811	1.00845	0.907411	0.868249	0.0623215
B4DIW9	Serine/threonine-protein phosphatase 6 regulatory ankyrin repeat subunit A OS=Homo sapiens GN=ANKRD28 PE=1 SV=1 - [B4DIW9_HUMAN]	3.74	2	2	3	722	77.6969	6.99072	0.98	0.865689	0.900321	0.915337	0.974823	1.07261	1.12426	1.05723	1.15502	0.0624498
Q07020	60S ribosomal protein L18 OS=Homo sapiens GN=RPL18 PE=1 SV=2 - [RL18_HUMAN]	42.02	7	7	81	188	21.6211	11.7222	1.07294	1.07501	0.977977	1.04198	0.843899	0.886914	0.986913	0.905908	0.869413	0.0624537
Q9Y394	Dehydrogenase/reductase SDR family member 7 OS=Homo sapiens GN=DHRS7 PE=1 SV=1 - [DHRS7_HUMAN]	19.47	6	6	17	339	38.2741	8.32373	0.893697	0.976198	0.839277	0.903057	1.22781	1.01228	1.05832	1.09947	1.2175	0.0625218
A0A1B0GU48	Histone-lysine N-methyltransferase EHMT1 (Fragment) OS=Homo sapiens GN=EHMT1 PE=4 SV=1 - [A0A1B0GU48_HUMAN]	7.65	6	6	11	981	105.817	6.03662	1.00612	1.05204	1.11952	1.05923	0.985701	0.947017	0.855664	0.929461	0.877491	0.0626788
Q7Z4V5	Hepatoma-derived growth factor-related protein 2 OS=Homo sapiens GN=HDGFRP2 PE=1 SV=1 - [HDGR2_HUMAN]	14.61	8	9	18	671	74.2722	7.48877	1.02685	0.9939	0.998737	1.0065	0.844896	0.95366	0.943344	0.913967	0.908067	0.0626804
P05114	Non-histone chromosomal protein HMG-14 OS=Homo sapiens GN=HMGN1 PE=1 SV=3 - [HMGN1_HUMAN]	41	5	5	27	100	10.6526	9.59814	1.01342	0.921656	0.910286	0.948455	1.03476	1.09259	1.02048	1.04928	1.1063	0.0626947
O75157	TSC22 domain family protein 2 OS=Homo sapiens GN=TSC22D2 PE=1 SV=3 - [T22D2_HUMAN]	2.05	1	2	3	780	79.1794	5.021		0.91659	0.893876	0.905233		1.08874	1.01494	1.05184	1.16195	0.0628884
P62854	40S ribosomal protein S26 OS=Homo sapiens GN=RPS26 PE=1 SV=3 - [RS26_HUMAN]	50.43	5	5	47	115	13.0071	11.0044	1.06573	1.06457	0.994605	1.04163	0.832375	0.882591	0.996463	0.90381	0.867684	0.0629548
P30519	Heme oxygenase 2 OS=Homo sapiens GN=HMOX2 PE=1 SV=2 - [HMOX2_HUMAN]	35.76	9	9	24	316	36.0098	5.41455	0.931695	0.960733	1.00568	0.966037	1.05685	1.04039	1.00428	1.03384	1.07018	0.0629827
B4E240	cDNA FLJ58827, highly similar to UBX domain-containing protein 2 OS=Homo sapiens PE=2 SV=1 - [B4E240_HUMAN]	12.45	5	5	17	490	54.9169	6.63916	0.997845	1.01289	1.04492	1.01855	0.955504	0.946078	0.831932	0.911171	0.894576	0.0631398
P49915	GMP synthase [glutamine-hydrolyzing] OS=Homo sapiens GN=GMPS PE=1 SV=1 - [GUAA_HUMAN]	50.36	33	33	158	693	76.667	6.87354	0.995206	0.962045	0.97105	0.9761	1.00079	1.02167	0.999467	1.00731	1.03197	0.0632635
B4DWS9	cDNA FLJ57640, highly similar to Serpin B5 OS=Homo sapiens PE=2 SV=1 - [B4DWS9_HUMAN]	58.89	1	14	90	287	32.4394	6.53662	0.927851	0.902503	0.879752	0.903369	1.1589	1.03715	0.963232	1.05309	1.16574	0.0632925
Q53HM1	Uridine kinase (Fragment) OS=Homo sapiens PE=2 SV=1 - [Q53HM1_HUMAN]	5.66	3	3	4	548	61.1626	7.35693	1.14892	1.05045		1.09969	0.864397	0.91549		0.889944	0.80927	0.0633605
Q96DA6	Mitochondrial import inner membrane translocase subunit TIM14 OS=Homo sapiens GN=DNAJC19 PE=1 SV=3 - [TIM14_HUMAN]	25.86	3	3	12	116	12.4907	10.0962	1.01701	1.00587	1.01153	1.01147	1.01946	1.0186	1.02332	1.02046	1.00889	0.0634664
O15031	Plexin-B2 OS=Homo sapiens GN=PLXNB2 PE=1 SV=3 - [PLXB2_HUMAN]	9.09	11	12	22	1838	204.997	6.23975	1.03206	0.995844	1.04215	1.02335	0.916415	0.979284	0.980415	0.958705	0.936828	0.0635935
Q93009	Ubiquitin carboxyl-terminal hydrolase 7 OS=Homo sapiens GN=USP7 PE=1 SV=2 - [UBP7_HUMAN]	30.67	33	33	114	1102	128.22	5.5542	1.00937	0.971271	0.967244	0.98263	1.01048	1.03129	1.0651	1.03562	1.05393	0.063622
O43776	Asparagine--tRNA ligase, cytoplasmic OS=Homo sapiens GN=NARS PE=1 SV=1 - [SYNC_HUMAN]	37.23	17	17	95	548	62.9025	6.25244	0.947139	1.00182	0.941184	0.96338	1.08038	1.00292	1.03322	1.03884	1.07833	0.0637542
A8K3S1	Glucosamine-6-phosphate isomerase OS=Homo sapiens PE=2 SV=1 - [A8K3S1_HUMAN]	36.33	4	9	25	289	32.6576	6.91748	1.00816	0.894506	0.888518	0.930396	0.997099	1.13987	1.09009	1.07569	1.15616	0.0638075
Q02543	60S ribosomal protein L18a OS=Homo sapiens GN=RPL18A PE=1 SV=2 - [RL18A_HUMAN]	48.3	9	9	66	176	20.7489	10.7114	1.10775	1.07019	0.981861	1.05327	0.806967	0.888433	0.983095	0.892831	0.847678	0.0638206
A0A0C4DGX4	Cullin-1 OS=Homo sapiens GN=CUL1 PE=1 SV=1 - [A0A0C4DGX4_HUMAN]	18.22	12	12	27	752	87.3328	7.47412	0.959	0.948317	1.00847	0.971928	1.06078	1.02247	1.01263	1.03196	1.06176	0.0640476
O60701	UDP-glucose 6-dehydrogenase OS=Homo sapiens GN=UGDH PE=1 SV=1 - [UGDH_HUMAN]	45.95	21	21	133	494	54.9893	7.12256	0.89363	0.879449	0.939828	0.904303	1.10357	0.986329	0.970911	1.02027	1.12824	0.0640774
Q5T0Z8	Uncharacterized protein C6orf132 OS=Homo sapiens GN=C6orf132 PE=1 SV=4 - [CF132_HUMAN]	5.22	4	4	8	1188	123.958	9.45166	1.0692	1.14526	0.97984	1.06477	0.874412	0.967707	0.933223	0.925114	0.868843	0.0640947
H0YM23	Ankyrin repeat domain-containing protein 17 (Fragment) OS=Homo sapiens GN=ANKRD17 PE=1 SV=1 - [H0YM23_HUMAN]	7.84	6	14	28	2487	263.202	6.37939	0.999801	1.05779	1.12824	1.06194	0.997807	0.912692	0.930563	0.947021	0.891781	0.0641232
Q9C0D5	Protein TANC1 OS=Homo sapiens GN=TANC1 PE=1 SV=3 - [TANC1_HUMAN]	6.07	9	9	12	1861	202.093	8.32373	0.995975	0.996283	1.12009	1.03745	0.92549	0.933726	0.937393	0.932203	0.898553	0.0641252
Q5BKZ1	DBIRD complex subunit ZNF326 OS=Homo sapiens GN=ZNF326 PE=1 SV=2 - [ZN326_HUMAN]	23.88	12	12	37	582	65.6131	5.14795	0.987434	0.961797	0.994195	0.981142	1.03598	1.07247	1.00372	1.03739	1.05733	0.0641987
A0A024RAJ8	IQ motif containing GTPase activating protein 2, isoform CRA_b OS=Homo sapiens GN=IQGAP2 PE=4 SV=1 - [A0A024RAJ8_HUMAN]	18.35	24	28	56	1575	180.48	5.57959	1.00668	1.05165	1.06188	1.04007	0.981033	0.964555	1.0103	0.985296	0.947336	0.0642136
Q13283	Ras GTPase-activating protein-binding protein 1 OS=Homo sapiens GN=G3BP1 PE=1 SV=1 - [G3BP1_HUMAN]	35.62	12	13	142	466	52.1321	5.51611	1.02206	0.978184	1.03355	1.01126	0.936633	0.982538	0.95028	0.956484	0.945829	0.0648459
Q96CW5	Gamma-tubulin complex component 3 OS=Homo sapiens GN=TUBGCP3 PE=1 SV=2 - [GCP3_HUMAN]	15.21	11	11	18	907	103.506	8.11865	0.996927	1.02582	1.02261	1.01512	0.997907	0.94476	0.966863	0.969843	0.955398	0.0649216
M0R064	Mediator of RNA polymerase II transcription subunit 26 (Fragment) OS=Homo sapiens GN=MED26 PE=4 SV=1 - [M0R064_HUMAN]	9.86	1	2	3	213	23.3545	10.77		0.927048	0.995423	0.961236		1.20599	1.12148	1.16374	1.21067	0.0650894
P12277	Creatine kinase B-type OS=Homo sapiens GN=CKB PE=1 SV=1 - [KCRB_HUMAN]	20.73	6	6	20	381	42.6173	5.59229	1.06769	0.983729	1.10355	1.05166	0.895722	0.995369	0.896163	0.929085	0.88345	0.0651096
Q15397	Pumilio homolog 3 OS=Homo sapiens GN=PUM3 PE=1 SV=3 - [PUM3_HUMAN]	23.3	12	12	23	648	73.5383	9.64209	1.13692	1.10356	1.0511	1.0972	0.810537	0.838559	1.04704	0.898711	0.819099	0.0651555
O15195	Villin-like protein OS=Homo sapiens GN=VILL PE=2 SV=3 - [VILL_HUMAN]	9.23	7	7	9	856	95.8473	7.02002	0.912699	0.972725		0.942712	1.09441	1.0561		1.07526	1.1406	0.0651888
B4DGE7	cDNA FLJ61235, weakly similar to WD repeat protein YBL104C OS=Homo sapiens PE=2 SV=1 - [B4DGE7_HUMAN]	1.71	1	1	2	875	98.574	6.80029		1.01642	0.940532	0.978474		0.786135	0.835012	0.810574	0.828406	0.06526
H0YMB3	GMP reductase OS=Homo sapiens GN=GMPR2 PE=1 SV=1 - [H0YMB3_HUMAN]	26.35	8	8	16	315	33.9	6.91748	1.01169	0.982392	0.9433	0.979125	1.03969	1.05167	1.01573	1.0357	1.05778	0.0653588
Q9BV86	N-terminal Xaa-Pro-Lys N-methyltransferase 1 OS=Homo sapiens GN=NTMT1 PE=1 SV=3 - [NTM1A_HUMAN]	19.73	4	4	13	223	25.3708	5.51611	0.961717	1.00165	0.917004	0.960122	1.07954	1.01037	1.03124	1.04038	1.08359	0.0656089
Q86WN0	Putative uncharacterized protein OS=Homo sapiens PE=2 SV=1 - [Q86WN0_HUMAN]	21.46	1	4	7	261	27.462	4.70361	0.946312	1.07413	1.03754	1.01933	0.93495	0.927759	0.888119	0.916943	0.899558	0.0656604
P10768	S-formylglutathione hydrolase OS=Homo sapiens GN=ESD PE=1 SV=2 - [ESTD_HUMAN]	43.62	9	9	34	282	31.4425	7.02002	0.926412	0.990943	0.990568	0.969307	1.05093	1.05045	1.00499	1.03546	1.06824	0.0657473
A8K4B4	cDNA FLJ78441, highly similar to Homo sapiens nucleolar and spindle associated protein 1 (NUSAP1),mRNA OS=Homo sapiens PE=2 SV=1 - [A8K4B4_HUMAN]	15.87	5	5	11	441	49.4089	9.89111	1.02844	1.17288	1.28738	1.1629	1.00617	0.918225	0.96751	0.963967	0.828934	0.0657514
P16403	Histone H1.2 OS=Homo sapiens GN=HIST1H1C PE=1 SV=2 - [H12_HUMAN]	47.42	5	14	182	213	21.3517	10.9312	1.10568	1.22775	1.00804	1.11382	0.66085	0.707315	1.01303	0.793732	0.712619	0.0659441
Q9BT67	NEDD4 family-interacting protein 1 OS=Homo sapiens GN=NDFIP1 PE=1 SV=1 - [NFIP1_HUMAN]	8.14	2	2	5	221	24.8834	4.67822	1.0198	1.02572	1.07028	1.0386	0.969052	0.946912	0.812567	0.909511	0.875707	0.0660254
B4DYZ1	cDNA FLJ59786, highly similar to Probable ATP-dependent RNA helicase DDX31 (EC 3.6.1.-) OS=Homo sapiens PE=2 SV=1 - [B4DYZ1_HUMAN]	2.22	2	2	2	722	80.8809	9.83252	1.07737		1.05659	1.06698	0.837472		0.933544	0.885508	0.829922	0.0661525
B4DQK1	cDNA FLJ53475, highly similar to Autophagy-related protein 7 OS=Homo sapiens PE=2 SV=1 - [B4DQK1_HUMAN]	4.41	3	3	6	681	75.458	6.23975	0.837777	0.941249	0.9459	0.908309	1.04472	0.983536	1.15191	1.06005	1.16706	0.0663421
Q5H943	Kita-kyushu lung cancer antigen 1 OS=Homo sapiens GN=CT83 PE=1 SV=1 - [KKLC1_HUMAN]	20.35	2	2	6	113	12.7757	10.1987	1.04237	1.04001	1.12367	1.06868	1.02642	0.942572	0.937769	0.968921	0.906649	0.0663438
H7C2W9	60S ribosomal protein L31 (Fragment) OS=Homo sapiens GN=RPL31 PE=1 SV=1 - [H7C2W9_HUMAN]	46.3	8	8	66	108	12.8031	11.0044	1.09801	1.09423	0.979254	1.05716	0.88335	0.857917	0.996482	0.912583	0.863238	0.0664404
B1AUU8	Epidermal growth factor receptor substrate 15 OS=Homo sapiens GN=EPS15 PE=1 SV=1 - [B1AUU8_HUMAN]	11.94	8	8	11	762	83.6028	4.70361	0.960102	0.98659	0.965326	0.970673	0.987659	1.00211	1.02626	1.00534	1.03572	0.0668004
B3KTA3	Fascin OS=Homo sapiens PE=2 SV=1 - [B3KTA3_HUMAN]	29.87	14	14	59	472	52.244	7.6499	0.970807	0.90471	0.927311	0.934276	0.964783	1.01564	1.01511	0.998511	1.06875	0.0668236
H7C2A6	Cysteine protease ATG4B (Fragment) OS=Homo sapiens GN=ATG4B PE=1 SV=1 - [H7C2A6_HUMAN]	16.58	2	2	5	193	21.1893	5.03369	1.13965	1.01577	1.04161	1.06568	0.926136	0.946414	0.998843	0.957131	0.898145	0.0671299
B4DIK4	Alpha-mannosidase OS=Homo sapiens PE=2 SV=1 - [B4DIK4_HUMAN]	2.57	1	2	6	778	88.0084	7.31299		1.1001	1.23152	1.16581		0.930836	0.917269	0.924052	0.792628	0.0672202
J3KRJ3	Mitochondrial import inner membrane translocase subunit Tim21 OS=Homo sapiens GN=TIMM21 PE=1 SV=1 - [J3KRJ3_HUMAN]	5.81	1	1	2	172	19.2473	10.1987	1.11945		1.06015	1.0898	0.976911		0.933237	0.955074	0.876376	0.0672494
B4DHG3	cDNA FLJ55329, highly similar to Procollagen-lysine,2-oxoglutarate5-dioxygenase 2 (EC 1.14.11.4) OS=Homo sapiens PE=2 SV=1 - [B4DHG3_HUMAN]	10.24	6	6	12	703	81.0887	6.65381	0.995696	1.24943	1.3974	1.21418	1.00468	0.85005	0.731485	0.862073	0.710005	0.0675653
P39019	40S ribosomal protein S19 OS=Homo sapiens GN=RPS19 PE=1 SV=2 - [RS19_HUMAN]	62.07	12	12	121	145	16.0505	10.3159	1.07038	1.0414	1.01786	1.04321	0.899844	0.886881	1.01611	0.934279	0.895579	0.0677188
Q6YHU6	Thyroid adenoma-associated protein OS=Homo sapiens GN=THADA PE=1 SV=1 - [THADA_HUMAN]	1.48	3	3	5	1953	219.465	6.06201	1.01917	1.03823	1.03276	1.03005	0.967778	0.92465	1.00978	0.967403	0.939177	0.0679067
P61160	Actin-related protein 2 OS=Homo sapiens GN=ACTR2 PE=1 SV=1 - [ARP2_HUMAN]	29.44	10	10	68	394	44.7322	6.7417	0.984641	0.983137	0.999791	0.98919	0.999002	1.03021	1.04228	1.02383	1.03502	0.0679486
E5RHX8	Transcription and mRNA export factor ENY2 OS=Homo sapiens GN=ENY2 PE=1 SV=1 - [E5RHX8_HUMAN]	24	2	2	6	100	11.3082	9.20264	0.917667	0.98674	0.784769	0.896392	1.09645	1.04121	1.02285	1.0535	1.17527	0.0679501
O14662	Syntaxin-16 OS=Homo sapiens GN=STX16 PE=1 SV=3 - [STX16_HUMAN]	9.54	3	3	4	325	37.0082	6.11279	1.00227	0.934155	0.927853	0.954759	1.08143	0.995346	1.12972	1.06883	1.11948	0.0680479
B2R6Z9	cDNA, FLJ93200, highly similar to Homo sapiens dolichyl-phosphate (UDP-N-acetylglucosamine)N- acetylglucosaminephosphotransferase 1 (GlcNAc-1-P transferase)(DPAGT1), mRNA OS=Homo sapiens PE=2 SV=1 - [B2R6Z9_HUMAN]	7.5	4	4	10	400	45.0681	8.14795	0.912109	0.956569	1.0027	0.957128	1.0993	1.08291	0.996394	1.05953	1.10699	0.0681038
A0A0G2JNW7	Solute carrier family 12 member 7 OS=Homo sapiens GN=SLC12A7 PE=1 SV=1 - [A0A0G2JNW7_HUMAN]	11.63	9	9	22	1083	119.059	6.7124	1.02356	1.0796	0.977475	1.02688	0.878911	0.876193	0.983364	0.912823	0.888929	0.0682684
P82663	28S ribosomal protein S25, mitochondrial OS=Homo sapiens GN=MRPS25 PE=1 SV=1 - [RT25_HUMAN]	23.7	3	3	12	173	20.1033	8.82178	0.969919	0.96586	0.893932	0.943237	0.992504	1.01678	1.0693	1.0262	1.08795	0.068516
B2RAK1	cDNA, FLJ94965, highly similar to Homo sapiens leucyl/cystinyl aminopeptidase (LNPEP), mRNA OS=Homo sapiens PE=2 SV=1 - [B2RAK1_HUMAN]	7.9	7	7	11	1025	117.27	5.73193	0.939062	0.949829	1.0275	0.972131	1.04453	1.04785	1.03338	1.04192	1.07179	0.0686068
Q9BYG5	Partitioning defective 6 homolog beta OS=Homo sapiens GN=PARD6B PE=1 SV=1 - [PAR6B_HUMAN]	6.18	2	2	2	372	41.157	5.57959	0.897032	0.970083		0.933558	1.07364	1.13221		1.10292	1.18142	0.0686344
C9K025	60S ribosomal protein L35a (Fragment) OS=Homo sapiens GN=RPL35A PE=1 SV=1 - [C9K025_HUMAN]	54.26	6	6	31	94	10.6387	10.7114	1.12198	1.04547	1.05644	1.07463	0.797448	0.932803	1.00659	0.912279	0.848923	0.0689562
Q2NLD4	PURA protein (Fragment) OS=Homo sapiens GN=PURA PE=2 SV=1 - [Q2NLD4_HUMAN]	20.35	5	5	10	285	31.9952	7.04932	1.01904	1.007	0.93197	0.986004	1.05037	1.08186	1.04491	1.05905	1.07408	0.0689607
Q9H9A6	Leucine-rich repeat-containing protein 40 OS=Homo sapiens GN=LRRC40 PE=1 SV=1 - [LRC40_HUMAN]	10.13	6	7	13	602	68.2071	6.43018	1.02751	1.00543	1.0309	1.02128	0.971741	1.00814	0.985756	0.988544	0.967946	0.0691828
Q08945	FACT complex subunit SSRP1 OS=Homo sapiens GN=SSRP1 PE=1 SV=1 - [SSRP1_HUMAN]	33.57	21	21	82	709	81.0244	6.87354	1.01036	0.988936	0.95837	0.98589	1.00864	1.09561	1.08131	1.06185	1.07705	0.0696054
M0R0F0	40S ribosomal protein S5 (Fragment) OS=Homo sapiens GN=RPS5 PE=1 SV=1 - [M0R0F0_HUMAN]	36.5	8	8	75	200	22.3768	9.5542	1.10446	1.1193	1.01925	1.081	0.889557	0.862618	1.03469	0.928956	0.859347	0.0698631
O43399	Tumor protein D54 OS=Homo sapiens GN=TPD52L2 PE=1 SV=2 - [TPD54_HUMAN]	45.63	8	8	35	206	22.2243	5.36377	0.985529	0.955045	0.884508	0.941694	0.988221	1.06253	1.05375	1.03483	1.09891	0.070405
B4DIN7	cDNA FLJ55648, highly similar to NEDD4-like E3 ubiquitin-protein ligase WWP2 (EC 6.3.2.-) OS=Homo sapiens PE=2 SV=1 - [B4DIN7_HUMAN]	4.89	3	3	9	757	86.6876	6.46826	0.956118	1.10592	1.1167	1.05958	0.878137	0.885824	0.973022	0.912327	0.861027	0.0704262
Q9NUQ6	SPATS2-like protein OS=Homo sapiens GN=SPATS2L PE=1 SV=2 - [SPS2L_HUMAN]	36.74	16	16	61	558	61.6907	9.64209	0.998119	1.04643	1.08904	1.04453	0.978496	0.982614	0.905186	0.955432	0.914698	0.0704335
Q53EQ3	Gamma-tubulin complex component (Fragment) OS=Homo sapiens PE=2 SV=1 - [Q53EQ3_HUMAN]	17.54	12	12	18	901	102.384	6.84424	0.999264	1.01131	1.03187	1.01415	0.967848	0.982172	0.997858	0.982626	0.968914	0.0705354
O15372	Eukaryotic translation initiation factor 3 subunit H OS=Homo sapiens GN=EIF3H PE=1 SV=1 - [EIF3H_HUMAN]	42.9	15	15	41	352	39.9051	6.53662	1.06058	0.999553	1.09314	1.05109	0.929368	1.01101	0.91595	0.952109	0.905832	0.0705889
Q13838	Spliceosome RNA helicase DDX39B OS=Homo sapiens GN=DDX39B PE=1 SV=1 - [DX39B_HUMAN]	40.19	7	19	142	428	48.9599	5.66846	0.974823	0.984375	0.934803	0.964667	1.00869	0.995357	1.04391	1.01599	1.0532	0.0707739
B4DJ75	Serine/threonine-protein phosphatase OS=Homo sapiens PE=2 SV=1 - [B4DJ75_HUMAN]	42.47	2	12	98	299	34.099	6.16357	0.983639	0.975912	0.946593	0.968715	0.985648	1.05804	1.05986	1.03452	1.06793	0.0708676
Q8N1G4	Leucine-rich repeat-containing protein 47 OS=Homo sapiens GN=LRRC47 PE=1 SV=1 - [LRC47_HUMAN]	46.14	25	25	112	583	63.4337	8.27979	0.981774	0.972831	0.935069	0.963225	0.993889	1.0341	1.00068	1.00955	1.0481	0.0708769
F8VVT7	Charged multivesicular body protein 1a OS=Homo sapiens GN=CHMP1A PE=1 SV=1 - [F8VVT7_HUMAN]	16.04	4	4	6	187	20.7737	7.1958	1.06036	1.04725	1.08246	1.06336	0.947843	1.02628	0.863633	0.945919	0.889558	0.0709828
Q53GB6	Actin related protein 2/3 complex subunit 1A variant (Fragment) OS=Homo sapiens PE=2 SV=1 - [Q53GB6_HUMAN]	11.23	4	4	9	365	40.9274	8.03076	0.982864	0.954112	1.03399	0.990323	1.04536	1.03976	1.06994	1.05169	1.06196	0.0710656
P05161	Ubiquitin-like protein ISG15 OS=Homo sapiens GN=ISG15 PE=1 SV=5 - [ISG15_HUMAN]	33.94	5	5	12	165	17.8763	7.44482	0.978488	0.964941	0.904135	0.949188	1.10045	1.05011	0.987593	1.04605	1.10205	0.0719382
O15541	RING finger protein 113A OS=Homo sapiens GN=RNF113A PE=1 SV=1 - [R113A_HUMAN]	2.04	1	1	2	343	38.7626	5.69385		0.771016	0.706527	0.738771		0.939764	1.07939	1.00958	1.36657	0.0720347
Q7Z637	PTPN18 protein OS=Homo sapiens PE=2 SV=1 - [Q7Z637_HUMAN]	11.11	1	2	4	351	38.2933	8.5874		1.01828	1.16107	1.08968		0.808549	0.848691	0.82862	0.760428	0.0720882
B4DMA8	Kinesin-like protein OS=Homo sapiens PE=2 SV=1 - [B4DMA8_HUMAN]	6.56	3	3	6	549	60.4759	6.69775	0.96953	0.997168	0.975249	0.980649	1.16114	1.21264	1.01146	1.12841	1.15068	0.0723313
Q8ND26	Putative uncharacterized protein DKFZp434L1215 (Fragment) OS=Homo sapiens GN=DKFZp434L1215 PE=2 SV=2 - [Q8ND26_HUMAN]	21.79	1	1	2	78	9.02383	9.74463		1.12968	1.23993	1.1848		0.847748	0.962611	0.905179	0.763992	0.0723604
B4E0N6	cDNA FLJ56280, highly similar to Endoplasmic reticulum-Golgi intermediate compartment protein 1 OS=Homo sapiens PE=2 SV=1 - [B4E0N6_HUMAN]	17.45	4	4	6	235	26.2424	8.6167	0.986363	1.05984	1.0632	1.03647	0.985324	0.975991	0.941109	0.967475	0.933436	0.0723914
Q9UHQ9	NADH-cytochrome b5 reductase 1 OS=Homo sapiens GN=CYB5R1 PE=1 SV=1 - [NB5R1_HUMAN]	17.7	5	5	9	305	34.0732	9.37842	0.925409	0.9569	1.0275	0.969936	1.11768	1.02197	1.06783	1.06916	1.1023	0.0723943
H3BPJ9	NADH dehydrogenase [ubiquinone] 1 beta subcomplex subunit 10 OS=Homo sapiens GN=NDUFB10 PE=1 SV=1 - [H3BPJ9_HUMAN]	36.02	5	5	16	161	19.2456	8.70459	1.08537	1.07489	1.11844	1.0929	0.870769	1.05133	0.965499	0.962533	0.880713	0.0724083
O15144	Actin-related protein 2/3 complex subunit 2 OS=Homo sapiens GN=ARPC2 PE=1 SV=1 - [ARPC2_HUMAN]	36	11	11	56	300	34.3115	7.35693	0.998068	0.977461	0.945441	0.973657	0.996667	1.0338	1.03306	1.02118	1.04881	0.0725304
Q13405	39S ribosomal protein L49, mitochondrial OS=Homo sapiens GN=MRPL49 PE=1 SV=1 - [RM49_HUMAN]	41.57	6	6	17	166	19.1859	9.45166	0.994321	0.929234	0.925104	0.949553	0.989958	1.08173	1.02961	1.03377	1.08869	0.072579
O75400	Pre-mRNA-processing factor 40 homolog A OS=Homo sapiens GN=PRPF40A PE=1 SV=2 - [PR40A_HUMAN]	12.64	10	11	35	957	108.737	7.56201	1.01421	0.947794	0.974295	0.978765	1.12829	1.00723	1.10351	1.07967	1.1031	0.0726073
B4DJX1	Acetyltransferase component of pyruvate dehydrogenase complex OS=Homo sapiens PE=2 SV=1 - [B4DJX1_HUMAN]	19.8	10	10	48	591	62.6576	5.73193	1.00742	1.00338	1.00157	1.00412	1.02171	1.03355	1.07492	1.04339	1.03911	0.0727185
B4DWA1	Brain-specific angiogenesis inhibitor 1-associated protein 2 OS=Homo sapiens GN=BAIAP2 PE=1 SV=1 - [B4DWA1_HUMAN]	8.53	3	3	11	375	40.6334	9.05615	1.09575	1.09662	1.01375	1.06871	0.874281	0.905467	1.02918	0.93631	0.876113	0.0727359
E7EW69	Septin-10 OS=Homo sapiens GN=SEPT10 PE=1 SV=1 - [E7EW69_HUMAN]	14.44	4	5	19	450	52.1124	6.91748	0.953897	0.909253	0.960621	0.941257	0.964188	1.04469	1.02786	1.01225	1.07542	0.0727988
P10599	Thioredoxin OS=Homo sapiens GN=TXN PE=1 SV=3 - [THIO_HUMAN]	51.43	5	5	90	105	11.7297	4.91943	0.941525	0.911458	0.907201	0.920061	1.11662	0.961423	1.01977	1.0326	1.12232	0.0728627
Q8NEW0	Zinc transporter 7 OS=Homo sapiens GN=SLC30A7 PE=2 SV=1 - [ZNT7_HUMAN]	5.59	2	2	3	376	41.5993	6.94678		0.945938	0.925971	0.935955		1.06759	1.01171	1.03965	1.1108	0.0730143
Q8NC42	E3 ubiquitin-protein ligase RNF149 OS=Homo sapiens GN=RNF149 PE=2 SV=2 - [RN149_HUMAN]	24.25	8	8	11	400	43.137	6.53662	0.984278	1.05724	1.10086	1.04746	0.979576	0.933023	0.83558	0.91606	0.874553	0.073026
O75369	Filamin-B OS=Homo sapiens GN=FLNB PE=1 SV=2 - [FLNB_HUMAN]	50.15	99	106	545	2602	277.99	5.73193	0.982515	0.993674	1.01434	0.996843	0.97568	0.934041	0.96682	0.958847	0.961884	0.0730636
Q7Z4Y4	GTP:AMP phosphotransferase AK3, mitochondrial OS=Homo sapiens GN=AK3 PE=2 SV=1 - [Q7Z4Y4_HUMAN]	39.21	9	9	22	227	25.6046	9.30518	1.00335	0.938189	0.985465	0.975668	1.01542	1.03174	1.02483	1.024	1.04953	0.0730983
O60869	Endothelial differentiation-related factor 1 OS=Homo sapiens GN=EDF1 PE=1 SV=1 - [EDF1_HUMAN]	52.7	8	8	23	148	16.3589	9.94971	1.1485	1.05777	0.956997	1.05442	0.840127	0.935621	0.929003	0.901584	0.855049	0.0731953
F5H7J8	Uncharacterized protein C7orf57 OS=Homo sapiens GN=C7orf57 PE=4 SV=2 - [F5H7J8_HUMAN]	6.37	1	1	2	157	17.4695	5.05908	1.25586		1.10389	1.17987	0.710576		0.873165	0.79187	0.671149	0.0733205
A0A024RAJ7	Ribosome-releasing factor 2, mitochondrial OS=Homo sapiens GN=GFM2 PE=3 SV=1 - [A0A024RAJ7_HUMAN]	3.42	2	2	4	732	81.1493	6.17627		1.03216	1.00314	1.01765		0.967113	0.96698	0.967047	0.950273	0.0733271
F8W0R1	Endoplasmic reticulum-Golgi intermediate compartment protein 2 (Fragment) OS=Homo sapiens GN=ERGIC2 PE=1 SV=1 - [F8W0R1_HUMAN]	18.6	3	3	6	172	19.4968	6.20166	1.04773	1.02795	1.03115	1.03561	1.01406	0.880919	0.924937	0.939971	0.90765	0.0733335
Q9Y3Q3	Transmembrane emp24 domain-containing protein 3 OS=Homo sapiens GN=TMED3 PE=1 SV=1 - [TMED3_HUMAN]	13.36	3	3	4	217	24.7613	5.60498	1.02153		1.0417	1.03161	0.925786		0.844066	0.884926	0.857808	0.0733737
B4DRL9	cDNA FLJ58404, highly similar to Rab proteins geranylgeranyltransferase component A 1 OS=Homo sapiens PE=2 SV=1 - [B4DRL9_HUMAN]	6.73	3	3	4	505	57.2278	4.86865	0.951522	0.883344	0.989722	0.941529	0.990882	1.04489	1.06079	1.03219	1.09629	0.0735873
P07305	Histone H1.0 OS=Homo sapiens GN=H1F0 PE=1 SV=3 - [H10_HUMAN]	30.93	6	6	32	194	20.8502	10.8433	0.950291	0.999643	0.902398	0.950777	0.995949	1.04435	1.07755	1.03928	1.09309	0.073604
Q99848	Probable rRNA-processing protein EBP2 OS=Homo sapiens GN=EBNA1BP2 PE=1 SV=2 - [EBP2_HUMAN]	48.04	15	15	44	306	34.8304	10.0962	1.17613	1.26349	0.982001	1.14054	0.733042	0.754661	1.02575	0.837819	0.734582	0.0736183
B4DUP5	cDNA FLJ60165, highly similar to Translation initiation factor eIF-2B subunit delta OS=Homo sapiens PE=2 SV=1 - [B4DUP5_HUMAN]	38.46	1	8	25	312	34.7754	10.0669	0.841804	0.745651	0.87168	0.819712	0.922121	1.04969	0.910592	0.9608	1.17212	0.0736848
P61457	Pterin-4-alpha-carbinolamine dehydratase OS=Homo sapiens GN=PCBD1 PE=1 SV=2 - [PHS_HUMAN]	29.81	3	3	14	104	11.992	6.80029	1.01243	1.0634	1.09921	1.05835	0.951776	0.961213	1.02147	0.978154	0.924228	0.0738463
Q92876	Kallikrein-6 OS=Homo sapiens GN=KLK6 PE=1 SV=1 - [KLK6_HUMAN]	21.31	4	4	7	244	26.8384	7.44482	1.10826	1.04618	1.23836	1.13093	0.743949	1.04463	0.848061	0.87888	0.777128	0.0739005
H3BSW0	Leucine-rich repeat-containing protein 57 (Fragment) OS=Homo sapiens GN=LRRC57 PE=1 SV=1 - [H3BSW0_HUMAN]	20.27	3	3	5	148	16.3138	9.17334	0.949231	0.850481	1.01206	0.937257	1.08756	1.10089	1.01433	1.06759	1.13906	0.0739101
A0A0D9SFS3	2-oxoglutarate dehydrogenase, mitochondrial OS=Homo sapiens GN=OGDH PE=1 SV=1 - [A0A0D9SFS3_HUMAN]	31.47	28	28	100	1001	113.241	7.07861	0.942963	0.965038	1.02468	0.977559	1.06349	1.02496	1.03827	1.04224	1.06616	0.0739558
Q9BSR8	Protein YIPF4 OS=Homo sapiens GN=YIPF4 PE=1 SV=1 - [YIPF4_HUMAN]	9.02	2	2	5	244	27.0653	4.65283	0.921699	1.01663	0.96921	0.969181	1.0107	1.12687	1.0845	1.07402	1.10818	0.0740979
B2RBI2	cDNA, FLJ95525, highly similar to Homo sapiens synapse associated protein 1, SAP47 homolog (Drosophila) (SYAP1), mRNA OS=Homo sapiens PE=2 SV=1 - [B2RBI2_HUMAN]	24.72	9	9	21	352	39.8808	4.52588	1.03791	1.01298	1.00027	1.01705	0.997303	0.961395	0.98295	0.980549	0.964109	0.0742658
Q96HA1	Nuclear envelope pore membrane protein POM 121 OS=Homo sapiens GN=POM121 PE=1 SV=2 - [P121A_HUMAN]	5.44	4	4	6	1249	127.642	10.5649	0.9803	1.00234		0.991321	1.10429	1.05745		1.08087	1.09033	0.0743522
B7WPG3	Heterogeneous nuclear ribonucleoprotein L-like OS=Homo sapiens GN=HNRNPLL PE=1 SV=1 - [B7WPG3_HUMAN]	25.39	9	10	29	508	56.4151	7.79639	0.98507	0.997081	0.983507	0.988553	1.07892	1.04123	1.00398	1.04138	1.05344	0.0747341
Q96A57	Transmembrane protein 230 OS=Homo sapiens GN=TMEM230 PE=1 SV=1 - [TM230_HUMAN]	26.67	3	3	4	120	13.1801	9.30518	0.964119		0.976384	0.970251	0.991823		1.0006	0.996213	1.02676	0.0750193
Q8WVC2	40S ribosomal protein S21 OS=Homo sapiens GN=RPS21 PE=1 SV=1 - [Q8WVC2_HUMAN]	49.38	4	4	20	81	8.84446	8.49951	1.1835	1.01414	0.990916	1.06285	0.738676	0.89401	0.939528	0.857405	0.806704	0.0750552
Q9NZW5	MAGUK p55 subfamily member 6 OS=Homo sapiens GN=MPP6 PE=1 SV=2 - [MPP6_HUMAN]	8.52	3	4	5	540	61.0788	6.17627	1.05887	1.06251	1.17545	1.09894	1.00193	1.00736	1.01226	1.00718	0.916502	0.0751355
A8K2I7	cDNA FLJ76072, highly similar to Homo sapiens GIPC PDZ domain containing family, member 1 (GIPC1), transcript variant 1, mRNA OS=Homo sapiens PE=2 SV=1 - [A8K2I7_HUMAN]	22.82	6	6	12	333	36.0167	6.27783	1.00784	1.0149	1.07778	1.03351	0.98789	0.981959	0.960391	0.976747	0.94508	0.0751552
Q5UIP0	Telomere-associated protein RIF1 OS=Homo sapiens GN=RIF1 PE=1 SV=2 - [RIF1_HUMAN]	10.88	22	22	47	2472	274.294	5.51611	1.0261	1.1145	1.19686	1.11249	1.00792	1.00238	0.951755	0.987351	0.887517	0.0754813
Q92845	Kinesin-associated protein 3 OS=Homo sapiens GN=KIFAP3 PE=1 SV=2 - [KIFA3_HUMAN]	2.78	2	2	4	792	91.1465	5.08447	1.09135	1.09533	1.01578	1.06749	0.880237	1.03134	0.914991	0.942188	0.882624	0.0754838
P32969	60S ribosomal protein L9 OS=Homo sapiens GN=RPL9 PE=1 SV=1 - [RL9_HUMAN]	39.06	8	8	65	192	21.8498	9.94971	1.08533	1.06897	1.0547	1.06967	0.892992	0.870575	1.04608	0.936549	0.875552	0.075707
A0A0A0MRW6	Nucleolar protein 6 OS=Homo sapiens GN=NOL6 PE=1 SV=1 - [A0A0A0MRW6_HUMAN]	9.92	9	9	19	1008	112.087	7.62061	1.14834	1.21282	1.00584	1.12234	0.715955	0.787336	1.03947	0.847588	0.7552	0.0763019
B3KR49	Mitogen-activated protein kinase 3 OS=Homo sapiens GN=MAPK3 PE=1 SV=1 - [B3KR49_HUMAN]	31.7	3	7	27	265	30.6207	5.98584	0.997899		0.999746	0.998823	1.06483		1.03493	1.04988	1.05112	0.0763392
A6NF51	3'(2'),5'-bisphosphate nucleotidase 1 OS=Homo sapiens GN=BPNT1 PE=1 SV=2 - [A6NF51_HUMAN]	33.33	8	8	19	291	31.6873	5.5415	0.890808	0.886365	0.987218	0.921464	1.16985	1.00463	1.02683	1.0671	1.15805	0.0764632
A8K5B0	cDNA FLJ75682, highly similar to Homo sapiens armadillo repeat containing, X-linked 3 (ARMCX3), transcript variant 1, mRNA OS=Homo sapiens PE=2 SV=1 - [A8K5B0_HUMAN]	26.39	9	9	20	379	42.5459	8.17725	0.920908	0.912383	0.999369	0.94422	1.06121	1.08371	0.982261	1.04239	1.10397	0.0766279
Q9Y237	Peptidyl-prolyl cis-trans isomerase NIMA-interacting 4 OS=Homo sapiens GN=PIN4 PE=1 SV=1 - [PIN4_HUMAN]	17.56	2	2	4	131	13.801	9.77393	1.00645	1.02976	1.02441	1.02021	0.883393	1.0038	0.90512	0.930771	0.912334	0.0767003
O60216	Double-strand-break repair protein rad21 homolog OS=Homo sapiens GN=RAD21 PE=1 SV=2 - [RAD21_HUMAN]	20.6	11	11	28	631	71.6447	4.65283	1.00429	1.04907	1.0326	1.02865	0.94409	0.963086	1.01045	0.97254	0.945449	0.0767655
C9JKQ2	NADH dehydrogenase [ubiquinone] 1 beta subcomplex subunit 3 (Fragment) OS=Homo sapiens GN=NDUFB3 PE=1 SV=1 - [C9JKQ2_HUMAN]	16.92	1	1	2	65	7.58072	8.54346	1.15123		1.05698	1.1041	0.909443		0.950054	0.929749	0.842085	0.0767712
A0A024R8L8	Envoplakin, isoform CRA_a OS=Homo sapiens GN=EVPL PE=4 SV=1 - [A0A024R8L8_HUMAN]	9.54	16	16	25	2033	231.491	7.02002	1.06704	1.00506	1.01797	1.03002	0.914239	0.99709	0.852995	0.921441	0.894583	0.0768478
P39023	60S ribosomal protein L3 OS=Homo sapiens GN=RPL3 PE=1 SV=2 - [RL3_HUMAN]	44.17	5	21	108	403	46.0798	10.1841	1.07762	1.15014	1.01055	1.07944	0.894824	0.928141	1.02178	0.948248	0.878464	0.0769778
A0A0S2Z523	SURF1-like protein (Fragment) OS=Homo sapiens GN=SURF1 PE=2 SV=1 - [A0A0S2Z523_HUMAN]	4.2	1	1	2	238	26.735	9.51025		1.12557	1.12995	1.12776		0.917541	1.01321	0.965378	0.856013	0.0770507
P21266	Glutathione S-transferase Mu 3 OS=Homo sapiens GN=GSTM3 PE=1 SV=3 - [GSTM3_HUMAN]	60.89	6	14	58	225	26.5421	5.5415	0.939517	0.908099	0.973012	0.940209	1.09491	1.02951	0.975381	1.03327	1.09898	0.0770569
Q9HD26	Golgi-associated PDZ and coiled-coil motif-containing protein OS=Homo sapiens GN=GOPC PE=1 SV=1 - [GOPC_HUMAN]	6.28	3	3	4	462	50.4888	5.92236	1.00467	1.01968	1.068	1.03078	0.90228	0.992311	0.820846	0.905146	0.878115	0.0770636
Q5SYE7	NHS-like protein 1 OS=Homo sapiens GN=NHSL1 PE=1 SV=2 - [NHSL1_HUMAN]	1.61	2	2	4	1610	170.563	6.96143	1.06395	0.939367	1.1091	1.03747	0.9066	0.940363	0.806876	0.884613	0.852661	0.0773406
E7ETK0	40S ribosomal protein S24 OS=Homo sapiens GN=RPS24 PE=1 SV=1 - [E7ETK0_HUMAN]	40.46	6	6	59	131	15.1873	10.8872	1.09377	1.06582	1.00468	1.05476	0.816005	0.876523	1.01479	0.902441	0.855592	0.0773664
P09669	Cytochrome c oxidase subunit 6C OS=Homo sapiens GN=COX6C PE=1 SV=2 - [COX6C_HUMAN]	21.33	3	3	8	75	8.77569	10.3892	0.82566	0.937618	0.928469	0.897249	1.18358	1.05087	0.968628	1.06769	1.18996	0.077532
A4LAA3	Alpha thalassemia/mental retardation syndrome X-linked OS=Homo sapiens GN=ATRX PE=4 SV=1 - [A4LAA3_HUMAN]	5.3	10	11	22	2492	282.412	6.55127	1.03448	1.07801	1.11512	1.07587	1.01577	1.0292	0.960746	1.00191	0.931253	0.0776125
P41208	Centrin-2 OS=Homo sapiens GN=CETN2 PE=1 SV=1 - [CETN2_HUMAN]	16.86	3	3	10	172	19.7259	4.99561	1.01778	1.02301	1.14799	1.06293	0.940454	0.961642	0.778619	0.893572	0.840671	0.0777089
Q96PU5	E3 ubiquitin-protein ligase NEDD4-like OS=Homo sapiens GN=NEDD4L PE=1 SV=2 - [NED4L_HUMAN]	6.15	5	5	6	975	111.862	5.8208	0.993158	1.07253	1.12735	1.06435	1.00025	0.92752	0.84515	0.924308	0.868428	0.0777692
A0A024R7P3	Cation-transporting ATPase OS=Homo sapiens GN=ATP13A1 PE=3 SV=1 - [A0A024R7P3_HUMAN]	17.31	17	17	44	1086	121.032	7.75244	1.01206	1.03049	1.04693	1.02983	1.01198	1.00349	0.994377	1.00328	0.974224	0.0782491
A0A024RC87	Ribonuclease/angiogenin inhibitor 1, isoform CRA_a OS=Homo sapiens GN=RNH1 PE=4 SV=1 - [A0A024RC87_HUMAN]	37.94	12	12	48	456	49.3848	4.84326	1.01179	0.989728	0.955216	0.985576	1.0278	1.05277	1.01561	1.03206	1.04716	0.0783261
B3KRV2	cDNA FLJ34950 fis, clone NT2RP7017284, highly similar to Casein kinase I isoform epsilon (EC 2.7.11.1) OS=Homo sapiens PE=2 SV=1 - [B3KRV2_HUMAN]	11.54	1	4	11	416	47.3103	9.70068	0.988443	1.19874	1.12124	1.10281	1.02082	0.771641	0.685742	0.826066	0.749058	0.0785084
P48047	ATP synthase subunit O, mitochondrial OS=Homo sapiens GN=ATP5O PE=1 SV=1 - [ATPO_HUMAN]	39.91	7	7	43	213	23.2627	9.96436	1.00138	0.991838	0.961694	0.984971	1.01502	1.00797	1.03881	1.0206	1.03617	0.0786062
D6W625	Chromatin assembly factor 1, subunit A (P150), isoform CRA_a OS=Homo sapiens GN=CHAF1A PE=4 SV=1 - [D6W625_HUMAN]	3.77	4	4	5	956	106.872	5.93506	1.04973	1.04718	1.07395	1.05695	0.739554	1.00602	0.880459	0.875345	0.828179	0.0789261
B7Z6Y2	cDNA FLJ54942, highly similar to Homo sapiens bridging integrator 1 (BIN1), transcript variant 10, mRNA OS=Homo sapiens PE=2 SV=1 - [B7Z6Y2_HUMAN]	21.82	6	6	14	385	43.1385	5.32568	0.972313	0.982889	0.908478	0.95456	1.03487	0.999986	1.11089	1.04858	1.0985	0.0792337
A0A024R0J9	Heterogeneous nuclear ribonucleoprotein U-like 1, isoform CRA_a OS=Homo sapiens GN=HNRPUL1 PE=4 SV=1 - [A0A024R0J9_HUMAN]	35.98	21	22	69	756	84.741	8.77783	1.00605	0.967364	0.986483	0.986632	1.01907	1.09628	1.0307	1.04868	1.06289	0.0792506
P29966	Myristoylated alanine-rich C-kinase substrate OS=Homo sapiens GN=MARCKS PE=1 SV=4 - [MARCS_HUMAN]	21.08	5	5	21	332	31.5359	4.44971	0.948802	0.981092	0.968262	0.966052	1.11031	1.04739	0.991083	1.04959	1.08648	0.0793181
A0A0U1RRM4	Polypyrimidine tract-binding protein 1 OS=Homo sapiens GN=PTBP1 PE=1 SV=1 - [A0A0U1RRM4_HUMAN]	28.23	2	12	85	588	62.4253	9.1001	1.10629		1.02992	1.06811	0.946644		0.922547	0.934595	0.875002	0.0793754
O43709	Probable 18S rRNA (guanine-N(7))-methyltransferase OS=Homo sapiens GN=WBSCR22 PE=1 SV=2 - [WBS22_HUMAN]	14.23	2	2	2	281	31.8601	8.73389	1.00184	1.07438		1.03811	0.920635	0.913244		0.91694	0.883274	0.0798363
B7ZLW0	LPP protein OS=Homo sapiens GN=LPP PE=2 SV=1 - [B7ZLW0_HUMAN]	21.9	10	10	26	612	65.7319	7.37158	0.949618	0.963725	1.02105	0.97813	0.930958	0.876546	0.929304	0.912269	0.932667	0.0799114
P36404	ADP-ribosylation factor-like protein 2 OS=Homo sapiens GN=ARL2 PE=1 SV=4 - [ARL2_HUMAN]	35.33	6	6	16	184	20.8649	6.34131	0.960721	0.999081	0.989402	0.983068	1.02328	1.0079	1.06824	1.03314	1.05093	0.0799217
Q9H6S3	Epidermal growth factor receptor kinase substrate 8-like protein 2 OS=Homo sapiens GN=EPS8L2 PE=1 SV=2 - [ES8L2_HUMAN]	6.85	3	3	8	715	80.5701	6.84424	1.03002	1.0252	0.989574	1.01493	0.972393	0.991923	0.937245	0.967187	0.952956	0.0799363
J9JIC5	Protein Njmu-R1 OS=Homo sapiens GN=C17orf75 PE=1 SV=1 - [J9JIC5_HUMAN]	18.94	6	6	11	396	44.5809	5.03369	0.838802	0.959065	0.995169	0.931012	1.04836	1.06055	1.02359	1.04416	1.12154	0.0799974
H7BXZ6	Mitochondrial Rho GTPase OS=Homo sapiens GN=RHOT1 PE=1 SV=2 - [H7BXZ6_HUMAN]	5.86	2	3	8	597	68.4055	5.99854	0.969386	1.07571	1.25238	1.09916	0.967963	0.839113	0.839561	0.882213	0.802626	0.0800203
Q8IVS2	Malonyl-CoA-acyl carrier protein transacylase, mitochondrial OS=Homo sapiens GN=MCAT PE=1 SV=2 - [FABD_HUMAN]	17.95	6	6	8	390	42.9341	8.71924	1.00583	1.0185	0.891606	0.971978	1.07915	1.07236	1.05188	1.0678	1.09858	0.0805142
Q9H9A5	CCR4-NOT transcription complex subunit 10 OS=Homo sapiens GN=CNOT10 PE=1 SV=1 - [CNO10_HUMAN]	6.99	5	5	8	744	82.2575	7.78174	0.989363	1.07007	1.06651	1.04198	0.977333	0.966089	0.99164	0.978354	0.938935	0.0805497
Q53F19	Nuclear cap-binding protein subunit 3 OS=Homo sapiens GN=NCBP3 PE=1 SV=2 - [NCBP3_HUMAN]	8.71	5	5	5	620	70.5493	5.73193	0.834305		0.90696	0.870633	1.06122		0.998131	1.02967	1.18267	0.0806011
B4DTK6	cDNA FLJ50670, highly similar to RNA polymerase I-specific transcription initiation factor RRN3 OS=Homo sapiens PE=2 SV=1 - [B4DTK6_HUMAN]	13.85	8	8	11	621	70.3639	5.94775	0.868581	0.843327	1.03716	0.916358	1.19011	1.21435	0.992583	1.13235	1.2357	0.0807409
J3KNF4	Copper chaperone for superoxide dismutase OS=Homo sapiens GN=CCS PE=1 SV=1 - [J3KNF4_HUMAN]	17.25	4	4	5	255	27.0695	5.89697	1.09208	1.00236	1.0158	1.03674	0.912252	0.991718	0.954295	0.952755	0.918987	0.0808745
Q15262	Receptor-type tyrosine-protein phosphatase kappa OS=Homo sapiens GN=PTPRK PE=1 SV=2 - [PTPRK_HUMAN]	1.53	2	2	3	1439	161.998	5.89697	0.9798	1.06439		1.0221	0.888813	0.868248		0.87853	0.859537	0.0809263
A8K103	cDNA FLJ75454, highly similar to Homo sapiens arrestin, beta 1 (ARRB1), transcript variant 1, mRNA OS=Homo sapiens PE=2 SV=1 - [A8K103_HUMAN]	15.07	5	5	6	418	47.0353	6.48096	0.999328	0.945105	0.992201	0.978878	1.05511	1.06009	1.00013	1.03845	1.06085	0.0810053
P07195	L-lactate dehydrogenase B chain OS=Homo sapiens GN=LDHB PE=1 SV=2 - [LDHB_HUMAN]	48.2	14	15	262	334	36.6151	6.04932	0.972204	1.00169	0.982416	0.985437	1.01757	0.997136	1.02238	1.01236	1.02732	0.0811023
B7Z6D5	Probable ATP-dependent RNA helicase DDX27 OS=Homo sapiens GN=DDX27 PE=1 SV=1 - [B7Z6D5_HUMAN]	18.17	14	14	26	765	86.5506	9.24658	1.18019	1.1652	0.983643	1.10968	0.703459	0.774737	1.03095	0.836381	0.753716	0.0811392
A8K7A4	cDNA FLJ76904, highly similar to Homo sapiens methionine adenosyltransferase II, beta (MAT2B), transcript variant 2, mRNA OS=Homo sapiens PE=2 SV=1 - [A8K7A4_HUMAN]	26.01	7	7	28	323	36.4064	6.80029	0.995574	0.960578	0.981021	0.979058	0.997794	1.0945	1.05206	1.04812	1.07054	0.0811569
P58546	Myotrophin OS=Homo sapiens GN=MTPN PE=1 SV=2 - [MTPN_HUMAN]	27.97	3	3	17	118	12.8866	5.51611	0.922922	0.949998	0.958887	0.943936	1.11194	0.97784	1.02537	1.03839	1.10006	0.0811733
O60671	Cell cycle checkpoint protein RAD1 OS=Homo sapiens GN=RAD1 PE=1 SV=1 - [RAD1_HUMAN]	6.03	1	1	2	282	31.8066	4.83057	1.04086		1.0732	1.05703	0.885581		0.74114	0.813361	0.769477	0.0811762
O75691	Small subunit processome component 20 homolog OS=Homo sapiens GN=UTP20 PE=1 SV=3 - [UTP20_HUMAN]	3.38	9	9	14	2785	318.182	7.38623	1.09552	1.26095	1.04453	1.13366	0.810094	0.714782	1.04883	0.857903	0.756752	0.0812028
A8KAE0	cDNA FLJ78476, highly similar to Homo sapiens WD repeat and HMG-box DNA binding protein 1 (WDHD1), transcript variant 1, mRNA OS=Homo sapiens PE=2 SV=1 - [A8KAE0_HUMAN]	12.05	10	10	19	1129	125.936	5.61768	1.02791	1.01662	1.04487	1.0298	0.986075	1.00474	0.927986	0.972934	0.944782	0.0812711
Q6RFH5	WD repeat-containing protein 74 OS=Homo sapiens GN=WDR74 PE=1 SV=1 - [WDR74_HUMAN]	10.13	3	3	7	385	42.4147	8.32373	1.17133	1.24925	0.968739	1.12977	0.751627	0.849599	1.0086	0.869942	0.770015	0.0815668
K7ER15	Haloacid dehalogenase-like hydrolase domain-containing protein 2 (Fragment) OS=Homo sapiens GN=HDHD2 PE=1 SV=1 - [K7ER15_HUMAN]	10.29	2	2	5	204	22.476	6.93213	0.905385	0.975819	0.994364	0.958523	1.25079	1.0251	1.09822	1.1247	1.17337	0.0816104
Q5JXJ0	Mitochondrial ribosome-associated GTPase 2 (Fragment) OS=Homo sapiens GN=MTG2 PE=1 SV=1 - [Q5JXJ0_HUMAN]	6.01	1	1	2	233	24.6698	9.99365	1.01975		0.951745	0.985748	0.845299		0.754861	0.80008	0.811647	0.0816449
B4DQ98	cDNA FLJ55135, highly similar to Di-N-acetylchitobiase (EC 3.2.1.-) OS=Homo sapiens PE=2 SV=1 - [B4DQ98_HUMAN]	12.3	5	5	9	382	43.4054	6.44287	0.944203	0.882056	0.929341	0.918533	1.11015	1.00517	0.965903	1.02707	1.11817	0.0818945
Q00534	Cyclin-dependent kinase 6 OS=Homo sapiens GN=CDK6 PE=1 SV=1 - [CDK6_HUMAN]	23.62	6	7	17	326	36.915	6.45557	0.97488	0.957148	1.04559	0.99254	0.94194	0.926844	0.912997	0.92726	0.93423	0.0821726
P08238	Heat shock protein HSP 90-beta OS=Homo sapiens GN=HSP90AB1 PE=1 SV=4 - [HS90B_HUMAN]	56.91	27	47	678	724	83.2121	5.03369	1.0418	0.985387	1.02518	1.01746	0.917931	0.979203	0.975515	0.95755	0.94112	0.0822056
G3V4W0	Heterogeneous nuclear ribonucleoproteins C1/C2 (Fragment) OS=Homo sapiens GN=HNRNPC PE=1 SV=1 - [G3V4W0_HUMAN]	56.87	19	19	217	262	28.8985	8.39697	0.975942	1.00075	0.937233	0.971307	1.0113	1.01226	1.06067	1.02808	1.05844	0.0825973
Q15102	Platelet-activating factor acetylhydrolase IB subunit gamma OS=Homo sapiens GN=PAFAH1B3 PE=1 SV=1 - [PA1B3_HUMAN]	23.38	6	6	24	231	25.7182	6.84424	0.968429	1.01853	0.940931	0.975962	1.05752	1.04793	1.00941	1.03829	1.06386	0.0826144
Q92896	Golgi apparatus protein 1 OS=Homo sapiens GN=GLG1 PE=1 SV=2 - [GSLG1_HUMAN]	26.38	29	29	67	1179	134.464	6.90283	0.987079	0.997378	1.14153	1.042	0.938043	0.930288	0.810339	0.89289	0.856903	0.0827293
Q96AQ8	Mitochondrial calcium uniporter regulator 1 OS=Homo sapiens GN=MCUR1 PE=1 SV=1 - [MCUR1_HUMAN]	8.36	2	2	7	359	39.6691	9.62744	1.07327	0.999641	1.18065	1.08452	1.01678	0.871447	0.877562	0.921929	0.850081	0.0832902
P49207	60S ribosomal protein L34 OS=Homo sapiens GN=RPL34 PE=1 SV=3 - [RL34_HUMAN]	42.74	7	7	60	117	13.2845	11.4731	1.0586	1.09403	0.985727	1.04612	0.868371	0.917695	1.0033	0.929788	0.888797	0.0834262
B2R6Y1	Histone H3 OS=Homo sapiens PE=2 SV=1 - [B2R6Y1_HUMAN]	36.76	3	6	94	136	15.3045	11.2681	1.10971	0.991001	1.1587	1.08647	0.937887	0.998073	0.809214	0.915058	0.84223	0.0834458
A8K800	cDNA FLJ76924, highly similar to Homo sapiens brix domain containing 1 (BXDC1), mRNA OS=Homo sapiens PE=2 SV=1 - [A8K800_HUMAN]	23.53	7	7	15	306	35.5502	9.99365	1.12603	1.182	1.05093	1.11966	0.897726	0.858921	1.07517	0.943939	0.843061	0.0835836
A8MZF9	Developmentally-regulated GTP-binding protein 2 OS=Homo sapiens GN=DRG2 PE=1 SV=1 - [A8MZF9_HUMAN]	18.66	4	5	16	343	38.105	8.90967	0.971846	1.01332	0.965086	0.983417	1.08917	1.00039	1.09106	1.06021	1.07808	0.0836392
Q53FD7	Nucleoporin 54kDa variant (Fragment) OS=Homo sapiens PE=2 SV=1 - [Q53FD7_HUMAN]	22.29	10	10	23	507	55.3434	7.28369	1.0071	1.02081	1.02277	1.01689	0.992091	0.982145	1.01035	0.994861	0.978333	0.0837876
H0Y3P2	Eukaryotic translation initiation factor 4 gamma 2 OS=Homo sapiens GN=EIF4G2 PE=1 SV=1 - [H0Y3P2_HUMAN]	35.44	28	28	80	869	98.0557	6.99072	0.958383	1.02052	0.949558	0.976153	1.02907	1.01721	1.04543	1.03057	1.05575	0.0840079
A0A024QZU5	Peroxisomal D3,D2-enoyl-CoA isomerase, isoform CRA_a OS=Homo sapiens GN=PECI PE=4 SV=1 - [A0A024QZU5_HUMAN]	20.88	6	6	18	364	40.1857	8.76318	0.950133	1.00056	1.02327	0.991322	1.08756	1.06167	1.02221	1.05714	1.0664	0.0840968
Q9BQA1	Methylosome protein 50 OS=Homo sapiens GN=WDR77 PE=1 SV=1 - [MEP50_HUMAN]	26.61	6	6	22	342	36.7011	5.17334	0.98213	1.02406	0.913439	0.97321	1.03369	1.06668	1.04969	1.05002	1.07893	0.0843531
P62280	40S ribosomal protein S11 OS=Homo sapiens GN=RPS11 PE=1 SV=3 - [RS11_HUMAN]	56.33	11	11	55	158	18.419	10.3013	1.02229	1.01322	0.995943	1.01048	0.866291	0.876966	0.996768	0.913342	0.903866	0.0844292
Q5CZC0	Fibrous sheath-interacting protein 2 OS=Homo sapiens GN=FSIP2 PE=2 SV=4 - [FSIP2_HUMAN]	0.51	2	2	3	6907	780.119	6.7124	1.29264	1.40678	1.0788	1.25941	0.798141	1.13134	0.908148	0.945877	0.751049	0.0844376
P62851	40S ribosomal protein S25 OS=Homo sapiens GN=RPS25 PE=1 SV=1 - [RS25_HUMAN]	36	6	6	68	125	13.7337	10.1108	1.11034	1.05343	1.04751	1.07043	0.808555	0.910609	1.03094	0.9167	0.856385	0.0844442
Q59EF6	Calpain 2, large [catalytic] subunit variant (Fragment) OS=Homo sapiens PE=2 SV=1 - [Q59EF6_HUMAN]	15.64	10	10	31	729	83.0563	5.05908	0.979568	0.988845	0.984952	0.984455	1.03373	0.98978	1.02126	1.01492	1.03095	0.084586
P49756	RNA-binding protein 25 OS=Homo sapiens GN=RBM25 PE=1 SV=3 - [RBM25_HUMAN]	23.01	21	21	54	843	100.124	6.31592	0.953853	1.0103	0.966947	0.977033	1.07991	0.996537	1.06599	1.04748	1.0721	0.0849222
O75533	Splicing factor 3B subunit 1 OS=Homo sapiens GN=SF3B1 PE=1 SV=3 - [SF3B1_HUMAN]	33.36	35	35	114	1304	145.738	7.09326	0.994548	0.988199	0.937465	0.973404	1.00485	1.0177	1.03276	1.01844	1.04626	0.0851172
F8W6G5	Aprataxin (Fragment) OS=Homo sapiens GN=APTX PE=1 SV=1 - [F8W6G5_HUMAN]	18.69	3	3	3	198	22.749	9.78857	0.999092		0.947148	0.97312	1.05228		1.06632	1.0593	1.08856	0.085191
B2RAR2	cDNA, FLJ95064, highly similar to Homo sapiens nin one binding protein (NOB1P), mRNA OS=Homo sapiens PE=2 SV=1 - [B2RAR2_HUMAN]	7.28	3	3	11	412	46.6158	7.18115	1.14815	1.10693	1.02855	1.09455	0.727421	0.906825	1.02044	0.884895	0.808459	0.0854214
Q86WI8	Integrase interactor 1 protein isoform D (Fragment) OS=Homo sapiens GN=SMARCB1 PE=2 SV=1 - [Q86WI8_HUMAN]	16.25	1	1	3	80	9.08867	6.53662	0.945709	0.968054	0.946867	0.953543	1.01105	0.96717	1.04647	1.00823	1.05735	0.0854284
Q6JQN1	Acyl-CoA dehydrogenase family member 10 OS=Homo sapiens GN=ACAD10 PE=1 SV=1 - [ACD10_HUMAN]	2.17	2	2	2	1059	118.758	8.06006	0.907148	0.968633		0.937891	1.03256	1.06424		1.0484	1.11783	0.0855539
P26358	DNA (cytosine-5)-methyltransferase 1 OS=Homo sapiens GN=DNMT1 PE=1 SV=2 - [DNMT1_HUMAN]	16.89	25	25	56	1616	183.05	7.75244	1.03392	1.0445	1.17198	1.08347	0.947889	1.01439	0.862493	0.94159	0.869054	0.0855713
Q02878	60S ribosomal protein L6 OS=Homo sapiens GN=RPL6 PE=1 SV=3 - [RL6_HUMAN]	59.38	19	19	98	288	32.7076	10.5796	1.05839	1.13204	1.00382	1.06475	0.82814	0.850137	1.02415	0.900808	0.846028	0.0858826
Q9Y2V2	Calcium-regulated heat-stable protein 1 OS=Homo sapiens GN=CARHSP1 PE=1 SV=2 - [CHSP1_HUMAN]	23.81	3	3	26	147	15.882	8.20654	0.959718	1.02097	1.00026	0.993648	1.12846	1.01487	1.09964	1.08099	1.0879	0.0861135
K7ENP1	tRNA (guanine(10)-N2)-methyltransferase homolog OS=Homo sapiens GN=TRMT11 PE=1 SV=1 - [K7ENP1_HUMAN]	12.17	3	3	9	230	26.4366	7.21045	0.91435	0.940309	0.946276	0.933645	1.10261	0.950304	1.06906	1.04066	1.11462	0.086134
P12081	Histidine--tRNA ligase, cytoplasmic OS=Homo sapiens GN=HARS PE=1 SV=2 - [SYHC_HUMAN]	28.29	10	15	70	509	57.3742	5.88428	1.00299	0.956987	0.88887	0.949614	1.01335	1.0219	1.07997	1.03841	1.09351	0.0861901
B7Z301	Mevalonate kinase OS=Homo sapiens PE=2 SV=1 - [B7Z301_HUMAN]	13.08	3	3	4	344	37.1336	7.07861	0.998291	1.09664	1.10208	1.06567	1.02657	0.82772	0.875374	0.909887	0.853816	0.0861961
D6RGI3	Septin 11, isoform CRA_b OS=Homo sapiens GN=SEPT11 PE=1 SV=1 - [D6RGI3_HUMAN]	27.76	5	9	47	425	48.9751	6.96143	0.975745	0.925865	0.957557	0.953056	1.07765	1.08807	0.96945	1.04505	1.09653	0.0862457
A8K9J7	Histone H2B OS=Homo sapiens PE=2 SV=1 - [A8K9J7_HUMAN]	57.14	2	9	414	126	13.9876	10.3159	0.99725	1.00797	1.05626	1.02049	0.916885	1.00021	0.929163	0.948752	0.929701	0.086273
B7Z377	cDNA FLJ57937, highly similar to DNA-directed RNA polymerase II 33 kDa polypeptide (EC 2.7.7.6) OS=Homo sapiens PE=2 SV=1 - [B7Z377_HUMAN]	25.16	3	3	6	155	17.4688	4.62744	1.06075		1.11741	1.08908	0.956286		0.998341	0.977314	0.897374	0.0868675
B2RAF9	Suppressor of tumorigenicity 14 protein homolog OS=Homo sapiens PE=2 SV=1 - [B2RAF9_HUMAN]	10.64	7	7	21	855	94.6898	6.52197	0.958227	0.988732	1.10112	1.01603	0.926585	0.908574	0.916764	0.917308	0.902839	0.0870695
Q86YP4	Transcriptional repressor p66-alpha OS=Homo sapiens GN=GATAD2A PE=1 SV=1 - [P66A_HUMAN]	28.59	12	13	29	633	68.0205	9.93506	1.02603	0.983136	1.09974	1.0363	0.932457	0.987866	0.897465	0.939263	0.906361	0.0871734
Q9NVQ4	Fas apoptotic inhibitory molecule 1 OS=Homo sapiens GN=FAIM PE=1 SV=1 - [FAIM1_HUMAN]	6.7	1	1	2	179	20.2022	5.8335	1.07059	1.0565		1.06354	0.897174	0.976201		0.936687	0.880723	0.0872087
P49773	Histidine triad nucleotide-binding protein 1 OS=Homo sapiens GN=HINT1 PE=1 SV=2 - [HINT1_HUMAN]	47.62	4	4	19	126	13.7931	6.94678	0.98565	0.961583	0.914848	0.954027	1.00386	0.991014	1.01553	1.00347	1.05182	0.0874919
O15397	Importin-8 OS=Homo sapiens GN=IPO8 PE=1 SV=2 - [IPO8_HUMAN]	3.95	3	4	9	1037	119.861	5.16064	1.04884	1.02214	1.06085	1.04394	1.00555	1.02415	1.01666	1.01545	0.972711	0.0874961
I3L2Z5	Myc-associated zinc finger protein (Fragment) OS=Homo sapiens GN=MAZ PE=1 SV=1 - [I3L2Z5_HUMAN]	12.38	2	2	3	202	22.1728	9.42236	0.960567	0.985264		0.972915	1.06609	1.02653		1.04631	1.07544	0.0878327
O95571	Persulfide dioxygenase ETHE1, mitochondrial OS=Homo sapiens GN=ETHE1 PE=1 SV=2 - [ETHE1_HUMAN]	36.61	7	7	20	254	27.8551	6.82959	1.02718	1.02985	0.99705	1.01803	1.03746	1.05279	1.04127	1.04384	1.02535	0.0878584
H0YKV4	Family with sequence similarity 96, member A, isoform CRA_a OS=Homo sapiens GN=FAM96A PE=1 SV=1 - [H0YKV4_HUMAN]	17.69	2	2	3	130	14.8988	5.16064	1.03436		1.01256	1.02346	0.989363		0.98906	0.989212	0.966534	0.0880893
C9JQ41	Coiled-coil domain-containing protein 58 OS=Homo sapiens GN=CCDC58 PE=1 SV=1 - [C9JQ41_HUMAN]	61.54	7	7	20	130	15.2869	8.88037	0.982201	0.999957	0.882036	0.954731	1.02432	1.04646	1.04534	1.03871	1.08796	0.0881386
B5BU83	Stathmin OS=Homo sapiens GN=STMN1 PE=2 SV=1 - [B5BU83_HUMAN]	45.64	8	8	46	149	17.32	5.97314	0.985055	0.969303	0.929328	0.961229	0.983214	1.09964	1.05498	1.04595	1.08813	0.0882229
Q4ZG32	Putative uncharacterized protein EPB41L5 (Fragment) OS=Homo sapiens GN=EPB41L5 PE=4 SV=1 - [Q4ZG32_HUMAN]	4.13	2	2	3	533	60.6079	7.95752	1.00214		1.04682	1.02448	0.924635		0.954966	0.9398	0.917343	0.0883921
Q14558	Phosphoribosyl pyrophosphate synthase-associated protein 1 OS=Homo sapiens GN=PRPSAP1 PE=1 SV=2 - [KPRA_HUMAN]	28.09	5	8	42	356	39.3686	7.1958	0.993955	0.952536	0.975403	0.973965	1.02953	0.988196	1.04874	1.02215	1.04948	0.0885539
G3V1C3	Apoptosis inhibitor 5 OS=Homo sapiens GN=API5 PE=1 SV=1 - [G3V1C3_HUMAN]	28.63	4	15	64	510	57.5251	6.0874	1.0153	0.937077	0.989193	0.980525	1.03745	1.04996	1.01964	1.03568	1.05626	0.088572
Q8TDQ7	Glucosamine-6-phosphate isomerase 2 OS=Homo sapiens GN=GNPDA2 PE=1 SV=1 - [GNPI2_HUMAN]	32.97	2	7	19	276	31.0646	6.94678		0.954052	1.00004	0.977045		1.04639	1.05335	1.04987	1.07454	0.0886103
A8K607	cDNA FLJ76855, highly similar to Homo sapiens exportin 7 (XPO7), mRNA OS=Homo sapiens PE=2 SV=1 - [A8K607_HUMAN]	19.5	19	19	47	1087	123.847	6.34131	0.983786	0.963706	0.915945	0.954479	0.984657	1.01936	1.01214	1.00538	1.05333	0.0886505
Q9BY43	Charged multivesicular body protein 4a OS=Homo sapiens GN=CHMP4A PE=1 SV=3 - [CHM4A_HUMAN]	36.94	2	7	22	222	25.0828	4.70361	1.01819	1.0835	1.01314	1.03828	0.915412	0.852212	1.00774	0.925121	0.891015	0.0886583
Q9NX24	H/ACA ribonucleoprotein complex subunit 2 OS=Homo sapiens GN=NHP2 PE=1 SV=1 - [NHP2_HUMAN]	36.6	4	4	12	153	17.1899	8.22119	1.08682	1.07488	1.0328	1.06483	1.01487	1.0412	0.989322	1.01513	0.953327	0.0887332
Q9BW61	DET1- and DDB1-associated protein 1 OS=Homo sapiens GN=DDA1 PE=1 SV=1 - [DDA1_HUMAN]	27.45	2	2	2	102	11.828	8.67529	1.05366		0.996068	1.02486	0.913801		0.837963	0.875882	0.854634	0.0887507
B3KW34	Protein YIPF OS=Homo sapiens PE=2 SV=1 - [B3KW34_HUMAN]	8.17	2	2	5	257	28.0127	4.36084	0.944765	1.00174	0.997413	0.981304	1.01771	1.04121	1.01843	1.02578	1.04533	0.0887879
P55809	Succinyl-CoA:3-ketoacid coenzyme A transferase 1, mitochondrial OS=Homo sapiens GN=OXCT1 PE=1 SV=1 - [SCOT1_HUMAN]	15.58	6	6	12	520	56.1219	7.45947	1.01599	0.908039	0.935358	0.953129	1.01575	1.07355	1.02059	1.03663	1.08761	0.088869
Q16186	Proteasomal ubiquitin receptor ADRM1 OS=Homo sapiens GN=ADRM1 PE=1 SV=2 - [ADRM1_HUMAN]	13.02	4	4	30	407	42.1268	5.07178	0.970404	0.997337	0.863792	0.943844	1.0776	0.999414	1.08086	1.05262	1.11525	0.0892262
Q13443	Disintegrin and metalloproteinase domain-containing protein 9 OS=Homo sapiens GN=ADAM9 PE=1 SV=1 - [ADAM9_HUMAN]	14.29	10	10	20	819	90.4971	7.51807	0.971899	1.14298	1.0386	1.05116	0.900097	0.923308	0.969546	0.930984	0.885671	0.0892623
P17152	Transmembrane protein 11, mitochondrial OS=Homo sapiens GN=TMEM11 PE=1 SV=1 - [TMM11_HUMAN]	22.92	4	4	10	192	21.527	7.35693	0.8941	0.990573	0.993253	0.959309	1.07729	1.08824	0.999531	1.05502	1.09977	0.089688
B3KSG9	Transmembrane 9 superfamily member OS=Homo sapiens PE=2 SV=1 - [B3KSG9_HUMAN]	21.99	9	9	46	573	65.3871	7.28369	1.02052	1.03438	1.11316	1.05602	1.01088	0.98092	0.957316	0.983038	0.930888	0.0897466
Q5W0V3	Protein FAM160B1 OS=Homo sapiens GN=FAM160B1 PE=1 SV=1 - [F16B1_HUMAN]	1.7	1	1	3	765	86.5031	5.2876	0.989287	0.904155	0.788313	0.893918	0.984411	1.05851	1.06429	1.03574	1.15865	0.0898601
P40222	Alpha-taxilin OS=Homo sapiens GN=TXLNA PE=1 SV=3 - [TXLNA_HUMAN]	24.36	14	15	28	546	61.8532	6.52197	1.05171	1.00787	1.05059	1.03672	0.905828	1.01911	0.870171	0.931702	0.8987	0.0899209
Q9H814	Phosphorylated adapter RNA export protein OS=Homo sapiens GN=PHAX PE=1 SV=1 - [PHAX_HUMAN]	9.39	3	3	9	394	44.3751	5.40186	0.987122	1.00764	1.0129	1.00255	1.13226	1.02974	1.05699	1.073	1.07026	0.0900385
C9JFR7	Cytochrome c (Fragment) OS=Homo sapiens GN=CYCS PE=1 SV=1 - [C9JFR7_HUMAN]	63.37	6	6	34	101	11.326	9.65674	0.984747	0.929128	0.897483	0.937119	0.994848	1.00638	1.11235	1.03786	1.1075	0.0900577
M0QYT5	Vesicle transport protein USE1 (Fragment) OS=Homo sapiens GN=USE1 PE=1 SV=1 - [M0QYT5_HUMAN]	7.45	1	1	3	161	17.7884	9.40771	0.836754	0.921177	0.957152	0.905028	1.1266	1.03961	0.955131	1.04045	1.14963	0.0906899
Q9H2G2	STE20-like serine/threonine-protein kinase OS=Homo sapiens GN=SLK PE=1 SV=1 - [SLK_HUMAN]	31.74	35	38	102	1235	142.607	5.14795	0.992195	0.95589	0.925726	0.957937	1.00831	1.00532	0.992203	1.00195	1.04594	0.0908202
Q9Y5P6	Mannose-1-phosphate guanyltransferase beta OS=Homo sapiens GN=GMPPB PE=1 SV=2 - [GMPPB_HUMAN]	19.72	5	5	12	360	39.8086	6.60986	0.92575	1.00816	0.973342	0.969086	1.0559	1.01639	1.01629	1.02953	1.06237	0.0910855
D6R9C8	Zinc finger protein 330 (Fragment) OS=Homo sapiens GN=ZNF330 PE=1 SV=8 - [D6R9C8_HUMAN]	6.47	1	1	2	139	15.6154	8.68994	0.925111	0.946685		0.935898	0.986809	1.02785		1.00733	1.07632	0.09116
P63244	Receptor of activated protein C kinase 1 OS=Homo sapiens GN=RACK1 PE=1 SV=3 - [RACK1_HUMAN]	61.51	18	18	134	317	35.0546	7.69385	1.09296	1.02938	1.00772	1.04336	0.845372	0.90983	1.01152	0.92224	0.883917	0.091239
P28074	Proteasome subunit beta type-5 OS=Homo sapiens GN=PSMB5 PE=1 SV=3 - [PSB5_HUMAN]	45.63	11	11	49	263	28.4622	6.91748	1.00877	0.931812	0.920492	0.953692	0.989722	1.04285	1.05868	1.03042	1.08045	0.0915084
O95696	Bromodomain-containing protein 1 OS=Homo sapiens GN=BRD1 PE=1 SV=1 - [BRD1_HUMAN]	2.55	2	3	4	1058	119.444	8.60205	1.06365	1.27176	1.13206	1.15582	0.920519	1.0051	1.05737	0.99433	0.860277	0.0916306
A0A087WWP4	Putative RNA-binding protein 15 OS=Homo sapiens GN=RBM15 PE=1 SV=1 - [A0A087WWP4_HUMAN]	9.65	6	7	8	933	102.073	9.93506	0.961417	0.943046	0.88276	0.929074	1.04109	1.01831	0.956973	1.00546	1.08221	0.0916982
A8K923	cDNA FLJ78690, highly similar to Homo sapiens protein phosphatase 4, regulatory subunit 1 (PPP4R1), mRNA OS=Homo sapiens PE=2 SV=1 - [A8K923_HUMAN]	4.39	4	4	8	933	105.155	4.80518	0.93633	0.950261	0.992474	0.959688	1.13062	1.03657	0.99714	1.05478	1.09908	0.0917028
Q9Y5S9	RNA-binding protein 8A OS=Homo sapiens GN=RBM8A PE=1 SV=1 - [RBM8A_HUMAN]	31.61	6	6	20	174	19.8767	5.71924	1.02057	0.953164	0.914918	0.962885	1.00396	1.11231	1.06392	1.06006	1.10093	0.0917632
Q99808	Equilibrative nucleoside transporter 1 OS=Homo sapiens GN=SLC29A1 PE=1 SV=3 - [S29A1_HUMAN]	11.84	4	4	12	456	50.1864	8.29443	1.03309	1.11383	0.969974	1.03896	0.817591	0.987743	0.882662	0.895999	0.862396	0.0917753
P46783	40S ribosomal protein S10 OS=Homo sapiens GN=RPS10 PE=1 SV=1 - [RS10_HUMAN]	53.94	11	11	117	165	18.8859	10.1548	1.05928	1.08683	1.00415	1.05009	0.898383	0.859802	1.02495	0.927713	0.883464	0.0920889
P31946	14-3-3 protein beta/alpha OS=Homo sapiens GN=YWHAB PE=1 SV=3 - [1433B_HUMAN]	54.07	5	13	251	246	28.0648	4.83057	0.982592	0.953857	0.882431	0.939627	0.980842	1.03469	1.03168	1.01574	1.081	0.0921767
D3DR40	Chromosome 10 open reading frame 4, isoform CRA_b OS=Homo sapiens GN=C10orf4 PE=1 SV=1 - [D3DR40_HUMAN]	5.4	2	2	4	315	37.5607	8.104	0.933724	0.876116	0.928687	0.912842	0.988718	1.10258	0.959929	1.01708	1.11419	0.0922144
C9JPX5	MLN64 N-terminal domain homolog (Fragment) OS=Homo sapiens GN=STARD3NL PE=1 SV=1 - [C9JPX5_HUMAN]	16.5	3	3	5	206	23.4903	5.36377	1.0885	1.04503	1.0097	1.04774	0.923616	1.02505	0.93252	0.960395	0.916632	0.0922622
A6NIR2	Chromosome 1 open reading frame 41, isoform CRA_b OS=Homo sapiens GN=HSPB11 PE=1 SV=1 - [A6NIR2_HUMAN]	20.54	2	2	4	112	13.0195	4.76709	0.985032	0.957533	1.00392	0.982163	1.02869	1.04646	0.999005	1.02472	1.04333	0.0923088
Q96C57	Uncharacterized protein C12orf43 OS=Homo sapiens GN=C12orf43 PE=1 SV=2 - [CL043_HUMAN]	31.68	5	5	14	262	28.1535	9.42236	1.02269	0.928352	0.881043	0.944027	1.04346	1.07821	1.01256	1.04474	1.10669	0.0924918
Q9NRA8	Eukaryotic translation initiation factor 4E transporter OS=Homo sapiens GN=EIF4ENIF1 PE=1 SV=2 - [4ET_HUMAN]	4.26	3	3	6	985	108.134	8.32373	1.0114	1.05036	1.12032	1.06069	1.02197	0.95067	0.921898	0.964847	0.909637	0.0927753
Q96IR1	RPS4X protein (Fragment) OS=Homo sapiens GN=RPS4X PE=2 SV=2 - [Q96IR1_HUMAN]	53.91	14	14	139	243	27.2427	9.93506	1.10446	1.1405	1.03665	1.09387	0.851757	0.848053	1.06621	0.922008	0.842887	0.0931058
D6RBS5	ELMO domain-containing protein 2 (Fragment) OS=Homo sapiens GN=ELMOD2 PE=1 SV=8 - [D6RBS5_HUMAN]	22.75	4	4	7	167	20.1342	9.08545	0.898045	0.98396	0.945716	0.942573	1.13251	1.05871	0.97608	1.05577	1.12009	0.0931542
O43747	AP-1 complex subunit gamma-1 OS=Homo sapiens GN=AP1G1 PE=1 SV=5 - [AP1G1_HUMAN]	16.06	13	14	42	822	91.2931	6.80029	0.998895	0.971526	1.00055	0.990325	0.99928	1.08953	1.08224	1.05701	1.06734	0.0935729
Q9Y5K6	CD2-associated protein OS=Homo sapiens GN=CD2AP PE=1 SV=1 - [CD2AP_HUMAN]	41.94	25	25	73	639	71.4073	6.40479	0.957704	0.973156	0.985568	0.972143	1.06546	0.987082	1.02204	1.02486	1.05423	0.0935769
Q12899	Tripartite motif-containing protein 26 OS=Homo sapiens GN=TRIM26 PE=1 SV=1 - [TRI26_HUMAN]	11.13	5	5	16	539	62.1271	5.03369	0.977985	1.05704	0.984592	1.00654	1.10466	1.07791	1.04185	1.0748	1.06782	0.0937604
F8WCQ4	Rhomboid-like protein OS=Homo sapiens GN=PARL PE=1 SV=1 - [F8WCQ4_HUMAN]	11.56	2	2	4	173	19.5929	9.61279	0.96873	0.942617	0.708087	0.873145	1.00015	1.08908	1.1284	1.07254	1.22837	0.0939256
P24928	DNA-directed RNA polymerase II subunit RPB1 OS=Homo sapiens GN=POLR2A PE=1 SV=2 - [RPB1_HUMAN]	11.27	18	18	34	1970	217.039	7.37158	1.00973	0.995839	1.08188	1.02915	0.948777	0.986228	0.963808	0.966271	0.938903	0.0944069
A0A024R3N3	Amyloid beta (A4)-like protein 2, isoform CRA_a OS=Homo sapiens GN=APLP2 PE=4 SV=1 - [A0A024R3N3_HUMAN]	10	5	5	18	710	81.9274	4.80518	1.05673	1.05712	0.964557	1.02613	0.896652	0.853355	0.992312	0.914106	0.890825	0.094411
Q15645	Pachytene checkpoint protein 2 homolog OS=Homo sapiens GN=TRIP13 PE=1 SV=2 - [PCH2_HUMAN]	41.67	15	15	58	432	48.5205	6.0874	0.979943	0.971011	1.00234	0.98443	1.00876	1.00472	1.04689	1.02012	1.03626	0.0944385
P08240	Signal recognition particle receptor subunit alpha OS=Homo sapiens GN=SRPRA PE=1 SV=2 - [SRPRA_HUMAN]	21.47	13	13	30	638	69.7672	8.95361	1.01706	1.05796	1.09109	1.05537	0.942968	0.913519	1.034	0.963494	0.912941	0.0945434
Q9H8V3	Protein ECT2 OS=Homo sapiens GN=ECT2 PE=1 SV=4 - [ECT2_HUMAN]	19.15	14	14	36	914	103.439	7.7085	1.05754	1.08757	1.34581	1.16364	0.992755	0.968504	0.909898	0.957052	0.822465	0.0946927
C9J7T7	Nuclear receptor corepressor 2 OS=Homo sapiens GN=NCOR2 PE=1 SV=3 - [C9J7T7_HUMAN]	3.73	6	7	11	2062	220.866	7.34229	0.996986	1.15376	1.09521	1.08199	1.0282	0.909848	0.918664	0.952239	0.880085	0.094708
Q9NQ55	Suppressor of SWI4 1 homolog OS=Homo sapiens GN=PPAN PE=2 SV=1 - [SSF1_HUMAN]	12.26	5	5	12	473	53.1608	10.1255	1.27088	1.14515	0.945002	1.12035	0.73533	0.761815	1.01422	0.837121	0.7472	0.0949094
Q63HM4	Putative uncharacterized protein DKFZp686P18250 OS=Homo sapiens GN=DKFZp686P18250 PE=2 SV=1 - [Q63HM4_HUMAN]	9.37	5	5	7	758	83.736	4.90674	1.01762	1.00375	1.1946	1.07199	0.91738	0.977175	0.877607	0.924054	0.862	0.0949152
A8K7F7	cDNA FLJ76913, highly similar to Homo sapiens F-box protein 7 (FBXO7), mRNA OS=Homo sapiens PE=2 SV=1 - [A8K7F7_HUMAN]	9	4	4	8	522	58.4659	6.55127	0.908499	0.986166	0.979445	0.958037	1.02344	0.994331	1.04392	1.02057	1.06527	0.0949635
D6RB85	Calnexin (Fragment) OS=Homo sapiens GN=CANX PE=1 SV=1 - [D6RB85_HUMAN]	49.31	1	9	78	144	15.998	4.7417	0.845548	1.00536	1.03865	0.963186	1.23783	1.0344	1.16767	1.14663	1.19046	0.0952348
O14572	WUGSC:H_248O15.1 protein (Fragment) OS=Homo sapiens GN=WUGSC:H_248O15.1 PE=4 SV=1 - [O14572_HUMAN]	0.49	1	1	2	1849	206.731	6.25244		1.11272	1.28	1.19636		0.788046	0.935627	0.861836	0.720383	0.0955127
O96008	Mitochondrial import receptor subunit TOM40 homolog OS=Homo sapiens GN=TOMM40 PE=1 SV=1 - [TOM40_HUMAN]	27.98	7	7	39	361	37.8691	7.25439	1.00379	0.974306	0.96882	0.982304	0.997281	1.06473	1.03005	1.03069	1.04926	0.0957989
P26373	60S ribosomal protein L13 OS=Homo sapiens GN=RPL13 PE=1 SV=4 - [RL13_HUMAN]	39.34	9	9	79	211	24.2465	11.6489	1.1263	1.09126	0.967308	1.06162	0.809507	0.849599	1.01315	0.890753	0.83905	0.0959083
P50583	Bis(5'-nucleosyl)-tetraphosphatase [asymmetrical] OS=Homo sapiens GN=NUDT2 PE=1 SV=3 - [AP4A_HUMAN]	36.73	5	5	14	147	16.8186	5.35107	1.03079	1.0181	0.98657	1.01182	0.972085	0.952071	0.994475	0.972877	0.961511	0.0960747
A0A024QYV8	CP110 protein, isoform CRA_a OS=Homo sapiens GN=CP110 PE=4 SV=1 - [A0A024QYV8_HUMAN]	1.41	1	1	2	991	111.171	8.30908		0.926548	0.917496	0.922022		1.07641	0.999283	1.03785	1.12562	0.0964097
Q04917	14-3-3 protein eta OS=Homo sapiens GN=YWHAH PE=1 SV=4 - [1433F_HUMAN]	60.16	11	15	188	246	28.201	4.84326	0.981209	0.906604	0.950261	0.946025	0.987171	1.08038	1.00375	1.02377	1.08218	0.0966174
P61313	60S ribosomal protein L15 OS=Homo sapiens GN=RPL15 PE=1 SV=2 - [RL15_HUMAN]	40.69	9	9	46	204	24.1311	11.6196	1.0962	1.0795	0.994812	1.05684	0.830752	0.912423	1.01912	0.920766	0.871246	0.0966203
P63167	Dynein light chain 1, cytoplasmic OS=Homo sapiens GN=DYNLL1 PE=1 SV=1 - [DYL1_HUMAN]	57.3	2	4	11	89	10.3591	7.40088	1.00622	1.04953	1.16525	1.07366	0.975693	0.982167	0.855354	0.937738	0.8734	0.0966955
P25705	ATP synthase subunit alpha, mitochondrial OS=Homo sapiens GN=ATP5A1 PE=1 SV=1 - [ATPA_HUMAN]	44.67	23	23	154	553	59.7136	9.12939	0.994286	1.00424	0.965691	0.988071	1.00046	1.04133	1.03227	1.02469	1.03706	0.0967546
H7C3V9	Selenocysteine lyase (Fragment) OS=Homo sapiens GN=SCLY PE=1 SV=1 - [H7C3V9_HUMAN]	15.35	2	2	10	241	26.1812	6.91748	1.00341	0.995852	0.969405	0.989556	1.0772	1.00687	1.03333	1.03913	1.0501	0.0969279
P23396	40S ribosomal protein S3 OS=Homo sapiens GN=RPS3 PE=1 SV=2 - [RS3_HUMAN]	71.19	18	18	166	243	26.6714	9.65674	1.1211	1.0431	1.01455	1.05958	0.826987	0.928456	1.01523	0.923559	0.871623	0.0971011
A0A1B0GU86	Aminoacylase-1 OS=Homo sapiens GN=ACY1 PE=4 SV=1 - [A0A1B0GU86_HUMAN]	26.27	9	9	21	373	42.153	6.1001	0.980679	1.01461	0.951866	0.982384	1.0169	1.02419	1.02445	1.02184	1.04017	0.0972917
P20674	Cytochrome c oxidase subunit 5A, mitochondrial OS=Homo sapiens GN=COX5A PE=1 SV=2 - [COX5A_HUMAN]	16.67	3	3	15	150	16.7517	6.78564	1.07717	1.01955	1.00014	1.03229	0.956544	1.00015	0.968499	0.975063	0.944567	0.0973002
A8KAL2	cDNA FLJ76981, highly similar to Homo sapiens golgi autoantigen, golgin subfamily a, 5 (GOLGA5), mRNA OS=Homo sapiens PE=2 SV=1 - [A8KAL2_HUMAN]	10.4	5	5	9	731	82.9118	5.8335	1.00369	1.05444	1.02464	1.02759	0.999423	0.990844	0.995908	0.995391	0.968667	0.0973228
B7Z2S5	cDNA FLJ56075, highly similar to Thioredoxin reductase 1, cytoplasmic (EC 1.8.1.9) OS=Homo sapiens PE=2 SV=1 - [B7Z2S5_HUMAN]	49.73	22	23	126	547	59.9838	6.68311	0.897502	0.856264	0.951477	0.901748	1.09744	0.952368	0.988738	1.01285	1.12321	0.0974885
K7ER90	Eukaryotic translation initiation factor 3 subunit G (Fragment) OS=Homo sapiens GN=EIF3G PE=1 SV=1 - [K7ER90_HUMAN]	40.09	1	8	21	227	25.4258	5.49072	0.917577	0.986375	1.00994	0.971297	1.14827	0.997707	1.10981	1.08526	1.11733	0.0978856
H7BZK6	Ubiquitin carboxyl-terminal hydrolase 46 OS=Homo sapiens GN=USP46 PE=1 SV=1 - [H7BZK6_HUMAN]	5.31	1	1	2	339	39.4737	7.35693	0.932318		0.990896	0.961607	1.19247		1.08709	1.13978	1.18528	0.0979403
P62979	Ubiquitin-40S ribosomal protein S27a OS=Homo sapiens GN=RPS27A PE=1 SV=2 - [RS27A_HUMAN]	58.33	2	9	240	156	17.9535	9.64209	1.14949	1.0968	0.969071	1.07179	0.754185	0.831693	1.01815	0.868009	0.809872	0.0982693
K7EPJ1	Ubiquitin-conjugating enzyme E2 S (Fragment) OS=Homo sapiens GN=UBE2S PE=1 SV=1 - [K7EPJ1_HUMAN]	20.1	3	3	8	204	22.4336	6.29053	1.0368	0.973001	1.10403	1.03794	0.902594	0.996468	0.879635	0.926233	0.892373	0.098358
Q14WI3	NADH-ubiquinone oxidoreductase chain 1 (Fragment) OS=Homo sapiens PE=3 SV=1 - [Q14WI3_HUMAN]	25.64	2	2	4	78	8.58378	9.77393	0.907927		1.04736	0.977641	1.21928		1.17088	1.19508	1.22241	0.0984593
Q5TDH0	Protein DDI1 homolog 2 OS=Homo sapiens GN=DDI2 PE=1 SV=1 - [DDI2_HUMAN]	19.05	6	6	18	399	44.4945	5.04639	0.999092	1.01848	0.926063	0.98121	1.02068	1.09497	1.0555	1.05705	1.07729	0.0987281
P52788	Spermine synthase OS=Homo sapiens GN=SMS PE=1 SV=2 - [SPSY_HUMAN]	38.8	12	12	47	366	41.2418	5.021	0.960773	0.994936	0.958336	0.971348	1.08314	0.999741	1.01355	1.03214	1.06259	0.0988785
Q5QNY5	Peroxisomal biogenesis factor 19 (Fragment) OS=Homo sapiens GN=PEX19 PE=1 SV=1 - [Q5QNY5_HUMAN]	12.77	3	3	4	235	26.1204	4.43701	1.01755	0.971934	1.01134	1.00028	0.977692	0.918327	0.959505	0.951841	0.951579	0.0991181
P49327	Fatty acid synthase OS=Homo sapiens GN=FASN PE=1 SV=3 - [FAS_HUMAN]	42.65	87	87	652	2511	273.254	6.44287	0.988864	1.04917	1.12252	1.05352	1.00068	0.932002	0.94565	0.959446	0.910706	0.0991883
Q32P41	tRNA (guanine(37)-N1)-methyltransferase OS=Homo sapiens GN=TRMT5 PE=1 SV=2 - [TRM5_HUMAN]	11.2	5	5	8	509	58.2092	8.6167	0.882473	0.994747	0.971164	0.949462	1.11826	0.987994	1.06995	1.05873	1.11509	0.0993812
H0YG25	Transcription factor ETV6 (Fragment) OS=Homo sapiens GN=ETV6 PE=1 SV=1 - [H0YG25_HUMAN]	7.95	1	1	3	88	10.3142	5.8208	1.02559	1.12973	1.24984	1.13505	1.01951	0.933308	1.00358	0.985467	0.868213	0.0993992
P55145	Mesencephalic astrocyte-derived neurotrophic factor OS=Homo sapiens GN=MANF PE=1 SV=3 - [MANF_HUMAN]	46.7	9	9	51	182	20.6868	8.68994	0.979599	1.04535	1.02684	1.01726	0.995412	0.942236	0.949363	0.962337	0.946006	0.0994722
Q9P016	Thymocyte nuclear protein 1 OS=Homo sapiens GN=THYN1 PE=1 SV=1 - [THYN1_HUMAN]	41.33	10	10	27	225	25.681	9.24658	0.980493	0.956902	0.985484	0.974293	1.02847	0.985392	1.00642	1.00676	1.03332	0.100228
D3DSV0	HCG2043421, isoform CRA_b OS=Homo sapiens GN=hCG_2043421 PE=4 SV=1 - [D3DSV0_HUMAN]	25.7	4	4	7	179	19.7553	5.63037	1.00531	1.18509	1.47381	1.2214	0.906929	0.977188	0.892487	0.925535	0.757763	0.100271
A0A024R9Q8	Recombining binding protein suppressor of hairless (Drosophila), isoform CRA_a OS=Homo sapiens GN=RBPSUH PE=4 SV=1 - [A0A024R9Q8_HUMAN]	11.06	4	4	8	425	47.1503	6.44287	1.02484	1.07145	1.00633	1.0342	0.9766	1.00642	0.983112	0.98871	0.95601	0.100467
Q53GJ1	DEAD (Asp-Glu-Ala-Asp) box polypeptide 47 isoform 1 variant (Fragment) OS=Homo sapiens PE=2 SV=1 - [Q53GJ1_HUMAN]	34.38	13	13	40	448	49.8504	9.24658	1.07404	1.06881	1.01805	1.05363	0.87032	0.883389	1.04035	0.931353	0.883945	0.100479
Q9ULR3	Protein phosphatase 1H OS=Homo sapiens GN=PPM1H PE=1 SV=2 - [PPM1H_HUMAN]	5.06	2	2	4	514	56.4126	6.59521	0.873384		0.913915	0.893649	1.11325		1.00636	1.0598	1.18593	0.10077
A0A0J9YXB3	Uncharacterized protein OS=Homo sapiens PE=4 SV=1 - [A0A0J9YXB3_HUMAN]	59.39	4	9	57	165	18.8387	8.54346	0.962018	1.0106	0.900392	0.957672	1.03817	1.01311	1.13691	1.06273	1.1097	0.100801
P35606	Coatomer subunit beta' OS=Homo sapiens GN=COPB2 PE=1 SV=2 - [COPB2_HUMAN]	40.62	33	33	103	906	102.422	5.2749	0.996599	0.956505	0.943783	0.965629	0.990017	1.01506	1.00323	1.00277	1.03846	0.100828
B3KY23	cDNA FLJ46643 fis, clone TRACH3003357, highly similar to Homo sapiens SH3 domain protein D19 (SH3D19), mRNA OS=Homo sapiens PE=2 SV=1 - [B3KY23_HUMAN]	1.47	1	1	2	545	60.8752	8.25049		1.04842	1.05074	1.04958		0.937864	0.820478	0.879171	0.837639	0.101011
Q8NG31	Protein CASC5 OS=Homo sapiens GN=CASC5 PE=1 SV=3 - [CASC5_HUMAN]	1.32	3	3	5	2342	265.224	5.46533	1.0269	1.0549	1.32113	1.13431	1.03553	0.798477	0.73664	0.856882	0.755419	0.101079
A0A075B784	Ubiquitin carboxyl-terminal hydrolase 36 OS=Homo sapiens GN=USP36 PE=1 SV=1 - [A0A075B784_HUMAN]	3.64	3	3	6	961	104.326	9.75928	1.07884	1.12701	0.976437	1.06076	0.844546	0.933457	1.00075	0.926252	0.873194	0.101093
B4DW34	cDNA FLJ56798, highly similar to Acid sphingomyelinase-like phosphodiesterase 3b (EC 3.1.4.-) OS=Homo sapiens PE=2 SV=1 - [B4DW34_HUMAN]	20.66	7	7	15	455	50.7531	5.64307	0.996123	0.983548	0.959207	0.979626	1.00094	1.08382	1.02523	1.03666	1.05822	0.101133
Q9Y2P8	RNA 3'-terminal phosphate cyclase-like protein OS=Homo sapiens GN=RCL1 PE=1 SV=3 - [RCL1_HUMAN]	18.5	4	4	8	373	40.8166	9.26123	1.13741	1.16829	0.971956	1.09255	0.854981	0.739973	1.02637	0.873774	0.799756	0.101219
P61513	60S ribosomal protein L37a OS=Homo sapiens GN=RPL37A PE=1 SV=2 - [RL37A_HUMAN]	58.7	6	6	41	92	10.2685	10.4331	1.1217	1.00861	0.998794	1.04303	0.742001	0.904453	0.976007	0.874153	0.838088	0.101381
C9JQD4	Peptidyl-prolyl cis-trans isomerase (Fragment) OS=Homo sapiens GN=PPIH PE=1 SV=1 - [C9JQD4_HUMAN]	38.19	5	6	20	144	15.79	8.71924	1.01224	0.951848	0.907095	0.95706	0.98603	1.08225	1.09262	1.05363	1.10091	0.101602
A8K940	cDNA FLJ77630, highly similar to Homo sapiens BPY2 interacting protein 1, mRNA OS=Homo sapiens PE=1 SV=1 - [A8K940_HUMAN]	8.59	7	7	13	1059	112.158	7.29834	0.946182	0.910518	0.958121	0.938274	1.14703	1.03984	0.968771	1.05188	1.12108	0.102059
P52294	Importin subunit alpha-5 OS=Homo sapiens GN=KPNA1 PE=1 SV=3 - [IMA5_HUMAN]	19.89	5	10	30	538	60.1836	5.0083	1.01905	0.987115	0.926809	0.977657	1.00469	1.09384	1.07965	1.05939	1.0836	0.102128
I3L2B0	Clustered mitochondria protein homolog (Fragment) OS=Homo sapiens GN=CLUH PE=1 SV=2 - [I3L2B0_HUMAN]	16.59	1	18	47	1236	138.142	6.03662	1.09615	0.986073	1.04621	1.04281	0.804779	1.00296	0.905819	0.904518	0.867385	0.102213
A0A024R5L7	Phosphatidylinositol binding clathrin assembly protein, isoform CRA_c OS=Homo sapiens GN=PICALM PE=4 SV=1 - [A0A024R5L7_HUMAN]	18.03	9	9	18	610	66.3508	8.80713	0.971327	0.898963	0.894139	0.921476	1.02952	0.944007	1.03629	1.00327	1.08877	0.102679
R4GMM1	Protein MINOS1-NBL1 (Fragment) OS=Homo sapiens GN=MINOS1-NBL1 PE=4 SV=1 - [R4GMM1_HUMAN]	17.39	1	1	3	46	5.14965	7.44482		0.974707	0.947253	0.96098		1.04914	1.01008	1.02961	1.07142	0.102683
Q5T6H7	Xaa-Pro aminopeptidase 1 OS=Homo sapiens GN=XPNPEP1 PE=1 SV=1 - [Q5T6H7_HUMAN]	35.87	8	18	42	552	62.0995	5.73193	0.968116	0.942704	0.956947	0.955922	0.9838	0.969844	1.0207	0.991449	1.03716	0.102818
H7BZW5	Cysteine protease ATG4C (Fragment) OS=Homo sapiens GN=ATG4C PE=1 SV=2 - [H7BZW5_HUMAN]	8.18	1	1	2	110	12.291	4.52588		1.02337	1.05246	1.03792		0.939194	0.983756	0.961475	0.926351	0.102828
B4DMI9	cDNA FLJ55894, highly similar to Discs large homolog 7 OS=Homo sapiens PE=2 SV=1 - [B4DMI9_HUMAN]	4.55	4	4	5	792	88.8734	8.52881	1.13043	1.07077	1.08529	1.09549	0.84269	1.0762	0.918099	0.945662	0.863229	0.102829
B4E321	Protein OS-9 OS=Homo sapiens GN=OS9 PE=1 SV=1 - [B4E321_HUMAN]	5.67	3	3	3	406	46.2735	4.84326	1.13424		1.08174	1.10799	0.871621		0.985324	0.928472	0.837977	0.103181
Q9H4A4	Aminopeptidase B OS=Homo sapiens GN=RNPEP PE=1 SV=2 - [AMPB_HUMAN]	37.85	22	22	75	650	72.5495	5.74463	0.978411	0.991087	0.999725	0.989741	1.03048	1.00084	1.007	1.01277	1.02327	0.103258
Q00796	Sorbitol dehydrogenase OS=Homo sapiens GN=SORD PE=1 SV=4 - [DHSO_HUMAN]	41.74	14	14	86	357	38.2998	7.97217	0.951335	0.999254	0.985621	0.978737	1.02955	1.021	0.995898	1.01548	1.03754	0.10326
P08237	ATP-dependent 6-phosphofructokinase, muscle type OS=Homo sapiens GN=PFKM PE=1 SV=2 - [PFKAM_HUMAN]	29.49	17	20	81	780	85.1284	7.98682	0.997221	0.962012	0.971237	0.976824	0.995699	1.00568	0.998236	0.99987	1.02359	0.103277
O95239	Chromosome-associated kinesin KIF4A OS=Homo sapiens GN=KIF4A PE=1 SV=3 - [KIF4A_HUMAN]	18.02	21	22	39	1232	139.794	6.26514	1.02366	1.04347	1.12714	1.06476	0.993588	1.0163	0.950175	0.986689	0.92668	0.10364
Q9UH51	Low density lipoprotein receptor (Fragment) OS=Homo sapiens GN=LDLR PE=4 SV=1 - [Q9UH51_HUMAN]	12.19	8	9	13	837	92.8543	5.0083	0.985191	1.14686	1.01768	1.04991	0.932276	0.943871	0.958857	0.945001	0.900078	0.103721
P56182	Ribosomal RNA processing protein 1 homolog A OS=Homo sapiens GN=RRP1 PE=1 SV=1 - [RRP1_HUMAN]	31.02	12	12	30	461	52.8066	9.33447	1.12714	1.08905	0.958078	1.05809	0.825908	0.906108	0.995818	0.909278	0.859359	0.103856
P84157	Matrix-remodeling-associated protein 7 OS=Homo sapiens GN=MXRA7 PE=1 SV=1 - [MXRA7_HUMAN]	4.9	1	1	3	204	21.4524	4.25928	1.04962	0.994661	1.07374	1.03934	0.962608	0.939635	0.73281	0.878351	0.845107	0.103867
P38606	V-type proton ATPase catalytic subunit A OS=Homo sapiens GN=ATP6V1A PE=1 SV=2 - [VATA_HUMAN]	43.44	23	23	104	617	68.2605	5.51611	0.951809	0.965345	0.997628	0.971594	1.03437	0.995648	0.999937	1.00998	1.03951	0.103904
Q53H96	Pyrroline-5-carboxylate reductase 3 OS=Homo sapiens GN=PYCRL PE=1 SV=3 - [P5CR3_HUMAN]	27.01	5	5	12	274	28.6449	7.72314	1.06457	1.03894	1.04717	1.05023	0.9799	0.940158	1.04066	0.986906	0.939709	0.103908
O95453	Poly(A)-specific ribonuclease PARN OS=Homo sapiens GN=PARN PE=1 SV=1 - [PARN_HUMAN]	17.68	11	11	18	639	73.4048	6.20166	1.05822	1.07974	0.954317	1.03076	0.881445	0.911679	0.986405	0.926509	0.89886	0.104055
Q53HJ8	PKCI-1-related HIT protein variant (Fragment) OS=Homo sapiens PE=2 SV=1 - [Q53HJ8_HUMAN]	26.99	3	3	13	163	17.1633	9.48096	0.958001	1.04471	0.841458	0.948058	1.07879	1.0516	1.24642	1.1256	1.18727	0.104177
A0A090N8P3	FK506 binding protein 9, 63 kDa OS=Homo sapiens GN=FKBP9 PE=4 SV=1 - [A0A090N8P3_HUMAN]	18.6	10	10	35	570	63.0165	5.08447	1.03911	1.04982	1.08382	1.05758	1.03523	1.00815	0.949912	0.997762	0.943436	0.104217
P00374	Dihydrofolate reductase OS=Homo sapiens GN=DHFR PE=1 SV=2 - [DYR_HUMAN]	40.11	6	6	17	187	21.439	7.41553	1.04945	0.968203	0.997729	1.00513	0.866771	0.970202	0.935896	0.92429	0.919574	0.104247
Q6P161	39S ribosomal protein L54, mitochondrial OS=Homo sapiens GN=MRPL54 PE=1 SV=1 - [RM54_HUMAN]	7.25	1	1	2	138	15.8092	9.59814		1.02899	1.11635	1.07267		0.928728	0.956084	0.942406	0.878559	0.104469
P63151	Serine/threonine-protein phosphatase 2A 55 kDa regulatory subunit B alpha isoform OS=Homo sapiens GN=PPP2R2A PE=1 SV=1 - [2ABA_HUMAN]	9.17	4	4	4	447	51.6595	6.20166	1.0365	0.997048		1.01677	0.963137	0.956659		0.959898	0.944062	0.104515
Q05209	Tyrosine-protein phosphatase non-receptor type 12 OS=Homo sapiens GN=PTPN12 PE=1 SV=3 - [PTN12_HUMAN]	6.92	4	4	7	780	88.0514	5.61768	0.967397	1.01133	0.959119	0.979283	1.07373	1.06464	0.991643	1.04334	1.06541	0.104587
P60604	Ubiquitin-conjugating enzyme E2 G2 OS=Homo sapiens GN=UBE2G2 PE=1 SV=1 - [UB2G2_HUMAN]	23.64	2	2	4	165	18.5541	4.70361	1.01399	1.11413	1.07857	1.0689	0.784128	0.696666	1.04471	0.841836	0.787576	0.104657
B4DS79	cDNA FLJ56828, highly similar to Adapter-relatedprotein complex 1 beta-1 subunit OS=Homo sapiens PE=2 SV=1 - [B4DS79_HUMAN]	21.64	1	9	28	499	53.8176	4.69092		0.927254	0.964217	0.945735		1.00817	1.05666	1.03242	1.09165	0.104658
A0A024R6M2	KIAA2010, isoform CRA_a OS=Homo sapiens GN=KIAA2010 PE=4 SV=1 - [A0A024R6M2_HUMAN]	14.15	7	12	23	820	93.8371	4.89404	0.919291	0.993876	1.00836	0.973843	1.07627	1.00435	1.06237	1.04766	1.0758	0.10474
A0A0F7NGI8	Leucine rich repeat (In FLII) interacting protein 1, isoform CRA_c OS=Homo sapiens GN=LRRFIP1 PE=2 SV=1 - [A0A0F7NGI8_HUMAN]	36.17	22	23	73	752	82.6386	4.61475	1.00728	0.940562	0.884741	0.944194	1.04444	1.01614	1.00572	1.0221	1.08251	0.104742
Q9Y2R4	Probable ATP-dependent RNA helicase DDX52 OS=Homo sapiens GN=DDX52 PE=1 SV=3 - [DDX52_HUMAN]	24.04	12	13	27	599	67.4559	9.67139	1.0848	1.25425	0.910097	1.08305	0.802409	0.741383	0.960238	0.834677	0.770672	0.104831
P11177	Pyruvate dehydrogenase E1 component subunit beta, mitochondrial OS=Homo sapiens GN=PDHB PE=1 SV=3 - [ODPB_HUMAN]	31.75	9	9	36	359	39.208	6.65381	0.989081	0.987816	0.96512	0.980672	0.989102	1.03962	1.07166	1.03346	1.05383	0.104858
Q15696	U2 small nuclear ribonucleoprotein auxiliary factor 35 kDa subunit-related protein 2 OS=Homo sapiens GN=ZRSR2 PE=1 SV=2 - [U2AFM_HUMAN]	3.32	2	2	3	482	58.0089	9.71533		0.928957	0.890376	0.909667		1.07309	0.994548	1.03382	1.13648	0.104994
Q6IN84	rRNA methyltransferase 1, mitochondrial OS=Homo sapiens GN=MRM1 PE=1 SV=1 - [MRM1_HUMAN]	10.76	4	4	6	353	38.614	7.94287	0.959157	1.01089	1.00073	0.990262	1.12229	1.09688	1.00182	1.07367	1.08422	0.105008
Q9BRT3	Migration and invasion enhancer 1 OS=Homo sapiens GN=MIEN1 PE=1 SV=1 - [MIEN1_HUMAN]	6.09	1	1	4	115	12.3952	4.37354	0.87766	0.97059	0.995634	0.947961	1.04413	1.01994	1.01248	1.02551	1.08181	0.105027
Q96C90	Protein phosphatase 1 regulatory subunit 14B OS=Homo sapiens GN=PPP1R14B PE=1 SV=3 - [PP14B_HUMAN]	16.33	1	1	4	147	15.901	4.85596		1.18577	1.04914	1.11746		0.906548	0.9337	0.920124	0.823409	0.105268
C9JJQ5	Ras-related protein Rab-19 (Fragment) OS=Homo sapiens GN=RAB19 PE=1 SV=1 - [C9JJQ5_HUMAN]	7.38	1	1	2	149	17.0306	7.09326		0.928696	0.946501	0.937599		1.1757	1.05234	1.11402	1.18816	0.105419
Q6NT72	UNC84B protein (Fragment) OS=Homo sapiens GN=UNC84B PE=2 SV=1 - [Q6NT72_HUMAN]	16.97	5	5	9	442	49.3932	5.71924	1.02907	1.11547	1.18041	1.10832	1.04561	0.934629	1.00409	0.994777	0.897556	0.105594
Q9H0C8	Integrin-linked kinase-associated serine/threonine phosphatase 2C OS=Homo sapiens GN=ILKAP PE=1 SV=1 - [ILKAP_HUMAN]	13.27	5	5	12	392	42.8798	7.09326	1.00769	1.04756	0.992702	1.01598	1.07408	1.1391	1.04138	1.08485	1.06779	0.105624
B7Z201	cDNA FLJ61224 OS=Homo sapiens PE=2 SV=1 - [B7Z201_HUMAN]	4.6	2	2	3	500	56.9027	8.44092	1.0165	1.03729		1.0269	0.999376	0.990317		0.994846	0.968788	0.10567
Q6MZZ4	ETS-related transcription factor Elf-1 OS=Homo sapiens GN=DKFZp686H0575 PE=1 SV=1 - [Q6MZZ4_HUMAN]	19.94	5	5	13	361	38.9719	8.49951	0.98488	1.07775	1.05494	1.03919	0.989772	0.95778	0.984864	0.977472	0.940609	0.105918
A8K6G9	cDNA FLJ76871, highly similar to Homo sapiens DEAH (Asp-Glu-Ala-His) box polypeptide 38 (DHX38), mRNA OS=Homo sapiens PE=2 SV=1 - [A8K6G9_HUMAN]	9.45	10	10	22	1227	140.387	6.53662	0.996338	0.967803	0.981638	0.981926	0.988762	1.02584	1.04175	1.01878	1.03753	0.106142
P56545	C-terminal-binding protein 2 OS=Homo sapiens GN=CTBP2 PE=1 SV=1 - [CTBP2_HUMAN]	17.53	3	8	18	445	48.9141	6.94678	1.0102	1.05488	1.01128	1.02545	0.965204	0.902403	1.00348	0.95703	0.933278	0.106332
Q96BS2	Calcineurin B homologous protein 3 OS=Homo sapiens GN=TESC PE=1 SV=3 - [CHP3_HUMAN]	41.12	7	7	17	214	24.7341	4.93213	1.0819	1.05943	1.10565	1.08233	0.870776	0.964381	1.0608	0.96532	0.891894	0.106929
P49736	DNA replication licensing factor MCM2 OS=Homo sapiens GN=MCM2 PE=1 SV=4 - [MCM2_HUMAN]	36.28	29	29	116	904	101.832	5.51611	1.05171	1.00882	1.05726	1.03927	0.924969	1.01095	0.993339	0.976419	0.939528	0.107238
B7Z8W3	cDNA FLJ53272, highly similar to Homo sapiens LIM domain 7 (LMO7), mRNA OS=Homo sapiens PE=2 SV=1 - [B7Z8W3_HUMAN]	27.45	31	31	92	1275	145.362	7.45947	0.990489	0.943042	0.915229	0.949587	1.00476	1.03743	0.978732	1.00697	1.06043	0.107637
B4DL66	cDNA FLJ56297, highly similar to Rattus norvegicus ubiquitin-conjugating enzyme E2Z (putative) (Ube2z), mRNA OS=Homo sapiens PE=2 SV=1 - [B4DL66_HUMAN]	15.33	4	4	10	287	32.871	6.84424	1.00165	0.944103	0.933906	0.959887	1.01876	0.985142	1.04608	1.01666	1.05915	0.107736
P49720	Proteasome subunit beta type-3 OS=Homo sapiens GN=PSMB3 PE=1 SV=2 - [PSB3_HUMAN]	31.71	5	5	19	205	22.9335	6.55127	0.993852	0.93764	0.972214	0.967902	0.995064	1.07755	1.01521	1.02927	1.06341	0.108007
P30084	Enoyl-CoA hydratase, mitochondrial OS=Homo sapiens GN=ECHS1 PE=1 SV=4 - [ECHM_HUMAN]	52.76	14	14	50	290	31.3671	8.07471	1.02625	1.01802	0.964081	1.00278	1.04279	1.05764	1.03524	1.04522	1.04232	0.108155
B4DZG2	cDNA FLJ56521, highly similar to Homo sapiens transcription termination factor, RNA polymerase I (TTF1), mRNA OS=Homo sapiens PE=2 SV=1 - [B4DZG2_HUMAN]	3.54	2	2	3	905	102.927	9.37842	1.10259	1.00982		1.05621	0.934863	0.91074		0.922802	0.873692	0.108465
B4DJV5	Periodic tryptophan protein 1 homolog OS=Homo sapiens GN=PWP1 PE=1 SV=1 - [B4DJV5_HUMAN]	7.52	3	3	3	439	49.0078	4.77979	1.05458	1.16379	0.929364	1.04924	0.866426	0.865661	0.957069	0.896385	0.854315	0.108479
Q06310	MHC class I promoter binding protein (Fragment) OS=Homo sapiens PE=2 SV=1 - [Q06310_HUMAN]	9.09	2	2	5	231	25.5493	6.87354	1.05203	1.11794	0.993631	1.05453	0.928959	0.985638	0.994001	0.969533	0.919395	0.108755
G3V5K2	Nuclear envelope integral membrane protein 1 OS=Homo sapiens GN=NEMP1 PE=1 SV=1 - [G3V5K2_HUMAN]	8.18	1	1	2	110	12.0192	7.86963		0.908699	0.88232	0.895509		1.10907	0.998321	1.0537	1.17665	0.108775
Q5JTH9	RRP12-like protein OS=Homo sapiens GN=RRP12 PE=1 SV=2 - [RRP12_HUMAN]	22.13	24	25	58	1297	143.611	8.74854	1.22511	1.21516	0.983331	1.1412	0.693553	0.772571	1.08084	0.848989	0.743943	0.108935
Q59EA5	Tripartite motif-containing 38 variant (Fragment) OS=Homo sapiens PE=2 SV=1 - [Q59EA5_HUMAN]	4.03	1	1	3	298	34.1971	6.78564	0.982109	1.01211	0.936505	0.976908	1.04905	1.08713	1.00028	1.04549	1.0702	0.109211
P62266	40S ribosomal protein S23 OS=Homo sapiens GN=RPS23 PE=1 SV=3 - [RS23_HUMAN]	30.07	6	6	59	143	15.7977	10.4917	1.05509	1.04742	0.992353	1.03162	0.905001	0.864898	1.01787	0.929257	0.900775	0.109395
Q06830	Peroxiredoxin-1 OS=Homo sapiens GN=PRDX1 PE=1 SV=1 - [PRDX1_HUMAN]	76.38	11	14	228	199	22.0963	8.1333	0.95497	0.968855	0.956837	0.960221	1.09323	1.01223	0.981731	1.02906	1.0717	0.109458
H3BN98	Uncharacterized protein (Fragment) OS=Homo sapiens PE=4 SV=2 - [H3BN98_HUMAN]	23.21	1	6	54	237	27.1504	9.5542	1.13381	1.03178	1.01034	1.05864	0.822958	0.949662	1.00149	0.924703	0.87348	0.109505
F6T1Q0	2',5'-phosphodiesterase 12 OS=Homo sapiens GN=PDE12 PE=1 SV=1 - [F6T1Q0_HUMAN]	25.64	8	8	16	472	52.1427	7.84033	1.04223	0.977124	0.980348	0.9999	1.112	1.03383	1.05002	1.06528	1.06539	0.109568
C9J9K3	40S ribosomal protein SA (Fragment) OS=Homo sapiens GN=RPSA PE=1 SV=8 - [C9J9K3_HUMAN]	41.44	10	10	106	263	29.386	5.24951	1.05388	1.09333	0.973185	1.04013	0.888056	0.871408	1.01229	0.923918	0.888268	0.110165
P07205	Phosphoglycerate kinase 2 OS=Homo sapiens GN=PGK2 PE=1 SV=3 - [PGK2_HUMAN]	16.79	2	7	127	417	44.7673	8.54346	0.907903	0.98719	0.950445	0.948513	1.15299	1.02391	0.996464	1.05779	1.11521	0.110224
P61088	Ubiquitin-conjugating enzyme E2 N OS=Homo sapiens GN=UBE2N PE=1 SV=1 - [UBE2N_HUMAN]	44.74	7	7	38	152	17.127	6.56592	0.998917	0.966015	0.955857	0.973596	0.996127	1.03744	1.00049	1.01135	1.03878	0.110226
P15924	Desmoplakin OS=Homo sapiens GN=DSP PE=1 SV=3 - [DESP_HUMAN]	31.94	85	85	209	2871	331.569	6.81494	1.0236	1.05153	1.06176	1.04563	1.01835	1.00613	0.931109	0.985196	0.942203	0.110388
Q8IY17	Neuropathy target esterase OS=Homo sapiens GN=PNPLA6 PE=1 SV=2 - [PLPL6_HUMAN]	2.05	2	2	3	1366	149.9	7.81104	0.921117	0.938482		0.9298	1.02856	1.13916		1.08386	1.1657	0.11055
P46778	60S ribosomal protein L21 OS=Homo sapiens GN=RPL21 PE=1 SV=2 - [RL21_HUMAN]	30.63	7	7	41	160	18.5531	10.4917	1.091	1.11033	1.01388	1.07174	0.900771	0.883628	1.05372	0.946041	0.882717	0.110766
B3KS71	cDNA FLJ35671 fis, clone SPLEN2018180, highly similar to Cartilage-associated protein OS=Homo sapiens PE=2 SV=1 - [B3KS71_HUMAN]	16.91	5	5	10	343	39.9657	5.32568	1.00627	1.11958	1.16466	1.09684	1.05218	0.929724	0.860941	0.947616	0.863954	0.110876
P48735	Isocitrate dehydrogenase [NADP], mitochondrial OS=Homo sapiens GN=IDH2 PE=1 SV=2 - [IDHP_HUMAN]	43.81	17	18	58	452	50.8769	8.68994	0.95542	1.00505	1.00636	0.988945	1.04984	1.00761	1.0375	1.03165	1.04318	0.110965
A0A024R819	Nudix (Nucleoside diphosphate linked moiety X)-type motif 1, isoform CRA_a OS=Homo sapiens GN=NUDT1 PE=3 SV=1 - [A0A024R819_HUMAN]	29.49	4	4	14	156	17.94	5.08447	0.934219	0.89483	0.998597	0.942549	1.00986	0.991539	1.01703	1.00615	1.06747	0.110996
A0A0A0MR33	Maleylacetoacetate isomerase OS=Homo sapiens GN=GSTZ1 PE=1 SV=1 - [A0A0A0MR33_HUMAN]	12.64	2	2	4	174	19.361	7.18115	0.939682	0.962622	0.724221	0.875509	0.963976	1.08414	1.17926	1.07579	1.22876	0.111032
C9J0I9	Nuclear-interacting partner of ALK OS=Homo sapiens GN=ZC3HC1 PE=1 SV=1 - [C9J0I9_HUMAN]	5.23	2	2	2	459	50.5299	5.8208	1.02505	1.01396		1.01951	1.08125	1.04964		1.06544	1.04506	0.111192
H0YJ17	Neuroguidin (Fragment) OS=Homo sapiens GN=NGDN PE=1 SV=1 - [H0YJ17_HUMAN]	12.93	3	3	13	263	30.0387	9.45166	1.07018	0.993775	0.963068	1.00901	0.851834	0.932633	0.962324	0.915597	0.907424	0.11139
E7EVA0	Microtubule-associated protein OS=Homo sapiens GN=MAP4 PE=1 SV=1 - [E7EVA0_HUMAN]	19.16	40	40	155	2297	245.292	6.22705	0.995109	1.00716	0.980419	0.994231	0.988951	0.95297	0.956151	0.966024	0.97163	0.111531
F5H2C9	N-alpha-acetyltransferase 40 OS=Homo sapiens GN=NAA40 PE=1 SV=1 - [F5H2C9_HUMAN]	9.68	1	1	5	124	13.8666	8.55811	1.05353	0.890715	1.14297	1.02907	0.849245	0.887504	0.892825	0.876525	0.851763	0.11207
O75909	Cyclin-K OS=Homo sapiens GN=CCNK PE=1 SV=2 - [CCNK_HUMAN]	13.79	5	5	8	580	64.1987	8.41162	1.025	1.00994	1.03277	1.02257	0.947177	1.00804	0.993608	0.982942	0.961248	0.112546
A0A0S2Z3K9	V-crk sarcoma virus CT10 oncogene-like protein isoform 2 OS=Homo sapiens GN=CRK PE=2 SV=1 - [A0A0S2Z3K9_HUMAN]	33.33	1	5	24	204	22.8915	5.47803		1.06256	1.06152	1.06204		1.03184	0.996782	1.01431	0.955061	0.11265
E4W6B6	RPL27/NME2 fusion protein (Fragment) OS=Homo sapiens GN=RPL27 PE=2 SV=1 - [E4W6B6_HUMAN]	57.14	7	8	63	126	14.248	10.4624	1.06271	1.05218	1.00777	1.04089	0.760038	0.880312	1.01802	0.886122	0.851315	0.112781
Q6P4A7	Sideroflexin-4 OS=Homo sapiens GN=SFXN4 PE=1 SV=1 - [SFXN4_HUMAN]	17.51	4	4	8	337	37.9738	9.18799	0.952353	1.07823	1.01978	1.01679	0.964884	0.925813	0.924719	0.938472	0.922978	0.112977
Q9NYF8	Bcl-2-associated transcription factor 1 OS=Homo sapiens GN=BCLAF1 PE=1 SV=2 - [BCLF1_HUMAN]	21.63	21	21	71	920	106.059	9.979	1.01957	0.939	0.886547	0.948374	1.00771	1.06835	1.02746	1.03451	1.09082	0.113301
O43148	mRNA cap guanine-N7 methyltransferase OS=Homo sapiens GN=RNMT PE=1 SV=1 - [MCES_HUMAN]	21.01	10	10	24	476	54.8093	6.60986	0.932373	1.04197	0.995051	0.989797	1.07961	1.03646	1.06011	1.05873	1.06964	0.113389
P51532	Transcription activator BRG1 OS=Homo sapiens GN=SMARCA4 PE=1 SV=2 - [SMCA4_HUMAN]	10.32	15	15	29	1647	184.53	7.88428	1.0567	1.00341	1.13305	1.06439	0.921249	1.03024	0.847012	0.932833	0.876406	0.113661
F8VYY9	5'-AMP-activated protein kinase subunit gamma-1 OS=Homo sapiens GN=PRKAG1 PE=1 SV=1 - [F8VYY9_HUMAN]	26.43	7	7	21	280	31.8852	8.57275	1.00219	0.956863	0.957705	0.972254	1.013	0.989801	1.03939	1.01406	1.043	0.113783
F5H0M4	Lysophospholipid acyltransferase 5 OS=Homo sapiens GN=LPCAT3 PE=1 SV=1 - [F5H0M4_HUMAN]	17.29	5	5	9	347	39.3491	7.43018	0.937159	0.91695	1.01773	0.957279	1.13706	1.0198	1.01771	1.05819	1.10542	0.113888
P10155	60 kDa SS-A/Ro ribonucleoprotein OS=Homo sapiens GN=TROVE2 PE=1 SV=2 - [RO60_HUMAN]	23.42	11	11	28	538	60.6312	8.03076	0.944458	1.01278	1.00228	0.986506	1.14639	1.01506	1.06334	1.07493	1.08963	0.113903
A0A087WVA8	Testis-expressed sequence 2 protein OS=Homo sapiens GN=TEX2 PE=1 SV=1 - [A0A087WVA8_HUMAN]	1.86	2	2	2	1127	125.306	6.06201	0.826918		0.876475	0.851697	1.17919		1.00734	1.09326	1.28363	0.114072
P22102	Trifunctional purine biosynthetic protein adenosine-3 OS=Homo sapiens GN=GART PE=1 SV=1 - [PUR2_HUMAN]	39.41	29	34	130	1010	107.699	6.69775	0.990274	0.978423	1.00215	0.990281	0.998597	1.01452	1.03738	1.01683	1.02681	0.114117
H0YCE7	Acidic fibroblast growth factor intracellular-binding protein (Fragment) OS=Homo sapiens GN=FIBP PE=1 SV=1 - [H0YCE7_HUMAN]	9.49	1	1	4	137	15.6378	5.19873	0.978728	1.00265	0.96799	0.983124	1.07124	1.00961	1.18496	1.0886	1.10729	0.114251
Q9NUQ7	Ufm1-specific protease 2 OS=Homo sapiens GN=UFSP2 PE=1 SV=3 - [UFSP2_HUMAN]	9.17	4	4	5	469	53.2272	7.00537	1.05324	0.966524	1.10685	1.04221	0.906109	0.991511	0.940265	0.945961	0.907654	0.114483
Q6ZRV2	Protein FAM83H OS=Homo sapiens GN=FAM83H PE=1 SV=3 - [FA83H_HUMAN]	20.53	16	16	30	1179	127.044	6.97607	1.02399	1.01372	1.01525	1.01765	0.882259	0.992072	0.973245	0.949192	0.932728	0.114769
A0A1B0GVI7	Uncharacterized protein (Fragment) OS=Homo sapiens PE=4 SV=1 - [A0A1B0GVI7_HUMAN]	9.41	7	7	10	797	90.5235	6.46826	1.18508	1.02692	1.30194	1.17131	0.871918	1.06692	0.985849	0.974895	0.832312	0.114804
C9J3Q3	Protein FAM107B (Fragment) OS=Homo sapiens GN=FAM107B PE=1 SV=1 - [C9J3Q3_HUMAN]	19.8	2	2	4	101	12.1676	9.14404		0.928347	0.940922	0.934635		1.00466	0.968236	0.986449	1.05544	0.114932
Q9NPF4	Probable tRNA N6-adenosine threonylcarbamoyltransferase OS=Homo sapiens GN=OSGEP PE=1 SV=1 - [OSGEP_HUMAN]	20.9	5	5	15	335	36.4033	6.354	0.954784	0.992756	0.89728	0.948273	1.07954	0.973785	1.04201	1.03178	1.08806	0.114986
P40306	Proteasome subunit beta type-10 OS=Homo sapiens GN=PSMB10 PE=1 SV=1 - [PSB10_HUMAN]	9.89	3	3	5	273	28.9181	7.81104		0.918541	0.8169	0.86772		1.01525	1.12833	1.07179	1.23518	0.115274
P61011	Signal recognition particle 54 kDa protein OS=Homo sapiens GN=SRP54 PE=1 SV=1 - [SRP54_HUMAN]	37.1	16	16	44	504	55.6683	8.74854	0.981801	0.996157	0.990689	0.989549	1.00261	1.02435	0.997385	1.00811	1.01876	0.115352
A0A0S2Z470	Papillary renal cell carcinoma isoform 3 (Fragment) OS=Homo sapiens GN=PRCC PE=2 SV=1 - [A0A0S2Z470_HUMAN]	10.68	4	4	4	459	48.93	5.50342	0.972355		0.987063	0.979709	1.07671		1.02543	1.05107	1.07284	0.115911
Q96F87	Putative uncharacterized protein (Fragment) OS=Homo sapiens PE=2 SV=1 - [Q96F87_HUMAN]	12.14	4	9	22	857	94.3198	8.11865	0.970954	1.03047	1.05968	1.02037	0.937597	0.88705	0.993877	0.939508	0.920752	0.116019
D6RJC3	Type II inositol 3,4-bisphosphate 4-phosphatase (Fragment) OS=Homo sapiens GN=INPP4B PE=1 SV=1 - [D6RJC3_HUMAN]	13.1	9	9	14	817	92.0681	5.60498	1.04735	1.01662	1.03379	1.03259	0.927901	0.992576	1.01359	0.978022	0.947155	0.116031
P05556	Integrin beta-1 OS=Homo sapiens GN=ITGB1 PE=1 SV=2 - [ITB1_HUMAN]	22.06	16	16	79	798	88.357	5.38916	1.00331	1.0865	1.10367	1.06449	1.04551	0.908485	0.871886	0.94196	0.884891	0.116082
P18615	Negative elongation factor E OS=Homo sapiens GN=NELFE PE=1 SV=3 - [NELFE_HUMAN]	15.79	4	4	8	380	43.2137	9.33447	1.1023	1.09969	0.985724	1.06257	0.944759	0.987777	1.00232	0.978287	0.920679	0.11609
Q92665	28S ribosomal protein S31, mitochondrial OS=Homo sapiens GN=MRPS31 PE=1 SV=3 - [RT31_HUMAN]	22.28	8	8	28	395	45.2905	9.29053	1.00993	1.00946	0.957622	0.992337	1.05347	1.03211	1.17147	1.08569	1.09407	0.116155
P16435	NADPH--cytochrome P450 reductase OS=Homo sapiens GN=POR PE=1 SV=2 - [NCPR_HUMAN]	23.78	14	14	29	677	76.6413	5.57959	0.998221	1.02061	1.05343	1.02409	0.97492	1.0018	0.988719	0.988479	0.965228	0.116224
E7ESY4	Metastasis-associated protein MTA1 OS=Homo sapiens GN=MTA1 PE=1 SV=1 - [E7ESY4_HUMAN]	15.79	7	11	22	703	79.3235	9.11475	0.993428	1.03839	1.05282	1.02821	1.00881	0.931836	0.972854	0.971166	0.944519	0.116227
Q12913	Receptor-type tyrosine-protein phosphatase eta OS=Homo sapiens GN=PTPRJ PE=1 SV=3 - [PTPRJ_HUMAN]	4.94	5	5	12	1337	145.851	5.57959	1.00077	1.02389	1.1674	1.06402	1.014	0.869725	0.900044	0.927923	0.872092	0.116534
Q5T5P2	Sickle tail protein homolog OS=Homo sapiens GN=KIAA1217 PE=1 SV=2 - [SKT_HUMAN]	6.02	10	10	22	1943	213.983	7.06396	1.09003	1.02334	1.02679	1.04672	0.862411	1.00838	0.975125	0.948638	0.906297	0.11699
Q9BQG0	Myb-binding protein 1A OS=Homo sapiens GN=MYBBP1A PE=1 SV=2 - [MBB1A_HUMAN]	25.15	28	28	89	1328	148.762	9.27588	1.11985	1.20156	0.97506	1.09882	0.796916	0.668533	1.0512	0.838883	0.763438	0.117189
B5BUD5	Protein phosphatase 1A isoform 1 (Fragment) OS=Homo sapiens GN=PPM1A PE=2 SV=1 - [B5BUD5_HUMAN]	31.15	8	9	25	382	42.4507	5.36377	1.00121	0.963496	0.972321	0.979009	1.06556	1.0225	0.992614	1.02689	1.04891	0.117226
B7Z2X0	cDNA FLJ60543, highly similar to Active breakpoint cluster region-related protein OS=Homo sapiens PE=2 SV=1 - [B7Z2X0_HUMAN]	22.76	14	15	28	769	88.0188	7.57666	0.9641	1.06073	1.00375	1.00953	0.928316	0.902639	0.981115	0.937356	0.928511	0.117943
E9PS17	N-terminal kinase-like protein OS=Homo sapiens GN=SCYL1 PE=1 SV=1 - [E9PS17_HUMAN]	18.06	10	10	16	775	85.6649	5.66846	0.996735	1.00186	1.00746	1.00202	1.00231	0.877177	0.882517	0.920669	0.918816	0.118038
A8K4U4	cDNA FLJ77113 OS=Homo sapiens PE=2 SV=1 - [A8K4U4_HUMAN]	2.51	1	1	2	837	95.5428	6.29053		1.03742	0.96052	0.99897		0.896972	0.828142	0.862557	0.863447	0.118245
Q9Y2U5	Mitogen-activated protein kinase kinase kinase 2 OS=Homo sapiens GN=MAP3K2 PE=1 SV=2 - [M3K2_HUMAN]	4.85	3	3	5	619	69.6972	8.00146	0.915821	0.966089	0.870904	0.917605	1.09898	1.06694	0.932018	1.03264	1.12537	0.118685
B3KMF8	cDNA FLJ10869 fis, clone NT2RP4001677 OS=Homo sapiens PE=2 SV=1 - [B3KMF8_HUMAN]	21.78	2	2	2	101	10.2683	7.23975	1.00805		0.973858	0.990955	0.917911		0.840195	0.879053	0.887077	0.118816
Q8N995	cDNA FLJ38173 fis, clone FCBBF1000053, highly similar to HYDROXYMETHYLGLUTARYL-COA SYNTHASE, CYTOPLASMIC OS=Homo sapiens PE=2 SV=1 - [Q8N995_HUMAN]	41.26	18	19	105	509	56.2029	5.41455	1.00378	1.09717	1.42497	1.17531	1.00879	0.88497	0.652232	0.848664	0.722079	0.118892
Q9UJU6	Drebrin-like protein OS=Homo sapiens GN=DBNL PE=1 SV=1 - [DBNL_HUMAN]	35.12	3	14	48	430	48.1776	5.04639	1.01624	1.09616	1.00094	1.03778	0.843182	0.984571	0.967985	0.931913	0.897985	0.118977
C9JAB9	Cytoplasmic protein NCK1 (Fragment) OS=Homo sapiens GN=NCK1 PE=1 SV=1 - [C9JAB9_HUMAN]	10.92	2	2	2	174	20.056	7.43018	0.904339	0.990774		0.947557	1.12202	1.05724		1.08963	1.14994	0.119221
P30048	Thioredoxin-dependent peroxide reductase, mitochondrial OS=Homo sapiens GN=PRDX3 PE=1 SV=3 - [PRDX3_HUMAN]	39.45	7	7	30	256	27.6752	7.78174	1.00554	0.995119	0.939161	0.97994	1.07408	0.999275	1.04396	1.0391	1.06037	0.119417
P16157	Ankyrin-1 OS=Homo sapiens GN=ANK1 PE=1 SV=3 - [ANK1_HUMAN]	3.35	4	4	6	1881	206.137	6.01123	0.873481	0.957793	1.02285	0.951374	1.17086	1.00485	1.06386	1.07986	1.13505	0.119422
Q9UBI6	Guanine nucleotide-binding protein G(I)/G(S)/G(O) subunit gamma-12 OS=Homo sapiens GN=GNG12 PE=1 SV=3 - [GBG12_HUMAN]	56.94	3	3	11	72	8.00117	8.96826	0.94599	1.02072	0.93664	0.967784	0.989135	1.0639	1.10071	1.05125	1.08624	0.119435
Q96BK5	PIN2/TERF1-interacting telomerase inhibitor 1 OS=Homo sapiens GN=PINX1 PE=1 SV=2 - [PINX1_HUMAN]	16.16	4	4	6	328	37.012	9.59814	1.11277	1.00339	1.00848	1.04155	0.805872	1.01203	0.895175	0.904358	0.868284	0.119707
Q16576	Histone-binding protein RBBP7 OS=Homo sapiens GN=RBBP7 PE=1 SV=1 - [RBBP7_HUMAN]	34.82	8	14	52	425	47.7902	5.04639	1.0482	0.987448	1.0227	1.01945	0.961174	0.98651	0.860846	0.936177	0.918315	0.119836
Q53EU6	Glycerol-3-phosphate acyltransferase 3 OS=Homo sapiens GN=GPAT3 PE=1 SV=2 - [GPAT3_HUMAN]	11.98	4	4	6	434	48.6735	8.86572	0.97453	0.939898	0.891977	0.935468	0.982604	0.978406	0.987898	0.982969	1.05078	0.119928
B2R6N9	cDNA, FLJ93042, highly similar to Homo sapiens signal sequence receptor, alpha (translocon-associated protein alpha) (SSR1), mRNA OS=Homo sapiens PE=2 SV=1 - [B2R6N9_HUMAN]	20.98	4	4	16	286	32.1733	4.48779	0.979321	1.00653	0.87671	0.954186	1.10213	0.983948	1.12524	1.07044	1.12184	0.11996
B2R5M8	Isocitrate dehydrogenase [NADP] OS=Homo sapiens PE=2 SV=1 - [B2R5M8_HUMAN]	56.76	24	25	205	414	46.6195	7.00537	0.981257	0.993949	0.916398	0.963868	1.0158	0.9978	1.07296	1.02885	1.06742	0.120398
Q8IYS1	Peptidase M20 domain-containing protein 2 OS=Homo sapiens GN=PM20D2 PE=1 SV=2 - [P20D2_HUMAN]	7.57	3	3	5	436	47.746	5.84619	0.930192	1.01641	1.01445	0.987019	1.04729	1.05447	1.03161	1.04446	1.05819	0.120665
B4DVR4	cDNA FLJ60912, highly similar to Vinexin OS=Homo sapiens PE=2 SV=1 - [B4DVR4_HUMAN]	6.49	2	2	5	385	42.3031	8.98291	1.08555	1.08677	0.976256	1.04953	0.883214	0.984597	0.985937	0.951249	0.90636	0.120763
Q15005	Signal peptidase complex subunit 2 OS=Homo sapiens GN=SPCS2 PE=1 SV=3 - [SPCS2_HUMAN]	41.59	9	9	30	226	24.9867	8.47021	1.03637	1.00065	1.03043	1.02248	0.987734	1.00556	1.00161	0.998303	0.97635	0.12081
Q59G44	Calcium-transporting ATPase 2C1 isoform 1d variant (Fragment) OS=Homo sapiens PE=2 SV=1 - [Q59G44_HUMAN]	7.81	4	4	8	627	68.6407	8.08936	1.03823	1.11356	1.17937	1.11039	1.05462	1.01705	0.911889	0.99452	0.895652	0.12126
B4DNN4	Ribonucleoside-diphosphate reductase OS=Homo sapiens PE=2 SV=1 - [B4DNN4_HUMAN]	25.98	17	17	45	762	86.3966	6.65381	1.02905	1.02037	1.13357	1.061	0.965218	1.01898	0.88368	0.955959	0.900999	0.121454
Q9Y2S6	Translation machinery-associated protein 7 OS=Homo sapiens GN=TMA7 PE=1 SV=1 - [TMA7_HUMAN]	34.38	2	3	20	64	7.06193	9.99365	1.04833	1.05673	0.958216	1.02109	0.878681	0.991247	0.926602	0.932177	0.912921	0.12155
Q9UBN6	Tumor necrosis factor receptor superfamily member 10D OS=Homo sapiens GN=TNFRSF10D PE=1 SV=1 - [TR10D_HUMAN]	5.18	2	2	2	386	41.7968	6.53662	0.904883		0.748694	0.826788	1.03443		1.02558	1.03001	1.24579	0.121694
B7Z7U2	cDNA FLJ50916, highly similar to Rho guanine nucleotide exchange factor 11 OS=Homo sapiens PE=2 SV=1 - [B7Z7U2_HUMAN]	2.24	2	2	2	938	103.546	5.35107	0.981953		0.920348	0.95115	1.06677		1.02652	1.04664	1.1004	0.121899
Q8NCW5	NAD(P)H-hydrate epimerase OS=Homo sapiens GN=NAXE PE=1 SV=2 - [NNRE_HUMAN]	31.94	7	7	37	288	31.6542	7.66455	0.970026	1.01028	1.04	1.00677	1.07913	1.03255	1.05164	1.05444	1.04736	0.122055
Q96SB4	SRSF protein kinase 1 OS=Homo sapiens GN=SRPK1 PE=1 SV=2 - [SRPK1_HUMAN]	15.88	9	10	24	655	74.2784	6.16357	0.989135	0.960996	1.06371	1.00462	0.953342	0.939404	0.939238	0.943995	0.939658	0.122184
A8K7A1	cDNA FLJ77346, highly similar to Homo sapiens DEAD (Asp-Glu-Ala-Asp) box polypeptide 49 (DDX49), mRNA OS=Homo sapiens PE=2 SV=1 - [A8K7A1_HUMAN]	7.04	2	3	7	483	54.25	8.98291	1.01041	1.15665	1.13337	1.10015	0.958394	0.89285	1.05969	0.970312	0.881985	0.122342
B2R6N3	cDNA, FLJ93032, highly similar to Homo sapiens zinc finger, A20 domain containing 3 (ZA20D3), mRNA OS=Homo sapiens PE=2 SV=1 - [B2R6N3_HUMAN]	4.33	1	1	3	208	22.5367	7.1958	1.01098	1.00167	1.15168	1.05478	1.00206	0.874809	0.699036	0.858637	0.814045	0.122345
Q96LR5	Ubiquitin-conjugating enzyme E2 E2 OS=Homo sapiens GN=UBE2E2 PE=1 SV=1 - [UB2E2_HUMAN]	18.41	2	3	6	201	22.2411	7.7085	1.07269	1.12931	0.897997	1.03333	0.973859	0.653026	0.7928	0.806562	0.780544	0.12242
B3KMS0	Condensin complex subunit 1 OS=Homo sapiens PE=2 SV=1 - [B3KMS0_HUMAN]	24.48	26	26	67	1401	157.096	6.60986	1.0073	1.06101	1.08356	1.05062	0.976759	1.02002	1.0034	1.00006	0.951873	0.122522
P18085	ADP-ribosylation factor 4 OS=Homo sapiens GN=ARF4 PE=1 SV=3 - [ARF4_HUMAN]	56.11	6	9	80	180	20.4977	7.13721	0.935536	0.970584	1.03259	0.97957	1.03561	1.03329	1.14999	1.07297	1.09534	0.122656
P60602	Reactive oxygen species modulator 1 OS=Homo sapiens GN=ROMO1 PE=1 SV=1 - [ROMO1_HUMAN]	21.52	1	1	3	79	8.17686	9.33447	1.08236	0.987092	1.16411	1.07785	0.956847	1.01709	0.872851	0.948928	0.880388	0.12278
P08621	U1 small nuclear ribonucleoprotein 70 kDa OS=Homo sapiens GN=SNRNP70 PE=1 SV=2 - [RU17_HUMAN]	25.63	14	14	44	437	51.5258	9.93506	0.994977	0.974663	0.954808	0.974816	0.978728	1.05685	1.05013	1.02857	1.05514	0.122845
A0A075B746	28S ribosomal protein S21, mitochondrial OS=Homo sapiens GN=MRPS21 PE=1 SV=1 - [A0A075B746_HUMAN]	29.89	2	2	4	87	10.6814	9.92041	1.02015	1.00378		1.01196	0.969252	0.988808		0.97903	0.967455	0.122854
Q8WUA4	General transcription factor 3C polypeptide 2 OS=Homo sapiens GN=GTF3C2 PE=1 SV=2 - [TF3C2_HUMAN]	6.04	4	5	12	911	100.616	7.31299	1.06586	1.06305	1.1262	1.08504	0.972339	0.97107	1.07574	1.00638	0.927513	0.122987
Q8N954	G patch domain-containing protein 11 OS=Homo sapiens GN=GPATCH11 PE=1 SV=3 - [GPT11_HUMAN]	10.04	3	3	4	259	30.18	5.23682	0.994059	0.882869	0.937087	0.938005	0.979237	1.13304	1.02702	1.04643	1.11559	0.123148
B3KN68	cDNA FLJ13801 fis, clone THYRO1000173, highly similar to AP-1 complex subunit mu-2 OS=Homo sapiens PE=2 SV=1 - [B3KN68_HUMAN]	32.15	11	14	33	423	48.0361	8.22119	1.00275	0.966752	1.01647	0.995325	1.01889	1.02949	1.08415	1.04418	1.04908	0.123155
Q9NV31	U3 small nucleolar ribonucleoprotein protein IMP3 OS=Homo sapiens GN=IMP3 PE=1 SV=1 - [IMP3_HUMAN]	34.78	5	5	13	184	21.8366	9.49561	1.10295	1.19956	1.05674	1.11975	0.784956	0.792925	1.10979	0.89589	0.80008	0.123321
Q658X7	Putative uncharacterized protein DKFZp666D0110 OS=Homo sapiens GN=DKFZp666D0110 PE=2 SV=1 - [Q658X7_HUMAN]	4.33	1	1	2	231	23.7513	7.73779		1.02794	1.04911	1.03853		0.957289	0.857886	0.907587	0.873919	0.123359
Q9Y244	Proteasome maturation protein OS=Homo sapiens GN=POMP PE=1 SV=1 - [POMP_HUMAN]	37.59	4	4	9	141	15.7791	5.10986	1.0287	0.947635	0.900089	0.958808	0.869643	0.907218	0.867881	0.88158	0.919454	0.123462
Q14427	GM2-activator protein (Fragment) OS=Homo sapiens PE=2 SV=1 - [Q14427_HUMAN]	7.77	1	1	2	103	11.1297	4.75439		1.01513	1.05556	1.03534		0.943087	0.837604	0.890346	0.859952	0.124115
B4DGN8	cDNA FLJ53377, highly similar to Procollagen-lysine, 2-oxoglutarate 5-dioxygenase 1 (EC 1.14.11.4) OS=Homo sapiens PE=2 SV=1 - [B4DGN8_HUMAN]	22.75	12	13	25	690	79.3492	7.02002	0.982914	1.22396	1.5698	1.25889	1.04191	0.890699	0.643465	0.85869	0.6821	0.124175
A8K787	cDNA FLJ75273, highly similar to Homo sapiens solute carrier family 25 (mitochondrial carrier; adenine nucleotide translocator), member 4, mRNA OS=Homo sapiens PE=2 SV=1 - [A8K787_HUMAN]	42.28	3	13	120	298	33.0592	9.75928	0.927455	0.976552	1.03638	0.98013	1.07281	1.0143	1.06587	1.05099	1.0723	0.124194
P20290	Transcription factor BTF3 OS=Homo sapiens GN=BTF3 PE=1 SV=1 - [BTF3_HUMAN]	45.15	6	8	29	206	22.1544	9.37842	1.13795	1.01592	0.892039	1.0153	0.795395	0.837207	0.93494	0.855847	0.842947	0.124237
S4R456	40S ribosomal protein S15 (Fragment) OS=Homo sapiens GN=RPS15 PE=1 SV=1 - [S4R456_HUMAN]	57.35	4	4	19	68	8.02147	11.4731	1.13935	1.09237	0.969613	1.06711	0.831396	0.819855	1.03997	0.897073	0.840656	0.124271
A0A087WXM6	60S ribosomal protein L17 (Fragment) OS=Homo sapiens GN=RPL17 PE=3 SV=1 - [A0A087WXM6_HUMAN]	44.38	7	8	82	169	19.5732	10.0376	1.07679	1.11494	1.03954	1.07709	0.907506	0.855779	1.07052	0.944601	0.876995	0.124281
Q9BVJ8	HEXA protein (Fragment) OS=Homo sapiens GN=HEXA PE=2 SV=2 - [Q9BVJ8_HUMAN]	24.69	10	11	31	409	47.0644	4.99561	0.963404	1.00055	1.018	0.993987	1.06064	1.00803	1.04327	1.03731	1.04359	0.124383
O14578	Citron Rho-interacting kinase OS=Homo sapiens GN=CIT PE=1 SV=2 - [CTRO_HUMAN]	8.34	15	15	29	2027	231.286	6.56592	0.984306	1.07895	1.1446	1.06928	1.02779	0.929142	0.890786	0.949239	0.887734	0.1244
Q6XYC5	LP6054 OS=Homo sapiens GN=RP3-402G11.12 PE=2 SV=1 - [Q6XYC5_HUMAN]	19.52	5	5	8	292	33.16	5.97314	1.00316	1.01364	1.15133	1.05604	1.01678	0.886201	0.780884	0.894622	0.847144	0.124587
P31942	Heterogeneous nuclear ribonucleoprotein H3 OS=Homo sapiens GN=HNRNPH3 PE=1 SV=2 - [HNRH3_HUMAN]	26.3	6	7	52	346	36.9031	6.87354	1.0064	0.996877	0.888253	0.963843	1.01086	1.0476	1.10981	1.05609	1.09571	0.124926
B4DEI4	cDNA FLJ54595, highly similar to Golgi reassembly-stacking protein 2 OS=Homo sapiens PE=2 SV=1 - [B4DEI4_HUMAN]	25.68	9	9	30	405	42.0186	5.07178	1.01942	0.966042	0.891363	0.958941	0.995893	1.05966	1.09399	1.04985	1.0948	0.12496
V9HWK1	Triosephosphate isomerase OS=Homo sapiens GN=HEL-S-49 PE=2 SV=1 - [V9HWK1_HUMAN]	69.08	17	17	319	249	26.6527	6.90283	0.932809	1.00144	1.01352	0.982592	1.10533	1.01392	1.04269	1.05398	1.07265	0.124978
P10586	Receptor-type tyrosine-protein phosphatase F OS=Homo sapiens GN=PTPRF PE=1 SV=2 - [PTPRF_HUMAN]	10.96	16	16	28	1907	212.744	6.30322	0.950508	1.04878	1.06479	1.02136	1.00063	0.845415	0.870389	0.905477	0.886542	0.125295
P60891	Ribose-phosphate pyrophosphokinase 1 OS=Homo sapiens GN=PRPS1 PE=1 SV=2 - [PRPS1_HUMAN]	44.97	5	11	40	318	34.8119	6.97607	0.989973	0.960371	0.899745	0.95003	0.985929	1.01449	1.09772	1.03271	1.08703	0.12538
Q9Y5B6	PAX3- and PAX7-binding protein 1 OS=Homo sapiens GN=PAXBP1 PE=1 SV=2 - [PAXB1_HUMAN]	3.05	3	3	3	917	104.739	5.68115	0.87521		0.954473	0.914841	1.16555		1.04093	1.10324	1.20594	0.125383
P36957	Dihydrolipoyllysine-residue succinyltransferase component of 2-oxoglutarate dehydrogenase complex, mitochondrial OS=Homo sapiens GN=DLST PE=1 SV=4 - [ODO2_HUMAN]	21.63	9	9	41	453	48.7245	8.95361	1.00513	0.965679	0.936764	0.96919	0.97892	1.07037	1.06458	1.03796	1.07095	0.125499
Q9Y6M5	Zinc transporter 1 OS=Homo sapiens GN=SLC30A1 PE=1 SV=3 - [ZNT1_HUMAN]	6.9	2	2	6	507	55.2641	6.48096	0.947878	1.03675	0.901505	0.962045	1.15308	0.981812	1.15909	1.09799	1.14131	0.125545
B2R6K1	cDNA, FLJ92992, highly similar to Homo sapiens methylmalonyl Coenzyme A mutase (MUT), nuclear gene encoding mitochondrial protein, mRNA OS=Homo sapiens PE=2 SV=1 - [B2R6K1_HUMAN]	12.4	8	8	17	750	82.9797	7.06396	1.00866	1.03762	1.15137	1.06589	1.02418	0.94023	0.922296	0.962235	0.902756	0.125746
Q9BXW9	Fanconi anemia group D2 protein OS=Homo sapiens GN=FANCD2 PE=1 SV=2 - [FACD2_HUMAN]	3.45	5	5	8	1451	164.025	5.88428	1.00405	1.08075	1.0964	1.0604	1.01903	1.00559	0.97493	0.99985	0.942898	0.125838
A4D1E1	Zinc finger protein 804B OS=Homo sapiens GN=ZNF804B PE=2 SV=2 - [Z804B_HUMAN]	2.67	2	3	6	1349	152.477	8.54346		0.961292	0.886353	0.923823		1.01526	1.02462	1.01994	1.10404	0.125856
B3KVY9	cDNA FLJ41755 fis, clone HSYRA2009102, highly similar to Adenosine 3'-phospho 5'-phosphosulfate transporter 1 OS=Homo sapiens PE=2 SV=1 - [B3KVY9_HUMAN]	14.81	6	6	20	412	45.0423	8.98291	0.981164	0.998399	0.97029	0.983284	1.01955	1.02671	0.987668	1.01131	1.0285	0.125887
A0A024R637	TBC1 domain family, member 4, isoform CRA_b OS=Homo sapiens GN=TBC1D4 PE=4 SV=1 - [A0A024R637_HUMAN]	1.23	1	1	3	1298	146.457	7.00537	0.996595	1.04764	1.15421	1.06615	1.01385	0.930868	0.790311	0.911677	0.855112	0.125951
P09001	39S ribosomal protein L3, mitochondrial OS=Homo sapiens GN=MRPL3 PE=1 SV=1 - [RM03_HUMAN]	25.29	7	7	12	348	38.6081	9.48096	1.06442	1.01682	1.10082	1.06068	1.00181	1.03082	0.939425	0.990683	0.934004	0.126127
B2R791	cDNA, FLJ93335, highly similar to Homo sapiens PRP3 pre-mRNA processing factor 3 homolog (yeast) (PRPF3), mRNA OS=Homo sapiens PE=2 SV=1 - [B2R791_HUMAN]	15.08	9	9	13	683	77.495	9.49561	1.00761	1.10286	1.03152	1.04733	1.00214	0.987716	0.890553	0.960138	0.916748	0.12619
B3KML1	cDNA FLJ11308 fis, clone PLACE1010074, highly similar to Sorting nexin-2 OS=Homo sapiens PE=2 SV=1 - [B3KML1_HUMAN]	32.56	13	15	48	519	58.4356	5.05908	0.982875	0.951822	1.01794	0.984211	1.02034	1.03724	1.01296	1.02351	1.03993	0.126358
P68402	Platelet-activating factor acetylhydrolase IB subunit beta OS=Homo sapiens GN=PAFAH1B2 PE=1 SV=1 - [PA1B2_HUMAN]	12.66	4	4	22	229	25.5531	5.92236	0.89775	1.00831	0.946932	0.950998	1.13872	0.974835	1.07019	1.06125	1.11593	0.126581
D3DSR2	Polymerase (RNA) III (DNA directed) polypeptide D, 44kDa, isoform CRA_a OS=Homo sapiens GN=POLR3D PE=4 SV=1 - [D3DSR2_HUMAN]	13.78	3	3	4	283	31.7445	5.2876		1.0613	1.11043	1.08586		1.01682	0.955335	0.986078	0.908105	0.126646
Q7RTP6	Protein-methionine sulfoxide oxidase MICAL3 OS=Homo sapiens GN=MICAL3 PE=1 SV=2 - [MICA3_HUMAN]	1.15	2	2	3	2002	224.156	5.5542	1.00816	1.05488		1.03152	0.920663	0.970105		0.945384	0.916495	0.126912
B4E1Y2	cDNA FLJ61049, highly similar to Homo sapiens RAN binding protein 10 (RANBP10), mRNA OS=Homo sapiens PE=2 SV=1 - [B4E1Y2_HUMAN]	8.68	2	2	3	311	33.7113	7.72314	1.08174	1.07263	0.925941	1.02677	0.917899	0.964119	0.83752	0.906513	0.882879	0.12704
B2RDU2	cDNA, FLJ96768, Homo sapiens non-SMC (structural maintenance of chromosomes)element 1 protein (NSE1), mRNA OS=Homo sapiens PE=2 SV=1 - [B2RDU2_HUMAN]	12.89	3	3	4	256	29.7051	7.02002	1.05546		1.03741	1.04644	0.894231		0.9793	0.936766	0.895196	0.127754
E5RFP0	NudC domain-containing protein 2 OS=Homo sapiens GN=NUDCD2 PE=1 SV=1 - [E5RFP0_HUMAN]	29.55	3	3	5	132	14.7362	4.67822	1.00708	0.706758	0.784817	0.832884	0.950118	1.19496	1.01924	1.05477	1.26641	0.12779
Q9NYU1	UDP-glucose:glycoprotein glucosyltransferase 2 OS=Homo sapiens GN=UGGT2 PE=1 SV=4 - [UGGG2_HUMAN]	4.68	4	7	13	1516	174.624	6.88818	1.01868		1.05094	1.03481	0.990889		0.99629	0.99359	0.960164	0.127905
P04424	Argininosuccinate lyase OS=Homo sapiens GN=ASL PE=1 SV=4 - [ARLY_HUMAN]	34.91	14	14	44	464	51.6253	6.48096	0.962575	1.00077	0.937896	0.967081	0.975036	1.05671	1.07614	1.03596	1.07122	0.128025
J3KN29	26S proteasome non-ATPase regulatory subunit 9 OS=Homo sapiens GN=PSMD9 PE=1 SV=1 - [J3KN29_HUMAN]	32.88	7	7	28	222	24.5384	6.72705	1.06523	1.0101	0.987005	1.02078	0.949911	0.959872	0.99646	0.968748	0.949029	0.128097
Q9C0I1	Myotubularin-related protein 12 OS=Homo sapiens GN=MTMR12 PE=1 SV=2 - [MTMRC_HUMAN]	10.31	6	6	7	747	86.0928	6.62451	1.00638	0.899007	0.736701	0.880695	1.00448	1.06789	1.03182	1.03473	1.1749	0.128257
B2R8G6	cDNA, FLJ93891, Homo sapiens FK506 binding protein 8, 38kDa (FKBP8), mRNA OS=Homo sapiens PE=2 SV=1 - [B2R8G6_HUMAN]	27.53	8	8	25	356	38.4711	7.69385	1.03396	1.03764	1.1197	1.06377	1.00702	1.01424	0.892201	0.971155	0.912939	0.128445
A0A0U1RQK7	Eukaryotic translation initiation factor 4 gamma 3 OS=Homo sapiens GN=EIF4G3 PE=1 SV=1 - [A0A0U1RQK7_HUMAN]	7.33	6	14	47	1774	195.152	5.61768	0.952675	1.017	1.06186	1.01051	0.963548	0.949734	0.925822	0.946368	0.936524	0.128449
Q59GN8	PTK2 protein tyrosine kinase 2 isoform b variant (Fragment) OS=Homo sapiens PE=2 SV=1 - [Q59GN8_HUMAN]	4.72	4	4	7	975	110.164	6.21436	1.05161	0.971549	1.03135	1.01817	0.940733	0.99455	0.952577	0.96262	0.945443	0.128464
Q9H477	Ribokinase OS=Homo sapiens GN=RBKS PE=1 SV=1 - [RBSK_HUMAN]	3.11	1	1	2	322	34.1213	5.04639		0.867274	0.87533	0.871302		1.02128	0.936107	0.978692	1.12325	0.128721
P62333	26S protease regulatory subunit 10B OS=Homo sapiens GN=PSMC6 PE=1 SV=1 - [PRS10_HUMAN]	42.42	15	15	59	389	44.1451	7.48877	0.988987	0.981308	0.951322	0.973872	0.996159	0.998765	1.05526	1.01673	1.044	0.128844
Q9HA77	Probable cysteine--tRNA ligase, mitochondrial OS=Homo sapiens GN=CARS2 PE=1 SV=1 - [SYCM_HUMAN]	5.5	3	3	3	564	62.1847	8.33838		1.03332	0.980055	1.00669		0.935929	0.87565	0.90579	0.899773	0.128885
E7EPN9	Protein PRRC2C OS=Homo sapiens GN=PRRC2C PE=1 SV=1 - [E7EPN9_HUMAN]	14.26	20	33	73	2819	308.589	9.0708	1.01371	1.00865	1.0861	1.03615	0.980614	1.00565	0.927038	0.971099	0.937215	0.129143
Q13242	Serine/arginine-rich splicing factor 9 OS=Homo sapiens GN=SRSF9 PE=1 SV=1 - [SRSF9_HUMAN]	42.99	10	10	42	221	25.5264	8.646	0.982359	0.962918	0.939649	0.961642	0.98867	1.01907	0.977424	0.995054	1.03474	0.129262
X6RM59	5'-nucleotidase OS=Homo sapiens GN=NT5C3A PE=1 SV=1 - [X6RM59_HUMAN]	42.3	12	12	46	331	37.3815	6.87354	1.00358	0.92859	0.952728	0.961633	0.977143	1.07783	1.04006	1.03168	1.07284	0.129371
P51149	Ras-related protein Rab-7a OS=Homo sapiens GN=RAB7A PE=1 SV=1 - [RAB7A_HUMAN]	76.33	14	14	87	207	23.4748	6.69775	0.981817	1.00874	0.996559	0.995706	1.00055	1.02782	1.02576	1.01804	1.02243	0.129509
Q05DA4	P4HA2 protein OS=Homo sapiens GN=P4HA2 PE=2 SV=1 - [Q05DA4_HUMAN]	4.37	2	2	2	504	57.3419	5.63037		1.06272	1.26787	1.1653		0.920833	0.761162	0.840997	0.721703	0.130034
B2RMQ4	Cytoskeleton associated protein 2 OS=Homo sapiens GN=CKAP2 PE=2 SV=1 - [B2RMQ4_HUMAN]	4.4	2	2	4	682	76.8379	9.40771	0.849386	0.988793		0.91909	1.2542	1.10086		1.17753	1.28119	0.130112
B2RD36	cDNA, FLJ96437 OS=Homo sapiens PE=2 SV=1 - [B2RD36_HUMAN]	46.94	12	12	53	245	28.0401	6.78564	0.934744	0.950491	1.04902	0.978085	1.15169	1.0988	1.00376	1.08475	1.10906	0.130237
P60953	Cell division control protein 42 homolog OS=Homo sapiens GN=CDC42 PE=1 SV=2 - [CDC42_HUMAN]	41.36	6	7	96	191	21.245	6.55127	1.02756	1.06457	1.04724	1.04646	0.961499	1.01422	1.03041	1.00204	0.95756	0.130438
Q14151	Scaffold attachment factor B2 OS=Homo sapiens GN=SAFB2 PE=1 SV=1 - [SAFB2_HUMAN]	19.31	7	18	51	953	107.408	6.16357	1.06829	0.975259	0.966353	1.0033	0.91476	0.955848	0.941425	0.937344	0.934261	0.130513
Q9UNF0	Protein kinase C and casein kinase substrate in neurons protein 2 OS=Homo sapiens GN=PACSIN2 PE=1 SV=2 - [PACN2_HUMAN]	23.25	11	11	41	486	55.7039	5.19873	0.998033	0.995472	0.909559	0.967688	1.00798	1.02256	1.05917	1.0299	1.06429	0.1309
Q13404	Ubiquitin-conjugating enzyme E2 variant 1 OS=Homo sapiens GN=UBE2V1 PE=1 SV=2 - [UB2V1_HUMAN]	28.57	1	5	23	147	16.4843	7.92822	0.892763	0.802799	0.941976	0.879179	1.13788	1.07972	0.895486	1.0377	1.1803	0.131009
Q96EL3	39S ribosomal protein L53, mitochondrial OS=Homo sapiens GN=MRPL53 PE=1 SV=1 - [RM53_HUMAN]	62.5	6	6	18	112	12.0992	8.76318	1.10618	1.05456	1.0133	1.05801	0.887272	0.971169	1.03221	0.963549	0.910719	0.131116
B4DMX4	cDNA FLJ57154, highly similar to Alpha-fetoprotein OS=Homo sapiens PE=2 SV=1 - [B4DMX4_HUMAN]	1.55	1	1	5	451	50.7233	6.7124	0.789529	0.732185	0.613906	0.711874	0.836412	0.771035	0.85659	0.821346	1.15378	0.131118
F8W1F5	Formin-like protein 3 OS=Homo sapiens GN=FMNL3 PE=1 SV=1 - [F8W1F5_HUMAN]	5.16	1	5	10	1027	117.01	6.72705		0.906929	1.09958	1.00325		0.758996	0.768872	0.763934	0.761456	0.131208
O75116	Rho-associated protein kinase 2 OS=Homo sapiens GN=ROCK2 PE=1 SV=4 - [ROCK2_HUMAN]	25.58	33	35	82	1388	160.799	6.02393	0.991733	0.973089	1.01476	0.993194	0.985836	0.946974	0.944443	0.959084	0.965657	0.131292
B4DZZ0	cDNA FLJ52128, highly similar to PRA1 family protein 3 OS=Homo sapiens PE=2 SV=1 - [B4DZZ0_HUMAN]	15.15	3	3	10	165	19.1931	9.77393	0.925871	0.995672	0.960873	0.960805	1.09958	1.04772	0.97293	1.04008	1.08251	0.131595
P62750	60S ribosomal protein L23a OS=Homo sapiens GN=RPL23A PE=1 SV=1 - [RL23A_HUMAN]	43.59	11	11	75	156	17.6841	10.4478	1.12535	1.0493	0.954937	1.0432	0.78092	0.880794	1.00543	0.889049	0.852234	0.131639
Q96HS5	CYTH3 protein OS=Homo sapiens GN=CYTH3 PE=2 SV=1 - [Q96HS5_HUMAN]	13.97	2	2	3	179	21.0077	7.85498		1.01736	1.13684	1.0771		0.941405	0.877152	0.909278	0.844192	0.131813
P62834	Ras-related protein Rap-1A OS=Homo sapiens GN=RAP1A PE=1 SV=1 - [RAP1A_HUMAN]	42.39	2	7	42	184	20.9737	6.66846	0.949749		1.01381	0.981778	1.06275		1.05948	1.06111	1.08081	0.131851
P16401	Histone H1.5 OS=Homo sapiens GN=HIST1H1B PE=1 SV=3 - [H15_HUMAN]	50	12	16	180	226	22.5665	10.9165	1.06293	1.05018	0.975504	1.02954	0.905558	0.964079	0.999727	0.956455	0.929011	0.131913
A0A0C4DGE4	Syntaxin-3 (Fragment) OS=Homo sapiens GN=STX3 PE=1 SV=1 - [A0A0C4DGE4_HUMAN]	6.86	1	1	2	204	23.2285	6.43018	1.01263		1.04734	1.02998	1.08963		1.15647	1.12305	1.09036	0.132028
P09327	Villin-1 OS=Homo sapiens GN=VIL1 PE=1 SV=4 - [VILI_HUMAN]	40.27	30	30	86	827	92.6367	6.39209	1.01455	1.0824	1.12003	1.07233	1.00325	1.03727	0.97118	1.0039	0.936191	0.132412
F8W038	Chromatin complexes subunit BAP18 OS=Homo sapiens GN=C17orf49 PE=1 SV=1 - [F8W038_HUMAN]	21.66	2	2	7	157	16.2795	8.76318	0.953424	0.889239	0.926339	0.923	1.06293	0.963653	0.960042	0.99554	1.07859	0.132655
F2Z329	Transmembrane protein 237 OS=Homo sapiens GN=TMEM237 PE=1 SV=1 - [F2Z329_HUMAN]	17.71	1	1	2	96	10.5827	10.4624		1.03094	0.976709	1.00382		0.942412	0.911631	0.927021	0.92349	0.132757
Q14690	Protein RRP5 homolog OS=Homo sapiens GN=PDCD11 PE=1 SV=3 - [RRP5_HUMAN]	14.75	25	25	57	1871	208.57	8.86572	1.04335	1.30372	1.02096	1.12268	0.91903	0.687651	1.01273	0.873137	0.777726	0.132873
Q8NBJ4	Golgi membrane protein 1 OS=Homo sapiens GN=GOLM1 PE=1 SV=1 - [GOLM1_HUMAN]	12.47	5	5	7	401	45.3058	4.97021		1.00927	1.01156	1.01042		0.984964	0.950246	0.967605	0.957629	0.132969
A0A024RDV5	Fibronectin type III domain containing 3A, isoform CRA_b OS=Homo sapiens GN=FNDC3A PE=4 SV=1 - [A0A024RDV5_HUMAN]	6.65	7	7	14	1142	125.741	7.07861	0.91012	0.979063	0.994979	0.961387	1.038	1.0987	0.984612	1.04044	1.08222	0.132984
Q9UBB4	Ataxin-10 OS=Homo sapiens GN=ATXN10 PE=1 SV=1 - [ATX10_HUMAN]	38.32	15	15	47	475	53.4548	5.24951	1.08525	1.03647	1.00794	1.04322	0.818161	0.951028	1.01259	0.927261	0.888845	0.133154
F2Z2E2	Ras GTPase-activating-like protein IQGAP3 OS=Homo sapiens GN=IQGAP3 PE=1 SV=1 - [F2Z2E2_HUMAN]	7.56	7	11	16	1588	179.372	7.66455	0.976813	1.13596	1.00672	1.03983	0.864271	0.912255	0.994261	0.923596	0.888219	0.133372
I3L3E4	Charged multivesicular body protein 6 (Fragment) OS=Homo sapiens GN=CHMP6 PE=1 SV=1 - [I3L3E4_HUMAN]	11.5	1	1	2	113	12.9314	4.14502	1.05721	1.02712		1.04217	0.847457	0.957278		0.902367	0.865857	0.133449
Q49A26	Putative oxidoreductase GLYR1 OS=Homo sapiens GN=GLYR1 PE=1 SV=3 - [GLYR1_HUMAN]	5.79	3	3	7	553	60.518	9.17334	0.98615	0.90467	1.00447	0.965097	1.11358	1.11393	0.977184	1.06823	1.10686	0.13346
P14406	Cytochrome c oxidase subunit 7A2, mitochondrial OS=Homo sapiens GN=COX7A2 PE=1 SV=1 - [CX7A2_HUMAN]	27.71	2	2	19	83	9.39011	9.75928	0.984237	0.898475	0.845254	0.909322	0.954511	1.02875	1.00392	0.995725	1.09502	0.133481
Q49B96	Cytochrome c oxidase assembly protein COX19 OS=Homo sapiens GN=COX19 PE=1 SV=1 - [COX19_HUMAN]	10	1	1	2	90	10.3871	8.71924		0.99885	0.926647	0.962748		1.05262	1.05017	1.0514	1.09208	0.133566
D3DP46	Signal peptidase complex subunit 3 homolog (S. cerevisiae), isoform CRA_a OS=Homo sapiens GN=SPCS3 PE=4 SV=1 - [D3DP46_HUMAN]	17.78	3	3	12	180	20.2996	8.96826	0.995326	1.02638	1.11473	1.04548	0.924205	0.986539	0.990676	0.96714	0.925067	0.133709
A8K4W0	40S ribosomal protein S3a OS=Homo sapiens GN=RPS3A PE=2 SV=1 - [A8K4W0_HUMAN]	60.98	19	19	170	264	29.9358	9.72998	1.076	1.08572	0.973457	1.04506	0.844256	0.903651	1.0255	0.924468	0.884607	0.134009
P04040	Catalase OS=Homo sapiens GN=CAT PE=1 SV=3 - [CATA_HUMAN]	50.47	24	24	99	527	59.7188	7.38623	0.984594	1.00449	0.989086	0.992724	1.0447	0.993999	1.03121	1.0233	1.0308	0.13414
A0A0G2JNZ5	Glucosylceramidase OS=Homo sapiens GN=GBA PE=1 SV=1 - [A0A0G2JNZ5_HUMAN]	13.81	6	6	15	449	50.2316	7.02002	0.99446	0.956168	0.990438	0.980355	0.994004	1.0071	1.027	1.00937	1.02959	0.13415
Q969N2	GPI transamidase component PIG-T OS=Homo sapiens GN=PIGT PE=1 SV=1 - [PIGT_HUMAN]	8.65	5	5	9	578	65.6579	8.38232	1.01593	0.942848	0.951035	0.969938	0.993139	1.08498	1.03019	1.0361	1.06821	0.134152
B7Z591	Transmembrane and coiled-coil domains 1, isoform CRA_a OS=Homo sapiens GN=TMCO1 PE=2 SV=1 - [B7Z591_HUMAN]	22.16	4	4	11	176	19.8845	9.81787	0.999815	0.938798	0.920314	0.952976	1.01775	0.981313	1.10206	1.03371	1.08472	0.134183
Q8IX18	Probable ATP-dependent RNA helicase DHX40 OS=Homo sapiens GN=DHX40 PE=1 SV=2 - [DHX40_HUMAN]	10.65	7	7	14	779	88.5038	8.646	1.02878	1.04509	1.14892	1.07427	0.903881	1.04372	0.964521	0.970708	0.903602	0.134262
Q9BRA2	Thioredoxin domain-containing protein 17 OS=Homo sapiens GN=TXNDC17 PE=1 SV=1 - [TXD17_HUMAN]	38.21	4	4	20	123	13.9318	5.51611	0.852599	0.989077	0.955459	0.932378	1.22384	1.0219	1.00704	1.08426	1.16289	0.134342
Q9UBK9	Protein UXT OS=Homo sapiens GN=UXT PE=1 SV=1 - [UXT_HUMAN]	15.29	2	2	2	157	18.2346	7.59131	0.994195	1.02102		1.00761	0.974118	0.94561		0.959864	0.952618	0.134873
Q8NDZ4	Deleted in autism protein 1 OS=Homo sapiens GN=C3orf58 PE=1 SV=1 - [DIA1_HUMAN]	5.12	2	2	3	430	49.4505	8.52881	0.913272	0.992347		0.952809	1.05608	1.04396		1.05002	1.10203	0.135681
A0A0A0MS59	Helicase SRCAP OS=Homo sapiens GN=SRCAP PE=1 SV=1 - [A0A0A0MS59_HUMAN]	0.91	2	3	3	2971	315.42	5.66846		1.01726	1.10563	1.06145		1.18392	1.16081	1.17237	1.1045	0.135842
Q9UEL4	Putative uncharacterized protein (Fragment) OS=Homo sapiens PE=2 SV=1 - [Q9UEL4_HUMAN]	17.7	4	4	11	243	26.5346	8.49951	1.0172	1.0133	0.98681	1.00577	1.00042	0.967714	0.969301	0.979147	0.973528	0.13615
B4E312	cDNA FLJ53422, highly similar to TATA-binding protein-associated factor 2N OS=Homo sapiens PE=2 SV=1 - [B4E312_HUMAN]	39.24	7	9	71	395	40.0542	9.46631	0.969752	0.979786	0.984783	0.978107	1.0075	1.05351	0.986515	1.01584	1.03858	0.136187
Q1KMD3	Heterogeneous nuclear ribonucleoprotein U-like protein 2 OS=Homo sapiens GN=HNRNPUL2 PE=1 SV=1 - [HNRL2_HUMAN]	30.25	18	18	54	747	85.0522	4.90674	0.986619	0.993337	0.89552	0.958492	0.984753	1.04598	1.07414	1.03496	1.07978	0.136507
A0A087X243	Glutathione S-transferase P (Fragment) OS=Homo sapiens GN=GSTP1 PE=1 SV=1 - [A0A087X243_HUMAN]	42.03	1	2	105	69	7.44466	7.07861		0.956536	1.03822	0.997379		1.09853	1.09401	1.09627	1.09915	0.136832
B7Z6J7	cDNA FLJ61662, highly similar to CCR4-NOT transcription complex subunit 3 OS=Homo sapiens PE=2 SV=1 - [B7Z6J7_HUMAN]	7.8	5	5	9	718	76.5223	6.37939	0.949103	1.00503	0.992481	0.982206	1.04363	1.09639	0.994973	1.045	1.06393	0.137043
O15379	Histone deacetylase 3 OS=Homo sapiens GN=HDAC3 PE=1 SV=2 - [HDAC3_HUMAN]	10.75	4	4	7	428	48.8164	5.16064	1.05458	0.996533	1.01402	1.02171	1.01311	0.904179	0.9472	0.95483	0.934539	0.13708
Q8WUK0	Phosphatidylglycerophosphatase and protein-tyrosine phosphatase 1 OS=Homo sapiens GN=PTPMT1 PE=1 SV=1 - [PTPM1_HUMAN]	30.35	5	5	14	201	22.8291	9.77393	0.979266	0.973919	1.01411	0.989099	1.18248	1.12044	0.989205	1.09738	1.10947	0.137089
E5RIW3	Tubulin-specific chaperone A OS=Homo sapiens GN=TBCA PE=1 SV=1 - [E5RIW3_HUMAN]	75	9	9	28	84	10.074	4.62744	0.946423	0.924968	0.966108	0.945833	1.03136	1.02438	0.946597	1.00078	1.05809	0.137481
B3KX72	cDNA FLJ44920 fis, clone BRAMY3011501, highly similar to Heterogeneous nuclear ribonucleoprotein U OS=Homo sapiens PE=2 SV=1 - [B3KX72_HUMAN]	32.8	3	29	179	750	83.033	8.79248	1.0319	0.972302	0.853641	0.952613	1.03415	1.03461	1.14449	1.07108	1.12436	0.137665
Q5QP19	NFS1 nitrogen fixation 1 (S. cerevisiae), isoform CRA_b OS=Homo sapiens GN=NFS1 PE=2 SV=1 - [Q5QP19_HUMAN]	10.58	3	3	5	397	43.9894	7.10791	0.993077	1.01136	1.06804	1.02416	0.99183	0.965285	0.982761	0.979959	0.956842	0.137746
Q8NBT6	cDNA FLJ90758 fis, clone SKNMC1000082, highly similar to Mitochondrial deoxynucleotide carrier OS=Homo sapiens PE=2 SV=1 - [Q8NBT6_HUMAN]	8.75	3	3	8	320	35.4453	9.49561	0.85841	0.904344	1.07885	0.947203	1.13785	1.06319	1.04523	1.08209	1.14241	0.137898
P50502	Hsc70-interacting protein OS=Homo sapiens GN=ST13 PE=1 SV=2 - [F10A1_HUMAN]	39.02	15	15	78	369	41.3055	5.2749	0.991841	0.935953	0.966448	0.964747	0.990894	1.02499	0.989023	1.00163	1.03824	0.138016
Q15291	Retinoblastoma-binding protein 5 OS=Homo sapiens GN=RBBP5 PE=1 SV=2 - [RBBP5_HUMAN]	11.15	5	5	11	538	59.1157	5.09717	0.851649	1.06053	0.935727	0.949302	1.32437	1.08261	1.03814	1.14837	1.2097	0.138135
Q9BXP5	Serrate RNA effector molecule homolog OS=Homo sapiens GN=SRRT PE=1 SV=1 - [SRRT_HUMAN]	28.54	22	22	71	876	100.604	5.96045	1.03071	0.927056	0.96913	0.975632	1.00124	1.07179	1.0601	1.04437	1.07046	0.138177
H3BLU7	Aflatoxin B1 aldehyde reductase member 2 (Fragment) OS=Homo sapiens GN=AKR7A2 PE=1 SV=1 - [H3BLU7_HUMAN]	33.76	9	9	34	314	34.6622	7.18115	0.930326	1.02124	1.02847	0.993346	1.14479	1.04902	1.04086	1.07822	1.08544	0.138397
Q9BYG3	MKI67 FHA domain-interacting nucleolar phosphoprotein OS=Homo sapiens GN=NIFK PE=1 SV=1 - [MK67I_HUMAN]	35.49	11	11	33	293	34.201	9.87646	1.12355	1.21777	0.943579	1.09497	0.711931	0.727351	1.066	0.835093	0.762664	0.138632
P29034	Protein S100-A2 OS=Homo sapiens GN=S100A2 PE=1 SV=3 - [S10A2_HUMAN]	25.51	4	4	11	98	11.1094	4.77979	0.919606	0.83403	0.980989	0.911542	1.14907	1.1336	0.92168	1.06812	1.17177	0.138686
Q9BZE9	Tether containing UBX domain for GLUT4 OS=Homo sapiens GN=ASPSCR1 PE=1 SV=1 - [ASPC1_HUMAN]	12.12	4	4	7	553	60.1458	6.63916	1.1238	1.05417	0.995006	1.05766	0.892077	0.907042	1.04081	0.946644	0.895037	0.13881
Q9NV06	DDB1- and CUL4-associated factor 13 OS=Homo sapiens GN=DCAF13 PE=1 SV=2 - [DCA13_HUMAN]	24.27	8	8	12	445	51.3692	9.18799	1.15772	1.3697	0.956199	1.16121	0.825445	0.472151	1.04754	0.781712	0.67319	0.138832
Q86UX6	Serine/threonine-protein kinase 32C OS=Homo sapiens GN=STK32C PE=1 SV=1 - [ST32C_HUMAN]	9.88	3	3	6	486	54.9596	6.60986	1.07534	0.989677	0.949797	1.00494	0.807317	0.874547	0.983188	0.888351	0.883984	0.138929
P61619	Protein transport protein Sec61 subunit alpha isoform 1 OS=Homo sapiens GN=SEC61A1 PE=1 SV=2 - [S61A1_HUMAN]	7.77	4	4	8	476	52.2305	8.06006	0.980745	1.00813	0.969309	0.986061	0.940598	0.968175	0.968064	0.958946	0.972501	0.139358
E9PLK3	Puromycin-sensitive aminopeptidase OS=Homo sapiens GN=NPEPPS PE=1 SV=1 - [E9PLK3_HUMAN]	35.74	29	29	141	915	102.922	5.60498	0.962837	0.980895	1.01864	0.987457	1.04249	1.0197	1.00732	1.02317	1.03617	0.13944
P61962	DDB1- and CUL4-associated factor 7 OS=Homo sapiens GN=DCAF7 PE=1 SV=1 - [DCAF7_HUMAN]	14.62	4	4	9	342	38.9011	5.51611	0.991725	0.963159	1.02457	0.993151	0.970214	0.956776	0.948402	0.958464	0.965073	0.139488
Q16768	Glyceraldehyde 3-phosphate dehydrogenase (Fragment) OS=Homo sapiens GN=GAPD PE=2 SV=1 - [Q16768_HUMAN]	68.18	1	3	60	44	4.8913	5.08447		1.15815	1.03101	1.09458		0.938298	0.946537	0.942418	0.860985	0.139496
H0UIC2	HCG1794678 OS=Homo sapiens GN=hCG_1794678 PE=4 SV=1 - [H0UIC2_HUMAN]	1.11	1	1	2	1080	121.902	9.37842		1.15895	1.59943	1.37919		0.88803	0.55804	0.723035	0.524246	0.139907
E9PIB2	Gasdermin-D (Fragment) OS=Homo sapiens GN=GSDMD PE=1 SV=1 - [E9PIB2_HUMAN]	9.75	2	2	5	277	30.8057	9.0415	1.06833	1.10685	1.08039	1.08519	1.05335	0.940347	1.0491	1.01427	0.934643	0.140714
Q53SY7	Putative uncharacterized protein CAD (Fragment) OS=Homo sapiens GN=CAD PE=3 SV=1 - [Q53SY7_HUMAN]	25.66	44	44	166	2151	235.029	6.59521	0.997671	1.01785	1.05651	1.02401	0.961923	1.00631	0.985572	0.984602	0.961515	0.140794
Q7Z5L9	Interferon regulatory factor 2-binding protein 2 OS=Homo sapiens GN=IRF2BP2 PE=1 SV=2 - [I2BP2_HUMAN]	21.47	6	8	11	587	60.9867	8.68994	0.991939	1.02645	1.14986	1.05609	0.99387	0.969535	0.884875	0.949427	0.899006	0.140876
Q9UQD4	SH3-containing Grb-2-like 1 protein OS=Homo sapiens PE=4 SV=1 - [Q9UQD4_HUMAN]	30.31	9	9	19	353	39.8151	5.22412	1.07614	1.00705	0.986158	1.02312	0.846866	0.894404	1.01504	0.91877	0.89801	0.140914
B3KN06	Coronin OS=Homo sapiens PE=2 SV=1 - [B3KN06_HUMAN]	24.26	12	12	49	474	53.19	6.93213	0.997576	0.988476	0.928701	0.971584	0.989782	1.03471	1.03467	1.01972	1.04954	0.140976
P20618	Proteasome subunit beta type-1 OS=Homo sapiens GN=PSMB1 PE=1 SV=2 - [PSB1_HUMAN]	43.15	8	8	62	241	26.4724	8.1333	1.00754	0.974353	0.978981	0.986958	0.990527	1.0321	1.04445	1.02236	1.03587	0.141036
P62318	Small nuclear ribonucleoprotein Sm D3 OS=Homo sapiens GN=SNRPD3 PE=1 SV=1 - [SMD3_HUMAN]	47.62	4	4	61	126	13.9073	10.3159	0.984323	0.994365	1.0205	0.999728	0.999134	1.09149	1.13129	1.07397	1.07426	0.14145
B4DUC2	cDNA FLJ54483, highly similar to Serine/threonine-protein kinase tousled-like 2 (EC 2.7.11.1) OS=Homo sapiens PE=2 SV=1 - [B4DUC2_HUMAN]	6.27	2	4	4	718	82.3668	8.17725	0.87038	1.00448		0.93743	1.21625	1.0917		1.15397	1.231	0.141604
A0A024R394	Cysteine and histidine-rich domain (CHORD)-containing 1, isoform CRA_c OS=Homo sapiens GN=CHORDC1 PE=4 SV=1 - [A0A024R394_HUMAN]	48.19	15	15	92	332	37.5096	7.72314	0.965673	0.955062	1.01477	0.978501	1.02959	1.00886	1.00582	1.01476	1.03706	0.141756
I3L3P7	40S ribosomal protein S15a OS=Homo sapiens GN=RPS15A PE=1 SV=1 - [I3L3P7_HUMAN]	61	2	7	55	100	11.4702	10.1548	1.17824	1.17589	0.947932	1.10069	0.744921	0.821534	1.0635	0.876652	0.796458	0.141864
O75419	Cell division control protein 45 homolog OS=Homo sapiens GN=CDC45 PE=1 SV=1 - [CDC45_HUMAN]	9.54	5	5	7	566	65.5266	5.52881	1.10184	0.971121	1.05888	1.04395	0.776815	1.00898	0.920191	0.901995	0.864022	0.142148
Q9NV96	Cell cycle control protein 50A OS=Homo sapiens GN=TMEM30A PE=1 SV=1 - [CC50A_HUMAN]	14.96	5	5	15	361	40.6576	8.5874	1.06057	1.02552	1.03686	1.04098	0.840352	1.01104	0.979294	0.943561	0.906414	0.142265
Q8NFH4	Nucleoporin Nup37 OS=Homo sapiens GN=NUP37 PE=1 SV=1 - [NUP37_HUMAN]	24.54	6	6	12	326	36.684	5.92236	1.0085	1.06641	1.02618	1.0337	1.01026	0.991112	1.00121	1.00086	0.968234	0.142286
P61927	60S ribosomal protein L37 OS=Homo sapiens GN=RPL37 PE=1 SV=2 - [RL37_HUMAN]	28.87	4	4	12	97	11.0709	11.7368	1.04745	1.06619	0.971474	1.02837	0.832591	0.967253	0.981446	0.927097	0.90152	0.142478
O75663	TIP41-like protein OS=Homo sapiens GN=TIPRL PE=1 SV=2 - [TIPRL_HUMAN]	19.12	5	5	16	272	31.4237	5.90967	0.970488	0.96366	0.920241	0.951463	0.954281	1.03403	1.03622	1.00818	1.05961	0.143364
A0A0A0MQR8	MAP/microtubule affinity-regulating kinase 3 OS=Homo sapiens GN=MARK3 PE=1 SV=1 - [A0A0A0MQR8_HUMAN]	8.56	2	4	4	713	79.8258	9.53955		1.14586	1.22117	1.18351		0.923701	1.06577	0.994737	0.840494	0.143378
B3KR70	cDNA FLJ33764 fis, clone BRCOC2000360, highly similar to Vacuolar ATP synthase subunit S1 (EC 3.6.3.14) OS=Homo sapiens PE=2 SV=1 - [B3KR70_HUMAN]	10.23	4	4	8	430	47.7385	6.12549	0.988326	1.16939	1.16517	1.10763	1.02872	0.81009	0.992594	0.943801	0.852092	0.143537
Q9UPE4	Mitochondrial import inner membrane translocase subunit TIM44 OS=Homo sapiens GN=hTIM44 PE=2 SV=1 - [Q9UPE4_HUMAN]	35.18	13	13	46	415	47.3365	7.38623	0.971127	1.01327	1.02327	1.00255	1.11315	1.04319	1.02332	1.05988	1.05718	0.143645
Q9BTZ2	Dehydrogenase/reductase SDR family member 4 OS=Homo sapiens GN=DHRS4 PE=1 SV=3 - [DHRS4_HUMAN]	7.91	2	2	8	278	29.5184	8.55811	0.965788	1.00616	0.984051	0.985334	1.02746	1.01359	0.99577	1.01227	1.02734	0.143737
B2R5U1	cDNA, FLJ92620, highly similar to Homo sapiens staphylococcal nuclease domain containing 1 (SND1),mRNA OS=Homo sapiens PE=2 SV=1 - [B2R5U1_HUMAN]	36.5	2	30	108	885	99.6093	6.96143	0.993865	0.981873	0.999319	0.991686	1.02761	1.00645	0.997318	1.01046	1.01893	0.143809
J3KS15	Protein MRPL58 (Fragment) OS=Homo sapiens GN=MRPL58 PE=1 SV=1 - [J3KS15_HUMAN]	31.25	5	5	9	192	21.8914	9.71533	1.02378	0.962949	0.863723	0.950152	0.98895	1.13025	1.06889	1.0627	1.11845	0.143878
A8KA19	cDNA FLJ75831, highly similar to Homo sapiens exportin, tRNA (nuclear export receptor for tRNAs) (XPOT), mRNA OS=Homo sapiens PE=2 SV=1 - [A8KA19_HUMAN]	27.96	21	21	64	962	109.849	5.38916	0.965677	1.00397	1.01963	0.996427	1.05771	1.00345	1.08536	1.04884	1.0526	0.143997
Q15907	Ras-related protein Rab-11B OS=Homo sapiens GN=RAB11B PE=1 SV=4 - [RB11B_HUMAN]	60.09	11	12	58	218	24.4735	5.93506	0.926891	0.968369	1.02912	0.974792	1.08045	1.04177	1.00363	1.04195	1.06889	0.14414
Q00535	Cyclin-dependent-like kinase 5 OS=Homo sapiens GN=CDK5 PE=1 SV=3 - [CDK5_HUMAN]	13.01	3	4	11	292	33.2832	7.66455	0.974302	1.12481	1.14627	1.0818	1.01732	0.97418	0.837138	0.942879	0.871587	0.144212
B3KRK2	DEAD (Asp-Glu-Ala-Asp) box polypeptide 41, isoform CRA_a OS=Homo sapiens GN=DDX41 PE=2 SV=1 - [B3KRK2_HUMAN]	25.4	11	11	26	496	55.3737	8.17725	0.966308	0.996773	1.00098	0.988021	1.03465	0.991485	1.04823	1.02479	1.03721	0.144315
Q59EZ3	Insulin-like growth factor 2 receptor variant (Fragment) OS=Homo sapiens PE=2 SV=1 - [Q59EZ3_HUMAN]	9.57	19	19	29	2414	265.943	5.8335	0.968708	1.04226	1.19564	1.06887	0.994857	0.912373	0.69994	0.869057	0.813063	0.144534
H0YN26	Acidic leucine-rich nuclear phosphoprotein 32 family member A OS=Homo sapiens GN=ANP32A PE=1 SV=1 - [H0YN26_HUMAN]	47.46	5	11	75	177	19.9851	4.57666	0.976705	0.973761	0.937235	0.962567	1.06777	1.05613	0.960575	1.02816	1.06814	0.144671
B3KX19	cDNA FLJ44500 fis, clone UTERU3000828, highly similar to 116 kDa U5 small nuclear ribonucleoprotein component OS=Homo sapiens PE=2 SV=1 - [B3KX19_HUMAN]	45.43	35	36	135	962	108.142	4.99561	1.02774	1.01549	1.02779	1.02367	0.93669	1.01646	0.989038	0.980731	0.958049	0.144929
Q8TAT6	Nuclear protein localization protein 4 homolog OS=Homo sapiens GN=NPLOC4 PE=1 SV=3 - [NPL4_HUMAN]	24.84	12	13	24	608	68.0769	6.37939	0.991185	0.968447	0.939206	0.966279	1.04656	0.968237	1.05062	1.02181	1.05747	0.145193
Q6KB66	Keratin, type II cytoskeletal 80 OS=Homo sapiens GN=KRT80 PE=1 SV=2 - [K2C80_HUMAN]	25	9	10	24	452	50.4938	5.66846	0.989497	1.00936	0.990336	0.996398	0.990122	1.10433	1.10155	1.06533	1.06919	0.145217
Q9Y6D5	Brefeldin A-inhibited guanine nucleotide-exchange protein 2 OS=Homo sapiens GN=ARFGEF2 PE=1 SV=3 - [BIG2_HUMAN]	5.49	3	8	16	1785	201.909	6.32861	0.965949	1.00208	1.02319	0.997075	1.07257	1.04524	1.00861	1.04214	1.0452	0.145233
A0A024R1X8	Junction plakoglobin, isoform CRA_a OS=Homo sapiens GN=JUP PE=4 SV=1 - [A0A024R1X8_HUMAN]	46.98	22	28	141	745	81.6748	6.13818	1.0008	1.03083	1.11168	1.04777	0.986258	1.00767	0.919191	0.971038	0.926766	0.14533
Q9H7B4	Histone-lysine N-methyltransferase SMYD3 OS=Homo sapiens GN=SMYD3 PE=1 SV=4 - [SMYD3_HUMAN]	9.35	2	3	15	428	49.0646	7.25439	0.968257	1.18191		1.07509	0.85074	0.734667		0.792704	0.73734	0.145867
B3KXN9	cDNA FLJ45793 fis, clone NT2RI2009233 OS=Homo sapiens PE=2 SV=1 - [B3KXN9_HUMAN]	19.63	5	5	8	270	29.835	6.03662	0.974127	0.962647	1.01184	0.982871	1.22172	1.08222	1.00144	1.10179	1.12099	0.146065
Q8TEM1	Nuclear pore membrane glycoprotein 210 OS=Homo sapiens GN=NUP210 PE=1 SV=3 - [PO210_HUMAN]	12.72	21	21	48	1887	204.983	6.81494	1.05442	1.04621	0.969992	1.02354	0.915046	0.922339	1.01159	0.94966	0.927819	0.146348
Q5ZEY3	Glyceraldehyde-3-phosphate dehydrogenase (Fragment) OS=Homo sapiens GN=GAPD PE=2 SV=1 - [Q5ZEY3_HUMAN]	69.77	1	6	140	86	9.19504	9.71533	0.84191	0.90666	1.02044	0.923004	1.14838	1.11666	0.945497	1.07018	1.15945	0.146415
B7ZKY2	Calcium/calmodulin-dependent serine protein kinase (MAGUK family) OS=Homo sapiens GN=CASK PE=2 SV=1 - [B7ZKY2_HUMAN]	5.91	5	5	12	897	102.019	6.40479	0.98989	1.02404	1.06711	1.02701	1.00209	0.901875	0.975369	0.959778	0.934534	0.146421
Q96II8	Leucine-rich repeat and calponin homology domain-containing protein 3 OS=Homo sapiens GN=LRCH3 PE=1 SV=2 - [LRCH3_HUMAN]	10.3	6	6	11	777	86.03	6.7124	1.01403	1.03054	1.23706	1.09387	0.989781	0.981506	0.874203	0.948497	0.867099	0.14649
E9PRZ9	Small acidic protein (Fragment) OS=Homo sapiens GN=C11orf58 PE=1 SV=1 - [E9PRZ9_HUMAN]	34.44	3	3	8	90	10.0317	5.94775	1.05139	0.976993	0.909441	0.979274	1.03172	1.08298	1.05788	1.05753	1.07991	0.147009
Q9UBP6	tRNA (guanine-N(7)-)-methyltransferase OS=Homo sapiens GN=METTL1 PE=1 SV=1 - [TRMB_HUMAN]	3.99	1	1	3	276	31.4511	7.63525	1.01046	1.10791		1.05919	0.931676	0.790811		0.861243	0.813118	0.147013
P53999	Activated RNA polymerase II transcriptional coactivator p15 OS=Homo sapiens GN=SUB1 PE=1 SV=3 - [TCP4_HUMAN]	45.67	7	7	74	127	14.3864	9.59814	0.988375	0.955922	0.932008	0.958769	0.963785	1.03095	1.02983	1.00819	1.05154	0.147459
Q9P0M6	Core histone macro-H2A.2 OS=Homo sapiens GN=H2AFY2 PE=1 SV=3 - [H2AW_HUMAN]	20.7	5	7	13	372	40.0334	9.68604	1.01621	1.00934	0.949119	0.991558	1.03939	1.01173	1.06095	1.03736	1.04619	0.148525
O75367	Core histone macro-H2A.1 OS=Homo sapiens GN=H2AFY PE=1 SV=4 - [H2AY_HUMAN]	51.88	15	17	85	372	39.5925	9.78857	0.959695	0.995307	0.95865	0.971217	1.07528	1.00992	0.985649	1.02362	1.05395	0.148792
Q9H993	Protein-glutamate O-methyltransferase OS=Homo sapiens GN=ARMT1 PE=1 SV=1 - [ARMT1_HUMAN]	13.15	5	5	9	441	51.1399	5.75732	0.99607	0.914603	1.01921	0.976626	0.996533	1.1311	1.07111	1.06625	1.09177	0.148835
Q9BU68	Proline-rich protein 15-like protein OS=Homo sapiens GN=PRR15L PE=3 SV=1 - [PR15L_HUMAN]	16.5	1	1	4	103	11.6981	9.49561		1.03938	1.16363	1.1015		0.963852	0.844818	0.904335	0.820999	0.148978
O76021	Ribosomal L1 domain-containing protein 1 OS=Homo sapiens GN=RSL1D1 PE=1 SV=3 - [RL1D1_HUMAN]	41.22	22	22	93	490	54.9389	10.1255	1.2033	1.41341	0.919634	1.17878	0.628018	0.496732	1.12864	0.751129	0.637208	0.149174
H3BQA6	Cyclin-D1-binding protein 1 OS=Homo sapiens GN=CCNDBP1 PE=1 SV=1 - [H3BQA6_HUMAN]	20.97	1	1	2	62	7.07875	5.97314	0.952382	0.718626		0.835504	1.08177	1.25371		1.16774	1.39765	0.149183
Q6UXN9	WD repeat-containing protein 82 OS=Homo sapiens GN=WDR82 PE=1 SV=1 - [WDR82_HUMAN]	13.42	4	4	5	313	35.0565	7.69385	0.956599	0.953335		0.954967	1.0507	1.1991		1.1249	1.17794	0.149208
Q9NPJ3	Acyl-coenzyme A thioesterase 13 OS=Homo sapiens GN=ACOT13 PE=1 SV=1 - [ACO13_HUMAN]	15.71	2	2	7	140	14.9509	9.14404	0.969654	0.94552	1.01781	0.977661	1.07686	1.04009	0.990949	1.03597	1.05964	0.149377
Q9BQP7	Mitochondrial genome maintenance exonuclease 1 OS=Homo sapiens GN=MGME1 PE=1 SV=1 - [MGME1_HUMAN]	5.23	2	2	3	344	39.396	7.6792		1.01732	1.12345	1.07038		0.957895	0.873863	0.915879	0.855656	0.149923
E9PP55	E3 ubiquitin-protein ligase RNF170 (Fragment) OS=Homo sapiens GN=RNF170 PE=1 SV=1 - [E9PP55_HUMAN]	12.17	1	1	3	115	12.9674	4.91943	0.915709	0.83762	1.00821	0.920512	1.08969	1.02639	0.968266	1.02812	1.11689	0.149927
A8K359	cDNA FLJ76102, highly similar to Homo sapiens excision repair cross-complementing rodent repair deficiency, complementation group 3 (xeroderma pigmentosum group B complementing) (ERCC3), mRNA OS=Homo sapiens PE=2 SV=1 - [A8K359_HUMAN]	2.56	2	2	4	782	89.231	7.2251	1.03953	0.999836		1.01968	0.956016	0.978855		0.967436	0.94876	0.150017
O15155	BET1 homolog OS=Homo sapiens GN=BET1 PE=1 SV=1 - [BET1_HUMAN]	15.25	1	1	4	118	13.2808	9.05615	1.04055	1.00394	1.05015	1.03155	1.01998	0.904625	0.975866	0.966822	0.937255	0.150296
Q00765	Receptor expression-enhancing protein 5 OS=Homo sapiens GN=REEP5 PE=1 SV=3 - [REEP5_HUMAN]	28.04	7	7	24	189	21.479	8.104	1.00535	0.996139	0.912335	0.971275	1.04544	1.04398	1.0005	1.02997	1.06043	0.15046
Q13724	Mannosyl-oligosaccharide glucosidase OS=Homo sapiens GN=MOGS PE=1 SV=5 - [MOGS_HUMAN]	13.38	9	9	15	837	91.8606	8.89502	0.922986	1.01302	0.954623	0.963542	1.09667	0.984014	1.03327	1.03799	1.07726	0.15052
E7BSV0	Receptor protein-tyrosine kinase OS=Homo sapiens GN=EGFR PE=2 SV=1 - [E7BSV0_HUMAN]	13.2	10	11	23	1136	125.719	6.65381	1.08305	1.13901	1.03202	1.08469	0.976446	0.989188	1.06624	1.01063	0.931718	0.15058
O60502	Protein O-GlcNAcase OS=Homo sapiens GN=MGEA5 PE=1 SV=2 - [OGA_HUMAN]	7.21	6	6	15	916	102.849	4.90674	0.930174	0.972409	0.900863	0.934482	1.06964	0.941279	1.01978	1.01023	1.08106	0.151045
Q9BQ61	Uncharacterized protein C19orf43 OS=Homo sapiens GN=C19orf43 PE=1 SV=1 - [CS043_HUMAN]	33.52	4	4	25	176	18.4082	9.43701	0.969373	1.00687	0.979478	0.985241	1.03485	1.07321	0.989463	1.03251	1.04798	0.15105
B2RTX8	WAPAL protein OS=Homo sapiens GN=WAPAL PE=2 SV=1 - [B2RTX8_HUMAN]	7.35	8	8	14	1184	132.143	5.47803	1.04808	1.06921	1.00013	1.03914	0.993207	1.00152	1.01078	1.00184	0.964099	0.151147
M0R1G0	SH3KBP1-binding protein 1 (Fragment) OS=Homo sapiens GN=SHKBP1 PE=1 SV=1 - [M0R1G0_HUMAN]	22.38	2	2	3	143	15.0944	8.54346	0.921259	0.913		0.91713	1.15296	1.00884		1.0809	1.17857	0.151354
O43752	Syntaxin-6 OS=Homo sapiens GN=STX6 PE=1 SV=1 - [STX6_HUMAN]	9.41	2	2	5	255	29.1578	4.93213	1.04614	0.942096	0.844733	0.944324	1.02273	1.07986	1.05143	1.05134	1.11333	0.151361
O95714	E3 ubiquitin-protein ligase HERC2 OS=Homo sapiens GN=HERC2 PE=1 SV=2 - [HERC2_HUMAN]	1.72	7	7	15	4834	526.895	6.27783	0.973302	0.977108	1.09634	1.01558	0.963792	0.929529	0.931053	0.941458	0.927012	0.151681
B4DEQ0	Electron transfer flavoprotein-ubiquinone oxidoreductase, mitochondrial OS=Homo sapiens PE=2 SV=1 - [B4DEQ0_HUMAN]	13.31	5	5	9	556	61.3461	6.80029	1.01732	1.07341	1.32532	1.13868	1.04402	0.903835	0.910909	0.952921	0.836864	0.151936
P10644	cAMP-dependent protein kinase type I-alpha regulatory subunit OS=Homo sapiens GN=PRKAR1A PE=1 SV=1 - [KAP0_HUMAN]	32.55	10	13	31	381	42.955	5.35107	1.00682	1.00164	1.21379	1.07408	0.94595	0.992912	0.785635	0.908165	0.845526	0.152003
Q8TD30	Alanine aminotransferase 2 OS=Homo sapiens GN=GPT2 PE=1 SV=1 - [ALAT2_HUMAN]	21.99	9	9	19	523	57.8664	7.7085	1.09277	1.0636	0.9895	1.04862	0.87622	0.93137	1.03824	0.948609	0.904622	0.152104
Q5VV41	Rho guanine nucleotide exchange factor 16 OS=Homo sapiens GN=ARHGEF16 PE=1 SV=1 - [ARHGG_HUMAN]	26.38	15	15	47	709	80.0552	7.35693	1.022	0.995913	0.976425	0.998113	0.947213	0.945628	0.99325	0.96203	0.963849	0.152422
Q86WA8	Lon protease homolog 2, peroxisomal OS=Homo sapiens GN=LONP2 PE=1 SV=1 - [LONP2_HUMAN]	4.69	3	3	6	852	94.5572	7.29834	0.954322	1.08611	1.243	1.09448	1.01485	0.779724	0.919514	0.904695	0.826599	0.153167
B3KRA8	cDNA FLJ33947 fis, clone CTONG2018343, highly similar to Ubiquitin ligase protein MIB1 (EC 6.3.2.-) OS=Homo sapiens PE=2 SV=1 - [B3KRA8_HUMAN]	3.27	2	2	3	795	86.4111	6.46826	1.11937	0.849545	1.37915	1.11602	0.847395	0.931401	0.480226	0.753008	0.674725	0.153309
E9PPJ5	Midkine (Fragment) OS=Homo sapiens GN=MDK PE=1 SV=1 - [E9PPJ5_HUMAN]	15.27	2	2	2	131	14.3643	9.53955	0.995418	0.98201		0.988714	0.930963	0.96478		0.947872	0.958692	0.153835
Q8NFC6	Biorientation of chromosomes in cell division protein 1-like 1 OS=Homo sapiens GN=BOD1L1 PE=1 SV=2 - [BD1L1_HUMAN]	2.82	7	8	11	3051	330.266	5.08447	0.994776	1.01169	0.979072	0.99518	0.938095	0.995766	0.94154	0.958467	0.963109	0.154074
P35221	Catenin alpha-1 OS=Homo sapiens GN=CTNNA1 PE=1 SV=1 - [CTNA1_HUMAN]	50.22	30	42	203	906	100.009	6.29053	1.06004	1.04171	1.0011	1.03428	0.920717	0.951433	1.03255	0.968234	0.936139	0.154074
P49411	Elongation factor Tu, mitochondrial OS=Homo sapiens GN=TUFM PE=1 SV=2 - [EFTU_HUMAN]	56.42	22	22	171	452	49.5102	7.60596	0.993698	1.00399	0.993283	0.99699	0.997726	1.01253	1.02103	1.01043	1.01348	0.154086
Q96P70	Importin-9 OS=Homo sapiens GN=IPO9 PE=1 SV=3 - [IPO9_HUMAN]	17.29	15	15	46	1041	115.889	4.80518	0.99615	1.02446	1.01308	1.01123	0.979428	0.988142	1.00618	0.991249	0.980243	0.154227
Q04760	Lactoylglutathione lyase OS=Homo sapiens GN=GLO1 PE=1 SV=4 - [LGUL_HUMAN]	42.39	8	8	65	184	20.7642	5.31299	0.997729	0.952517	0.915948	0.955398	0.965983	1.03612	1.08842	1.03018	1.07827	0.154296
A0A0S2Z5M7	Peroxisomal biogenesis factor 26 isoform 2 (Fragment) OS=Homo sapiens GN=PEX26 PE=2 SV=1 - [A0A0S2Z5M7_HUMAN]	8.98	2	2	2	256	28.3697	5.47803	0.919763	0.98055		0.950156	1.20383	1.05546		1.12965	1.1889	0.154535
A0A0C4DG62	ADP-ribosylation factor-like protein 6-interacting protein 4 OS=Homo sapiens GN=ARL6IP4 PE=1 SV=1 - [A0A0C4DG62_HUMAN]	16.97	3	3	7	218	24.5769	10.9458	1.05702	1.14792	1.00276	1.06924	0.975096	0.926749	1.03201	0.977952	0.914628	0.154882
B2R7C5	DNA helicase OS=Homo sapiens PE=2 SV=1 - [B2R7C5_HUMAN]	46.29	33	33	109	808	90.952	5.77002	1.04002	0.993359	1.09374	1.04237	0.936909	1.03268	0.898668	0.956085	0.91722	0.154908
P62906	60S ribosomal protein L10a OS=Homo sapiens GN=RPL10A PE=1 SV=2 - [RL10A_HUMAN]	46.54	11	11	133	217	24.8155	9.93506	1.09868	1.08621	0.973484	1.05279	0.8716	0.867613	1.0462	0.928471	0.881914	0.155174
B7Z4B1	cDNA FLJ50801, highly similar to Coiled-coil domain-containing protein 55 OS=Homo sapiens PE=2 SV=1 - [B7Z4B1_HUMAN]	5.51	3	3	3	490	58.8032	9.20264	1.15715		1.02397	1.09056	0.872059		0.956779	0.914419	0.838486	0.155312
Q05BU6	SFRS11 protein (Fragment) OS=Homo sapiens GN=SFRS11 PE=2 SV=1 - [Q05BU6_HUMAN]	32.93	6	6	24	246	24.8321	6.34131	0.878989	1.03955	1.00573	0.974755	1.29915	1.03842	1.0813	1.13962	1.16914	0.155519
H0Y465	Neurofibromin (Fragment) OS=Homo sapiens GN=NF1 PE=1 SV=1 - [H0Y465_HUMAN]	4.4	9	9	18	2502	281.036	7.28369	1.00672	0.969511	1.38259	1.11961	0.956318	0.895603	0.729702	0.860541	0.768609	0.155572
O00743	Serine/threonine-protein phosphatase 6 catalytic subunit OS=Homo sapiens GN=PPP6C PE=1 SV=1 - [PPP6_HUMAN]	26.89	7	7	24	305	35.1215	5.69385	0.934656	1.01048	0.986253	0.97713	1.04415	0.988803	1.07666	1.03654	1.0608	0.155735
P15880	40S ribosomal protein S2 OS=Homo sapiens GN=RPS2 PE=1 SV=2 - [RS2_HUMAN]	44.37	10	15	161	293	31.3046	10.2427	1.0996	1.05747	1.00868	1.05525	0.842066	0.863904	1.0645	0.923491	0.875141	0.155916
P42574	Caspase-3 OS=Homo sapiens GN=CASP3 PE=1 SV=2 - [CASP3_HUMAN]	13.72	2	3	4	277	31.5875	6.53662	1.02578	0.981448		1.00361	1.19801	1.08315		1.14058	1.13647	0.156046
P05204	Non-histone chromosomal protein HMG-17 OS=Homo sapiens GN=HMGN2 PE=1 SV=3 - [HMGN2_HUMAN]	30	2	3	6	90	9.38706	9.99365	1.09109	0.684484	0.741139	0.838903	0.925523	1.30278	1.1698	1.1327	1.35022	0.156059
A0AUY0	RABL2A protein OS=Homo sapiens GN=RABL2A PE=2 SV=1 - [A0AUY0_HUMAN]	14.29	2	2	2	224	25.7205	4.79248	1.05253	1.38879		1.22066	0.861466	0.828521		0.844994	0.692245	0.156187
Q96T76	MMS19 nucleotide excision repair protein homolog OS=Homo sapiens GN=MMS19 PE=1 SV=2 - [MMS19_HUMAN]	13.01	11	11	29	1030	113.217	6.354	1.009	0.917156	0.961424	0.962526	0.99407	1.00739	1.05997	1.02048	1.06021	0.15666
B4DES6	cDNA FLJ52441, highly similar to Zinc finger protein 512 OS=Homo sapiens PE=2 SV=1 - [B4DES6_HUMAN]	4.11	1	2	4	462	53.0873	9.59814	0.97441	0.991362		0.982886	1.03855	1.12698		1.08276	1.10162	0.156754
B4DM03	cDNA FLJ50574, highly similar to ATP-dependent RNA helicase DDX24 (EC 3.6.1.-) OS=Homo sapiens PE=2 SV=1 - [B4DM03_HUMAN]	21.36	14	14	36	763	85.4567	8.42627	1.13203	1.291	0.92059	1.11454	0.783154	0.698412	1.06135	0.847639	0.76053	0.156826
Q96PK6	RNA-binding protein 14 OS=Homo sapiens GN=RBM14 PE=1 SV=2 - [RBM14_HUMAN]	31.24	19	19	93	669	69.4489	9.67139	0.984472	0.983593	0.838753	0.935606	0.988814	1.0319	1.06205	1.02759	1.09831	0.156968
O95155	Ubiquitin conjugation factor E4 B OS=Homo sapiens GN=UBE4B PE=1 SV=1 - [UBE4B_HUMAN]	9.22	9	9	18	1302	146.092	6.55127	0.945766	1.15465	1.19669	1.09904	1.05599	0.84516	0.857427	0.919525	0.836665	0.157508
Q15121	Astrocytic phosphoprotein PEA-15 OS=Homo sapiens GN=PEA15 PE=1 SV=2 - [PEA15_HUMAN]	22.31	2	2	3	130	15.0308	5.021		0.862997	0.972256	0.917627		1.10028	1.02652	1.0634	1.15886	0.157521
A8K9V9	cDNA FLJ76064 OS=Homo sapiens PE=2 SV=1 - [A8K9V9_HUMAN]	14.19	4	4	6	310	34.5111	5.43994	0.891568	0.960491	0.958735	0.936931	0.98275	0.958698	1.01374	0.985062	1.05137	0.157536
F8VNT9	CD63 antigen (Fragment) OS=Homo sapiens GN=CD63 PE=1 SV=1 - [F8VNT9_HUMAN]	15.04	3	3	11	133	14.2554	7.59131	1.02965	1.0099	0.974732	1.00476	0.96296	0.992436	0.915857	0.957084	0.952549	0.157784
A0A024R4V8	G-2 and S-phase expressed 1, isoform CRA_b OS=Homo sapiens GN=GTSE1 PE=4 SV=1 - [A0A024R4V8_HUMAN]	2.73	1	1	4	586	61.5361	10.1401	1.05971	1.03241	1.19847	1.09686	1.00504	1.03855	0.940049	0.994546	0.906718	0.157821
Q8N8N7	Prostaglandin reductase 2 OS=Homo sapiens GN=PTGR2 PE=1 SV=1 - [PTGR2_HUMAN]	7.98	3	3	5	351	38.4743	5.41455	1.01115	0.918282	0.981766	0.9704	1.10759	1.03059	0.996032	1.04474	1.0766	0.157971
P46781	40S ribosomal protein S9 OS=Homo sapiens GN=RPS9 PE=1 SV=3 - [RS9_HUMAN]	54.12	14	14	82	194	22.5776	10.6528	1.04427	1.05141	0.996231	1.03064	0.894774	0.885339	1.03862	0.939578	0.911649	0.158075
A8K4R1	cDNA FLJ77420, highly similar to Homo sapiens cancer susceptibility candidate 4 (CASC4), transcript variant 2, mRNA OS=Homo sapiens PE=2 SV=1 - [A8K4R1_HUMAN]	12.63	5	5	8	380	43.3053	6.90283	1.03007	0.931937	1.00783	0.989946	0.965985	0.921725	0.889209	0.92564	0.93504	0.158194
Q9BWT3	Poly(A) polymerase gamma OS=Homo sapiens GN=PAPOLG PE=1 SV=2 - [PAPOG_HUMAN]	9.24	3	4	5	736	82.7512	9.14404	0.838498	0.821595		0.830046	1.43604	1.05796		1.247	1.50232	0.158425
Q8WZA9	Immunity-related GTPase family Q protein OS=Homo sapiens GN=IRGQ PE=1 SV=1 - [IRGQ_HUMAN]	8.51	4	4	5	623	62.6785	4.88135		1.04556	1.11294	1.07925		1.00375	1.00633	1.00504	0.931237	0.158664
Q13136	Liprin-alpha-1 OS=Homo sapiens GN=PPFIA1 PE=1 SV=1 - [LIPA1_HUMAN]	5.66	6	6	10	1202	135.695	6.29053	1.02555	0.979542	1.04695	1.01735	0.989319	0.985763	0.916891	0.963991	0.947553	0.158664
Q00653	Nuclear factor NF-kappa-B p100 subunit OS=Homo sapiens GN=NFKB2 PE=1 SV=4 - [NFKB2_HUMAN]	3	2	2	3	900	96.6889	6.25244	0.943824	0.928571	1.02332	0.965239	1.09984	0.983049	1.04498	1.04262	1.08017	0.15868
H3BVD9	Kunitz-type protease inhibitor 1 (Fragment) OS=Homo sapiens GN=SPINT1 PE=1 SV=1 - [H3BVD9_HUMAN]	22.67	11	11	29	472	52.3401	5.52881	0.960999	1.01792	1.06803	1.01565	0.99191	0.934116	0.837153	0.92106	0.906868	0.158946
Q53F27	Transmembrane protein 14C variant (Fragment) OS=Homo sapiens PE=2 SV=1 - [Q53F27_HUMAN]	15.18	1	1	2	112	11.573	9.87646		1.10344	1.01531	1.05938		0.788304	0.941654	0.864979	0.816499	0.159012
F5H1D6	DNA polymerase epsilon catalytic subunit A OS=Homo sapiens GN=POLE PE=1 SV=1 - [F5H1D6_HUMAN]	4.07	8	8	11	2259	258.19	6.45557	1.0481	0.978926	1.16844	1.06515	0.964472	1.00578	0.879103	0.949786	0.891688	0.159036
P62306	Small nuclear ribonucleoprotein F OS=Homo sapiens GN=SNRPF PE=1 SV=1 - [RUXF_HUMAN]	24.42	3	3	21	86	9.71878	4.66553	0.986199	1.01758	0.96214	0.988641	0.963264	0.967901	0.920122	0.950429	0.961349	0.159076
B2R7R5	cDNA, FLJ93570, highly similar to Homo sapiens phosphoribosyl pyrophosphate synthetase-associated protein 2 (PRPSAP2), mRNA OS=Homo sapiens PE=2 SV=1 - [B2R7R5_HUMAN]	42.55	9	12	46	369	40.8573	7.44482	0.916336	0.952946	0.983359	0.950881	1.04779	0.963594	1.17512	1.06217	1.11704	0.159358
P35580	Myosin-10 OS=Homo sapiens GN=MYH10 PE=1 SV=3 - [MYH10_HUMAN]	18.22	19	34	117	1976	228.858	5.5415	0.96499	1.06866	1.0573	1.03032	0.999418	0.95951	0.938978	0.965969	0.937545	0.159726
Q92903	Phosphatidate cytidylyltransferase 1 OS=Homo sapiens GN=CDS1 PE=2 SV=2 - [CDS1_HUMAN]	8.89	2	3	5	461	53.2695	8.08936		1.12114	1.1112	1.11617		0.888317	1.03089	0.959605	0.85973	0.159829
O95182	NADH dehydrogenase [ubiquinone] 1 alpha subcomplex subunit 7 OS=Homo sapiens GN=NDUFA7 PE=1 SV=3 - [NDUA7_HUMAN]	15.04	2	2	7	113	12.5436	10.1841	1.02867	0.968897	0.877309	0.958292	1.01215	1.06369	1.03928	1.03838	1.08357	0.159875
B3KRY3	cDNA FLJ35079 fis, clone PLACE6005283, highly similar to Lysosome-associated membrane glycoprotein 1 OS=Homo sapiens PE=2 SV=1 - [B3KRY3_HUMAN]	10.89	5	5	24	395	42.5584	8.49951	0.93576	0.84946	1.01218	0.932466	1.00847	1.11839	0.989921	1.03892	1.11417	0.159934
Q7KZ85	Transcription elongation factor SPT6 OS=Homo sapiens GN=SUPT6H PE=1 SV=2 - [SPT6H_HUMAN]	15.93	24	24	43	1726	198.949	4.90674	0.986625	0.972479	0.984839	0.981315	1.01471	1.04814	0.982172	1.01501	1.03433	0.160015
Q9BUG9	Integrin beta OS=Homo sapiens GN=ITGB8 PE=2 SV=1 - [Q9BUG9_HUMAN]	5.92	2	2	3	439	48.388	6.23975	0.912803	1.19605	1.08367	1.06417	0.982309	0.707512	0.90346	0.864427	0.812299	0.160165
Q9NPH2	Inositol-3-phosphate synthase 1 OS=Homo sapiens GN=ISYNA1 PE=1 SV=1 - [INO1_HUMAN]	20.25	10	10	27	558	61.0291	5.75732	0.880899	1.00629	1.01827	0.968487	1.16355	1.05855	1.00963	1.07724	1.1123	0.160285
Q15836	Vesicle-associated membrane protein 3 OS=Homo sapiens GN=VAMP3 PE=1 SV=3 - [VAMP3_HUMAN]	33	1	2	13	100	11.302	8.79248	1.0476	1.07411	0.982117	1.03461	0.962025	1.00489	0.981935	0.982949	0.950069	0.160322
Q9GZP4	PITH domain-containing protein 1 OS=Homo sapiens GN=PITHD1 PE=1 SV=1 - [PITH1_HUMAN]	29.86	5	5	8	211	24.1627	5.74463	0.966278	0.968525	0.737935	0.890913	1.03114	0.983824	1.29621	1.10372	1.23887	0.160464
A0A024R3H2	Sortilin-related receptor, L(DLR class) A repeats-containing, isoform CRA_b OS=Homo sapiens GN=SORL1 PE=4 SV=1 - [A0A024R3H2_HUMAN]	4.79	8	8	12	2214	248.282	5.52881	0.950695	1.08763	1.07021	1.03618	1.01967	0.860115	0.894157	0.924646	0.892361	0.160589
B4DGM5	cDNA FLJ53983, highly similar to IWS1 homolog OS=Homo sapiens PE=2 SV=1 - [B4DGM5_HUMAN]	12.21	8	8	22	729	82.0719	4.77979	1.00052	1.09365	1.03417	1.04278	1.01172	0.967776	0.993728	0.991075	0.950417	0.160605
A8K646	cDNA FLJ75699, highly similar to Homo sapiens osteoclast stimulating factor 1 (OSTF1), mRNA OS=Homo sapiens PE=2 SV=1 - [A8K646_HUMAN]	21.96	3	3	10	214	23.6999	5.68115	1.0123	1.20654	1.18015	1.133	1.0884	0.9667	0.966727	1.00728	0.889035	0.160625
B4DDR3	cDNA FLJ52148, highly similar to Apoptosis inhibitor 5 OS=Homo sapiens PE=2 SV=1 - [B4DDR3_HUMAN]	35.05	1	12	53	331	37.4847	8.67529	1.01592	0.884019	0.914739	0.938225	0.957483	1.06057	1.08189	1.03331	1.10135	0.160907
P50995	Annexin A11 OS=Homo sapiens GN=ANXA11 PE=1 SV=1 - [ANX11_HUMAN]	33.86	1	15	85	505	54.3551	7.6499	1.18709	1.09809	0.970194	1.08512	0.804353	0.959335	1.02465	0.929448	0.856535	0.161302
A0A075BPP5	Methyl CpG binding protein 2 (Fragment) OS=Homo sapiens GN=MECP2 PE=4 SV=1 - [A0A075BPP5_HUMAN]	4.05	1	1	2	247	26.4475	10.7554	1.00638	1.03051		1.01844	1.06748	1.04347		1.05547	1.03636	0.161554
E9PHY5	Band 4.1-like protein 2 OS=Homo sapiens GN=EPB41L2 PE=1 SV=1 - [E9PHY5_HUMAN]	31.23	22	24	80	935	104.296	5.38916	1.04355	1.04	1.04242	1.04199	0.952086	1.0268	1.02245	1.00044	0.960126	0.161592
C9JPQ6	Guanine nucleotide-binding protein subunit beta-like protein 1 (Fragment) OS=Homo sapiens GN=GNB1L PE=1 SV=8 - [C9JPQ6_HUMAN]	30.11	3	3	3	93	9.90398	7.73779		1.07934	1.12517	1.10225		0.914084	1.02648	0.97028	0.880268	0.161684
Q5T6U8	High mobility group AT-hook 1 OS=Homo sapiens GN=HMGA1 PE=2 SV=1 - [Q5T6U8_HUMAN]	31.25	1	4	23	96	10.6726	10.3159	1.03304	0.98775	0.846849	0.955881	1.16078	0.979436	1.13912	1.09311	1.14357	0.161738
Q0JRZ9	F-BAR domain only protein 2 OS=Homo sapiens GN=FCHO2 PE=1 SV=2 - [FCHO2_HUMAN]	14.44	10	10	22	810	88.869	6.85889	1.03315	1.02596	1.06111	1.04007	1.01246	0.940876	1.02316	0.992164	0.953936	0.161849
A5YM53	ITGAV protein OS=Homo sapiens GN=ITGAV PE=2 SV=1 - [A5YM53_HUMAN]	15.08	13	13	23	1048	116.032	5.74463	1.01596	1.06343	1.04065	1.04001	0.97709	0.945161	1.03928	0.987177	0.949199	0.161909
O00515	Ladinin-1 OS=Homo sapiens GN=LAD1 PE=1 SV=2 - [LAD1_HUMAN]	44.49	20	20	74	517	57.0968	9.67139	1.01545	1.01051	0.966575	0.99751	1.05174	1.06914	1.00211	1.041	1.0436	0.16191
F8VNY5	Thyroid transcription factor 1-associated protein 26 (Fragment) OS=Homo sapiens GN=CCDC59 PE=1 SV=1 - [F8VNY5_HUMAN]	12.15	2	2	3	181	21.2649	9.48096	0.963116	1.16943	0.989771	1.04077	0.962992	0.839801	0.935427	0.91274	0.876984	0.161999
A0A0S2A5C8	Truncated Niemann-Pick C1 OS=Homo sapiens GN=NPC1 PE=4 SV=1 - [A0A0S2A5C8_HUMAN]	6.38	6	6	9	894	99.7845	4.98291	0.992722	0.940765	0.895346	0.942944	1.14682	1.00593	0.979406	1.04405	1.10723	0.162168
Q05DU1	GNL3L protein (Fragment) OS=Homo sapiens GN=GNL3L PE=2 SV=1 - [Q05DU1_HUMAN]	14.26	6	7	11	575	65.3113	9.49561	1.07555	1.00371	1.13461	1.07129	0.945667	1.05668	0.85699	0.953112	0.889686	0.162208
Q13595	Transformer-2 protein homolog alpha OS=Homo sapiens GN=TRA2A PE=1 SV=1 - [TRA2A_HUMAN]	11.35	2	3	11	282	32.6691	11.2681	0.981105	1.03073	1.02667	1.01283	1.03533	1.11509	1.04218	1.0642	1.05072	0.162795
Q8NFV4	Protein ABHD11 OS=Homo sapiens GN=ABHD11 PE=1 SV=1 - [ABHDB_HUMAN]	21.59	7	7	12	315	34.6681	9.48096	1.01558	1.0588	1.02665	1.03368	1.01943	1.00256	1.00791	1.00997	0.977061	0.162831
Q9Y4F5	Centrosomal protein of 170 kDa protein B OS=Homo sapiens GN=CEP170B PE=1 SV=4 - [C170B_HUMAN]	2.52	3	3	3	1589	171.584	6.84424	1.00756	1.10329	1.06621	1.05902	1.06015	0.92513	0.882415	0.955899	0.902628	0.16286
B4DZG6	cDNA FLJ53254, highly similar to Nucleoporin NDC1 OS=Homo sapiens PE=2 SV=1 - [B4DZG6_HUMAN]	15.04	5	5	14	339	37.9044	9.70068	1.03417	1.00486	1.02255	1.02053	0.88979	0.981618	1.00494	0.958782	0.939495	0.162941
B4E2B5	MICOS complex subunit MIC60 OS=Homo sapiens PE=2 SV=1 - [B4E2B5_HUMAN]	34.16	1	14	48	404	43.1939	9.20264	1.13102	1.05726		1.09414	0.854945	0.993842		0.924394	0.84486	0.163521
Q4KMP7	TBC1 domain family member 10B OS=Homo sapiens GN=TBC1D10B PE=1 SV=3 - [TB10B_HUMAN]	5.82	4	4	4	808	87.1447	9.18799	0.957318	1.00033	0.934163	0.963936	1.08705	1.01197	0.981371	1.0268	1.06521	0.163637
A0A024R5M9	Nuclear mitotic apparatus protein 1, isoform CRA_a OS=Homo sapiens GN=NUMA1 PE=4 SV=1 - [A0A024R5M9_HUMAN]	40.93	70	71	264	2101	236.372	5.79541	1.02839	1.07703	1.05088	1.0521	1.03441	1.02751	0.976007	1.01264	0.962496	0.163841
B3KS61	Protein-S-isoprenylcysteine O-methyltransferase OS=Homo sapiens PE=2 SV=1 - [B3KS61_HUMAN]	5.32	2	2	4	188	21.7209	6.26514	1.1403	1.00751	1.08989	1.07923	0.822776	0.942633	1.0646	0.943336	0.874079	0.163862
B2RBA0	cDNA, FLJ95388, highly similar to Homo sapiens step II splicing factor SLU7 (SLU7), mRNA OS=Homo sapiens PE=2 SV=1 - [B2RBA0_HUMAN]	2.39	1	1	3	586	68.3138	7.13721	1.04976	1.02521	0.967474	1.01415	0.873043	0.970901	0.982196	0.942046	0.928904	0.164086
P61326	Protein mago nashi homolog OS=Homo sapiens GN=MAGOH PE=1 SV=1 - [MGN_HUMAN]	50.68	7	7	19	146	17.1528	6.11279	0.987082	0.964951	0.893272	0.948435	0.984487	0.990436	1.04666	1.00719	1.06195	0.164243
Q9Y3L3	SH3 domain-binding protein 1 OS=Homo sapiens GN=SH3BP1 PE=1 SV=3 - [3BP1_HUMAN]	24.82	13	13	28	701	75.6658	6.771	1.014	0.985077	0.984711	0.994597	1.00195	1.01776	1.02343	1.01438	1.01989	0.164341
A0A0A0MTI6	Elongation of very long chain fatty acids protein OS=Homo sapiens GN=ELOVL5 PE=1 SV=1 - [A0A0A0MTI6_HUMAN]	6.49	2	2	3	262	30.7223	7.51807	1.02407		1.21345	1.11876	0.903161		0.924374	0.913767	0.816769	0.164363
Q96L91	E1A-binding protein p400 OS=Homo sapiens GN=EP400 PE=1 SV=4 - [EP400_HUMAN]	3.32	8	8	15	3159	343.276	9.18799	1.07574	1.00043	1.04768	1.04128	0.904384	0.930821	1.04374	0.95965	0.921606	0.164592
Q13769	THO complex subunit 5 homolog OS=Homo sapiens GN=THOC5 PE=1 SV=2 - [THOC5_HUMAN]	7.61	5	5	13	683	78.4579	6.87354	0.960184	0.990511	0.943073	0.964589	0.972176	1.0347	1.12802	1.04496	1.08332	0.16489
A0A1B0GW73	Uncharacterized protein OS=Homo sapiens PE=4 SV=1 - [A0A1B0GW73_HUMAN]	27.27	1	1	4	77	8.61726	6.78564	1.03293	1.1223	1.09497	1.0834	0.985189	0.9488	1.07832	1.0041	0.926808	0.165156
Q6PD62	RNA polymerase-associated protein CTR9 homolog OS=Homo sapiens GN=CTR9 PE=1 SV=1 - [CTR9_HUMAN]	8.53	8	8	21	1173	133.42	6.771	1.01013	0.98929	1.04176	1.01373	0.975887	0.96588	1.00326	0.981675	0.968381	0.165262
K7EPR5	cAMP-dependent protein kinase type I-alpha regulatory subunit (Fragment) OS=Homo sapiens GN=PRKAR1A PE=1 SV=8 - [K7EPR5_HUMAN]	46.67	1	2	5	45	5.05953	5.90967	1.05443	1.05578	1.09005	1.06675	1.06288	1.00864	0.942694	1.00474	0.941865	0.1659
Q8TB45	DEP domain-containing mTOR-interacting protein OS=Homo sapiens GN=DEPTOR PE=1 SV=2 - [DPTOR_HUMAN]	4.16	1	1	2	409	46.2643	8.07471		1.04206	0.993533	1.01779		0.950643	0.971812	0.961227	0.944422	0.166065
H7C504	Probable ATP-dependent RNA helicase DHX34 (Fragment) OS=Homo sapiens GN=DHX34 PE=1 SV=1 - [H7C504_HUMAN]	11.03	2	2	4	272	30.3082	7.84033	1.06111	0.977502	1.05877	1.03246	0.939202	1.0229	0.93174	0.964615	0.934288	0.166079
E7ENI6	Islet cell autoantigen 1 OS=Homo sapiens GN=ICA1 PE=1 SV=1 - [E7ENI6_HUMAN]	4.86	2	2	3	350	41.0779	9.18799	0.748861		0.903043	0.825952	1.06714		0.971556	1.01935	1.23415	0.166646
A8K6D2	cDNA FLJ76620, highly similar to Homo sapiens C2f protein (C2F), mRNA OS=Homo sapiens PE=2 SV=1 - [A8K6D2_HUMAN]	30.33	6	6	25	244	26.6751	9.17334	1.18218	1.13284	0.960136	1.09172	0.744533	0.849869	1.07759	0.890662	0.815834	0.166728
Q6DT37	Serine/threonine-protein kinase MRCK gamma OS=Homo sapiens GN=CDC42BPG PE=1 SV=2 - [MRCKG_HUMAN]	1.55	2	2	3	1551	172.352	6.27783	0.93874	0.963729	1.02843	0.976965	1.11687	1.10786	0.97493	1.06655	1.0917	0.166846
G3V1D1	Ferritin OS=Homo sapiens GN=FTH1 PE=1 SV=1 - [G3V1D1_HUMAN]	83.19	7	7	10	113	12.8683	5.30029	0.877134	0.797807	0.581334	0.752091	0.869379	0.923107	0.919528	0.904005	1.20199	0.166998
A0A024R478	COP9 constitutive photomorphogenic homolog subunit 7B (Arabidopsis), isoform CRA_a OS=Homo sapiens GN=COPS7B PE=4 SV=1 - [A0A024R478_HUMAN]	10.83	1	1	5	157	18.1454	7.34229	0.842379	0.862257	1.00489	0.903176	0.959877	1.07612	0.987213	1.00774	1.11577	0.167276
B0QYW5	Peroxisomal membrane protein PMP34 OS=Homo sapiens GN=SLC25A17 PE=1 SV=1 - [B0QYW5_HUMAN]	10.22	2	2	6	225	25.7053	10.3306	0.958137	1.07525	0.987018	1.0068	1.18753	1.00097	1.22157	1.13669	1.12901	0.167282
Q96NB3	Zinc finger protein 830 OS=Homo sapiens GN=ZNF830 PE=1 SV=2 - [ZN830_HUMAN]	2.15	1	1	2	372	41.9733	5.31299		0.887987	0.967012	0.9275		1.12609	1.01641	1.07125	1.15499	0.167308
H7BXY6	Tetraspanin OS=Homo sapiens GN=TSPAN14 PE=1 SV=1 - [H7BXY6_HUMAN]	5.16	1	1	2	213	23.902	7.76709		1.02035	1.14829	1.08432		0.929775	0.723633	0.826704	0.762415	0.167666
B4DGM3	SWI/SNF-related matrix-associated actin-dependent regulator of chromatin subfamily E member 1 OS=Homo sapiens GN=SMARCE1 PE=1 SV=1 - [B4DGM3_HUMAN]	15.01	5	6	11	393	44.7426	4.83057	1.00451	1.01935	1.32289	1.11558	0.999364	0.922934	0.55151	0.824603	0.739167	0.167676
P42858	Huntingtin OS=Homo sapiens GN=HTT PE=1 SV=2 - [HD_HUMAN]	1.91	4	4	4	3142	347.383	6.20166	1.03664	1.0408	1.02039	1.03261	0.993732	0.898355	1.01838	0.970154	0.939516	0.16778
P42677	40S ribosomal protein S27 OS=Homo sapiens GN=RPS27 PE=1 SV=3 - [RS27_HUMAN]	39.29	2	4	29	84	9.45484	9.45166	1.11696	1.08648	0.916665	1.04003	0.852297	0.828774	1.01166	0.897578	0.863027	0.168073
H3BST5	Mitochondrial Rho GTPase 2 (Fragment) OS=Homo sapiens GN=RHOT2 PE=1 SV=2 - [H3BST5_HUMAN]	23.56	2	4	7	208	23.0718	4.71631	1.13528		1.01637	1.07582	0.952738		0.81779	0.885264	0.82287	0.168234
Q5VIR6	Vacuolar protein sorting-associated protein 53 homolog OS=Homo sapiens GN=VPS53 PE=1 SV=1 - [VPS53_HUMAN]	9.73	7	8	11	699	79.602	6.02393	0.950289	1.03053	1.37718	1.11933	0.905636	0.920994	0.866104	0.897578	0.801888	0.168274
C9J0J7	Profilin OS=Homo sapiens GN=PFN2 PE=1 SV=1 - [C9J0J7_HUMAN]	67.03	2	6	27	91	9.83408	9.17334	0.993493	0.887079	0.898668	0.926413	0.958988	1.08012	0.989262	1.00946	1.08964	0.169437
P78346	Ribonuclease P protein subunit p30 OS=Homo sapiens GN=RPP30 PE=1 SV=1 - [RPP30_HUMAN]	39.55	8	8	17	268	29.3027	8.90967	0.985255	0.988764	0.95793	0.977316	1.06714	0.976585	1.02864	1.02412	1.04789	0.169789
Q6NUM7	AGPAT5 protein (Fragment) OS=Homo sapiens GN=AGPAT5 PE=2 SV=1 - [Q6NUM7_HUMAN]	6.18	2	2	2	356	41.1384	9.1001	1.08382	1.01559		1.04971	0.867816	0.971048		0.919432	0.875895	0.169858
K7ERC8	3-ketodihydrosphingosine reductase (Fragment) OS=Homo sapiens GN=KDSR PE=1 SV=1 - [K7ERC8_HUMAN]	14.29	2	2	2	203	22.6055	7.79639	0.925585		1.08517	1.00538	1.22287		1.15388	1.18837	1.18202	0.169928
G3V238	Protein-lysine N-methyltransferase METTL10 OS=Homo sapiens GN=METTL10 PE=1 SV=1 - [G3V238_HUMAN]	15.38	1	1	2	104	11.3396	4.88135		1.0463	1.0232	1.03475		0.977449	1.00928	0.993366	0.960003	0.169991
O00425	Insulin-like growth factor 2 mRNA-binding protein 3 OS=Homo sapiens GN=IGF2BP3 PE=1 SV=2 - [IF2B3_HUMAN]	46.63	20	24	101	579	63.6656	8.86572	0.976913	0.989309	0.974574	0.980265	1.04433	0.981451	1.00907	1.01162	1.03198	0.170048
O14686	Histone-lysine N-methyltransferase 2D OS=Homo sapiens GN=KMT2D PE=1 SV=2 - [KMT2D_HUMAN]	0.43	2	2	2	5537	593.017	5.57959		1.06489	1.03299	1.04894		0.910026	0.995632	0.952829	0.908373	0.170049
Q9HBM1	Kinetochore protein Spc25 OS=Homo sapiens GN=SPC25 PE=1 SV=1 - [SPC25_HUMAN]	13.84	3	3	4	224	26.1365	8.00146	1.07715		1.35188	1.21451	0.922675		0.928585	0.92563	0.762142	0.170236
B2R673	Dihydrolipoamide acetyltransferase component of pyruvate dehydrogenase complex OS=Homo sapiens PE=2 SV=1 - [B2R673_HUMAN]	16.77	8	8	13	501	54.0128	8.76318	0.985765	0.987698	0.984559	0.986007	0.981183	1.03696	1.0248	1.01431	1.02871	0.170382
Q92643	GPI-anchor transamidase OS=Homo sapiens GN=PIGK PE=1 SV=2 - [GPI8_HUMAN]	15.44	4	4	14	395	45.2227	6.16357	1.06757	1.06832	1.14099	1.09229	1.05995	0.908586	1.04094	1.00316	0.918397	0.170844
P40939	Trifunctional enzyme subunit alpha, mitochondrial OS=Homo sapiens GN=HADHA PE=1 SV=2 - [ECHA_HUMAN]	42.73	27	27	185	763	82.9469	9.0415	0.972667	0.98866	1.02805	0.996459	1.0831	1.02671	1.01395	1.04125	1.04495	0.170889
B5LY71	Uridine monophosphate synthetase isoform I OS=Homo sapiens GN=UMPS PE=2 SV=1 - [B5LY71_HUMAN]	43.33	18	18	56	480	52.2436	7.23975	1.0046	1.01012	1.01411	1.00961	1.02418	1.01752	1.06882	1.03684	1.02697	0.170958
O60762	Dolichol-phosphate mannosyltransferase subunit 1 OS=Homo sapiens GN=DPM1 PE=1 SV=1 - [DPM1_HUMAN]	21.54	5	5	12	260	29.6158	9.56885	1.01818	0.988402	0.999863	1.00215	0.990264	1.10615	1.12565	1.07402	1.07172	0.171001
P25774	Cathepsin S OS=Homo sapiens GN=CTSS PE=1 SV=3 - [CATS_HUMAN]	19.94	6	6	15	331	37.4713	8.33838	0.977915	1.03464	1.03274	1.0151	0.972607	0.991412	0.984489	0.982836	0.968216	0.171522
B4DUJ0	cDNA FLJ60895, highly similar to Proteasome inhibitor PI31 subunit OS=Homo sapiens PE=2 SV=1 - [B4DUJ0_HUMAN]	20.77	3	3	3	183	20.1841	5.50342	1.16485		1.00591	1.08538	0.918316		0.920438	0.919377	0.847056	0.171959
Q8NGA1	Olfactory receptor 1M1 OS=Homo sapiens GN=OR1M1 PE=2 SV=1 - [OR1M1_HUMAN]	2.24	1	1	4	313	34.8163	8.90967	0.823396	1.08459	1.00112	0.969701	1.25432	1.02846	1.12954	1.13744	1.17298	0.172055
P36578	60S ribosomal protein L4 OS=Homo sapiens GN=RPL4 PE=1 SV=5 - [RL4_HUMAN]	48.95	20	21	167	427	47.6674	11.063	1.03277	1.12028	0.976347	1.04313	0.909607	0.872412	1.03076	0.937592	0.898823	0.172093
Q9NW13	RNA-binding protein 28 OS=Homo sapiens GN=RBM28 PE=1 SV=3 - [RBM28_HUMAN]	17.26	12	12	20	759	85.6847	9.21729	1.08449	1.22569	0.944157	1.08478	0.852012	0.740626	1.05287	0.881835	0.812916	0.172314
P82909	28S ribosomal protein S36, mitochondrial OS=Homo sapiens GN=MRPS36 PE=1 SV=2 - [RT36_HUMAN]	53.4	4	4	11	103	11.459	9.99365	0.965046	1.05118	0.986831	1.00102	1.1152	1.00021	1.12414	1.07985	1.07875	0.172689
B2R6U8	cDNA, FLJ93125, highly similar to Homo sapiens cleavage and polyadenylation specific factor 5, 25 kDa(CPSF5), mRNA OS=Homo sapiens PE=2 SV=1 - [B2R6U8_HUMAN]	42.29	10	10	34	227	26.1987	8.82178	1.00425	0.967695	0.938535	0.97016	1.0367	1.03896	0.975178	1.01695	1.04823	0.173011
Q562R1	Beta-actin-like protein 2 OS=Homo sapiens GN=ACTBL2 PE=1 SV=2 - [ACTBL_HUMAN]	19.95	2	6	288	376	41.976	5.59229	1.01986	1.04626	1.01605	1.02739	1.03936	1.04904	1.04301	1.0438	1.01597	0.173051
P53004	Biliverdin reductase A OS=Homo sapiens GN=BLVRA PE=1 SV=2 - [BIEA_HUMAN]	34.46	11	11	40	296	33.4073	6.44287	0.974992	1.00412	0.958745	0.979287	0.993651	1.01086	1.07977	1.02809	1.04984	0.173051
Q9HBQ7	Cathepsin L, isoform CRA_b OS=Homo sapiens GN=CTSL PE=2 SV=1 - [Q9HBQ7_HUMAN]	9.27	1	1	2	151	16.8277	4.57666		0.992269	1.06177	1.02702		0.905627	0.962128	0.933877	0.909309	0.173066
B3KUY5	cDNA FLJ40905 fis, clone UTERU2004664, highly similar to Conserved oligomeric Golgi complex component 1 OS=Homo sapiens PE=2 SV=1 - [B3KUY5_HUMAN]	15.66	10	10	19	894	99.2211	7.06396	0.988769	0.979626	0.960802	0.976399	0.993414	1.00198	1.08581	1.02707	1.05189	0.173123
P51116	Fragile X mental retardation syndrome-related protein 2 OS=Homo sapiens GN=FXR2 PE=1 SV=2 - [FXR2_HUMAN]	16.49	6	9	22	673	74.178	6.22705	0.945892	0.974726	1.01314	0.97792	1.12653	1.00528	1.01684	1.04955	1.07325	0.173161
P61923	Coatomer subunit zeta-1 OS=Homo sapiens GN=COPZ1 PE=1 SV=1 - [COPZ1_HUMAN]	31.64	4	4	14	177	20.1855	4.80518	1.00466	0.984251	1.17888	1.05593	0.955717	0.970202	0.930149	0.952023	0.901598	0.173655
B3KXF4	cDNA FLJ45324 fis, clone BRHIP3006449, highly similar to Catenin delta-2 OS=Homo sapiens PE=2 SV=1 - [B3KXF4_HUMAN]	1.26	1	1	3	792	87.1045	8.33838	1.02098	1.25847	1.20428	1.16124	0.846073	0.800566	1.16549	0.937375	0.80722	0.173707
E5KND7	Elongation factor G, mitochondrial OS=Homo sapiens GN=GFM1 PE=3 SV=1 - [E5KND7_HUMAN]	30.76	20	20	64	751	83.4325	7.00537	1.06681	1.03316	1.00818	1.03605	0.912994	0.988339	1.02402	0.975116	0.941186	0.173744
B7ZLE0	IBTK protein OS=Homo sapiens GN=IBTK PE=2 SV=1 - [B7ZLE0_HUMAN]	2.32	2	2	2	1338	148.887	7.6499	1.1138		1.04144	1.07762	0.911272		1.00262	0.956946	0.888016	0.174174
O95205	Muscleblind-like 2 (Drosophila), isoform CRA_b OS=Homo sapiens GN=MBLL PE=1 SV=1 - [O95205_HUMAN]	20.39	2	6	18	255	28.1222	8.85107	0.969122		0.868957	0.91904	1.01023		1.07726	1.04375	1.13569	0.174372
B3LEU8	TMEM214 protein (Fragment) OS=Homo sapiens GN=TMEM214 PE=2 SV=1 - [B3LEU8_HUMAN]	8.02	6	6	12	673	75.3915	8.98291	1.08954	0.954807	1.03347	1.02594	0.942165	0.985996	0.943614	0.957258	0.933054	0.174377
A8K8N7	Phosphoribosylformylglycinamidine synthase (FGAR amidotransferase), isoform CRA_b OS=Homo sapiens GN=PFAS PE=2 SV=1 - [A8K8N7_HUMAN]	8.59	9	9	27	1338	144.633	5.75732	0.983407	1.02118	0.99196	0.998848	1.052	1.01403	1.01457	1.02687	1.02805	0.174483
A0A0S2Z472	Protein kinase cAMP-dependent regulatory type II alpha isoform 1 (Fragment) OS=Homo sapiens GN=PRKAR2A PE=2 SV=1 - [A0A0S2Z472_HUMAN]	44.24	13	13	49	382	43.0397	5.08447	1.00178	0.98277	0.968198	0.98425	0.980102	1.04893	1.04243	1.02382	1.0402	0.174504
Q9BXY0	Protein MAK16 homolog OS=Homo sapiens GN=MAK16 PE=1 SV=2 - [MAK16_HUMAN]	18.33	5	5	7	300	35.3467	5.37646	1.05467	1.19349	0.99052	1.07956	0.81637	0.853079	1.07377	0.914408	0.84702	0.174818
Q9H147	Deoxynucleotidyltransferase terminal-interacting protein 1 OS=Homo sapiens GN=DNTTIP1 PE=1 SV=2 - [TDIF1_HUMAN]	8.21	2	2	7	329	36.9899	8.96826	1.08389	1.0998	0.988987	1.05756	0.916545	1.00182	1.02122	0.979859	0.926529	0.175249
A8K4K9	cDNA FLJ76169 OS=Homo sapiens PE=2 SV=1 - [A8K4K9_HUMAN]	26.94	6	6	15	297	34.8394	6.81494	1.03627	1.01422	1.00656	1.01902	0.94658	0.982377	1.0177	0.98222	0.963887	0.175436
M0R308	Phosphatidylinositol 3-kinase catalytic subunit type 3 (Fragment) OS=Homo sapiens GN=PIK3C3 PE=1 SV=1 - [M0R308_HUMAN]	15.85	2	2	2	183	20.4126	5.92236	0.994052		0.902657	0.948354	1.03696		1.1333	1.08513	1.14423	0.175576
P25788	Proteasome subunit alpha type-3 OS=Homo sapiens GN=PSMA3 PE=1 SV=2 - [PSA3_HUMAN]	32.16	10	10	56	255	28.4151	5.32568	1.00563	0.959065	0.904882	0.956524	0.974355	1.02863	1.1185	1.04049	1.08779	0.175858
B7Z6H4	DNA-directed RNA polymerase subunit OS=Homo sapiens PE=2 SV=1 - [B7Z6H4_HUMAN]	3.29	3	3	7	1369	153.412	8.48486	1.02282	1.08426	0.978246	1.02844	1.06849	1.09545	1.07758	1.08051	1.05062	0.176247
P14854	Cytochrome c oxidase subunit 6B1 OS=Homo sapiens GN=COX6B1 PE=1 SV=2 - [CX6B1_HUMAN]	66.28	5	5	22	86	10.1857	7.04932	0.947187	1.00216	1.00588	0.985075	1.09226	1.02025	1.00482	1.03911	1.05486	0.176406
C9J4K0	Ashwin OS=Homo sapiens GN=C2orf49 PE=1 SV=1 - [C9J4K0_HUMAN]	20.53	3	3	5	190	21.3433	9.67139	1.01756	0.918437	0.907721	0.947906	1.0035	0.984768	1.09096	1.02641	1.08281	0.176518
P46779	60S ribosomal protein L28 OS=Homo sapiens GN=RPL28 PE=1 SV=3 - [RL28_HUMAN]	44.53	8	8	43	137	15.7377	12.0151	1.01593	1.04247	0.978625	1.01234	0.813214	0.867061	1.02747	0.902583	0.891579	0.176532
B4DEA3	cDNA FLJ56531, highly similar to UV excision repair protein RAD23 homolog B OS=Homo sapiens PE=2 SV=1 - [B4DEA3_HUMAN]	22.33	7	9	26	403	42.2834	5.42725	1.03862	1.00964	0.998939	1.01573	0.995941	1.00034	0.991217	0.995833	0.980408	0.17658
A0A087WYF6	WASH complex subunit FAM21A OS=Homo sapiens GN=FAM21A PE=1 SV=1 - [A0A087WYF6_HUMAN]	5.38	5	5	8	1245	136.488	4.75439	1.08757	0.973625	1.01029	1.02383	0.9542	0.997206	0.926587	0.959331	0.937001	0.176698
B3KMN2	cDNA FLJ11695 fis, clone HEMBA1005019, highly similar to Homo sapiens SCC-112 protein (SCC-112), mRNA OS=Homo sapiens PE=2 SV=1 - [B3KMN2_HUMAN]	40.84	1	10	25	333	36.4385	8.74854	0.86149		0.971486	0.916488	1.39708		1.09496	1.24602	1.35956	0.176883
Q01105	Protein SET OS=Homo sapiens GN=SET PE=1 SV=3 - [SET_HUMAN]	37.59	2	9	58	290	33.4687	4.32275	0.976182	1.01551	0.949477	0.980391	1.07611	1.01039	1.00281	1.02977	1.05037	0.176911
B3KX06	cDNA FLJ44413 fis, clone UTERU1000337, highly similar to Ca(2+)/calmodulin-dependent protein kinase phosphatase (EC 3.1.3.16) OS=Homo sapiens PE=2 SV=1 - [B3KX06_HUMAN]	6.29	1	1	2	286	31.2868	5.92236	1.12844	1.01019		1.06932	0.944898	0.951055		0.947976	0.886525	0.176935
P62424	60S ribosomal protein L7a OS=Homo sapiens GN=RPL7A PE=1 SV=2 - [RL7A_HUMAN]	44.74	16	16	113	266	29.977	10.6089	1.05944	1.07203	1.02571	1.05239	0.910966	0.873293	1.06973	0.951328	0.903967	0.177085
C9JYN0	Synaptophysin-like protein 1 OS=Homo sapiens GN=SYPL1 PE=1 SV=1 - [C9JYN0_HUMAN]	16.52	1	3	14	224	24.7677	7.13721	0.951554		1.07177	1.01166	1.13874		1.13125	1.13499	1.12191	0.177132
P25786	Proteasome subunit alpha type-1 OS=Homo sapiens GN=PSMA1 PE=1 SV=1 - [PSA1_HUMAN]	55.13	15	15	89	263	29.5369	6.60986	1.01247	0.983797	0.871332	0.955867	1.00651	1.02814	1.05512	1.02992	1.07748	0.177481
B4DUF1	cDNA FLJ59760, highly similar to 1,4-alpha-glucan branching enzyme (EC 2.4.1.18) OS=Homo sapiens PE=2 SV=1 - [B4DUF1_HUMAN]	6.96	4	4	8	661	75.7983	6.52197	0.96702	1.11298	1.11161	1.06387	1.01398	0.969688	0.95526	0.979642	0.92083	0.177607
Q9BZX2	Uridine-cytidine kinase 2 OS=Homo sapiens GN=UCK2 PE=1 SV=1 - [UCK2_HUMAN]	18.77	4	4	9	261	29.2811	6.69775	1.1063	1.00606	0.993611	1.03532	0.795108	0.968692	0.991537	0.918446	0.887109	0.177676
Q9NX14	NADH dehydrogenase [ubiquinone] 1 beta subcomplex subunit 11, mitochondrial OS=Homo sapiens GN=NDUFB11 PE=1 SV=1 - [NDUBB_HUMAN]	19.61	2	2	7	153	17.3057	5.22412	1.09396	1.1345	0.980285	1.06958	0.973835	0.90396	1.03682	0.971538	0.908335	0.17771
A8K690	cDNA FLJ76863, highly similar to Homo sapiens stress-induced-phosphoprotein 1 (Hsp70/Hsp90-organizing protein) (STIP1), mRNA OS=Homo sapiens PE=2 SV=1 - [A8K690_HUMAN]	55.43	37	37	236	543	62.6154	6.80029	1.00546	0.945456	0.897782	0.949567	0.971121	1.0182	1.04544	1.01159	1.06531	0.177731
Q13472	DNA topoisomerase 3-alpha OS=Homo sapiens GN=TOP3A PE=1 SV=1 - [TOP3A_HUMAN]	2.7	2	2	3	1001	112.3	8.33838	0.930169	0.949578		0.939873	1.11618	1.00135		1.05877	1.1265	0.177921
E9PGE5	TBC1 domain family member 23 OS=Homo sapiens GN=TBC1D23 PE=1 SV=1 - [E9PGE5_HUMAN]	2.49	1	1	2	562	63.2464	5.85889	1.00786	0.964606		0.986231	1.05305	1.02481		1.03893	1.05344	0.178098
H7C1G1	Transmembrane protein 87B (Fragment) OS=Homo sapiens GN=TMEM87B PE=1 SV=1 - [H7C1G1_HUMAN]	12.5	1	1	4	112	13.1373	6.62451	0.911361	0.907428		0.909394	1.11629	0.980132		1.04821	1.15265	0.178397
Q9NPD8	Ubiquitin-conjugating enzyme E2 T OS=Homo sapiens GN=UBE2T PE=1 SV=1 - [UBE2T_HUMAN]	21.83	4	4	8	197	22.5066	7.98682	1.01597	0.94248	1.24661	1.06835	0.798931	1.04056	0.618509	0.819332	0.766912	0.178447
Q9H3R2	Mucin-13 OS=Homo sapiens GN=MUC13 PE=1 SV=3 - [MUC13_HUMAN]	5.86	2	2	2	512	54.5693	5.07178	1.02981	1.01149		1.02065	0.991259	1.00426		0.997761	0.977577	0.178512
Q9H2J4	Phosducin-like protein 3 OS=Homo sapiens GN=PDCL3 PE=1 SV=1 - [PDCL3_HUMAN]	28.45	7	7	17	239	27.5971	4.84326	1.0824	0.997316	1.01273	1.03082	0.918162	1.0314	0.91893	0.956164	0.92758	0.178647
P24666	Low molecular weight phosphotyrosine protein phosphatase OS=Homo sapiens GN=ACP1 PE=1 SV=3 - [PPAC_HUMAN]	41.77	6	6	28	158	18.0308	6.7417	1.01171	1.00537	0.945982	0.987686	1.00977	1.02161	1.04701	1.02613	1.03893	0.179195
Q8WXA9	Splicing regulatory glutamine/lysine-rich protein 1 OS=Homo sapiens GN=SREK1 PE=1 SV=1 - [SREK1_HUMAN]	13.98	5	5	9	508	59.345	10.3892	0.957617	1.02552	0.929468	0.970869	1.04215	0.98517	1.07072	1.03268	1.06366	0.179284
Q96JM3	Chromosome alignment-maintaining phosphoprotein 1 OS=Homo sapiens GN=CHAMP1 PE=1 SV=2 - [CHAP1_HUMAN]	12.68	8	8	17	812	89.0429	8.44092	0.945186	1.03859	0.847533	0.943769	1.06959	0.978978	1.11513	1.05457	1.1174	0.179288
A2A2V2	RNA-binding protein 34 (Fragment) OS=Homo sapiens GN=RBM34 PE=1 SV=1 - [A2A2V2_HUMAN]	15.2	5	5	6	408	45.8897	10.0815	1.08884	1.44412	0.922082	1.15168	0.845294	0.56375	1.0385	0.815849	0.708399	0.179431
H0UID5	AP complex subunit beta OS=Homo sapiens GN=AP2B1 PE=3 SV=1 - [H0UID5_HUMAN]	31.91	12	28	84	934	104.157	5.33838	0.983708	0.980397	1.17941	1.04784	0.94215	0.974032	0.878624	0.931602	0.889071	0.179437
B2ZGL7	Monoacylglycerol lipase isoform 2 OS=Homo sapiens GN=MGLL PE=2 SV=1 - [B2ZGL7_HUMAN]	10.62	2	2	4	273	30.0984	6.84424	0.951933	0.986914	0.960872	0.966573	1.06913	0.969848	1.0101	1.01636	1.05151	0.179981
E9PEQ6	Peptidyl-prolyl cis-trans isomerase OS=Homo sapiens GN=PPIE PE=1 SV=1 - [E9PEQ6_HUMAN]	20.4	5	6	17	250	27.6807	5.5415	0.967797	0.957253	0.959558	0.961536	0.958633	0.986861	0.995868	0.980454	1.01968	0.180124
P42224	Signal transducer and activator of transcription 1-alpha/beta OS=Homo sapiens GN=STAT1 PE=1 SV=2 - [STAT1_HUMAN]	17.87	13	13	30	750	87.2795	6.04932	0.97802	0.940507	0.993411	0.970646	0.987036	0.99709	1.01202	0.998715	1.02892	0.180144
Q06203	Amidophosphoribosyltransferase OS=Homo sapiens GN=PPAT PE=1 SV=1 - [PUR1_HUMAN]	18.76	9	9	18	517	57.3624	6.75635	1.02748	0.949417	0.853028	0.943308	0.964368	1.07881	1.12306	1.05541	1.11884	0.180272
P55011	Solute carrier family 12 member 2 OS=Homo sapiens GN=SLC12A2 PE=1 SV=1 - [S12A2_HUMAN]	19.64	20	20	58	1212	131.364	6.40479	1.13237	1.15876	0.967493	1.08621	0.79486	0.971342	1.03649	0.93423	0.860083	0.180349
B4DRG7	Condensin complex subunit 2 OS=Homo sapiens PE=2 SV=1 - [B4DRG7_HUMAN]	14.92	9	9	15	717	80.0792	5.021	1.04086	1.027	1.01407	1.02731	0.903629	1.03079	0.965066	0.966495	0.940803	0.180386
B4DDF4	Calponin OS=Homo sapiens GN=CNN2 PE=1 SV=1 - [B4DDF4_HUMAN]	34.56	7	8	22	298	32.5956	6.97607	0.988261	1.07451	1.08677	1.04985	0.992389	1.00241	1.00312	0.999306	0.951857	0.180443
Q6NZY4	Zinc finger CCHC domain-containing protein 8 OS=Homo sapiens GN=ZCCHC8 PE=1 SV=2 - [ZCHC8_HUMAN]	18.1	9	9	16	707	78.5285	4.86865	1.00005	1.00363	1.02831	1.01066	1.08756	1.10351	1.00124	1.06411	1.05288	0.180513
P49721	Proteasome subunit beta type-2 OS=Homo sapiens GN=PSMB2 PE=1 SV=1 - [PSB2_HUMAN]	31.84	6	6	17	201	22.8217	7.02002	1.00309	1.00286	0.906673	0.970872	1.00114	1.02425	1.09565	1.04035	1.07156	0.18057
E9PHH9	DNA-directed RNA polymerase III subunit RPC3 OS=Homo sapiens GN=POLR3C PE=1 SV=1 - [E9PHH9_HUMAN]	9.49	3	3	4	411	46.1597	7.76709	1.13448	1.12692		1.1307	0.793997	1.01696		0.905476	0.800811	0.180921
Q15126	Phosphomevalonate kinase OS=Homo sapiens GN=PMVK PE=1 SV=3 - [PMVK_HUMAN]	18.23	3	3	9	192	21.9812	5.73193	0.8884	0.98189	1.02469	0.964993	1.05325	1.04853	1.00329	1.03502	1.07257	0.180949
B3KM58	cDNA FLJ10358 fis, clone NT2RM2001238, highly similar to Glutaminase kidney isoform, mitochondrial (Fragment) OS=Homo sapiens PE=2 SV=1 - [B3KM58_HUMAN]	25.07	2	6	14	371	41.1091	6.45557	0.908887	0.800731	0.927848	0.879156	1.01128	1.04585	0.885202	0.980777	1.11559	0.18124
Q96JZ5	Transmembrane 9 superfamily member OS=Homo sapiens GN=SMBP PE=2 SV=1 - [Q96JZ5_HUMAN]	15.41	8	8	33	545	62.8994	7.54736	0.980385	1.00662	1.0096	0.99887	1.06598	1.04555	0.995761	1.03576	1.03694	0.181312
I3L2J8	Centrosomal protein of 131 kDa OS=Homo sapiens GN=CEP131 PE=1 SV=1 - [I3L2J8_HUMAN]	3.06	3	3	6	1047	117.627	8.77783	1.05387	1.12973	1.03162	1.07174	1.0213	1.0442	0.976057	1.01385	0.945986	0.181328
I3L1A4	NF-kappa-B inhibitor beta (Fragment) OS=Homo sapiens GN=NFKBIB PE=1 SV=1 - [I3L1A4_HUMAN]	24.16	3	3	6	149	16.4411	5.21143	1.01162	1.00249	0.962976	0.99236	1.0077	1.07532	1.01875	1.03392	1.04188	0.181372
B4DFL1	Dihydrolipoyl dehydrogenase OS=Homo sapiens PE=2 SV=1 - [B4DFL1_HUMAN]	25.93	11	11	53	459	48.8683	7.48877	0.976158	0.98904	0.871305	0.945501	1.04056	0.973457	1.02915	1.01439	1.07286	0.181642
P52272	Heterogeneous nuclear ribonucleoprotein M OS=Homo sapiens GN=HNRNPM PE=1 SV=3 - [HNRPM_HUMAN]	55.62	20	36	306	730	77.4643	8.70459	1.02502	0.998141	0.959863	0.99434	1.01009	1.0372	1.03721	1.02817	1.03402	0.181768
P31350	Ribonucleoside-diphosphate reductase subunit M2 OS=Homo sapiens GN=RRM2 PE=1 SV=1 - [RIR2_HUMAN]	48.59	13	16	53	389	44.8488	5.37646	1.04573	1.00201	1.16329	1.07034	0.955241	1.04583	0.844949	0.948672	0.886326	0.182117
B4DWS8	cDNA FLJ50902, moderately similar to Ras GTPase-activating protein 4 OS=Homo sapiens PE=2 SV=1 - [B4DWS8_HUMAN]	9.83	1	1	2	173	19.1937	7.43018		1.14953	1.09756	1.12355		0.916082	1.0473	0.981691	0.873741	0.182117
Q99598	Translin-associated protein X OS=Homo sapiens GN=TSNAX PE=1 SV=1 - [TSNAX_HUMAN]	44.14	11	11	26	290	33.0917	6.55127	0.97634	0.887093	0.911218	0.924884	0.918423	1.04683	1.08269	1.01598	1.0985	0.182438
Q9H267	Vacuolar protein sorting-associated protein 33B OS=Homo sapiens GN=VPS33B PE=1 SV=2 - [VP33B_HUMAN]	9.89	6	6	14	617	70.5404	6.7124	0.957809	0.935848	0.992764	0.96214	1.06539	0.984096	0.987927	1.01247	1.05231	0.182463
Q9NQX4	Unconventional myosin-Vc OS=Homo sapiens GN=MYO5C PE=1 SV=2 - [MYO5C_HUMAN]	2.24	3	3	6	1742	202.682	7.7085	1.07011	1.02717	1.02218	1.03982	0.976063	1.02318	1.0175	1.00558	0.967071	0.182578
Q9HC03	Dolichyl-phosphate beta-glucosyltransferase OS=Homo sapiens PE=2 SV=1 - [Q9HC03_HUMAN]	19.44	6	6	12	324	36.9403	9.27588	1.00133	1.02244	0.949764	0.99118	1.0012	1.07368	1.04431	1.03973	1.04899	0.182597
Q15031	Probable leucine--tRNA ligase, mitochondrial OS=Homo sapiens GN=LARS2 PE=1 SV=2 - [SYLM_HUMAN]	10.19	8	8	12	903	101.911	8.22119	0.950862	1.02753	0.958624	0.979007	1.08795	1.00464	1.01657	1.03639	1.05861	0.182718
B4DYY5	cDNA FLJ55671, highly similar to Ubiquitin-associated protein 2-like OS=Homo sapiens PE=2 SV=1 - [B4DYY5_HUMAN]	16.51	12	12	33	1078	113.491	6.68311	0.933596	0.938839	1.01459	0.962343	1.04948	1.01509	0.980898	1.01515	1.05488	0.182817
B2R983	cDNA, FLJ94267, highly similar to Homo sapiens glutathione S-transferase omega 1 (GSTO1), mRNA OS=Homo sapiens PE=2 SV=1 - [B2R983_HUMAN]	48.96	15	15	86	241	27.521	6.59521	0.968517	0.953477	1.03898	0.98699	1.04256	1.02141	1.0277	1.03056	1.04414	0.183042
Q7Z422	SUZ domain-containing protein 1 OS=Homo sapiens GN=SZRD1 PE=1 SV=1 - [SZRD1_HUMAN]	18.42	3	3	6	152	16.9869	8.95361	1.01446	0.943938	0.850603	0.936333	0.97486	1.06384	1.03105	1.02325	1.09283	0.183414
Q9Y376	Calcium-binding protein 39 OS=Homo sapiens GN=CAB39 PE=1 SV=1 - [CAB39_HUMAN]	43.4	14	14	46	341	39.8437	6.88818	0.960192	0.924901	1.04075	0.975281	1.0325	1.01711	1.04629	1.03197	1.05812	0.183629
D3DND1	CDV3 homolog (Mouse), isoform CRA_a OS=Homo sapiens GN=CDV3 PE=4 SV=1 - [D3DND1_HUMAN]	35.66	6	6	26	258	28.5815	9.43701	1.03984	0.926515	0.921341	0.962564	0.994698	1.04002	1.0625	1.03241	1.07256	0.183669
B4DN92	cDNA FLJ58594 OS=Homo sapiens PE=2 SV=1 - [B4DN92_HUMAN]	5.65	3	3	4	531	61.2787	7.35693		0.945141	1.01536	0.980248		1.12287	1.04579	1.08433	1.10618	0.18398
Q9Y5A9	YTH domain-containing family protein 2 OS=Homo sapiens GN=YTHDF2 PE=1 SV=2 - [YTHD2_HUMAN]	11.57	4	7	19	579	62.2957	8.79248	1.055	0.951244	0.99953	1.00192	0.833333	1.00046	0.897024	0.910274	0.908527	0.184265
O76024	Wolframin OS=Homo sapiens GN=WFS1 PE=1 SV=2 - [WFS1_HUMAN]	3.03	2	2	2	890	100.227	8.04541	0.971689		1.01243	0.992058	0.884774		0.948519	0.916646	0.923984	0.184364
Q6IAQ2	SDHC protein OS=Homo sapiens GN=SDHC PE=2 SV=1 - [Q6IAQ2_HUMAN]	11.24	1	2	7	169	18.5899	9.68604	0.972941	1.02133	0.938129	0.977466	1.06166	1.00133	1.25497	1.10599	1.13149	0.184365
Q7Z3N1	Putative uncharacterized protein DKFZp686A04130 OS=Homo sapiens GN=DKFZp686A04130 PE=2 SV=1 - [Q7Z3N1_HUMAN]	4.11	1	3	6	681	75.3538	6.771		0.97346	1.06772	1.02059		0.939223	0.878389	0.908806	0.890471	0.184483
B2R894	Mitochondrial ribosomal protein L38, isoform CRA_b OS=Homo sapiens GN=MRPL38 PE=1 SV=1 - [B2R894_HUMAN]	19.65	6	6	15	346	40.7314	6.66846	0.974585	0.995056	1.06861	1.01275	1.10665	1.03937	1.05939	1.06847	1.05502	0.18484
A0A0G2JRG8	Rho GTPase-activating protein 27 OS=Homo sapiens GN=ARHGAP27 PE=1 SV=1 - [A0A0G2JRG8_HUMAN]	7.61	4	4	4	867	96.131	5.84619	1.08496	0.984401	1.06002	1.04313	0.996158	0.979709	0.758709	0.911525	0.873839	0.185095
B2R7M1	cDNA, FLJ93507, highly similar to Homo sapiens ATPase, H+ transporting, lysosomal 38kDa, V0 subunit d isoform 1 (ATP6V0D1), mRNA OS=Homo sapiens PE=2 SV=1 - [B2R7M1_HUMAN]	19.66	6	6	16	351	40.2912	4.99561	1.00023	1.1212	1.05295	1.05812	1.01419	0.934788	1.01465	0.987876	0.93361	0.18514
P48506	Glutamate--cysteine ligase catalytic subunit OS=Homo sapiens GN=GCLC PE=1 SV=2 - [GSH1_HUMAN]	39.72	20	21	87	637	72.7193	6.0874	0.847775	0.859282	0.97311	0.893389	1.15498	0.962748	0.940843	1.01952	1.14119	0.185187
P18858	DNA ligase 1 OS=Homo sapiens GN=LIG1 PE=1 SV=1 - [DNLI1_HUMAN]	11.43	8	9	16	919	101.673	5.61768	1.05245	0.990778	1.14828	1.06384	1.00198	1.00447	0.821942	0.942798	0.886225	0.185726
B3KM88	cDNA FLJ10527 fis, clone NT2RP2000932, highly similar to Ankyrin repeat and MYND domain-containing protein 2 OS=Homo sapiens PE=2 SV=1 - [B3KM88_HUMAN]	16.55	7	7	13	441	49.3087	6.25244	1.0445	0.957107	1.0606	1.02074	0.979376	0.98157	0.917189	0.959378	0.939887	0.185853
A0A024RAB6	Heparan sulfate proteoglycan 2 (Perlecan), isoform CRA_b OS=Homo sapiens GN=HSPG2 PE=4 SV=1 - [A0A024RAB6_HUMAN]	8.97	31	31	50	4346	463.723	6.50732	0.941374	1.09776	1.25753	1.09889	1.06194	0.8479	0.81261	0.907485	0.825819	0.18591
Q9Y499	Homo sapiens clone 23742 (Fragment) OS=Homo sapiens PE=2 SV=1 - [Q9Y499_HUMAN]	13.64	2	2	7	154	17.7616	6.68311	0.965385	1.08443	1.25716	1.10232	1.05435	0.918351	0.741933	0.904878	0.820882	0.186278
Q9UBS4	DnaJ homolog subfamily B member 11 OS=Homo sapiens GN=DNAJB11 PE=1 SV=1 - [DJB11_HUMAN]	35.2	11	11	35	358	40.4886	6.17627	0.989237	1.01456	0.965057	0.989617	1.02544	1.00519	1.01216	1.01427	1.02491	0.186429
Q8N201	Integrator complex subunit 1 OS=Homo sapiens GN=INTS1 PE=1 SV=2 - [INT1_HUMAN]	5.94	10	10	15	2190	244.143	6.12549	1.02248	1.05644	1.14668	1.0752	0.999736	0.952184	1.05057	1.00083	0.930829	0.186441
Q9UBT2	SUMO-activating enzyme subunit 2 OS=Homo sapiens GN=UBA2 PE=1 SV=2 - [SAE2_HUMAN]	33.13	18	18	31	640	71.1792	5.2876	1.02338	0.971143	0.922653	0.972393	1.00752	1.08277	1.00941	1.03323	1.06257	0.1865
B3KM35	cDNA FLJ10144 fis, clone HEMBA1003286, highly similar to Beta-1,4-galactosyltransferase 4 (EC 2.4.1.-) OS=Homo sapiens PE=2 SV=1 - [B3KM35_HUMAN]	11.92	3	3	5	344	39.9876	9.0708	0.971725	0.941551	1.02721	0.980162	0.906066	0.891199	0.973298	0.923521	0.942213	0.186778
B2R6K4	cDNA, FLJ92996, highly similar to Homo sapiens guanine nucleotide binding protein (G protein), beta polypeptide 1 (GNB1), mRNA OS=Homo sapiens PE=2 SV=1 - [B2R6K4_HUMAN]	34.12	3	9	37	340	37.277	6.17627	1.01569	1.07982	1.10134	1.06562	1.05009	1.00677	0.919848	0.992234	0.931134	0.186865
B4DP28	cDNA FLJ51260, highly similar to DNA polymerase subunit delta 2 (EC 2.7.7.7) OS=Homo sapiens PE=2 SV=1 - [B4DP28_HUMAN]	19.54	7	7	17	435	47.1419	5.14795	1.02031	1.03226	0.964907	1.00583	0.94938	0.995548	0.94922	0.964716	0.959128	0.186947
B4DKP8	cDNA FLJ52317, highly similar to tRNA-dihydrouridine synthase 2-like (EC 1.-.-.-) OS=Homo sapiens PE=2 SV=1 - [B4DKP8_HUMAN]	8.52	3	3	3	458	51.3454	7.32764	1.01242	1.00139		1.00691	0.956579	0.989231		0.972905	0.966233	0.187216
E5KN59	Peptidyl-prolyl cis-trans isomerase D OS=Homo sapiens PE=4 SV=1 - [E5KN59_HUMAN]	39.73	15	16	38	370	40.7379	7.21045	1.01558	0.970928	0.964896	0.9838	1.00755	1.07746	1.00368	1.02956	1.04652	0.187473
Q9BU61	NADH dehydrogenase [ubiquinone] 1 alpha subcomplex assembly factor 3 OS=Homo sapiens GN=NDUFAF3 PE=1 SV=1 - [NDUF3_HUMAN]	13.59	2	2	2	184	20.3374	8.22119	1.10914		0.93762	1.02338	0.790894		0.877302	0.834098	0.815044	0.187491
Q9UHN6	Transmembrane protein 2 OS=Homo sapiens GN=TMEM2 PE=1 SV=1 - [TMEM2_HUMAN]	7.59	8	9	12	1383	154.276	8.14795	0.99416	1.03006	1.06937	1.0312	0.995324	1.00365	0.989257	0.996078	0.965945	0.187511
Q14692	Ribosome biogenesis protein BMS1 homolog OS=Homo sapiens GN=BMS1 PE=1 SV=1 - [BMS1_HUMAN]	6.16	7	7	10	1282	145.716	6.44287	1.1757	1.24165	0.861667	1.093	0.711685	0.697795	1.06763	0.825703	0.755444	0.18783
Q3MHD2	Protein LSM12 homolog OS=Homo sapiens GN=LSM12 PE=1 SV=2 - [LSM12_HUMAN]	22.56	4	4	17	195	21.6871	7.73779	1.00443	0.990949	0.981373	0.992249	0.995166	1.0117	1.01057	1.00581	1.01367	0.188013
J3QS03	Twisted gastrulation protein homolog 1 OS=Homo sapiens GN=TWSG1 PE=1 SV=1 - [J3QS03_HUMAN]	8.15	1	1	2	184	20.3515	5.23682		1.15282	1.04912	1.10097		0.870579	1.00205	0.936314	0.850442	0.188108
Q9Y5Z4	Heme-binding protein 2 OS=Homo sapiens GN=HEBP2 PE=1 SV=1 - [HEBP2_HUMAN]	32.68	6	6	24	205	22.8612	4.62744	0.973146	1.02116	0.884588	0.959633	1.0398	0.987049	1.08416	1.037	1.08062	0.188524
Q9UES0	SNARE protein Ykt6 (Fragment) OS=Homo sapiens PE=2 SV=1 - [Q9UES0_HUMAN]	53.93	10	10	29	191	21.5931	6.55127	1.00117	0.964863	0.934663	0.9669	0.958157	1.06652	1.12192	1.04887	1.08477	0.188688
Q14108	Lysosome membrane protein 2 OS=Homo sapiens GN=SCARB2 PE=1 SV=2 - [SCRB2_HUMAN]	19.25	8	8	28	478	54.2555	5.13525	0.966374	0.991187	0.915609	0.957723	0.989128	0.981234	1.03536	1.00191	1.04614	0.188726
A0A0S2Z3D2	BCL2-like 1 isoform 3 OS=Homo sapiens GN=BCL2L1 PE=2 SV=1 - [A0A0S2Z3D2_HUMAN]	21.85	3	3	8	151	16.693	4.99561	0.992662	0.971278	1.09876	1.0209	0.94488	0.97211	0.954952	0.957314	0.937715	0.188962
Q13867	Bleomycin hydrolase OS=Homo sapiens GN=BLMH PE=1 SV=1 - [BLMH_HUMAN]	29.23	11	11	38	455	52.528	6.26514	0.970145	0.953585	1.0205	0.981408	1.03261	1.044	0.990429	1.02235	1.04171	0.188982
B4DL06	cDNA FLJ59565, highly similar to Beta-catenin OS=Homo sapiens PE=2 SV=1 - [B4DL06_HUMAN]	39.92	18	24	118	739	80.775	6.0874	1.00585	1.03413	1.03228	1.02409	0.944084	0.982667	1.02567	0.984139	0.960992	0.189092
B3KS28	cDNA FLJ35355 fis, clone PUAEN2000152, moderately similar to N-terminal acetyltransferase C complexcatalytic subunit MAK3 (EC 2.3.1.88) OS=Homo sapiens PE=2 SV=1 - [B3KS28_HUMAN]	11.33	3	3	3	362	39.2186	5.51611		0.986657	0.880449	0.933553		1.02316	1.07908	1.05112	1.12593	0.189212
P07954	Fumarate hydratase, mitochondrial OS=Homo sapiens GN=FH PE=1 SV=3 - [FUMH_HUMAN]	31.96	13	13	70	510	54.6022	8.76318	1.0203	0.995767	0.939154	0.985073	1.00024	1.03549	1.05982	1.03185	1.04748	0.189264
H0Y4F4	Sentrin-specific protease 6 (Fragment) OS=Homo sapiens GN=SENP6 PE=1 SV=1 - [H0Y4F4_HUMAN]	4.81	2	2	2	582	65.6598	7.38623	0.995995	0.99656		0.996277	0.967734	0.907862		0.937798	0.941302	0.189994
B0FTY2	NudC-like protein OS=Homo sapiens PE=1 SV=1 - [B0FTY2_HUMAN]	21.33	6	6	21	361	40.7536	5.19873	0.998371	1.02996	1.09538	1.04124	1.03609	0.946611	0.836469	0.939722	0.902505	0.190126
Q15007	Pre-mRNA-splicing regulator WTAP OS=Homo sapiens GN=WTAP PE=1 SV=2 - [FL2D_HUMAN]	18.43	5	5	10	396	44.2167	5.18604	0.997624	0.956162	0.932075	0.961954	1.08426	0.977831	1.00114	1.02108	1.06146	0.190446
B4DVP2	cDNA FLJ57208, highly similar to 5'-AMP-activated protein kinase subunit beta-1 OS=Homo sapiens PE=2 SV=1 - [B4DVP2_HUMAN]	15.02	2	2	4	233	26.4073	5.73193	0.936675	1.06088	0.749603	0.915718	1.18371	0.940966	1.21245	1.11238	1.21476	0.190462
Q96TC7	Regulator of microtubule dynamics protein 3 OS=Homo sapiens GN=RMDN3 PE=1 SV=2 - [RMD3_HUMAN]	13.4	5	5	8	470	52.086	5.09717	0.782104	1.02696	0.962736	0.923934	1.2165	1.0334	0.995083	1.08166	1.17071	0.190582
B7Z5J7	cDNA FLJ58682, highly similar to Vesicle-fusing ATPase (EC 3.6.4.6) OS=Homo sapiens PE=2 SV=1 - [B7Z5J7_HUMAN]	34.24	22	23	79	739	82.0059	6.81494	0.978431	0.990586	1.00648	0.991832	1.08609	1.00868	1.00854	1.03444	1.04296	0.190691
Q12789	General transcription factor 3C polypeptide 1 OS=Homo sapiens GN=GTF3C1 PE=1 SV=4 - [TF3C1_HUMAN]	9.77	16	16	30	2109	238.725	7.29834	1.00966	0.99983	0.975102	0.994864	1.0017	1.01476	1.03981	1.01876	1.02402	0.19081
Q5JPE7	Nodal modulator 2 OS=Homo sapiens GN=NOMO2 PE=1 SV=1 - [NOMO2_HUMAN]	29.83	27	27	91	1267	139.351	5.75732	0.981582	1.03315	1.12579	1.04684	1.03611	0.922461	0.902756	0.953776	0.911101	0.191166
P30040	Endoplasmic reticulum resident protein 29 OS=Homo sapiens GN=ERP29 PE=1 SV=4 - [ERP29_HUMAN]	50.19	12	12	68	261	28.9752	7.31299	1.01143	0.992616	0.904729	0.969592	0.997159	1.04818	1.03414	1.02649	1.05868	0.191413
Q5QPD4	Aurora kinase A (Fragment) OS=Homo sapiens GN=AURKA PE=1 SV=1 - [Q5QPD4_HUMAN]	5.9	1	1	2	271	30.6633	9.75928		1.03806	1.07835	1.05821		0.847532	0.98691	0.917221	0.86677	0.191419
B4DS83	cDNA FLJ53179, highly similar to Nucleolar protein 10 OS=Homo sapiens PE=2 SV=1 - [B4DS83_HUMAN]	7.68	4	4	9	638	74.3662	8.11865	1.1225	1.04176	0.981836	1.0487	0.833025	0.857906	1.06253	0.917821	0.875199	0.191467
B4DK45	cDNA FLJ52552, highly similar to WD repeat protein 6 OS=Homo sapiens PE=2 SV=1 - [B4DK45_HUMAN]	10.27	2	2	3	370	39.9593	6.44287		1.09015	1.00248	1.04632		0.970147	0.94573	0.957939	0.915534	0.191587
A8K0J3	cDNA FLJ76732, highly similar to Homo sapiens TAO kinase 3 (TAOK3), mRNA OS=Homo sapiens PE=2 SV=1 - [A8K0J3_HUMAN]	3.12	2	3	4	898	105.265	7.37158	1.01108		0.985831	0.998455	0.902734		0.964529	0.933631	0.935076	0.191604
P42766	60S ribosomal protein L35 OS=Homo sapiens GN=RPL35 PE=1 SV=2 - [RL35_HUMAN]	40.65	7	8	47	123	14.5426	11.0483	1.07136	1.12431	0.97785	1.05784	0.891925	0.823365	1.06493	0.92674	0.876068	0.192171
A8K8F0	cDNA FLJ76436 OS=Homo sapiens PE=2 SV=1 - [A8K8F0_HUMAN]	55.37	3	16	81	298	33.1936	5.60498	1.06044	0.959516	0.919479	0.979813	0.995929	1.0883	1.11556	1.0666	1.08857	0.192303
Q96DB5	Regulator of microtubule dynamics protein 1 OS=Homo sapiens GN=RMDN1 PE=1 SV=1 - [RMD1_HUMAN]	13.69	4	4	7	314	35.7854	8.49951	0.868361	1.01537	0.980891	0.954874	1.14573	0.994622	1.02507	1.05514	1.10501	0.192391
Q12768	WASH complex subunit strumpellin OS=Homo sapiens GN=KIAA0196 PE=1 SV=1 - [STRUM_HUMAN]	9.92	9	9	16	1159	134.201	6.97607	0.949844	0.998192	0.949382	0.965806	1.13329	0.983975	1.00965	1.04231	1.07921	0.192426
A6H8X9	Centrosomal protein 170kDa OS=Homo sapiens GN=CEP170 PE=2 SV=1 - [A6H8X9_HUMAN]	2.88	3	3	5	1460	161.34	7.00537	1.01232	0.957047	0.805694	0.925019	0.972631	1.03198	1.14751	1.05071	1.13588	0.192643
F8W950	Aminoacyl tRNA synthase complex-interacting multifunctional protein 2 OS=Homo sapiens GN=AIMP2 PE=1 SV=1 - [F8W950_HUMAN]	43.82	10	10	52	251	27.7914	9.31982	0.957418	1.00636	0.888826	0.950867	1.00379	1.00442	1.00436	1.00419	1.05608	0.192778
P60981	Destrin OS=Homo sapiens GN=DSTN PE=1 SV=3 - [DEST_HUMAN]	41.82	10	11	60	165	18.4935	7.85498	1.0158	0.927191	0.898205	0.947065	0.95598	1.04579	1.07753	1.02643	1.0838	0.19291
Q9NQ88	Fructose-2,6-bisphosphatase TIGAR OS=Homo sapiens GN=TIGAR PE=1 SV=1 - [TIGAR_HUMAN]	31.85	6	6	13	270	30.0431	7.69385	1.06062	0.944348	0.766803	0.923923	0.948568	1.15843	1.2227	1.1099	1.20129	0.192982
P22061	Protein-L-isoaspartate(D-aspartate) O-methyltransferase OS=Homo sapiens GN=PCMT1 PE=1 SV=4 - [PIMT_HUMAN]	51.98	11	11	31	227	24.6206	7.21045	0.963967	0.95572	0.969347	0.963011	1.16618	1.02671	0.970065	1.05432	1.09481	0.193024
Q9ULU4	Protein kinase C-binding protein 1 OS=Homo sapiens GN=ZMYND8 PE=1 SV=2 - [PKCB1_HUMAN]	8.85	9	9	17	1186	131.61	7.1958	1.03084	1.01107	1.01979	1.02057	0.981429	1.02557	0.978232	0.995077	0.975023	0.19311
Q8NCF5	NFATC2-interacting protein OS=Homo sapiens GN=NFATC2IP PE=1 SV=1 - [NF2IP_HUMAN]	12.17	4	4	12	419	45.7888	6.59521	0.984732	0.989489	1.02685	1.00036	1.003	1.11987	1.0493	1.05739	1.05701	0.193144
M0R009	Alpha-1B-glycoprotein (Fragment) OS=Homo sapiens GN=A1BG PE=1 SV=8 - [M0R009_HUMAN]	2.3	1	1	2	305	33.3207	6.26514	0.854096		0.856976	0.855536	0.90592		1.01405	0.959984	1.12208	0.19319
P20042	Eukaryotic translation initiation factor 2 subunit 2 OS=Homo sapiens GN=EIF2S2 PE=1 SV=2 - [IF2B_HUMAN]	48.65	15	15	62	333	38.3644	5.79541	1.0253	0.937792	0.913414	0.958835	0.967809	1.06191	1.06419	1.0313	1.07558	0.194125
B3KRB7	Inhibitor of kappa light polypeptide gene enhancer in B-cells, kinase beta, isoform CRA_a OS=Homo sapiens GN=IKBKB PE=2 SV=1 - [B3KRB7_HUMAN]	4.69	2	2	3	533	60.7809	5.57959	0.796593		0.764399	0.780496	1.46954		0.999065	1.2343	1.58143	0.194157
B2R7N6	Amino acid transporter OS=Homo sapiens PE=2 SV=1 - [B2R7N6_HUMAN]	7.33	3	3	3	532	55.6576	6.25244	1.07996		1.0523	1.06613	0.856642		0.998167	0.927405	0.86988	0.194245
O75368	SH3 domain-binding glutamic acid-rich-like protein OS=Homo sapiens GN=SH3BGRL PE=1 SV=1 - [SH3L1_HUMAN]	61.4	7	7	33	114	12.7664	5.24951	1.00479	0.963977	0.991205	0.986658	1.06456	0.997264	1.00979	1.02387	1.03772	0.194351
O60568	Procollagen-lysine,2-oxoglutarate 5-dioxygenase 3 OS=Homo sapiens GN=PLOD3 PE=1 SV=1 - [PLOD3_HUMAN]	8.67	6	6	10	738	84.7315	6.04932	0.989747	0.992793	1.00215	0.994895	0.955564	0.997021	0.900802	0.951129	0.956009	0.194507
J3KRA9	Serine/threonine-protein kinase SMG1 (Fragment) OS=Homo sapiens GN=SMG1 PE=1 SV=1 - [J3KRA9_HUMAN]	1.72	4	4	6	3551	398.588	6.32861	0.943484	1.00855	0.926853	0.959629	1.08592	0.946768	1.11552	1.0494	1.09355	0.194642
Q99584	Protein S100-A13 OS=Homo sapiens GN=S100A13 PE=1 SV=1 - [S10AD_HUMAN]	47.96	5	5	21	98	11.4641	6.16357	0.957743	0.93746	0.97936	0.958188	1.07399	1.02595	0.950986	1.01698	1.06135	0.194675
Q3SYF1	Sorting nexin 12 OS=Homo sapiens GN=SNX12 PE=2 SV=1 - [Q3SYF1_HUMAN]	35.8	4	6	14	162	18.8727	8.44092	0.933047	1.03029	1.03692	1.00009	0.983721	0.916258	0.907379	0.935786	0.935706	0.194752
A8YQF4	MHC class I antigen (Fragment) OS=Homo sapiens GN=HLA-C PE=3 SV=1 - [A8YQF4_HUMAN]	20.99	1	5	14	343	38.3979	6.46826	1.06865	1.04411		1.05638	0.949346	0.719197		0.834271	0.789745	0.194949
Q9UNX4	WD repeat-containing protein 3 OS=Homo sapiens GN=WDR3 PE=1 SV=1 - [WDR3_HUMAN]	10.5	8	8	17	943	106.032	6.63916	1.07348	1.05079	0.999439	1.04124	0.849181	0.912373	1.05727	0.939609	0.902398	0.195022
Q86Y37	CDK2-associated and cullin domain-containing protein 1 OS=Homo sapiens GN=CACUL1 PE=1 SV=1 - [CACL1_HUMAN]	15.45	4	4	8	369	41.0374	5.18604	0.74768	0.916516	0.960271	0.874822	1.28934	0.950615	0.975654	1.07187	1.22524	0.195131
Q9H0U4	Ras-related protein Rab-1B OS=Homo sapiens GN=RAB1B PE=1 SV=1 - [RAB1B_HUMAN]	65.17	5	12	169	201	22.1572	5.73193	0.942792	1.02961	0.933584	0.968663	1.02348	0.992828	1.0551	1.0238	1.05692	0.195145
P49454	Centromere protein F OS=Homo sapiens GN=CENPF PE=1 SV=2 - [CENPF_HUMAN]	1.87	5	5	5	3210	367.537	5.07178	1.00837	1.09171	1.13944	1.07984	1.03654	1.01694	0.826068	0.959849	0.888881	0.195488
Q68CS2	Putative uncharacterized protein DKFZp781P1796 OS=Homo sapiens GN=DKFZp781P1796 PE=2 SV=1 - [Q68CS2_HUMAN]	5.81	3	3	3	620	68.6426	7.41553	0.837516	0.972979		0.905247	1.07839	1.01687		1.04763	1.15729	0.195719
Q68D16	Putative uncharacterized protein DKFZp686D0638 (Fragment) OS=Homo sapiens GN=DKFZp686D0638 PE=2 SV=1 - [Q68D16_HUMAN]	12.89	2	5	12	388	43.4596	8.25049	0.96816	0.975035	1.39601	1.11307	0.884128	0.949358	0.826966	0.886818	0.796733	0.195748
B2R7D7	cDNA, FLJ93394, highly similar to Homo sapiens anterior gradient 2 homolog (Xenopus laevis) (AGR2), mRNA OS=Homo sapiens PE=2 SV=1 - [B2R7D7_HUMAN]	64	7	8	263	175	19.9946	9.01221	1.00855	1.09986	1.07447	1.06096	0.990578	0.9746	1.05108	1.00542	0.947653	0.19596
B7Z6I3	DNA ligase OS=Homo sapiens PE=2 SV=1 - [B7Z6I3_HUMAN]	17.21	11	11	18	738	82.27	8.57275	1.02623	1.03533	1.00836	1.02331	0.953337	1.00143	1.01791	0.990891	0.96832	0.196278
Q6IPN0	Reticulon OS=Homo sapiens GN=RTN4 PE=2 SV=1 - [Q6IPN0_HUMAN]	43.44	4	9	44	343	36.8953	4.80518	0.893404	0.997371	0.930084	0.940286	1.24232	1.00332	0.985277	1.07697	1.14537	0.196357
P34932	Heat shock 70 kDa protein 4 OS=Homo sapiens GN=HSPA4 PE=1 SV=4 - [HSP74_HUMAN]	58.69	41	45	238	840	94.2712	5.18604	1.00613	0.949126	0.916712	0.957324	0.962711	1.03254	1.05044	1.01523	1.06049	0.196556
Q9NX62	Inositol monophosphatase 3 OS=Homo sapiens GN=IMPAD1 PE=1 SV=1 - [IMPA3_HUMAN]	11.7	6	6	10	359	38.657	6.85889	0.994491	1.05889	0.970681	1.00802	0.980667	0.895175	0.972339	0.949394	0.94184	0.196601
Q96IX5	Up-regulated during skeletal muscle growth protein 5 OS=Homo sapiens GN=USMG5 PE=1 SV=1 - [USMG5_HUMAN]	53.45	3	3	8	58	6.45337	9.75928	1.04415	0.961981	1.05734	1.02116	0.985177	0.978914	0.954274	0.972788	0.952632	0.197011
R9WWI7	SEC62 splice variant OS=Homo sapiens PE=2 SV=1 - [R9WWI7_HUMAN]	33.18	8	8	21	220	25.802	8.45557	1.11477	1.00791	0.947508	1.0234	0.872256	0.971071	0.958287	0.933871	0.91252	0.197042
P41214	Eukaryotic translation initiation factor 2D OS=Homo sapiens GN=EIF2D PE=1 SV=3 - [EIF2D_HUMAN]	15.92	6	6	13	584	64.6655	7.6499	0.947815	1.02134	0.981991	0.983716	1.10791	0.995916	1.02966	1.04449	1.06178	0.197696
Q5QJE6	Deoxynucleotidyltransferase terminal-interacting protein 2 OS=Homo sapiens GN=DNTTIP2 PE=1 SV=2 - [TDIF2_HUMAN]	11.9	7	7	14	756	84.4179	6.16357	1.18905	1.09399	0.918865	1.0673	0.771752	0.892205	1.03257	0.898843	0.842163	0.198029
B4DMQ7	Tumor protein p53 inducible protein 3, isoform CRA_c OS=Homo sapiens GN=TP53I3 PE=2 SV=1 - [B4DMQ7_HUMAN]	20.16	4	4	8	243	26.816	9.12939	0.871788	0.9795	1.0029	0.951397	1.18668	0.976089	1.03606	1.06628	1.12075	0.198055
Q9UKL0	REST corepressor 1 OS=Homo sapiens GN=RCOR1 PE=1 SV=1 - [RCOR1_HUMAN]	16.6	7	7	11	482	52.9955	7.03467	1.02543	0.959534	1.16064	1.04854	0.983381	0.974765	0.822275	0.926807	0.883906	0.198217
Q96J01	THO complex subunit 3 OS=Homo sapiens GN=THOC3 PE=1 SV=1 - [THOC3_HUMAN]	16.24	6	6	18	351	38.7468	6.0874	1.04881	1.03595	0.949787	1.01151	0.933855	0.972554	0.972606	0.959672	0.948747	0.198354
C9JZG2	Trifunctional purine biosynthetic protein adenosine-3 (Fragment) OS=Homo sapiens GN=GART PE=1 SV=1 - [C9JZG2_HUMAN]	52.21	1	6	25	136	14.4514	8.49951	0.917834	0.98219	0.948002	0.949342	1.29289	1.1245	0.926709	1.1147	1.17418	0.198624
A1L390	Pleckstrin homology domain-containing family G member 3 OS=Homo sapiens GN=PLEKHG3 PE=1 SV=1 - [PKHG3_HUMAN]	3.61	3	3	4	1219	134.329	6.55127	0.950992	0.981863	1.07408	1.00231	0.941543	0.923696	0.963129	0.942789	0.940614	0.198785
F8W8H5	Ras-related protein Rab-24 OS=Homo sapiens GN=RAB24 PE=1 SV=1 - [F8W8H5_HUMAN]	22.99	3	3	6	174	19.6586	5.42725	0.998786	1.03816	1.06711	1.03468	1.02729	0.98757	0.929449	0.981438	0.94854	0.198978
Q6PGP7	Tetratricopeptide repeat protein 37 OS=Homo sapiens GN=TTC37 PE=1 SV=1 - [TTC37_HUMAN]	7.61	10	10	20	1564	175.375	7.53271	0.954745	0.98488	0.93032	0.956648	1.04373	0.948422	1.0371	1.00975	1.05551	0.198997
B4E2X3	cDNA FLJ56024 OS=Homo sapiens PE=2 SV=1 - [B4E2X3_HUMAN]	10.89	7	7	15	698	78.6375	6.72705	0.950761	1.00234	1.03949	0.997529	1.10614	1.0113	1.04894	1.05546	1.05807	0.199313
B4DFY5	Mitogen-activated protein kinase kinase 1, isoform CRA_d OS=Homo sapiens GN=MAP2K1 PE=2 SV=1 - [B4DFY5_HUMAN]	24.53	5	10	36	371	41.3523	6.62451	0.934638	0.981255	0.966887	0.960926	1.05626	0.975425	0.984706	1.00546	1.04635	0.199656
Q15651	High mobility group nucleosome-binding domain-containing protein 3 OS=Homo sapiens GN=HMGN3 PE=1 SV=2 - [HMGN3_HUMAN]	9.09	2	2	3	99	10.6595	9.65674	0.967698	1.06342	0.845869	0.958996	1.04445	1.05455	1.06945	1.05615	1.10131	0.200019
A0A140T8Z0	Protein diaphanous homolog 1 OS=Homo sapiens GN=DIAPH1 PE=1 SV=1 - [A0A140T8Z0_HUMAN]	25.57	32	34	107	1263	140.211	5.38916	0.982153	0.988616	0.982598	0.984456	0.978249	1.02201	1.01804	1.0061	1.02198	0.200279
Q8N442	Translation factor GUF1, mitochondrial OS=Homo sapiens GN=GUF1 PE=1 SV=1 - [GUF1_HUMAN]	5.68	3	3	5	669	74.2812	8.5874	0.989704		0.927473	0.958589	1.05136		1.00832	1.02984	1.07433	0.200362
A8K132	cDNA FLJ75476, highly similar to Homo sapiens glutaminase (GLS), mRNA OS=Homo sapiens PE=2 SV=1 - [A8K132_HUMAN]	16.74	3	7	15	669	73.4619	7.76709	0.941146	0.954044	1.01198	0.969056	1.04865	0.969103	1.04484	1.02087	1.05346	0.200573
Q9ULV8	E3 ubiquitin-protein ligase CBL-C OS=Homo sapiens GN=CBLC PE=1 SV=3 - [CBLC_HUMAN]	4.01	2	2	3	474	52.4224	7.69385		1.02774	0.993836	1.01079		0.948355	0.815588	0.881972	0.872557	0.200834
O94903	Proline synthase co-transcribed bacterial homolog protein OS=Homo sapiens GN=PROSC PE=1 SV=1 - [PROSC_HUMAN]	29.45	7	7	25	275	30.3246	7.50342	0.976762	1.01939	1.00782	1.00132	1.02918	1.04962	1.00667	1.02849	1.02713	0.201067
Q9H7S9	Zinc finger protein 703 OS=Homo sapiens GN=ZNF703 PE=1 SV=1 - [ZN703_HUMAN]	4.58	2	2	3	590	58.1859	8.79248	0.971201	1.00534		0.98827	1.1006	1.02747		1.06403	1.07666	0.201247
Q9Y3D0	Mitotic spindle-associated MMXD complex subunit MIP18 OS=Homo sapiens GN=FAM96B PE=1 SV=1 - [MIP18_HUMAN]	30.67	3	3	6	163	17.6521	5.18604		0.985099	1.13424	1.05967		0.912786	0.925611	0.919199	0.86744	0.20135
Q5TFE4	5'-nucleotidase domain-containing protein 1 OS=Homo sapiens GN=NT5DC1 PE=1 SV=1 - [NT5D1_HUMAN]	13.85	5	5	10	455	51.8119	6.354	0.970061	0.967626	0.923481	0.953723	0.974895	1.01001	1.19141	1.05877	1.11014	0.201384
P05141	ADP/ATP translocase 2 OS=Homo sapiens GN=SLC25A5 PE=1 SV=7 - [ADT2_HUMAN]	44.97	5	16	193	298	32.8312	9.68604	1.00819	0.976794	0.956575	0.980519	0.967044	1.07262	1.09679	1.04548	1.06626	0.201706
B4E2B8	Integrin beta OS=Homo sapiens PE=2 SV=1 - [B4E2B8_HUMAN]	13.4	8	8	19	746	81.4683	5.84619	1.01099	1.15384	1.00202	1.05562	0.956405	0.89345	1.02921	0.95969	0.909127	0.20197
B3KSI3	Branched-chain-amino-acid aminotransferase OS=Homo sapiens GN=BCAT2 PE=1 SV=1 - [B3KSI3_HUMAN]	21.59	6	6	12	352	39.8897	8.23584	0.960277	0.982171	0.990352	0.9776	1.12084	1.06181	0.963704	1.04879	1.07282	0.202099
B7Z3I9	Delta-aminolevulinic acid dehydratase OS=Homo sapiens PE=2 SV=1 - [B7Z3I9_HUMAN]	9.58	2	2	2	313	34.4975	7.1958	0.845831	0.964741		0.905286	1.00895	1.02667		1.01781	1.12429	0.202113
Q59GM9	Alpha-1,4 glucan phosphorylase (Fragment) OS=Homo sapiens PE=2 SV=1 - [Q59GM9_HUMAN]	56.18	2	43	310	865	98.7666	6.96143	0.833009	1.09227	0.846476	0.923918	1.24129	0.921194	1.21758	1.12669	1.21947	0.202202
F2Z2U4	Transformation/transcription domain-associated protein OS=Homo sapiens GN=TRRAP PE=1 SV=3 - [F2Z2U4_HUMAN]	5.48	18	18	27	3848	435.858	8.22119	0.996325	0.983528	1.11776	1.03254	0.992921	0.959239	0.935792	0.962651	0.932317	0.2023
B2RA29	cDNA, FLJ94672, highly similar to Homo sapiens DPH2-like 1 (S. cerevisiae) (DPH2L1), mRNA OS=Homo sapiens PE=2 SV=1 - [B2RA29_HUMAN]	11.29	3	3	5	363	39.9845	6.44287	1.08772	1.0048	0.955782	1.0161	1.01908	1.12832	1.22837	1.12526	1.10743	0.202347
H0YDQ8	CREB-regulated transcription coactivator 2 (Fragment) OS=Homo sapiens GN=CRTC2 PE=1 SV=2 - [H0YDQ8_HUMAN]	7.9	2	2	3	481	51.1657	9.51025	1.0578	1.2364		1.1471	0.96458	0.991898		0.978239	0.852793	0.202525
B4DLR3	cDNA FLJ54020, highly similar to Heterogeneous nuclear ribonucleoprotein U OS=Homo sapiens PE=2 SV=1 - [B4DLR3_HUMAN]	29.08	1	27	172	784	86.8064	6.43018	1.14075	1.09865	0.952384	1.06393	0.85698	0.991904	1.0046	0.951162	0.894011	0.20266
B2R6S9	cDNA, FLJ93097, highly similar to Homo sapiens low density lipoprotein receptor-related protein associated protein 1 (LRPAP1), mRNA OS=Homo sapiens PE=2 SV=1 - [B2R6S9_HUMAN]	30.53	11	11	32	357	41.455	8.92432	1.00282	1.05008	1.0481	1.03367	1.04758	0.936666	0.86989	0.951377	0.92039	0.202667
A0A1B0GTB8	Carnitine O-palmitoyltransferase 2, mitochondrial OS=Homo sapiens GN=CPT2 PE=4 SV=1 - [A0A1B0GTB8_HUMAN]	19.21	12	12	35	635	71.1372	8.35303	0.949833	0.978461	1.03633	0.988209	1.02095	1.04572	1.02024	1.02897	1.04125	0.202726
Q9BQC6	Ribosomal protein 63, mitochondrial OS=Homo sapiens GN=MRPL57 PE=1 SV=1 - [RT63_HUMAN]	12.75	1	1	5	102	12.2585	11.4438	1.1336	1.03107	1.06214	1.0756	0.965482	1.02807	1.0517	1.01508	0.943738	0.202912
P52209	6-phosphogluconate dehydrogenase, decarboxylating OS=Homo sapiens GN=PGD PE=1 SV=3 - [6PGD_HUMAN]	43.27	5	21	138	483	53.106	7.2251	0.870098	0.925901	0.970074	0.922024	1.12856	0.978463	0.946783	1.01793	1.10402	0.203063
P67870	Casein kinase II subunit beta OS=Homo sapiens GN=CSNK2B PE=1 SV=1 - [CSK2B_HUMAN]	37.67	6	6	25	215	24.926	5.5542	1.01549	0.987273	0.929393	0.977386	1.03669	1.0146	1.00434	1.01854	1.04211	0.203199
H3BSZ3	5-demethoxyubiquinone hydroxylase, mitochondrial (Fragment) OS=Homo sapiens GN=COQ7 PE=1 SV=1 - [H3BSZ3_HUMAN]	19.42	2	2	4	103	11.2659	9.30518		0.999493	1.05614	1.02782		0.978809	0.908512	0.943661	0.918123	0.20329
P67936	Tropomyosin alpha-4 chain OS=Homo sapiens GN=TPM4 PE=1 SV=3 - [TPM4_HUMAN]	58.87	6	22	97	248	28.5045	4.69092	1.03678	0.986907	1.06842	1.0307	0.960127	1.01987	0.976988	0.98566	0.956302	0.203365
Q9NYK5	39S ribosomal protein L39, mitochondrial OS=Homo sapiens GN=MRPL39 PE=1 SV=3 - [RM39_HUMAN]	21.3	8	8	16	338	38.6867	7.6499	0.917095	0.966081	0.960519	0.947898	1.10747	0.967236	0.982975	1.01923	1.07525	0.203558
Q9NUG6	p53 and DNA damage-regulated protein 1 OS=Homo sapiens GN=PDRG1 PE=1 SV=2 - [PDRG1_HUMAN]	9.77	1	1	2	133	15.5013	6.06201	1.01638	0.993464		1.00492	1.06605	1.02743		1.04674	1.04161	0.203595
B2RB47	cDNA, FLJ95309, highly similar to Homo sapiens adenosine monophosphate deaminase 2 (isoform L)(AMPD2), mRNA OS=Homo sapiens PE=2 SV=1 - [B2RB47_HUMAN]	5.01	4	4	5	879	100.654	6.93213	0.970117	1.02806	1.19136	1.06318	0.975773	0.896324	0.988529	0.953542	0.896877	0.203724
P08708	40S ribosomal protein S17 OS=Homo sapiens GN=RPS17 PE=1 SV=2 - [RS17_HUMAN]	56.3	8	8	64	135	15.5404	9.84717	0.981564	1.13449	1.08697	1.06767	0.972162	0.844421	1.04744	0.954674	0.894163	0.204013
Q86UA8	SMARCA1 protein (Fragment) OS=Homo sapiens GN=SMARCA1 PE=2 SV=2 - [Q86UA8_HUMAN]	16.68	3	17	51	965	113.286	8.60205	0.99396	0.87897		0.936465	1.08462	1.02724		1.05593	1.12757	0.204084
Q6GMV3	Putative peptidyl-tRNA hydrolase PTRHD1 OS=Homo sapiens GN=PTRHD1 PE=1 SV=1 - [PTRD1_HUMAN]	25	3	3	5	140	15.7953	9.1001	0.984119	0.965273	0.957446	0.968946	1.07203	1.13911	0.950005	1.05372	1.08749	0.204106
A0A087X2D8	C-Jun-amino-terminal kinase-interacting protein 4 OS=Homo sapiens GN=SPAG9 PE=1 SV=1 - [A0A087X2D8_HUMAN]	13.87	16	16	30	1312	145.08	5.17334	0.961991	0.968258	0.856681	0.928976	1.00403	0.98192	0.971291	0.985748	1.06111	0.20418
B2RB99	cDNA, FLJ95387 OS=Homo sapiens PE=2 SV=1 - [B2RB99_HUMAN]	17.32	5	5	13	306	33.7772	8.5874	1.03245	0.926745	0.983744	0.980981	0.965023	0.919463	0.881604	0.92203	0.939906	0.204411
P62826	GTP-binding nuclear protein Ran OS=Homo sapiens GN=RAN PE=1 SV=3 - [RAN_HUMAN]	40.28	9	9	84	216	24.4076	7.48877	1.0335	0.941477	0.879857	0.951612	0.973055	1.05381	1.07461	1.03382	1.08639	0.204815
P21283	V-type proton ATPase subunit C 1 OS=Homo sapiens GN=ATP6V1C1 PE=1 SV=4 - [VATC1_HUMAN]	37.7	15	15	30	382	43.914	7.45947	1.00104	0.94896	0.934956	0.961653	0.977422	0.995158	1.01815	0.996911	1.03666	0.204909
P85037	Forkhead box protein K1 OS=Homo sapiens GN=FOXK1 PE=1 SV=1 - [FOXK1_HUMAN]	12.14	1	7	11	733	75.4106	9.31982		1.02567	1.02653	1.0261		1.00072	0.941243	0.970982	0.946286	0.205043
B2R7R4	cDNA, FLJ93569, highly similar to Homo sapiens synaptotagmin-like 4 (granuphilin-a) (SYTL4), mRNA OS=Homo sapiens PE=2 SV=1 - [B2R7R4_HUMAN]	4.17	2	2	2	671	75.9718	8.98291		1.02739	1.31628	1.17184		0.945234	0.722189	0.833712	0.711456	0.205083
P61158	Actin-related protein 3 OS=Homo sapiens GN=ACTR3 PE=1 SV=3 - [ARP3_HUMAN]	36.12	14	14	65	418	47.341	5.88428	0.94651	0.95622	0.999151	0.967294	0.987674	1.00941	0.985778	0.994288	1.02791	0.205254
Q9HB66	Alternative protein MKKS OS=Homo sapiens GN=MKKS PE=1 SV=1 - [Q9HB66_HUMAN]	41.27	2	2	3	63	7.25893	9.61279		1.04414	1.10544	1.07479		1.02681	0.97945	1.00313	0.933327	0.2055
B4DRN8	Palmitoyltransferase OS=Homo sapiens GN=ZDHHC20 PE=1 SV=1 - [B4DRN8_HUMAN]	9.59	2	2	2	292	33.7216	7.95752		1.02977	1.186	1.10788		0.925046	0.565206	0.745126	0.672567	0.205631
Q8IZ83	Aldehyde dehydrogenase family 16 member A1 OS=Homo sapiens GN=ALDH16A1 PE=1 SV=2 - [A16A1_HUMAN]	17.08	11	11	30	802	85.0737	6.78564	1.02417	1.01267	1.00763	1.01482	0.933821	0.995214	1.00872	0.979252	0.964951	0.205652
B2RWP4	TACC2 protein OS=Homo sapiens GN=TACC2 PE=2 SV=1 - [B2RWP4_HUMAN]	2.19	5	5	7	2826	296.56	4.79248	1.0453	0.991377	1.02046	1.01904	0.997071	1.00474	0.945966	0.982593	0.964231	0.205668
Q9BZQ6	ER degradation-enhancing alpha-mannosidase-like protein 3 OS=Homo sapiens GN=EDEM3 PE=1 SV=2 - [EDEM3_HUMAN]	5.69	5	5	6	932	104.598	4.93213	1.01882	0.945072	1.17692	1.04694	0.982227	0.892147	0.935205	0.936526	0.894539	0.205807
Q9BUL8	Programmed cell death protein 10 OS=Homo sapiens GN=PDCD10 PE=1 SV=1 - [PDC10_HUMAN]	24.53	4	5	14	212	24.6858	8.19189	0.949781	0.97594	1.01675	0.980824	1.14691	1.05584	0.977823	1.06019	1.08092	0.205834
B2R9T9	cDNA, FLJ94551 OS=Homo sapiens PE=2 SV=1 - [B2R9T9_HUMAN]	8.64	2	2	10	243	26.1776	10.6675	0.999924	0.9162	0.948853	0.954992	0.959078	1.11179	1.02288	1.03125	1.07985	0.205848
Q86TI2	Dipeptidyl peptidase 9 OS=Homo sapiens GN=DPP9 PE=1 SV=3 - [DPP9_HUMAN]	6.26	5	5	11	863	98.201	6.45557	0.965245	0.966458	0.967731	0.966478	0.991984	0.980662	0.963869	0.978838	1.01279	0.206137
B7Z992	cDNA FLJ53698, highly similar to Gelsolin OS=Homo sapiens PE=2 SV=1 - [B7Z992_HUMAN]	21.54	15	15	62	715	78.7827	6.11279	0.970687	0.948907	0.935296	0.95163	0.962213	0.992849	0.964333	0.973132	1.02259	0.206488
A8K3B6	Tyrosine-protein kinase OS=Homo sapiens PE=2 SV=1 - [A8K3B6_HUMAN]	11.78	5	5	10	450	50.6697	7.06396	0.955049	1.00781	1.0339	0.99892	1.05207	1.00629	1.11311	1.05716	1.0583	0.206505
Q9BW04	Specifically androgen-regulated gene protein OS=Homo sapiens GN=SARG PE=1 SV=2 - [SARG_HUMAN]	19.13	7	7	10	601	63.9254	8.6167	1.02908	1.04454	1.05658	1.0434	1.01576	1.01861	0.867426	0.967266	0.927032	0.206551
F5GXX5	Dolichyl-diphosphooligosaccharide--protein glycosyltransferase subunit DAD1 OS=Homo sapiens GN=DAD1 PE=1 SV=1 - [F5GXX5_HUMAN]	47.06	4	4	20	85	9.5481	7.18115	0.997037	1.05567	1.12385	1.05885	0.996855	1.03389	0.935973	0.988905	0.933942	0.206555
B3KMX3	cDNA FLJ12857 fis, clone NT2RP2003513, highly similar to Homo sapiens paralemmin (PALM), transcript variant 2, mRNA OS=Homo sapiens PE=2 SV=1 - [B3KMX3_HUMAN]	10.74	2	2	4	270	28.471	4.729	0.965576	0.876528	1.03272	0.958276	1.17634	1.15596	0.940212	1.09084	1.13833	0.206649
Q9NY27	Serine/threonine-protein phosphatase 4 regulatory subunit 2 OS=Homo sapiens GN=PPP4R2 PE=1 SV=3 - [PP4R2_HUMAN]	26.86	8	8	21	417	46.8689	4.53857	1.01758	0.984995	0.914429	0.972335	0.993084	1.02276	1.08942	1.03509	1.06454	0.206736
P50748	Kinetochore-associated protein 1 OS=Homo sapiens GN=KNTC1 PE=1 SV=1 - [KNTC1_HUMAN]	7.88	16	16	25	2209	250.588	5.97314	0.998848	1.04185	1.05968	1.03346	1.03606	0.957497	0.969953	0.987836	0.955853	0.20703
P42785	Lysosomal Pro-X carboxypeptidase OS=Homo sapiens GN=PRCP PE=1 SV=1 - [PCP_HUMAN]	9.07	4	4	9	496	55.7639	7.21045	0.992697	1.06637	1.09024	1.04977	1.06137	0.901808	0.926226	0.963133	0.917472	0.207341
Q5T4S7	E3 ubiquitin-protein ligase UBR4 OS=Homo sapiens GN=UBR4 PE=1 SV=1 - [UBR4_HUMAN]	14.91	29	68	144	5183	573.476	6.03662	0.987084	0.999753	1.00413	0.996988	0.976625	0.987404	0.994284	0.986104	0.989084	0.207573
B3KQ21	cDNA FLJ32640 fis, clone SYNOV2001033, highly similar to U3 small nucleolar RNA-associated protein 6 homolog OS=Homo sapiens PE=2 SV=1 - [B3KQ21_HUMAN]	10.22	5	5	6	597	70.1629	7.45947	1.18024		0.99922	1.08973	0.717386		0.93791	0.827648	0.759497	0.207582
P02656	Apolipoprotein C-III OS=Homo sapiens GN=APOC3 PE=1 SV=1 - [APOC3_HUMAN]	16.16	1	1	6	99	10.8455	5.41455	0.854604	0.975856	0.952177	0.927545	0.929023	0.774618	0.810537	0.838059	0.903524	0.207686
Q9NZJ6	Ubiquinone biosynthesis O-methyltransferase, mitochondrial OS=Homo sapiens GN=COQ3 PE=1 SV=3 - [COQ3_HUMAN]	9.76	2	2	4	369	41.028	7.41553	0.97759	1.06263	1.16944	1.06989	1.02622	0.894396	0.983968	0.968194	0.904949	0.207779
O95218	Zinc finger Ran-binding domain-containing protein 2 OS=Homo sapiens GN=ZRANB2 PE=1 SV=2 - [ZRAB2_HUMAN]	15.15	6	6	8	330	37.382	10.0083	0.961029	0.97156	1.0487	0.993761	1.31017	1.13038	0.983638	1.1414	1.14856	0.207856
C9JA93	TBC1 domain family member 15 (Fragment) OS=Homo sapiens GN=TBC1D15 PE=1 SV=1 - [C9JA93_HUMAN]	39.57	1	9	28	278	32.1165	8.83643	0.967652	0.993097	1.00572	0.988822	0.986519	0.938694	0.961314	0.962176	0.973052	0.208317
Q9H6Y2	WD repeat-containing protein 55 OS=Homo sapiens GN=WDR55 PE=1 SV=2 - [WDR55_HUMAN]	9.14	2	2	7	383	42.0436	4.91943	1.03054	1.03109	1.08062	1.04742	0.960252	1.05915	0.890033	0.969811	0.925908	0.208356
Q9UKM9	RNA-binding protein Raly OS=Homo sapiens GN=RALY PE=1 SV=1 - [RALY_HUMAN]	47.06	14	14	46	306	32.4436	9.17334	1.03874	0.965942	0.930365	0.978348	1.01883	1.05864	1.01431	1.03059	1.0534	0.208365
H0YLF3	Beta-2-microglobulin (Fragment) OS=Homo sapiens GN=B2M PE=1 SV=1 - [H0YLF3_HUMAN]	28.17	2	2	9	71	8.49315	5.14795	1.06247	1.08701	0.924911	1.0248	0.808415	0.968395	0.967953	0.914921	0.892783	0.208507
B4DDP8	cDNA FLJ55953, highly similar to ADP-dependent glucokinase (EC 2.7.1.147) OS=Homo sapiens PE=2 SV=1 - [B4DDP8_HUMAN]	18.27	6	6	23	416	45.627	5.97314	0.990272	1.05385	1.12476	1.05629	1.03594	0.940445	0.978038	0.984808	0.932324	0.208736
Q7Z6J0	E3 ubiquitin-protein ligase SH3RF1 OS=Homo sapiens GN=SH3RF1 PE=1 SV=2 - [SH3R1_HUMAN]	3.04	3	3	5	888	93.0706	8.54346	1.07387	0.917074	0.924149	0.971697	0.921976	0.747137	0.90624	0.858451	0.883455	0.209046
Q5TC12	ATP synthase mitochondrial F1 complex assembly factor 1 OS=Homo sapiens GN=ATPAF1 PE=1 SV=1 - [ATPF1_HUMAN]	15.55	4	4	4	328	36.4136	7.95752	0.92075	0.88116	1.0598	0.953903	1.05559	1.09443	0.990312	1.04678	1.09736	0.20912
Q9Y4G6	Talin-2 OS=Homo sapiens GN=TLN2 PE=1 SV=4 - [TLN2_HUMAN]	4.88	2	13	27	2542	271.443	5.56689	1.12618		1.78538	1.45578	0.926498		0.727018	0.826758	0.567913	0.209282
B4DVS2	cDNA FLJ57617 OS=Homo sapiens PE=2 SV=1 - [B4DVS2_HUMAN]	9.38	5	5	5	800	88.8342	4.97021	0.950157	1.02817	1.13578	1.03804	1.01454	0.865963	0.924574	0.935024	0.900763	0.209801
B3KWN0	cDNA FLJ43389 fis, clone OCBBF2007068, highly similar to Ankyrin repeat domain-containing protein 52 OS=Homo sapiens PE=2 SV=1 - [B3KWN0_HUMAN]	6.97	7	7	12	1076	115.023	6.50732	0.958612	0.962746	1.03889	0.986748	0.99352	0.893847	0.829703	0.90569	0.917854	0.210028
Q12904	Aminoacyl tRNA synthase complex-interacting multifunctional protein 1 OS=Homo sapiens GN=AIMP1 PE=1 SV=2 - [AIMP1_HUMAN]	53.21	13	14	70	312	34.3311	8.42627	0.990039	0.979189	0.915348	0.961526	0.989064	0.98598	1.0627	1.01258	1.0531	0.210081
Q02252	Methylmalonate-semialdehyde dehydrogenase [acylating], mitochondrial OS=Homo sapiens GN=ALDH6A1 PE=1 SV=2 - [MMSA_HUMAN]	13.27	6	6	15	535	57.8027	8.49951	0.938556	0.990184	0.917767	0.948836	1.09182	1.02739	0.942893	1.0207	1.07574	0.210204
Q9H3P7	Golgi resident protein GCP60 OS=Homo sapiens GN=ACBD3 PE=1 SV=4 - [GCP60_HUMAN]	17.61	5	6	15	528	60.556	5.05908	0.886922	0.987437	0.959554	0.944638	1.05365	0.936665	1.09048	1.02693	1.08712	0.2103
Q7Z7K0	COX assembly mitochondrial protein homolog OS=Homo sapiens GN=CMC1 PE=1 SV=1 - [COXM1_HUMAN]	25.47	2	2	4	106	12.4813	8.63135	1.02026	1.0421	1.05592	1.03942	0.905707	1.06138	0.930337	0.965808	0.929176	0.210528
B4DVK6	cDNA FLJ55564, highly similar to Probable E3 ubiquitin-protein ligase HECTD3 OS=Homo sapiens PE=2 SV=1 - [B4DVK6_HUMAN]	4.13	2	2	5	727	81.6461	6.50732	1.04605	1.01107	0.978161	1.01176	0.925468	1.01668	0.938982	0.960376	0.949214	0.210881
Q3B726	DNA-directed RNA polymerase I subunit RPA43 OS=Homo sapiens GN=TWISTNB PE=1 SV=1 - [RPA43_HUMAN]	13.02	4	4	11	338	37.4088	6.97607	1.00856	0.949625	1.02085	0.993012	1.02695	1.09089	1.00915	1.04233	1.04966	0.211063
Q7Z7E8	Ubiquitin-conjugating enzyme E2 Q1 OS=Homo sapiens GN=UBE2Q1 PE=1 SV=1 - [UB2Q1_HUMAN]	11.85	3	3	4	422	46.0981	5.09717	0.955767	1.02908		0.992426	1.12082	1.04961		1.08522	1.0935	0.211066
P22570	NADPH:adrenodoxin oxidoreductase, mitochondrial OS=Homo sapiens GN=FDXR PE=1 SV=3 - [ADRO_HUMAN]	33.6	15	15	46	491	53.803	8.44092	1.04717	1.02758	0.941297	1.00535	1.04356	1.07315	1.04992	1.05554	1.04993	0.211083
F5GYJ5	Uncharacterized protein OS=Homo sapiens PE=3 SV=1 - [F5GYJ5_HUMAN]	13.64	2	2	5	154	18.3764	6.80029	1.02051	1.02755	1.2226	1.09022	1.01014	1.01549	0.916903	0.980842	0.899672	0.211187
Q14444	Caprin-1 OS=Homo sapiens GN=CAPRIN1 PE=1 SV=2 - [CAPR1_HUMAN]	11.57	8	8	36	709	78.318	5.24951	0.997933	0.958288	1.07321	1.00981	0.935423	0.998725	0.836311	0.923486	0.914516	0.211197
F8VVX6	2-methoxy-6-polyprenyl-1,4-benzoquinol methylase, mitochondrial (Fragment) OS=Homo sapiens GN=COQ5 PE=1 SV=1 - [F8VVX6_HUMAN]	12.68	2	2	4	213	24.4846	7.03467	0.995161	1.06268	1.17319	1.07701	1.04124	0.991645	0.820009	0.950966	0.88297	0.211224
P52799	Ephrin-B2 OS=Homo sapiens GN=EFNB2 PE=1 SV=1 - [EFNB2_HUMAN]	15.62	4	4	8	333	36.8998	8.85107	0.959465	0.986968	1.09471	1.01371	0.996272	0.918437	0.901053	0.938587	0.925891	0.211775
Q5VYK3	Proteasome-associated protein ECM29 homolog OS=Homo sapiens GN=ECM29 PE=1 SV=2 - [ECM29_HUMAN]	11	16	16	39	1845	204.16	7.12256	0.983222	1.01561	0.964567	0.987799	1.02899	0.996339	1.13247	1.0526	1.0656	0.211895
Q6ICV6	SLC35A2 protein (Fragment) OS=Homo sapiens GN=SLC35A2 PE=2 SV=1 - [Q6ICV6_HUMAN]	2.8	1	1	5	393	40.9954	9.93506	1.20305	0.972604	1.07848	1.08471	0.730589	1.07408	0.917398	0.907357	0.836495	0.212095
Q9UDY4	DnaJ homolog subfamily B member 4 OS=Homo sapiens GN=DNAJB4 PE=1 SV=1 - [DNJB4_HUMAN]	7.72	1	2	5	337	37.7831	8.49951	0.780691	0.892474		0.836582	1.2578	0.971481		1.11464	1.33237	0.212125
Q3YEC7	Rab-like protein 6 OS=Homo sapiens GN=RABL6 PE=1 SV=2 - [RABL6_HUMAN]	15.23	8	8	22	729	79.4996	5.22412	1.00233	1.01844	1.07273	1.03117	0.892428	1.00928	1.00003	0.967245	0.938011	0.212439
Q8NBU5	ATPase family AAA domain-containing protein 1 OS=Homo sapiens GN=ATAD1 PE=1 SV=1 - [ATAD1_HUMAN]	22.71	7	7	22	361	40.718	6.90283	0.973346	0.97536	0.983532	0.977413	0.973949	1.01405	1.07353	1.02051	1.04409	0.212673
A0A1B0GVI6	Ras-related protein Rab-34, isoform NARR OS=Homo sapiens GN=RAB34 PE=4 SV=1 - [A0A1B0GVI6_HUMAN]	18.27	2	2	5	197	20.9775	12.1616	1.0443	0.966653	1.03094	1.01397	0.967163	0.998071	0.850548	0.938594	0.925666	0.212869
B2R5N4	cDNA, FLJ92544, highly similar to Homo sapiens lectin, mannose-binding 2-like (LMAN2L), mRNA OS=Homo sapiens PE=2 SV=1 - [B2R5N4_HUMAN]	8.91	3	3	8	348	39.6673	8.38232	0.907781	0.940523	0.992399	0.946901	1.12094	1.09691	0.921976	1.04661	1.1053	0.212961
A0A024RBS6	tRNA pseudouridine synthase OS=Homo sapiens GN=PUS1 PE=3 SV=1 - [A0A024RBS6_HUMAN]	21.3	7	7	16	338	37.8069	7.10791	1.001	0.97706	0.963719	0.980595	0.980089	1.13842	1.03465	1.05105	1.07185	0.213698
Q9NQR4	Omega-amidase NIT2 OS=Homo sapiens GN=NIT2 PE=1 SV=1 - [NIT2_HUMAN]	41.67	9	9	41	276	30.5886	7.21045	1.02736	0.972907	0.938834	0.979701	0.989752	1.0338	1.06581	1.02979	1.05112	0.213863
B4DZF6	cDNA FLJ54206, highly similar to Ubiquilin-4 OS=Homo sapiens PE=2 SV=1 - [B4DZF6_HUMAN]	19.45	4	7	20	581	62.1456	5.30029		1.05847	1.23495	1.14671		1.00736	0.955897	0.981629	0.856039	0.214326
Q8WUJ3	Cell migration-inducing and hyaluronan-binding protein OS=Homo sapiens GN=CEMIP PE=1 SV=2 - [CEMIP_HUMAN]	1.98	2	2	4	1361	152.9	7.85498		0.943939	1.11499	1.02946		0.900958	0.81456	0.857759	0.83321	0.215
Q8TB72	Pumilio homolog 2 OS=Homo sapiens GN=PUM2 PE=1 SV=2 - [PUM2_HUMAN]	6.57	4	6	9	1066	114.145	7.07861	0.986802		1.023	1.0049	0.977877		0.94949	0.963683	0.958983	0.215008
A8K874	cDNA FLJ77588, highly similar to Homo sapiens MAK10 homolog, amino-acid N-acetyltransferase subunit, (S. cerevisiae) (MAK10), mRNA OS=Homo sapiens PE=2 SV=1 - [A8K874_HUMAN]	8	5	5	9	725	83.5541	7.04932	0.881052	0.979025	0.984949	0.948342	1.18218	1.0248	0.962577	1.05652	1.11407	0.215152
B4DDN9	cDNA FLJ60412, highly similar to Leucine-rich repeat protein SHOC-2 OS=Homo sapiens PE=2 SV=1 - [B4DDN9_HUMAN]	5.88	1	1	3	221	24.7592	6.41748	1.01248	1.01909	0.88399	0.971856	0.988975	1.06022	1.13756	1.06225	1.09301	0.215163
Q9NSK0	Kinesin light chain 4 OS=Homo sapiens GN=KLC4 PE=1 SV=3 - [KLC4_HUMAN]	14.38	4	7	11	619	68.5976	6.17627		0.965145	1.04818	1.00666		1.10684	1.06948	1.08816	1.08096	0.215289
Q68CP9	AT-rich interactive domain-containing protein 2 OS=Homo sapiens GN=ARID2 PE=1 SV=2 - [ARID2_HUMAN]	2.62	4	4	10	1835	197.268	7.41553	0.990937	1.04791	1.01708	1.01864	0.980775	0.926625	1.0144	0.973935	0.956111	0.2155
Q13057	Bifunctional coenzyme A synthase OS=Homo sapiens GN=COASY PE=1 SV=4 - [COASY_HUMAN]	18.09	8	8	32	564	62.29	6.99072	0.9649	1.00303	0.959575	0.975835	0.958088	1.06947	1.13044	1.05267	1.07873	0.21561
E5RK82	Centrin-3 OS=Homo sapiens GN=CETN3 PE=1 SV=1 - [E5RK82_HUMAN]	13.46	2	2	2	156	18.3253	4.90674	1.00918		1.18764	1.09841	0.962495		0.784381	0.873438	0.795185	0.216269
P62316	Small nuclear ribonucleoprotein Sm D2 OS=Homo sapiens GN=SNRPD2 PE=1 SV=1 - [SMD2_HUMAN]	66.95	9	9	59	118	13.5182	9.90576	0.979229	1.01643	0.958965	0.984876	1.02163	0.998294	1.01472	1.01155	1.02708	0.216545
A0PJ48	TAOK2 protein (Fragment) OS=Homo sapiens GN=TAOK2 PE=2 SV=1 - [A0PJ48_HUMAN]	4.07	3	3	7	762	87.7048	7.66455	0.973202	0.969486	0.998827	0.980505	1.03157	1.01877	0.975723	1.00869	1.02875	0.21693
Q6NTA2	HNRNPL protein (Fragment) OS=Homo sapiens GN=HNRNPL PE=2 SV=2 - [Q6NTA2_HUMAN]	41.08	15	16	100	572	61.8881	7.38623	1.01276	0.990207	1.0072	1.00339	1.00386	1.02717	1.07251	1.03451	1.03102	0.217163
Q6P582	Mitotic-spindle organizing protein 2A OS=Homo sapiens GN=MZT2A PE=1 SV=2 - [MZT2A_HUMAN]	39.87	5	5	12	158	16.2105	9.64209	1.01106	1.11242	1.15968	1.09438	1.03322	0.90347	1.05997	0.998887	0.91274	0.217163
B2RAY1	cDNA, FLJ95184, highly similar to Homo sapiens signal transducing adaptor molecule (SH3 domain and ITAM motif) 1 (STAM), mRNA OS=Homo sapiens PE=2 SV=1 - [B2RAY1_HUMAN]	7.04	3	3	7	540	59.1121	4.84326	0.98349	0.922465	0.908556	0.93817	0.976071	0.953478	1.0631	0.99755	1.06329	0.217185
Q96C86	m7GpppX diphosphatase OS=Homo sapiens GN=DCPS PE=1 SV=2 - [DCPS_HUMAN]	17.8	5	5	20	337	38.585	6.37939	0.989	1.03838	0.917137	0.981505	1.00454	1.04606	1.06911	1.03991	1.0595	0.217576
O00411	DNA-directed RNA polymerase, mitochondrial OS=Homo sapiens GN=POLRMT PE=1 SV=2 - [RPOM_HUMAN]	8.94	11	11	19	1230	138.532	8.98291	1.01778	1.0063	1.02348	1.01585	0.967761	0.933107	1.02591	0.975593	0.960368	0.217615
B3KTT0	cDNA FLJ38675 fis, clone IMR322000243, highly similar to Nucleoporin Nup43 OS=Homo sapiens PE=2 SV=1 - [B3KTT0_HUMAN]	8.16	2	2	4	380	42.1254	5.5415	1.058	1.0655	0.949104	1.0242	0.910556	0.95293	1.00529	0.956259	0.933664	0.218045
Q86TU7	Histone-lysine N-methyltransferase setd3 OS=Homo sapiens GN=SETD3 PE=1 SV=1 - [SETD3_HUMAN]	23.06	12	12	29	594	67.2152	5.96045	1.01359	0.992189	1.0527	1.01949	0.932749	1.0214	0.967372	0.973839	0.95522	0.218348
A0A024R7L5	UPF1 regulator of nonsense transcripts homolog (Yeast), isoform CRA_b OS=Homo sapiens GN=UPF1 PE=4 SV=1 - [A0A024R7L5_HUMAN]	38.91	35	36	119	1118	122.958	6.68311	0.983547	0.951666	1.00657	0.980593	1.01611	1.0394	0.984537	1.01335	1.0334	0.219101
O75828	Carbonyl reductase [NADPH] 3 OS=Homo sapiens GN=CBR3 PE=1 SV=3 - [CBR3_HUMAN]	26.35	3	6	30	277	30.8307	6.17627		0.941133	0.992091	0.966612		1.08514	1.00943	1.04729	1.08346	0.219102
A0A0S2Z4N8	Vasodilator-stimulated phosphoprotein isoform 2 (Fragment) OS=Homo sapiens GN=VASP PE=2 SV=1 - [A0A0S2Z4N8_HUMAN]	47.87	1	14	47	328	35.4058	8.93896	1.03788	0.877326	0.931456	0.948887	0.99963	1.05657	1.01011	1.0221	1.07716	0.219209
Q9Y2Z9	Ubiquinone biosynthesis monooxygenase COQ6, mitochondrial OS=Homo sapiens GN=COQ6 PE=1 SV=2 - [COQ6_HUMAN]	4.91	2	2	3	468	50.8378	7.29834	0.934391	1.02415	0.91394	0.957492	1.08801	0.947425	1.26757	1.101	1.14988	0.219373
P18827	Syndecan-1 OS=Homo sapiens GN=SDC1 PE=1 SV=3 - [SDC1_HUMAN]	11.61	2	2	9	310	32.4419	4.62744	1.00427	1.03437	1.06387	1.03417	1.04001	0.941383	0.773735	0.918374	0.88803	0.219449
A8K9B9	cDNA FLJ77391, highly similar to Homo sapiens EH-domain containing 4 (EHD4), mRNA OS=Homo sapiens PE=2 SV=1 - [A8K9B9_HUMAN]	23.84	9	11	30	541	61.1175	6.65381	0.984914	0.966312	0.995874	0.982366	0.980698	1.04169	1.01025	1.01088	1.02902	0.219605
Q6UXP6	LKHP9428 OS=Homo sapiens GN=UNQ9428 PE=2 SV=1 - [Q6UXP6_HUMAN]	3.21	1	1	2	218	23.8869	6.27783		1.01989	0.915518	0.967706		1.09756	1.04449	1.07102	1.10676	0.219658
Q6I7N8	Lymphoid specific helicase variant9 OS=Homo sapiens GN=HELLS PE=2 SV=1 - [Q6I7N8_HUMAN]	12.11	10	10	15	809	93.9026	8.1626	0.988431	0.964398	1.174	1.04227	0.879141	1.01574	0.883267	0.926048	0.888487	0.219867
H3BSJ6	Adhesion G-protein-coupled receptor G1 (Fragment) OS=Homo sapiens GN=ADGRG1 PE=1 SV=1 - [H3BSJ6_HUMAN]	5.35	1	1	6	187	21.105	7.50342	0.967546	1.06509	1.504	1.17888	1.05123	0.901299	0.796001	0.916176	0.777161	0.219965
Q14694	Ubiquitin carboxyl-terminal hydrolase 10 OS=Homo sapiens GN=USP10 PE=1 SV=2 - [UBP10_HUMAN]	15.91	9	9	26	798	87.0798	5.31299	0.89731	0.989472	1.01527	0.967352	1.10117	1.0508	0.974026	1.042	1.07717	0.220537
F5GWX5	Chromodomain-helicase-DNA-binding protein 4 OS=Homo sapiens GN=CHD4 PE=1 SV=1 - [F5GWX5_HUMAN]	17.74	22	27	67	1905	216.967	5.80811	0.992418	1.03307	1.07151	1.03233	1.0152	0.991727	0.981841	0.996255	0.965053	0.220746
P06899	Histone H2B type 1-J OS=Homo sapiens GN=HIST1H2BJ PE=1 SV=3 - [H2B1J_HUMAN]	57.14	2	9	365	126	13.8956	10.3159	1.11724	1.00782	0.967982	1.03102	0.874112	0.964848	1.00043	0.946464	0.917991	0.220938
Q9UBK8	Methionine synthase reductase OS=Homo sapiens GN=MTRR PE=1 SV=3 - [MTRR_HUMAN]	4.55	2	2	3	725	80.3594	6.49365	1.08654		1.09203	1.08929	1.028		0.866097	0.947048	0.869419	0.221153
B1AK13	3-hydroxymethyl-3-methylglutaryl-Coenzyme A lyase (Hydroxymethylglutaricaciduria), isoform CRA_b OS=Homo sapiens GN=HMGCL PE=2 SV=1 - [B1AK13_HUMAN]	12	3	3	9	300	31.7143	7.60596	0.865488	1.03156	1.11547	1.00417	1.21671	1.05982	1.11233	1.12962	1.12493	0.221562
A0A0S2Z513	A kinase anchor protein 10 isoform 2 OS=Homo sapiens GN=AKAP10 PE=2 SV=1 - [A0A0S2Z513_HUMAN]	8.44	2	2	2	403	44.7685	8.06006		1.02478	1.08225	1.05352		0.992992	0.859989	0.926491	0.879427	0.221621
P07737	Profilin-1 OS=Homo sapiens GN=PFN1 PE=1 SV=2 - [PROF1_HUMAN]	70	10	10	189	140	15.0446	8.26514	1.01068	1.01538	0.969608	0.998559	1.00306	1.0291	1.07982	1.03733	1.03882	0.221824
A0A087X208	Agrin OS=Homo sapiens GN=AGRN PE=1 SV=1 - [A0A087X208_HUMAN]	2.85	5	5	5	1930	202.162	6.3667	0.923838	1.07707	1.15057	1.05049	0.954668	0.710485	1.0006	0.888585	0.845874	0.22215
B9ZVT1	RNA-binding protein 12B OS=Homo sapiens GN=RBM12B PE=1 SV=2 - [B9ZVT1_HUMAN]	2.38	2	2	2	881	102.641	7.53271	0.715165		1.05028	0.882722	1.25638		1.13334	1.19486	1.35361	0.222446
A0A024R6W0	Aspartate aminotransferase OS=Homo sapiens GN=GOT2 PE=4 SV=1 - [A0A024R6W0_HUMAN]	46.51	18	18	140	430	47.4453	9.01221	1.02665	0.966038	0.950197	0.980963	0.997355	1.01862	1.0424	1.01946	1.03924	0.222603
Q9Y4B6	Protein VPRBP OS=Homo sapiens GN=VPRBP PE=1 SV=3 - [VPRBP_HUMAN]	5.97	8	8	13	1507	168.9	5.05908	1.01443	1.18041	1.06078	1.08521	0.915426	0.855019	1.10063	0.957026	0.881884	0.222833
Q9BTC0	Death-inducer obliterator 1 OS=Homo sapiens GN=DIDO1 PE=1 SV=5 - [DIDO1_HUMAN]	3.39	6	6	6	2240	243.723	7.88428	1.04696		1.14137	1.09416	1.01723		0.879185	0.948209	0.866606	0.223019
Q9H3U1	Protein unc-45 homolog A OS=Homo sapiens GN=UNC45A PE=1 SV=1 - [UN45A_HUMAN]	24.47	21	22	58	944	103.011	6.07471	1.01268	0.979008	1.07579	1.02249	0.988616	0.995748	0.935794	0.973386	0.951974	0.223177
Q9Y6C9	Mitochondrial carrier homolog 2 OS=Homo sapiens GN=MTCH2 PE=1 SV=1 - [MTCH2_HUMAN]	32.34	8	8	28	303	33.3089	7.97217	1.03235	1.08099	0.986306	1.03322	1.00559	0.966504	0.998531	0.990209	0.958376	0.223287
Q9UPU5	Ubiquitin carboxyl-terminal hydrolase 24 OS=Homo sapiens GN=USP24 PE=1 SV=3 - [UBP24_HUMAN]	8.4	17	17	24	2620	294.178	6.13818	0.913891	1.01838	0.989494	0.973922	1.07436	1.00836	1.00517	1.02929	1.05685	0.223327
Q8IYB7	DIS3-like exonuclease 2 OS=Homo sapiens GN=DIS3L2 PE=1 SV=4 - [DI3L2_HUMAN]	5.54	4	4	6	885	99.2165	6.1001	1.05351	1.05148	0.923733	1.00958	0.917933	0.975044	0.936932	0.943303	0.934356	0.223865
G3XAN4	Translocating chain-associated membrane protein 1 OS=Homo sapiens GN=TRAM1 PE=1 SV=1 - [G3XAN4_HUMAN]	6.6	2	2	5	288	33.4138	9.89111	0.981872	0.938697	0.874101	0.931557	0.975622	0.971531	0.983381	0.976845	1.04862	0.223976
Q14789	Golgin subfamily B member 1 OS=Homo sapiens GN=GOLGB1 PE=1 SV=2 - [GOGB1_HUMAN]	7.92	20	21	38	3259	375.79	4.99561	1.01113	1.01183	0.954441	0.992467	0.953165	0.939036	0.984691	0.958964	0.966243	0.22411
Q86WJ1	Chromodomain-helicase-DNA-binding protein 1-like OS=Homo sapiens GN=CHD1L PE=1 SV=2 - [CHD1L_HUMAN]	14.05	11	11	28	897	100.921	6.90283	0.986667	1.02116	1.05461	1.02081	1.02183	0.966353	0.942416	0.976867	0.956948	0.224624
R4GN98	Protein S100 (Fragment) OS=Homo sapiens GN=S100A6 PE=1 SV=1 - [R4GN98_HUMAN]	36.47	4	4	49	85	9.67506	5.45264	0.970558	0.978296	1.08691	1.01192	1.02143	0.893813	0.820645	0.911963	0.901219	0.224633
B3KTM6	Ribosomal protein L5, isoform CRA_b OS=Homo sapiens GN=RPL5 PE=2 SV=1 - [B3KTM6_HUMAN]	52.23	14	14	108	247	28.0262	9.12939	1.06728	1.03802	0.950165	1.01849	0.860629	0.932102	1.01668	0.936472	0.919472	0.224959
B5BU61	Histone deacetylase OS=Homo sapiens GN=HDAC1 PE=2 SV=1 - [B5BU61_HUMAN]	28.63	11	13	36	482	55.0407	5.47803	0.957674	1.00237	1.12008	1.02671	1.00476	0.930879	0.892846	0.942828	0.918302	0.225089
Q9P013	Spliceosome-associated protein CWC15 homolog OS=Homo sapiens GN=CWC15 PE=1 SV=2 - [CWC15_HUMAN]	15.28	2	2	6	229	26.6083	5.70654	1.11327	1.02976	1.00416	1.04906	0.879028	1.02016	1.00788	0.969021	0.923701	0.225298
A0A1B0GVV3	RILP-like protein 1 OS=Homo sapiens GN=RILPL1 PE=4 SV=1 - [A0A1B0GVV3_HUMAN]	8.03	2	2	3	386	44.7381	5.07178	1.05565	1.01798	1.06932	1.04765	0.926489	1.06204	0.970695	0.986407	0.941544	0.225356
Q8WVV4	Protein POF1B OS=Homo sapiens GN=POF1B PE=1 SV=3 - [POF1B_HUMAN]	30.9	17	17	44	589	68.0224	6.31592	0.989856	1.05334	1.20469	1.08263	1.03197	0.999286	0.870681	0.967314	0.893486	0.225398
G8JLD5	Dynamin-1-like protein OS=Homo sapiens GN=DNM1L PE=1 SV=1 - [G8JLD5_HUMAN]	42.28	27	27	75	712	79.572	7.07861	0.968382	0.979839	1.02736	0.991859	1.06707	0.996281	1.02938	1.03091	1.03937	0.225526
A0A0C4DGS9	Choline/ethanolaminephosphotransferase 1 OS=Homo sapiens GN=CEPT1 PE=1 SV=1 - [A0A0C4DGS9_HUMAN]	3.93	1	1	2	280	31.2727	7.92822		1.11295	1.1787	1.14582		0.989497	1.09175	1.04062	0.90819	0.225653
B4DJ21	cDNA FLJ53444, highly similar to Tyrosine-protein phosphatase non-receptor type 23 (EC 3.1.3.48) OS=Homo sapiens PE=2 SV=1 - [B4DJ21_HUMAN]	11.95	9	9	17	912	100.653	6.58057	0.986959	0.954229	0.981444	0.974211	0.983686	1.05673	0.990953	1.01046	1.03721	0.225834
A0A075B730	Epiplakin OS=Homo sapiens GN=EPPK1 PE=1 SV=2 - [A0A075B730_HUMAN]	20.88	18	24	75	5063	552.791	5.60498	1.059	1.05858	0.96075	1.02611	0.824764	0.874038	1.05193	0.916911	0.89358	0.225837
Q13601	KRR1 small subunit processome component homolog OS=Homo sapiens GN=KRR1 PE=1 SV=4 - [KRR1_HUMAN]	19.16	7	7	11	381	43.6377	9.77393	1.0257	1.08804	1.00026	1.038	0.874068	1.00021	1.01658	0.963617	0.92834	0.226032
B2R4V2	cDNA, FLJ92227, highly similar to Homo sapiens ribosomal protein L36a-like (RPL36AL), mRNA OS=Homo sapiens PE=2 SV=1 - [B2R4V2_HUMAN]	24.53	1	4	21	106	12.5189	10.6528	1.09961	0.964089		1.03185	0.91323	0.9162		0.914715	0.88648	0.226089
Q8IZW8	Tensin-4 OS=Homo sapiens GN=TNS4 PE=1 SV=3 - [TENS4_HUMAN]	8.67	5	5	9	715	76.715	7.34229	1.04306	0.994624	1.38466	1.14078	1.007	1.02361	0.644407	0.891674	0.781634	0.226112
I3L4I0	FLYWCH family member 2 (Fragment) OS=Homo sapiens GN=FLYWCH2 PE=1 SV=1 - [I3L4I0_HUMAN]	41.76	3	3	6	91	9.55419	9.83252	0.934887	1.06012	0.986331	0.993779	1.11499	1.0675	1.00555	1.06268	1.06933	0.226189
A0A0C4DGQ8	Dehydrogenase/reductase SDR family member 7B OS=Homo sapiens GN=DHRS7B PE=1 SV=1 - [A0A0C4DGQ8_HUMAN]	10	3	3	13	310	33.5027	9.29053	0.977637	1.04219	0.951297	0.990374	1.05892	0.990254	1.11788	1.05569	1.06595	0.226228
O75844	CAAX prenyl protease 1 homolog OS=Homo sapiens GN=ZMPSTE24 PE=1 SV=2 - [FACE1_HUMAN]	27.16	11	11	45	475	54.7775	7.48877	0.986944	0.989338	0.900994	0.959092	0.978573	1.00313	1.046	1.00923	1.05228	0.226405
Q8WXE0	Caskin-2 OS=Homo sapiens GN=CASKIN2 PE=1 SV=2 - [CSKI2_HUMAN]	3.24	3	3	7	1202	126.705	7.09326	1.00344	1.02406	1.12236	1.04995	1.05049	0.955948	0.854236	0.953558	0.908191	0.226492
A8K4T6	cDNA FLJ76282, highly similar to Homo sapiens proteasome (prosome, macropain) 26S subunit, non-ATPase, 5 (PSMD5), mRNA OS=Homo sapiens PE=2 SV=1 - [A8K4T6_HUMAN]	33.93	13	13	40	504	56.1884	5.56689	1.00308	0.988099	0.969871	0.987018	1.08621	1.00744	0.995804	1.02982	1.04336	0.226493
Q9Y6X9	MORC family CW-type zinc finger protein 2 OS=Homo sapiens GN=MORC2 PE=1 SV=2 - [MORC2_HUMAN]	3.29	3	3	5	1032	117.75	8.38232	1.01236	0.955093	1.08461	1.01735	0.989575	0.959647	0.780924	0.910049	0.894525	0.226496
E7EVL6	Replication initiator 1 (Fragment) OS=Homo sapiens GN=REPIN1 PE=1 SV=1 - [E7EVL6_HUMAN]	10.96	1	1	5	146	16.1294	11.6343	0.943978	1.00524	0.895908	0.948374	1.30642	1.10265	0.925886	1.11165	1.17217	0.226688
D3DUJ0	AFG3 ATPase family gene 3-like 2 (Yeast), isoform CRA_a (Fragment) OS=Homo sapiens GN=AFG3L2 PE=3 SV=1 - [D3DUJ0_HUMAN]	24.11	19	19	38	759	84.3921	8.42627	0.947155	0.928429	1.01093	0.962172	1.02612	1.04151	0.965131	1.01092	1.05066	0.226838
P37802	Transgelin-2 OS=Homo sapiens GN=TAGLN2 PE=1 SV=3 - [TAGL2_HUMAN]	75.38	13	14	188	199	22.3772	8.25049	0.992263	1.01341	1.0076	1.00442	1.00712	1.02894	1.09939	1.04515	1.04054	0.226851
O43306	Adenylate cyclase type 6 OS=Homo sapiens GN=ADCY6 PE=1 SV=2 - [ADCY6_HUMAN]	1.2	1	1	2	1168	130.531	8.22119		0.83482	0.921388	0.878104		0.816716	0.769847	0.793282	0.903403	0.226977
Q96F46	Interleukin-17 receptor A OS=Homo sapiens GN=IL17RA PE=1 SV=2 - [I17RA_HUMAN]	2.54	2	2	2	866	96.0608	5.21143	1.04402		1.19292	1.11847	1.01391		0.900617	0.957264	0.855868	0.226994
Q96M96	FYVE, RhoGEF and PH domain-containing protein 4 OS=Homo sapiens GN=FGD4 PE=1 SV=2 - [FGD4_HUMAN]	17.36	10	11	20	766	86.5714	6.12549	0.9859	0.960282	1.06376	1.00331	0.933789	0.926259	0.990792	0.95028	0.947141	0.227013
A8K6H9	cDNA FLJ75876, highly similar to Homo sapiens solute carrier family 38, member 2 (SLC38A2), mRNA OS=Homo sapiens PE=2 SV=1 - [A8K6H9_HUMAN]	14.03	5	5	9	506	56.0175	8.00146	0.995217	1.02159	0.911918	0.976241	1.00559	1.01761	1.07085	1.03135	1.05645	0.227133
R4GNH3	26S protease regulatory subunit 6A OS=Homo sapiens GN=PSMC3 PE=1 SV=1 - [R4GNH3_HUMAN]	52.72	19	19	122	423	47.3225	5.22412	1.01316	0.990104	0.98079	0.994686	1.00407	1.00607	1.04965	1.01993	1.02538	0.227216
P51153	Ras-related protein Rab-13 OS=Homo sapiens GN=RAB13 PE=1 SV=1 - [RAB13_HUMAN]	30.54	4	6	38	203	22.7597	9.18799	0.987827	0.999428	1.03878	1.00868	1.04024	1.04746	1.01586	1.03452	1.02562	0.227449
Q13535	Serine/threonine-protein kinase ATR OS=Homo sapiens GN=ATR PE=1 SV=3 - [ATR_HUMAN]	3.63	8	8	12	2644	301.172	7.43018	1.03383	1.10258	1.05203	1.06281	1.03058	1.03117	1.03821	1.03332	0.972251	0.227584
H7C2K6	Band 4.1-like protein 1 (Fragment) OS=Homo sapiens GN=EPB41L1 PE=1 SV=1 - [H7C2K6_HUMAN]	40.3	1	9	24	268	29.1438	5.63037		1.00885	0.992753	1.0008		1.11776	1.03269	1.07522	1.07436	0.227711
Q9H2J9	DC39 OS=Homo sapiens PE=2 SV=1 - [Q9H2J9_HUMAN]	10.77	1	2	4	195	22.3714	6.55127	0.944178	0.98004		0.962109	1.08283	0.998582		1.0407	1.08169	0.228153
C9JQA1	Polyglutamine-binding protein 1 (Fragment) OS=Homo sapiens GN=PQBP1 PE=1 SV=1 - [C9JQA1_HUMAN]	13.15	3	3	9	213	24.9202	5.74463	1.04076	0.904732	0.890674	0.945388	0.959816	1.17056	1.03817	1.05618	1.11719	0.228155
Q53GG0	Epithelial protein lost in neoplasm beta variant (Fragment) OS=Homo sapiens PE=2 SV=1 - [Q53GG0_HUMAN]	44.01	24	31	116	759	85.2014	6.84424	0.976602	0.984433	0.910222	0.957086	0.959816	1.02072	1.02559	1.00204	1.04697	0.228546
A8K097	cDNA FLJ78373, highly similar to Homo sapiens PCI domain containing 2, mRNA OS=Homo sapiens PE=2 SV=1 - [A8K097_HUMAN]	25.31	9	9	25	399	46.0008	8.33838	0.977861	1.02638	1.04667	1.01697	1.01283	0.972433	0.944318	0.976526	0.960231	0.228809
B2RAX6	cDNA, FLJ95176, Homo sapiens CGI-48 protein (CGI-48), mRNA OS=Homo sapiens PE=2 SV=1 - [B2RAX6_HUMAN]	16.89	7	7	14	521	57.6711	7.45947	1.06875	1.05536	0.983112	1.03574	0.818559	0.865548	1.07245	0.918852	0.887144	0.229009
E7EVH9	Pseudouridine-5'-phosphatase (Fragment) OS=Homo sapiens GN=PUDP PE=1 SV=1 - [E7EVH9_HUMAN]	11.52	2	2	3	191	21.4521	7.50342	0.974317	1.0954	1.14534	1.07169	0.911026	0.911106	1.07529	0.965806	0.901201	0.229138
Q86VM9	Zinc finger CCCH domain-containing protein 18 OS=Homo sapiens GN=ZC3H18 PE=1 SV=2 - [ZCH18_HUMAN]	8.08	6	6	10	953	106.316	8.32373	1.00768	0.984287	0.988953	0.993638	1.14095	1.06114	0.979417	1.0605	1.06729	0.229356
K7ESP4	Dephospho-CoA kinase domain-containing protein (Fragment) OS=Homo sapiens GN=DCAKD PE=1 SV=1 - [K7ESP4_HUMAN]	17.22	3	3	5	209	24.162	9.67139	0.988702	0.83283	0.971984	0.931172	0.998593	1.32238	0.985692	1.10222	1.18369	0.229454
Q01167	Forkhead box protein K2 OS=Homo sapiens GN=FOXK2 PE=1 SV=3 - [FOXK2_HUMAN]	3.94	2	2	3	660	69.0196	9.53955		0.998386	1.29929	1.14884		0.939261	0.684674	0.811968	0.706773	0.229516
A0A0S2Z5N2	Transmembrane protein 43 isoform 2 OS=Homo sapiens GN=TMEM43 PE=2 SV=1 - [A0A0S2Z5N2_HUMAN]	26.02	7	7	18	269	30.2443	6.87354	0.857395	0.982231	1.03419	0.957937	1.15704	0.983144	1.04432	1.0615	1.10811	0.229599
Q4G148	Glucoside xylosyltransferase 1 OS=Homo sapiens GN=GXYLT1 PE=1 SV=2 - [GXLT1_HUMAN]	8.18	3	3	6	440	50.5335	8.646	0.844623	0.893135		0.868879	1.12791	0.940507		1.03421	1.19028	0.22974
P62891	60S ribosomal protein L39 OS=Homo sapiens GN=RPL39 PE=1 SV=2 - [RL39_HUMAN]	19.61	1	1	6	51	6.40265	12.5571	1.16977	1.11032	0.965824	1.08197	0.860708	0.81406	1.10718	0.927316	0.857062	0.229832
Q8TB52	F-box only protein 30 OS=Homo sapiens GN=FBXO30 PE=1 SV=3 - [FBX30_HUMAN]	4.43	3	3	8	745	82.2508	5.40186	0.859968	0.893123	0.987015	0.913369	1.23379	0.87422	1.10739	1.0718	1.17346	0.230019
A0A087WUD1	Zinc finger protein 787 OS=Homo sapiens GN=ZNF787 PE=1 SV=1 - [A0A087WUD1_HUMAN]	12.57	3	3	4	382	40.4026	7.95752	1.00726	1.07508	1.00587	1.0294	1.05877	0.857768	0.890352	0.935631	0.908906	0.230401
P53701	Cytochrome c-type heme lyase OS=Homo sapiens GN=HCCS PE=1 SV=1 - [CCHL_HUMAN]	38.43	9	9	24	268	30.5818	6.68311	0.952439	0.968123	0.975646	0.965403	1.12476	1.05202	0.943901	1.04023	1.07751	0.23075
Q05D32	CTD small phosphatase-like protein 2 OS=Homo sapiens GN=CTDSPL2 PE=1 SV=2 - [CTSL2_HUMAN]	6.65	3	3	8	466	52.9661	6.40479	1.02766	0.974662	1.09194	1.03142	0.901261	1.00713	0.987125	0.965172	0.93577	0.231059
G3V167	Poly [ADP-ribose] polymerase OS=Homo sapiens GN=PARP2 PE=1 SV=1 - [G3V167_HUMAN]	6.03	3	3	5	531	60.1765	8.90967	0.930154	0.964773	1.03792	0.977614	1.22422	1.04326	0.992142	1.08654	1.11142	0.231267
O00487	26S proteasome non-ATPase regulatory subunit 14 OS=Homo sapiens GN=PSMD14 PE=1 SV=1 - [PSDE_HUMAN]	20.65	7	7	32	310	34.5546	6.52197	1.01308	0.937023	0.969029	0.973045	0.962006	1.0522	1.09686	1.03702	1.06575	0.231384
Q9H6L4	Armadillo repeat-containing protein 7 OS=Homo sapiens GN=ARMC7 PE=1 SV=1 - [ARMC7_HUMAN]	17.17	2	2	3	198	21.9103	6.0874	0.995472	1.01794		1.00671	1.06652	1.23409		1.1503	1.14264	0.23148
Q9BUL9	Ribonuclease P protein subunit p25 OS=Homo sapiens GN=RPP25 PE=1 SV=1 - [RPP25_HUMAN]	11.06	2	2	3	199	20.6196	9.61279	1.04664	1.06254		1.05459	0.961048	1.02922		0.995136	0.943623	0.231502
P26641	Elongation factor 1-gamma OS=Homo sapiens GN=EEF1G PE=1 SV=3 - [EF1G_HUMAN]	44.16	23	23	246	437	50.0871	6.66846	0.998249	0.958766	0.890679	0.949232	0.951805	1.0204	1.10159	1.0246	1.0794	0.231608
Q9HC52	Chromobox protein homolog 8 OS=Homo sapiens GN=CBX8 PE=1 SV=3 - [CBX8_HUMAN]	16.45	6	6	12	389	43.3694	9.90576	0.960818	0.913133	1.04084	0.971597	1.0677	1.05863	0.982775	1.03637	1.06666	0.231613
Q9ULR0	Pre-mRNA-splicing factor ISY1 homolog OS=Homo sapiens GN=ISY1 PE=1 SV=3 - [ISY1_HUMAN]	20	5	5	16	285	32.9719	5.17334	1.02094	1.01641	1.00862	1.01532	0.920847	1.03267	0.950422	0.967978	0.95337	0.232119
B4E0N1	cDNA FLJ58735, highly similar to Helicase SKI2W (EC 3.6.1.-) OS=Homo sapiens PE=2 SV=1 - [B4E0N1_HUMAN]	15.29	11	11	22	1053	116.382	6.55127	1.06743	1.01654	0.976174	1.02005	0.898684	0.985983	1.00081	0.961827	0.942923	0.23215
B2RE34	cDNA, FLJ96901, highly similar to Homo sapiens Rac GTPase activating protein 1 (RACGAP1), mRNA OS=Homo sapiens PE=2 SV=1 - [B2RE34_HUMAN]	19.78	12	12	36	632	70.9238	8.95361	1.00199	1.09673	1.11096	1.06989	1.0478	0.902086	1.0217	0.990528	0.925821	0.232192
A0A024RC67	Protein regulator of cytokinesis 1, isoform CRA_e OS=Homo sapiens GN=PRC1 PE=4 SV=1 - [A0A024RC67_HUMAN]	14.68	8	9	21	620	71.6196	6.56592	0.989617	1.0239	1.07254	1.02868	0.993182	1.01458	0.913312	0.973691	0.946541	0.232249
B7Z242	Amine oxidase [flavin-containing] OS=Homo sapiens PE=2 SV=1 - [B7Z242_HUMAN]	10.12	3	4	10	504	57.2224	7.51807	1.01918	0.953682	0.891928	0.954929	1.0046	1.03716	0.989162	1.01031	1.05799	0.232258
K7ELQ9	Transmembrane protein 205 (Fragment) OS=Homo sapiens GN=TMEM205 PE=1 SV=1 - [K7ELQ9_HUMAN]	22.94	3	3	16	170	19.2578	8.96826	0.958171	0.973109	1.04212	0.991134	1.09804	1.02313	1.01078	1.04398	1.05332	0.232299
P14635	G2/mitotic-specific cyclin-B1 OS=Homo sapiens GN=CCNB1 PE=1 SV=1 - [CCNB1_HUMAN]	15.7	6	6	7	433	48.3061	7.47412	1.0517	0.978188	1.30735	1.11241	0.920864	1.07254	0.824532	0.939313	0.844394	0.232498
P27694	Replication protein A 70 kDa DNA-binding subunit OS=Homo sapiens GN=RPA1 PE=1 SV=2 - [RFA1_HUMAN]	29.71	16	16	41	616	68.0953	7.21045	0.912403	0.9089	1.05849	0.959932	1.07891	1.08867	0.972498	1.04669	1.09038	0.232744
Q9H9B4	Sideroflexin-1 OS=Homo sapiens GN=SFXN1 PE=1 SV=4 - [SFXN1_HUMAN]	42.55	10	11	40	322	35.5963	9.0708	1.00802	0.977485	0.904288	0.963263	0.971841	1.0295	1.05353	1.01829	1.05712	0.232821
B4E1L0	Adenylosuccinate synthetase isozyme 2 OS=Homo sapiens GN=ADSS PE=2 SV=1 - [B4E1L0_HUMAN]	37.01	12	12	57	435	47.9086	5.90967	1.00108	1.01683	0.96419	0.994034	1.02533	0.997475	1.07139	1.0314	1.03759	0.232897
P30050	60S ribosomal protein L12 OS=Homo sapiens GN=RPL12 PE=1 SV=1 - [RL12_HUMAN]	67.27	9	9	76	165	17.8075	9.42236	1.05172	1.09283	0.958738	1.03443	0.881493	0.856339	1.05445	0.93076	0.899782	0.232942
A6N6J7	JARID1C protein OS=Homo sapiens GN=JARID1C PE=2 SV=1 - [A6N6J7_HUMAN]	4.38	5	5	7	1440	162.625	5.73193	1.0371	1.0654		1.05125	0.989127	0.813951		0.901539	0.857588	0.233585
B4DLT9	cDNA FLJ56462, highly similar to SAPS domain family member 1 OS=Homo sapiens PE=2 SV=1 - [B4DLT9_HUMAN]	8.33	2	2	2	396	43.1219	4.86865	0.868101		0.926174	0.897138	1.18387		0.975429	1.07965	1.20344	0.233665
H0YAN8	Rho guanine nucleotide exchange factor 10 (Fragment) OS=Homo sapiens GN=ARHGEF10 PE=1 SV=1 - [H0YAN8_HUMAN]	1.11	1	1	3	988	109.583	8.00146	0.994481	1.00774	1.22575	1.07599	0.994501	0.90219	0.991408	0.9627	0.89471	0.233789
Q96GM8	Target of EGR1 protein 1 OS=Homo sapiens GN=TOE1 PE=1 SV=1 - [TOE1_HUMAN]	10	4	4	5	510	56.512	7.18115	0.951148	1.04619		0.998667	1.08532	1.07351		1.07941	1.08085	0.233794
O95470	Sphingosine-1-phosphate lyase 1 OS=Homo sapiens GN=SGPL1 PE=1 SV=3 - [SGPL1_HUMAN]	16.2	9	9	21	568	63.4827	9.15869	0.985042	1.02997	0.924504	0.979839	0.995123	1.06265	1.03414	1.03064	1.05185	0.234122
Q9NQW6	Actin-binding protein anillin OS=Homo sapiens GN=ANLN PE=1 SV=2 - [ANLN_HUMAN]	29.98	31	31	58	1124	124.122	8.07471	0.990126	1.01951	1.28623	1.09862	0.967688	1.03525	0.802712	0.935217	0.851263	0.234354
Q6NUK1	Calcium-binding mitochondrial carrier protein SCaMC-1 OS=Homo sapiens GN=SLC25A24 PE=1 SV=2 - [SCMC1_HUMAN]	25.58	11	11	24	477	53.3203	6.32861	0.995081	0.954747	0.983708	0.977845	0.989946	1.06297	0.992726	1.01521	1.03821	0.234777
P06576	ATP synthase subunit beta, mitochondrial OS=Homo sapiens GN=ATP5B PE=1 SV=3 - [ATPB_HUMAN]	46.88	18	18	297	529	56.5246	5.40186	0.997048	1.01309	0.988219	0.999451	1.00896	1.00748	1.05843	1.02495	1.02552	0.234957
Q9Y4X5	E3 ubiquitin-protein ligase ARIH1 OS=Homo sapiens GN=ARIH1 PE=1 SV=2 - [ARI1_HUMAN]	7.9	4	4	10	557	64.0758	5.08447	0.858093	0.953677	0.961704	0.924491	1.20436	0.945392	0.987215	1.04566	1.13106	0.235643
A0A140VKC0	Testis tissue sperm-binding protein Li 37a OS=Homo sapiens PE=2 SV=1 - [A0A140VKC0_HUMAN]	22.57	9	9	17	505	56.992	6.37939	0.952462	0.971818	1.00573	0.976671	1.08575	1.10811	0.951217	1.04836	1.0734	0.235664
F1T0L5	ATP-dependent RNA helicase DDX51 OS=Homo sapiens GN=DDX51 PE=2 SV=1 - [F1T0L5_HUMAN]	9.76	6	6	10	666	72.4406	8.1626	1.10365	0.995618	0.938862	1.01271	0.910363	0.947677	0.966542	0.941527	0.929709	0.235836
C9JG41	Integral membrane protein 2C (Fragment) OS=Homo sapiens GN=ITM2C PE=1 SV=1 - [C9JG41_HUMAN]	16.11	2	2	4	180	20.0431	5.57959	1.00581	1.18425	1.27616	1.1554	1.13805	0.995205	0.701916	0.945058	0.817946	0.235853
H0YA26	Pantothenate kinase 4 (Fragment) OS=Homo sapiens GN=PANK4 PE=1 SV=1 - [H0YA26_HUMAN]	6.77	4	4	7	473	53.0409	6.30322	1.03185	1.00304	0.899856	0.978249	0.873258	0.930613	0.941489	0.91512	0.935467	0.236019
P48739	Phosphatidylinositol transfer protein beta isoform OS=Homo sapiens GN=PITPNB PE=1 SV=2 - [PIPNB_HUMAN]	60.52	12	14	43	271	31.5199	6.87354	1.01779	0.956844	0.87794	0.950857	0.951223	1.06032	1.0772	1.02958	1.08279	0.236262
Q53TB6	Putative uncharacterized protein MDA5 (Fragment) OS=Homo sapiens GN=MDA5 PE=4 SV=1 - [Q53TB6_HUMAN]	4.6	1	1	2	435	48.4234	4.71631	1.03398	1.27787		1.15592	0.989701	0.860034		0.924868	0.80011	0.236302
G9G6D7	KIAA0101 (Fragment) OS=Homo sapiens GN=KIAA0101 PE=4 SV=1 - [G9G6D7_HUMAN]	61.9	2	2	5	42	4.40639	11.854	1.22246	1.00886	1.87553	1.36895	1.05258	1.17558	0.260764	0.829641	0.606041	0.236348
Q53HS1	Achalasia, adrenocortical insufficiency, alacrimia (Allgrove, triple-A) variant (Fragment) OS=Homo sapiens PE=2 SV=1 - [Q53HS1_HUMAN]	14.84	7	7	12	546	59.5463	7.50342	0.866794	1.0276	1.00216	0.965517	1.23949	1.00531	1.02687	1.09056	1.12951	0.236464
Q9UPR3	Protein SMG5 OS=Homo sapiens GN=SMG5 PE=1 SV=3 - [SMG5_HUMAN]	1.77	2	2	3	1016	113.855	5.90967	0.848025	0.982819		0.915422	1.12089	1.00601		1.06345	1.16171	0.236562
F5H136	T-complex protein 1 subunit alpha (Fragment) OS=Homo sapiens GN=TCP1 PE=1 SV=1 - [F5H136_HUMAN]	88.24	1	10	61	136	14.4096	4.88135	1.05781	0.922601		0.990207	1.11997	1.09128		1.10562	1.11656	0.236866
Q93008	Probable ubiquitin carboxyl-terminal hydrolase FAF-X OS=Homo sapiens GN=USP9X PE=1 SV=3 - [USP9X_HUMAN]	11.52	25	26	48	2570	292.094	5.79541	0.976628	1.02402	1.01717	1.00594	1.00283	0.919603	0.976058	0.966165	0.96046	0.237277
Q5U0B3	Proteasome (Prosome, macropain) 26S subunit, non-ATPase, 8 OS=Homo sapiens PE=2 SV=1 - [Q5U0B3_HUMAN]	36.96	10	10	34	257	29.9026	7.28369	1.02737	0.974432	0.945718	0.982508	1.00099	1.0103	1.08487	1.03205	1.05043	0.237809
G9BXQ3	Tnk(C17Orf61) fusion protein OS=Homo sapiens PE=2 SV=1 - [G9BXQ3_HUMAN]	3.78	2	2	2	503	54.2862	8.52881	1.09855	1.00486		1.0517	0.908528	0.989149		0.948839	0.902193	0.237944
B5M450	Anion exchange protein OS=Homo sapiens GN=SLC4A7 PE=2 SV=1 - [B5M450_HUMAN]	7.11	7	7	13	1210	135.216	6.62451	0.954724	1.00745	0.887358	0.949843	1.05433	0.94387	1.07183	1.02334	1.07738	0.238005
Q5T2B5	Cullin-2 OS=Homo sapiens GN=CUL2 PE=1 SV=1 - [Q5T2B5_HUMAN]	12.46	10	10	23	706	82.3053	6.72705	1.0257	0.989012	0.979825	0.998179	1.00858	1.05522	1.01488	1.02623	1.0281	0.238178
H7C2J3	Regulator of microtubule dynamics protein 2 (Fragment) OS=Homo sapiens GN=RMDN2 PE=1 SV=1 - [H7C2J3_HUMAN]	16.67	2	2	3	150	17.3989	8.48486		1.0289	1.25117	1.14004		0.922169	0.977191	0.94968	0.833024	0.238274
A0A087X0W7	Acyl-coenzyme A thioesterase 2, mitochondrial OS=Homo sapiens GN=ACOT2 PE=1 SV=1 - [A0A087X0W7_HUMAN]	18.53	7	7	15	421	46.263	7.02002	0.969943	0.905999	1.01898	0.964975	1.06829	1.08789	0.956453	1.03754	1.0752	0.238322
B4DEY8	cDNA FLJ60452, highly similar to Cytochrome c oxidase assembly protein COX11, mitochondrial OS=Homo sapiens PE=2 SV=1 - [B4DEY8_HUMAN]	17.54	2	2	3	171	19.3587	5.31299	1.0288		1.01476	1.02178	0.962503		0.784892	0.873698	0.855075	0.238344
O95479	GDH/6PGL endoplasmic bifunctional protein OS=Homo sapiens GN=H6PD PE=1 SV=2 - [G6PE_HUMAN]	1.52	1	1	2	791	88.8364	7.29834		1.02356	1.02032	1.02194		0.905032	0.992853	0.948943	0.928568	0.238529
Q07812	Apoptosis regulator BAX OS=Homo sapiens GN=BAX PE=1 SV=1 - [BAX_HUMAN]	33.33	5	5	13	192	21.1708	5.22412	0.978927	0.958361	0.948857	0.962048	1.00446	1.19355	0.974738	1.05758	1.0993	0.238949
Q6NX51	Exocyst complex component 4 OS=Homo sapiens GN=EXOC4 PE=2 SV=1 - [Q6NX51_HUMAN]	10.88	9	9	19	974	110.429	6.49365	0.984515	0.978506	0.928443	0.963821	0.941746	0.909198	0.950338	0.933761	0.968811	0.239039
Q5T6Z8	Transmembrane protein 59 OS=Homo sapiens GN=TMEM59 PE=1 SV=1 - [Q5T6Z8_HUMAN]	11.98	2	2	3	192	21.8459	5.33838		1.18381	1.05097	1.11739		1.02315	0.851032	0.937093	0.838646	0.239077
P45973	Chromobox protein homolog 5 OS=Homo sapiens GN=CBX5 PE=1 SV=1 - [CBX5_HUMAN]	38.22	5	6	19	191	22.2111	5.85889	1.00939	0.935224	1.05038	0.998331	1.04068	1.1853	1.02348	1.08315	1.08496	0.239229
Q7Z3F8	Coiled-coil domain-containing protein 171 OS=Homo sapiens GN=DKFZp686I0230 PE=1 SV=1 - [Q7Z3F8_HUMAN]	3.47	1	1	2	317	37.6931	5.92236	1.0481		0.973037	1.01057	0.872474		0.958998	0.915736	0.906157	0.239602
Q8IZ20	Tissue-resident T-cell transcription regulator protein ZNF683 OS=Homo sapiens GN=ZNF683 PE=1 SV=3 - [ZN683_HUMAN]	2.29	1	1	2	524	56.8685	8.68994		1.19921	1.09046	1.14484		0.819339	1.04935	0.934344	0.816139	0.239823
E9PIF4	Sialidase-1 OS=Homo sapiens GN=NEU1 PE=1 SV=1 - [E9PIF4_HUMAN]	21.72	5	5	9	267	28.9815	5.97314	1.00294	1.01683	1.07518	1.03165	1.00907	0.830031	0.998825	0.945974	0.916951	0.239935
L0R5D5	Alternative protein TMEM70 OS=Homo sapiens GN=TMEM70 PE=4 SV=1 - [L0R5D5_HUMAN]	10.62	1	1	5	113	13.2477	6.52197	0.896992	1.0487	1.11876	1.02148	1.14806	1.05193	1.17687	1.12562	1.10195	0.240235
B2RDZ9	cDNA, FLJ96850 OS=Homo sapiens PE=2 SV=1 - [B2RDZ9_HUMAN]	32.3	7	7	34	291	31.8542	5.2749	1.01573	1.01114	0.99175	1.00621	1.00092	1.03804	1.04102	1.02666	1.02033	0.240358
E7ERU0	Dystonin OS=Homo sapiens GN=DST PE=1 SV=1 - [E7ERU0_HUMAN]	3.01	11	14	19	5375	615.272	5.74463	0.959042	1.00886	0.95655	0.974819	1.07573	0.964211	1.03675	1.02556	1.05206	0.240536
Q14126	Desmoglein-2 OS=Homo sapiens GN=DSG2 PE=1 SV=2 - [DSG2_HUMAN]	20.3	18	18	49	1118	122.218	5.23682	0.965238	1.05619	1.25183	1.09109	1.02388	0.982948	0.867176	0.958	0.878022	0.240755
P78406	mRNA export factor OS=Homo sapiens GN=RAE1 PE=1 SV=1 - [RAE1L_HUMAN]	30.98	10	10	22	368	40.9419	7.82568	0.99822	0.9906	0.965477	0.984765	0.978772	1.08408	1.02382	1.02889	1.04481	0.240846
Q7Z6K5	Arpin OS=Homo sapiens GN=ARPIN PE=1 SV=1 - [ARPIN_HUMAN]	13.72	3	3	6	226	24.9275	5.8335	1.01363	0.978605	0.878937	0.957057	0.991263	1.06147	1.00665	1.01979	1.06555	0.241122
D6RF48	Syntaxin-18 OS=Homo sapiens GN=STX18 PE=1 SV=1 - [D6RF48_HUMAN]	19.16	6	6	8	308	35.399	5.5542		0.96348	0.958327	0.960903		1.03604	0.979429	1.00773	1.04874	0.241184
B3KP90	cDNA FLJ31447 fis, clone NT2NE2000913, highly similar to Protein phosphatase 2C isoform beta (EC 3.1.3.16) OS=Homo sapiens PE=2 SV=1 - [B3KP90_HUMAN]	13.36	4	5	10	479	52.6764	5.04639	0.910163	1.01694	0.932897	0.953332	1.19051	0.955616	1.02947	1.05853	1.11035	0.241451
Q9HAT2	Sialate O-acetylesterase OS=Homo sapiens GN=SIAE PE=1 SV=1 - [SIAE_HUMAN]	6.5	3	3	5	523	58.2771	7.32764	0.934093	1.17518	1.11203	1.07377	1.03424	0.838186	0.968355	0.946925	0.881872	0.241523
Q6NUL1	Exostoses (Multiple) 2 OS=Homo sapiens GN=EXT2 PE=2 SV=1 - [Q6NUL1_HUMAN]	2.79	2	2	4	718	82.1418	6.55127		1.01976	1.07337	1.04657		1.00771	0.929929	0.968822	0.925715	0.241528
U3KQC1	WD repeat-containing protein 18 (Fragment) OS=Homo sapiens GN=WDR18 PE=1 SV=1 - [U3KQC1_HUMAN]	10.15	3	3	6	394	43.32	6.85889	0.971757	1.01222	0.98436	0.989445	1.07254	0.975972	1.04925	1.03259	1.0436	0.242107
H0YE25	Parkinson disease 7 domain-containing protein 1 (Fragment) OS=Homo sapiens GN=PDDC1 PE=1 SV=1 - [H0YE25_HUMAN]	29.17	3	3	5	144	15.4296	5.79541	0.998513	0.972407	1.01775	0.996224	1.02379	1.07333	0.997656	1.03159	1.0355	0.242166
Q5SGD2	Protein phosphatase 1L OS=Homo sapiens GN=PPM1L PE=1 SV=1 - [PPM1L_HUMAN]	6.67	2	2	2	360	41.027	5.87158		1.10417	1.12724	1.11571		0.974784	1.08007	1.02743	0.920877	0.243074
H3BRR0	Maspardin OS=Homo sapiens GN=SPG21 PE=1 SV=1 - [H3BRR0_HUMAN]	20.78	2	2	7	154	17.2466	5.30029	1.03396	1.04482	0.933867	1.00421	1.08909	1.03396	1.04942	1.05749	1.05305	0.243135
Q6IAJ3	TMEM9 protein OS=Homo sapiens GN=TMEM9 PE=2 SV=1 - [Q6IAJ3_HUMAN]	7.1	1	1	2	183	20.4884	6.96143		1.02761	1.31502	1.17131		0.984805	0.746013	0.865409	0.738836	0.243218
P31930	Cytochrome b-c1 complex subunit 1, mitochondrial OS=Homo sapiens GN=UQCRC1 PE=1 SV=3 - [QCR1_HUMAN]	44.17	14	14	73	480	52.6124	6.3667	1.00145	0.983593	1.02722	1.00409	0.939582	0.999776	0.982865	0.974074	0.970109	0.243226
B4DNM0	cDNA FLJ60738, highly similar to RNA polymerase-associated protein LEO1 OS=Homo sapiens PE=2 SV=1 - [B4DNM0_HUMAN]	4.04	2	2	2	644	72.7402	4.53857		0.934599	1.03486	0.984731		1.05015	1.11325	1.0817	1.09847	0.243259
Q92466	DNA damage-binding protein 2 OS=Homo sapiens GN=DDB2 PE=1 SV=1 - [DDB2_HUMAN]	22.01	8	8	13	427	47.8334	9.46631	1.04119	0.89979	0.917796	0.952924	1.01936	1.55716	1.03152	1.20268	1.2621	0.243524
P48444	Coatomer subunit delta OS=Homo sapiens GN=ARCN1 PE=1 SV=1 - [COPD_HUMAN]	41.68	19	19	102	511	57.1741	6.21436	0.996461	0.949729	0.991331	0.979174	1.04783	1.00209	0.985286	1.01173	1.03325	0.243704
Q5VTR2	E3 ubiquitin-protein ligase BRE1A OS=Homo sapiens GN=RNF20 PE=1 SV=2 - [BRE1A_HUMAN]	12.82	10	12	29	975	113.592	5.93506	0.997763	0.995562	1.06737	1.02023	1.01268	0.93512	0.979452	0.975751	0.9564	0.243757
P16383	GC-rich sequence DNA-binding factor 2 OS=Homo sapiens GN=GCFC2 PE=1 SV=2 - [GCFC2_HUMAN]	4.48	3	3	5	781	89.3294	5.98584	0.999593	0.998215	1.00989	1.00257	1.10012	0.974392	1.1235	1.066	1.06327	0.243764
P52756	RNA-binding protein 5 OS=Homo sapiens GN=RBM5 PE=1 SV=2 - [RBM5_HUMAN]	6.01	3	5	9	815	92.097	6.27783	1.03184	0.956978	0.959421	0.982746	1.09704	1.06655	0.970439	1.04468	1.06302	0.243965
H0YID3	Serine dehydratase-like (Fragment) OS=Homo sapiens GN=SDSL PE=1 SV=1 - [H0YID3_HUMAN]	16.44	3	3	6	225	23.9024	6.18896	0.842319	1.05386	0.907732	0.934638	1.154	0.931082	1.09251	1.0592	1.13327	0.244034
Q15057	Arf-GAP with coiled-coil, ANK repeat and PH domain-containing protein 2 OS=Homo sapiens GN=ACAP2 PE=1 SV=3 - [ACAP2_HUMAN]	7.84	6	6	7	778	87.9732	6.80029	0.983788	1.01068		0.997232	0.978981	0.968184		0.973582	0.976285	0.244185
B7Z341	cDNA FLJ54521, highly similar to Protein NDRG3 OS=Homo sapiens PE=2 SV=1 - [B7Z341_HUMAN]	12.55	3	3	9	271	29.7019	5.59229	0.817326	0.908662	1.02311	0.916367	1.31812	1.00876	0.949298	1.09206	1.19173	0.244556
A0A140VJN8	Perilipin OS=Homo sapiens PE=2 SV=1 - [A0A140VJN8_HUMAN]	54.5	18	18	77	433	46.9179	5.43994	0.979102	0.984631	1.01297	0.992233	1.10702	1.00997	1.00329	1.04009	1.04823	0.244681
B4DPP5	cDNA FLJ59157, highly similar to CRSP complex subunit 8 OS=Homo sapiens PE=2 SV=1 - [B4DPP5_HUMAN]	9.09	2	2	2	253	28.628	9.53955		1.04821	0.946666	0.997439		0.886262	0.929122	0.907692	0.910023	0.244967
A0A087WZY2	Mitochondrial import receptor subunit TOM7 homolog OS=Homo sapiens GN=TOMM7 PE=1 SV=1 - [A0A087WZY2_HUMAN]	12.73	1	1	2	55	6.34546	10.272	0.999441		1.06742	1.03343	0.985291		0.886972	0.936132	0.90585	0.245064
B2R9J4	cDNA, FLJ94423, highly similar to Homo sapiens mitochondrial ribosomal protein L23 (MRPL23), nuclear gene encoding mitochondrial protein, mRNA OS=Homo sapiens PE=2 SV=1 - [B2R9J4_HUMAN]	16.34	2	2	6	153	17.7861	9.68604	1.03214	0.976086	0.935079	0.981102	0.987989	1.03496	1.07264	1.03186	1.05174	0.245113
P53007	Tricarboxylate transport protein, mitochondrial OS=Homo sapiens GN=SLC25A1 PE=1 SV=2 - [TXTP_HUMAN]	31.51	10	10	34	311	33.991	9.89111	0.918567	1.00723	1.02517	0.983657	1.10053	1.02205	1.00739	1.04332	1.06066	0.245165
P55084	Trifunctional enzyme subunit beta, mitochondrial OS=Homo sapiens GN=HADHB PE=1 SV=3 - [ECHB_HUMAN]	46.84	21	21	95	474	51.2615	9.40771	0.954007	1.01306	1.0005	0.989191	1.09256	1.02589	0.991076	1.03651	1.04784	0.245184
Q9H4L7	SWI/SNF-related matrix-associated actin-dependent regulator of chromatin subfamily A containing DEAD/H box 1 OS=Homo sapiens GN=SMARCAD1 PE=1 SV=2 - [SMRCD_HUMAN]	3.51	3	3	3	1026	117.328	5.5542	0.78535	1.00094	1.09756	0.961285	1.46439	1.04431	1.05396	1.18755	1.23538	0.245458
R4GN18	Membrane cofactor protein (Fragment) OS=Homo sapiens GN=CD46 PE=1 SV=1 - [R4GN18_HUMAN]	16.67	1	1	2	78	8.4965	9.0708		1.08831	1.03729	1.0628		1.01711	0.898019	0.957567	0.900981	0.245763
B1Q2B0	URCC5 OS=Homo sapiens GN=URCC5 PE=2 SV=1 - [B1Q2B0_HUMAN]	2.63	1	1	4	911	101.244	8.42627	0.944205	0.961104	0.780356	0.895222	1.31428	0.953232	0.958427	1.07531	1.20117	0.246173
Q562Z4	Actin-like protein (Fragment) OS=Homo sapiens GN=ACT PE=4 SV=1 - [Q562Z4_HUMAN]	54.37	2	3	396	103	11.548	7.57666	1.17002	1.06226		1.11614	0.712263	1.0086		0.860431	0.770897	0.246284
Q96DI9	POLDIP3 protein (Fragment) OS=Homo sapiens GN=POLDIP3 PE=2 SV=2 - [Q96DI9_HUMAN]	33.81	11	11	30	417	45.6303	10.0376	1.03226	1.00696	1.01528	1.01817	0.982976	0.962398	1.0265	0.990624	0.972949	0.246536
B4DED6	cDNA FLJ56545, highly similar to ATP-dependent RNA helicase DDX50 (EC 3.6.1.-) OS=Homo sapiens PE=2 SV=1 - [B4DED6_HUMAN]	21	10	13	35	643	72.113	8.51416	1.00912	1.06499	0.990079	1.0214	0.944372	0.995197	1.00527	0.981614	0.96105	0.24655
Q9UKL6	Phosphatidylcholine transfer protein OS=Homo sapiens GN=PCTP PE=1 SV=1 - [PPCT_HUMAN]	11.21	3	3	7	214	24.8273	5.78271	0.829834	0.938765	0.969478	0.912692	1.11237	1.10516	0.877851	1.0318	1.1305	0.246832
Q6DD88	Atlastin-3 OS=Homo sapiens GN=ATL3 PE=1 SV=1 - [ATLA3_HUMAN]	21.07	10	10	34	541	60.5034	5.65576	1.01407	0.956131	0.969048	0.97975	1.02941	0.991976	1.00242	1.00793	1.02877	0.246964
P78545	ETS-related transcription factor Elf-3 OS=Homo sapiens GN=ELF3 PE=1 SV=1 - [ELF3_HUMAN]	9.7	3	3	8	371	41.4282	5.77002	0.941112	1.02061	1.12471	1.02881	0.973875	0.9671	0.917811	0.952929	0.926244	0.247
H7C5E4	5'-3' exoribonuclease 1 (Fragment) OS=Homo sapiens GN=XRN1 PE=1 SV=1 - [H7C5E4_HUMAN]	6.98	7	7	9	1160	130.107	8.32373	1.00775	0.966595	1.03297	1.00244	0.972913	0.977996	0.977521	0.976143	0.973771	0.247012
Q8NFU3	Thiosulfate sulfurtransferase/rhodanese-like domain-containing protein 1 OS=Homo sapiens GN=TSTD1 PE=1 SV=3 - [TSTD1_HUMAN]	13.91	2	2	3	115	12.5224	6.07471	1.06719	0.98842	1.06001	1.03854	0.99076	0.907655	1.03466	0.977691	0.941408	0.247126
Q8WXH0	Nesprin-2 OS=Homo sapiens GN=SYNE2 PE=1 SV=3 - [SYNE2_HUMAN]	8.64	53	53	92	6885	795.944	5.36377	0.973428	1.09562	1.10731	1.05878	1.04505	0.922991	0.983202	0.983749	0.92913	0.247394
B4DWC4	Chloride intracellular channel protein OS=Homo sapiens PE=2 SV=1 - [B4DWC4_HUMAN]	33.06	8	8	20	245	27.8003	6.37939	1.02225	1.04634	0.901039	0.989875	1.03591	1.03364	1.10665	1.05873	1.06956	0.247897
P20962	Parathymosin OS=Homo sapiens GN=PTMS PE=1 SV=2 - [PTMS_HUMAN]	22.55	3	3	12	102	11.5232	4.15771	0.890859	0.849172	1.00521	0.915081	1.20902	1.06401	0.890557	1.05453	1.15239	0.247977
B3KW38	cDNA FLJ42082 fis, clone TCERX2000171, highly similar to CLAUDIN-4 OS=Homo sapiens PE=2 SV=1 - [B3KW38_HUMAN]	17.86	2	3	17	196	20.5026	8.29443	0.908852	0.87678	0.987519	0.924384	1.10694	1.10411	0.886607	1.03255	1.11702	0.247979
Q9NWB6	Arginine and glutamate-rich protein 1 OS=Homo sapiens GN=ARGLU1 PE=1 SV=1 - [ARGL1_HUMAN]	16.85	6	6	9	273	33.1968	10.3452	0.950929	0.999438	1.00779	0.986051	1.0775	1.14194	0.962844	1.06076	1.07577	0.248001
Q96BW5	Phosphotriesterase-related protein OS=Homo sapiens GN=PTER PE=1 SV=1 - [PTER_HUMAN]	8.31	3	3	6	349	38.993	6.52197	0.989942	0.909009	0.910051	0.936334	1.02771	0.921586	1.06481	1.0047	1.07302	0.24801
Q0H0I7	Vestigial-like 4 (Fragment) OS=Homo sapiens GN=VGLL4 PE=4 SV=1 - [Q0H0I7_HUMAN]	10.73	2	2	3	205	21.5607	8.92432		1.00172	1.13268	1.0672		0.984395	0.876802	0.930599	0.872	0.248313
Q8WWQ0	PH-interacting protein OS=Homo sapiens GN=PHIP PE=1 SV=2 - [PHIP_HUMAN]	3.46	5	5	9	1821	206.56	8.85107	1.01007	0.987912	0.978562	0.99218	1.02949	0.984715	1.04318	1.01913	1.02716	0.248601
Q86WU2	Probable D-lactate dehydrogenase, mitochondrial OS=Homo sapiens GN=LDHD PE=1 SV=1 - [LDHD_HUMAN]	2.96	1	1	2	507	54.8357	6.65381	0.93337	0.955748		0.944559	1.01076	0.963097		0.986927	1.04486	0.248813
H3BPU4	Gamma-tubulin complex component (Fragment) OS=Homo sapiens GN=TUBGCP4 PE=1 SV=1 - [H3BPU4_HUMAN]	6.3	2	2	2	397	44.9873	5.8335	1.01044	1.15068		1.08056	0.990385	0.840954		0.915669	0.847403	0.248844
B2R802	cDNA, FLJ93681, highly similar to Homo sapiens small nuclear ribonucleoprotein polypeptide A (SNRPA), mRNA OS=Homo sapiens PE=2 SV=1 - [B2R802_HUMAN]	14.54	3	5	27	282	31.2872	9.86182	1.03628	0.945364	0.808679	0.930107	0.964362	1.05551	1.06853	1.02946	1.10682	0.249521
Q53G19	Mitochondrial ribosomal protein L11 isoform a variant (Fragment) OS=Homo sapiens PE=2 SV=1 - [Q53G19_HUMAN]	43.75	7	7	25	192	20.6424	9.90576	0.96216	0.967804	1.00405	0.978003	1.00144	1.02392	0.981297	1.00222	1.02476	0.249576
B3KSJ3	cDNA FLJ36409 fis, clone THYMU2010448, highly similar to Regulator of nonsense transcripts 3B OS=Homo sapiens PE=2 SV=1 - [B3KSJ3_HUMAN]	7.02	3	3	5	470	56.0802	9.39307	0.98648	0.949506	0.921006	0.952331	0.937203	1.03574	1.1864	1.05311	1.10583	0.249635
B7ZL14	FNBP1 protein OS=Homo sapiens GN=FNBP1 PE=1 SV=1 - [B7ZL14_HUMAN]	2.36	2	2	2	551	64.0315	5.23682	0.861156		0.896464	0.87881	0.96507		0.904709	0.93489	1.06381	0.249933
Q2NL82	Pre-rRNA-processing protein TSR1 homolog OS=Homo sapiens GN=TSR1 PE=1 SV=1 - [TSR1_HUMAN]	16.54	11	11	27	804	91.7519	7.41553	1.09649	1.1511	0.984262	1.07728	0.835532	0.87977	1.11488	0.943393	0.875714	0.250163
Q96FF9	Sororin OS=Homo sapiens GN=CDCA5 PE=1 SV=1 - [CDCA5_HUMAN]	23.41	4	4	9	252	27.5834	9.61279	0.937423	0.930039	1.07881	0.982089	1.14819	1.20897	0.95442	1.10386	1.12399	0.250722
H0Y5R6	Uroporphyrinogen decarboxylase (Fragment) OS=Homo sapiens GN=UROD PE=1 SV=1 - [H0Y5R6_HUMAN]	26.75	5	5	14	228	25.408	5.31299	1.02643	1.01189	0.924308	0.987541	1.02383	1.03365	1.03422	1.03057	1.04357	0.250857
B3KRT9	cDNA FLJ34915 fis, clone NT2RP7001283, highly similar to Homo sapiens mSin3A-associated protein 130 (SAP130), mRNA OS=Homo sapiens PE=2 SV=1 - [B3KRT9_HUMAN]	4.53	3	3	3	685	72.829	9.59814		1.16037	1.00378	1.08207		0.959913	0.953609	0.956761	0.884192	0.250899
H3BMW7	Transmembrane protein 231 OS=Homo sapiens GN=TMEM231 PE=1 SV=1 - [H3BMW7_HUMAN]	11.32	1	1	4	106	12.1565	9.979	0.968467	1.088	1.20494	1.08714	1.01076	0.920147	1.0257	0.985534	0.906541	0.251252
E7EVY0	Mitochondrial inner membrane protein OXA1L OS=Homo sapiens GN=OXA1L PE=1 SV=1 - [E7EVY0_HUMAN]	13.97	6	6	22	408	45.1367	9.17334	0.993766	0.993323	0.978393	0.988494	0.987656	1.07125	1.0093	1.02273	1.03464	0.251294
Q7L576	Cytoplasmic FMR1-interacting protein 1 OS=Homo sapiens GN=CYFIP1 PE=1 SV=1 - [CYFP1_HUMAN]	27.53	15	30	93	1253	145.089	6.90283	0.958947	0.990567	0.98156	0.977025	1.05523	0.965957	1.02101	1.01406	1.03791	0.251458
P43487	Ran-specific GTPase-activating protein OS=Homo sapiens GN=RANBP1 PE=1 SV=1 - [RANG_HUMAN]	39.3	8	8	43	201	23.2956	5.2876	1.02925	0.952497	0.845047	0.942265	0.971678	1.02601	1.07432	1.024	1.08675	0.251936
Q59GT1	Conserved helix-loop-helix ubiquitous kinase variant (Fragment) OS=Homo sapiens PE=2 SV=1 - [Q59GT1_HUMAN]	3.72	3	3	4	726	82.3912	7.40088	0.836295	0.941161		0.888728	1.29404	0.992436		1.14324	1.28638	0.251948
B7ZMF2	Fanconi anemia, complementation group I OS=Homo sapiens GN=FANCI PE=2 SV=1 - [B7ZMF2_HUMAN]	18.98	21	21	42	1328	149.241	6.7417	0.988064	1.04615	0.991893	1.0087	1.01554	0.929444	0.953659	0.966214	0.957877	0.252002
E7ESU0	Ubiquitin carboxyl-terminal hydrolase 19 (Fragment) OS=Homo sapiens GN=USP19 PE=1 SV=2 - [E7ESU0_HUMAN]	2.54	2	2	3	1180	130.941	6.12549	1.0095	1.19438		1.10194	0.98042	0.739467		0.859943	0.78039	0.252049
Q05BX6	RABEP1 protein (Fragment) OS=Homo sapiens GN=RABEP1 PE=2 SV=1 - [Q05BX6_HUMAN]	4.89	2	2	4	716	82.3265	5.13525	1.08561	1.1774	1.03879	1.1006	0.994975	0.922671	1.11064	1.00943	0.917162	0.252365
Q49AR2	UPF0489 protein C5orf22 OS=Homo sapiens GN=C5orf22 PE=1 SV=2 - [CE022_HUMAN]	17.65	7	7	9	442	49.9355	4.77979	1.01219	0.981517	0.81744	0.937048	1.02597	0.986867	1.05213	1.02166	1.09029	0.252686
Q86VR6	DDX10 protein (Fragment) OS=Homo sapiens GN=DDX10 PE=2 SV=1 - [Q86VR6_HUMAN]	6.17	5	5	10	745	85.7782	9.21729	1.02589	1.04522	0.970111	1.01374	0.973381	0.922576	1.00972	0.968558	0.955429	0.252808
P68036	Ubiquitin-conjugating enzyme E2 L3 OS=Homo sapiens GN=UBE2L3 PE=1 SV=1 - [UB2L3_HUMAN]	72.08	7	8	45	154	17.8502	8.51416	1.01089	0.946478	0.895964	0.951112	0.98553	0.978287	1.14759	1.03714	1.09045	0.253187
B2RDD7	Protein arginine N-methyltransferase 5 OS=Homo sapiens PE=2 SV=1 - [B2RDD7_HUMAN]	28.73	15	15	48	637	72.6636	6.29053	0.972807	1.00417	0.9825	0.986494	1.061	1.05707	0.968163	1.02874	1.04283	0.253431
A9QQ22	Actin nucleation promoting factor (Fragment) OS=Homo sapiens GN=WASH PE=4 SV=1 - [A9QQ22_HUMAN]	14.88	2	5	6	410	43.7957	5.57959	0.971107		1.11106	1.04108	0.951624		0.883904	0.917764	0.881548	0.253554
B2R6U9	Delta-like protein OS=Homo sapiens PE=2 SV=1 - [B2R6U9_HUMAN]	5.67	6	6	9	1218	133.769	6.06201	1.06813	0.969116	0.934648	0.990631	0.839652	0.992547	0.900972	0.911057	0.919673	0.253972
P61026	Ras-related protein Rab-10 OS=Homo sapiens GN=RAB10 PE=1 SV=1 - [RAB10_HUMAN]	66.5	11	14	80	200	22.5266	8.38232	0.982226	0.970874	1.04658	0.999894	1.0208	1.03651	1.03926	1.03219	1.0323	0.253977
A8KAQ6	cDNA FLJ76490, highly similar to Homo sapiens ancient ubiquitous protein 1 (AUP1), transcript variant 2, mRNA OS=Homo sapiens PE=2 SV=1 - [A8KAQ6_HUMAN]	19.76	7	7	14	410	45.7771	8.79248	0.780806	1.02414	1.04414	0.949696	1.11385	1.05467	1.0321	1.06688	1.12339	0.254185
A0A090N8Q5	NEDD8 ultimate buster-1 OS=Homo sapiens GN=NYREN18 PE=4 SV=1 - [A0A090N8Q5_HUMAN]	5.16	3	3	5	601	69.0754	5.97314	0.976725	1.03216	0.93487	0.981251	0.925228	0.976742	0.893279	0.931749	0.949552	0.254247
H0Y818	DNA mismatch repair protein Mlh1 (Fragment) OS=Homo sapiens GN=MLH1 PE=1 SV=1 - [H0Y818_HUMAN]	15.02	8	8	9	679	75.8106	6.12549	1.02753	1.07358	1.08224	1.06112	0.907811	1.08168	0.981764	0.990419	0.933376	0.254346
Q9BVJ7	Dual specificity protein phosphatase 23 OS=Homo sapiens GN=DUSP23 PE=1 SV=1 - [DUS23_HUMAN]	20.67	3	3	4	150	16.5776	8.20654	1.19135	1.05758	0.956478	1.06847	0.942482	1.05361	0.852182	0.949426	0.888586	0.254506
A8KAM7	cDNA FLJ75421, highly similar to Homo sapiens lung seven transmembrane receptor 1 (LUSTR1) mRNA OS=Homo sapiens PE=2 SV=1 - [A8KAM7_HUMAN]	3.8	2	2	4	552	61.8924	7.1958	0.911695		1.03013	0.970913	1.12507		1.04374	1.0844	1.11689	0.254906
Q05BM8	Polypeptide N-acetylgalactosaminyltransferase OS=Homo sapiens GN=GALNT1 PE=2 SV=1 - [Q05BM8_HUMAN]	12.83	5	6	14	499	57.2999	7.78174	0.960415	1.07609	1.00997	1.01549	1.0101	0.922124	0.94449	0.958905	0.944274	0.255311
Q969L2	Protein MAL2 OS=Homo sapiens GN=MAL2 PE=1 SV=1 - [MAL2_HUMAN]	6.25	1	1	4	176	19.1127	6.23975	1.0355	0.969581	0.978207	0.994428	0.995768	1.10032	1.03394	1.04334	1.04919	0.255509
B4DRY5	cDNA FLJ54538, highly similar to Transportin-2 OS=Homo sapiens PE=2 SV=1 - [B4DRY5_HUMAN]	12.73	5	10	27	880	99.6012	4.98291	0.962297	1.01452	0.929372	0.968728	1.21176	0.988307	1.007	1.06902	1.10353	0.256066
Q02338	D-beta-hydroxybutyrate dehydrogenase, mitochondrial OS=Homo sapiens GN=BDH1 PE=1 SV=3 - [BDH_HUMAN]	26.82	7	7	9	343	38.1325	8.95361	0.965675	1.01881	1.00643	0.996972	1.02206	1.01768	1.01539	1.01837	1.02147	0.256196
Q8IVQ8	XPO4 protein (Fragment) OS=Homo sapiens GN=XPO4 PE=2 SV=1 - [Q8IVQ8_HUMAN]	3.87	3	4	7	1008	113.963	4.86865	0.994373		1.22839	1.11138	0.956046		0.879595	0.917821	0.825839	0.256469
B3KRD8	SEC14-like 2 (S. cerevisiae), isoform CRA_c OS=Homo sapiens GN=SEC14L2 PE=1 SV=1 - [B3KRD8_HUMAN]	9.42	2	2	2	329	37.4311	7.84033	0.552054	0.878668		0.715361	1.48827	0.942362		1.21532	1.69889	0.25661
Q03164	Histone-lysine N-methyltransferase 2A OS=Homo sapiens GN=KMT2A PE=1 SV=5 - [KMT2A_HUMAN]	1.89	7	7	14	3969	431.497	9.08545	1.02218	1.0416	1.04778	1.03719	1.05019	0.992454	0.95802	1.00022	0.964359	0.256847
A8K2F4	cDNA FLJ75620 OS=Homo sapiens PE=2 SV=1 - [A8K2F4_HUMAN]	3.05	2	2	3	755	85.6899	6.39209	0.75009	1.0236	1.01794	0.930544	0.85994	0.795769	0.759796	0.805168	0.865266	0.25686
A6NNK5	Tumor suppressor p53-binding protein 1 OS=Homo sapiens GN=TP53BP1 PE=1 SV=2 - [A6NNK5_HUMAN]	10.74	16	16	33	1927	208.89	4.66553	1.02492	1.01233	1.01672	1.01799	0.975988	1.03005	0.972998	0.993014	0.975462	0.256884
A0A0A0MRB5	MAP kinase-activating death domain protein OS=Homo sapiens GN=MADD PE=1 SV=1 - [A0A0A0MRB5_HUMAN]	2.14	2	2	3	1588	176.444	6.12549	0.88126	0.893869	1.08341	0.952847	1.32385	1.06483	0.965935	1.11821	1.17354	0.256919
Q4ZG57	DNA helicase (Fragment) OS=Homo sapiens GN=MCM6 PE=3 SV=1 - [Q4ZG57_HUMAN]	37.2	25	25	86	785	88.8903	5.60498	1.03212	0.991036	1.03451	1.01922	0.929063	1.03912	0.939946	0.969378	0.951096	0.257199
A0A0A6YY96	Iron-responsive element-binding protein 2 OS=Homo sapiens GN=IREB2 PE=1 SV=1 - [A0A0A6YY96_HUMAN]	8.31	7	7	17	963	104.992	7.04932	1.00348	1.0093	1.17031	1.06103	1.04163	0.966838	0.91186	0.973442	0.91745	0.257283
Q9BVI4	Nucleolar complex protein 4 homolog OS=Homo sapiens GN=NOC4L PE=1 SV=1 - [NOC4L_HUMAN]	21.71	12	12	26	516	58.4307	7.48877	1.08987	1.16819	0.978339	1.0788	0.895394	0.777409	1.11517	0.929324	0.861445	0.257403
Q8IXH7	Negative elongation factor C/D OS=Homo sapiens GN=NELFCD PE=1 SV=2 - [NELFD_HUMAN]	16.27	8	8	17	590	66.2043	5.09717	1.0256	1.04827	1.06968	1.04785	0.992518	1.05021	1.01776	1.02016	0.97358	0.257714
Q06DW9	WDR13 OS=Homo sapiens GN=WDR13 PE=2 SV=1 - [Q06DW9_HUMAN]	9.92	2	2	6	363	39.6287	7.82568	0.96373	0.972431	0.863879	0.933347	1.06564	0.96287	0.964148	0.997551	1.06879	0.25781
A0A0A0MSK5	Torsin-1A-interacting protein 1 OS=Homo sapiens GN=TOR1AIP1 PE=1 SV=1 - [A0A0A0MSK5_HUMAN]	30.09	11	12	35	462	52.3743	7.06396	0.999877	1.03782	1.03015	1.02262	1.03452	0.974583	0.94524	0.98478	0.963001	0.257981
B2RCM2	cDNA, FLJ96156, highly similar to Homo sapiens leucyl-tRNA synthetase (LARS), mRNA OS=Homo sapiens PE=2 SV=1 - [B2RCM2_HUMAN]	34.27	37	37	115	1176	134.352	7.1958	0.991381	0.991308	0.979136	0.987275	0.990075	1.00116	1.06755	1.01959	1.03274	0.258041
Q13813	Spectrin alpha chain, non-erythrocytic 1 OS=Homo sapiens GN=SPTAN1 PE=1 SV=3 - [SPTN1_HUMAN]	52.59	116	118	428	2472	284.364	5.35107	0.997077	0.999499	0.960981	0.985852	0.992152	1.00399	1.02013	1.00542	1.01985	0.258239
A0A024R3E0	Interleukin 18 (Interferon-gamma-inducing factor), isoform CRA_a OS=Homo sapiens GN=IL18 PE=3 SV=1 - [A0A024R3E0_HUMAN]	9.52	2	2	5	189	21.8817	4.77979	1.01509	0.883015	0.839144	0.912417	1.01132	1.01118	0.942446	0.988315	1.08318	0.258263
Q9BZS5	PNAS-122 OS=Homo sapiens PE=2 SV=1 - [Q9BZS5_HUMAN]	23.15	2	2	5	108	11.7683	9.49561	1.05034	1.07112	1.01618	1.04588	0.835236	0.997096	1.046	0.959444	0.917357	0.258471
O94804	Serine/threonine-protein kinase 10 OS=Homo sapiens GN=STK10 PE=1 SV=1 - [STK10_HUMAN]	6.3	4	6	10	968	112.065	6.94678	0.955445		0.997332	0.976389	1.02181		1.00284	1.01233	1.03681	0.258478
Q9NVH0	Exonuclease 3'-5' domain-containing protein 2 OS=Homo sapiens GN=EXD2 PE=1 SV=2 - [EXD2_HUMAN]	12.88	6	6	13	621	70.3083	8.32373	0.940536	0.951906	1.04869	0.980379	1.10356	1.04352	0.985157	1.04408	1.06498	0.25877
A0A024RBC7	Calcium-transporting ATPase OS=Homo sapiens GN=ATP2B1 PE=3 SV=1 - [A0A024RBC7_HUMAN]	8.77	8	8	15	1220	134.6	5.90967	0.954707	1.02721	0.862551	0.948156	1.04717	0.993627	1.00258	1.01446	1.06993	0.258991
P39748	Flap endonuclease 1 OS=Homo sapiens GN=FEN1 PE=1 SV=1 - [FEN1_HUMAN]	33.16	13	13	40	380	42.5661	8.6167	1.0125	1.00043	0.914809	0.975913	0.998794	1.09269	1.00596	1.03248	1.05796	0.25945
B4DGL8	ATP-binding cassette sub-family B member 7, mitochondrial (Fragment) OS=Homo sapiens GN=ABCB7 PE=1 SV=1 - [B4DGL8_HUMAN]	9.83	5	5	8	702	77.0724	9.42236	0.993612	1.04017	1.0796	1.03779	1.04496	0.975544	0.920919	0.980475	0.94477	0.259458
O60870	DNA/RNA-binding protein KIN17 OS=Homo sapiens GN=KIN PE=1 SV=2 - [KIN17_HUMAN]	7.38	3	3	5	393	45.3454	8.95361	1.01734	1.02519	1.0269	1.02314	1.02375	0.997734	0.902512	0.974665	0.952617	0.259929
Q9P1Y5	Calmodulin-regulated spectrin-associated protein 3 OS=Homo sapiens GN=CAMSAP3 PE=1 SV=2 - [CAMP3_HUMAN]	6.73	6	6	13	1249	134.666	8.35303	0.876399	0.904992	0.921597	0.900996	1.15921	1.0218	0.862736	1.01458	1.12607	0.260199
C9J167	Mismatch repair endonuclease PMS2 OS=Homo sapiens GN=PMS2 PE=1 SV=2 - [C9J167_HUMAN]	6.75	4	4	4	756	84.6437	8.19189	0.990948	1.03943		1.01519	0.924519	0.60617		0.765344	0.753892	0.260899
F5H669	Cleavage and polyadenylation-specificity factor subunit 7 (Fragment) OS=Homo sapiens GN=CPSF7 PE=1 SV=1 - [F5H669_HUMAN]	23.8	9	9	27	374	41.2407	7.02002	1.04238	0.984497	0.893968	0.973617	1.01036	1.06663	1.02568	1.03422	1.06225	0.261016
D3DPC4	Uncharacterized protein OS=Homo sapiens GN=FLJ21901 PE=4 SV=1 - [D3DPC4_HUMAN]	3.03	2	2	2	824	94.7014	7.92822	1.02878	1.03662		1.0327	0.948118	1.01414		0.981131	0.950063	0.261017
Q5T2E6	UPF0668 protein C10orf76 OS=Homo sapiens GN=C10orf76 PE=1 SV=1 - [CJ076_HUMAN]	7.55	4	4	4	689	78.6594	6.59521	0.443207	0.956256		0.699732	1.46755	1.00392		1.23573	1.76601	0.261221
Q8N3C0	Activating signal cointegrator 1 complex subunit 3 OS=Homo sapiens GN=ASCC3 PE=1 SV=3 - [ASCC3_HUMAN]	7.58	14	14	20	2202	251.301	7.09326	1.04344	1.11349	0.950644	1.03586	0.906574	0.760096	1.05756	0.908076	0.876642	0.262126
Q9NVH2	Integrator complex subunit 7 OS=Homo sapiens GN=INTS7 PE=1 SV=1 - [INT7_HUMAN]	2.91	2	2	4	962	106.766	8.01611	0.951112	1.09466	1.05722	1.03433	1.0688	0.823923	0.87253	0.921751	0.891158	0.262139
Q86YV5	Tyrosine-protein kinase SgK223 OS=Homo sapiens GN=SGK223 PE=1 SV=4 - [SG223_HUMAN]	5.9	7	7	11	1406	149.529	7.1958	0.963498	1.04265	0.979141	0.995096	1.00596	0.928849	0.866001	0.933602	0.938204	0.262194
J3QSA1	Trafficking protein particle complex subunit 8 OS=Homo sapiens GN=TRAPPC8 PE=1 SV=1 - [J3QSA1_HUMAN]	3.75	2	2	2	666	75.1958	7.2251		0.99889	1.09262	1.04575		0.885953	0.989576	0.937764	0.896735	0.262195
P11387	DNA topoisomerase 1 OS=Homo sapiens GN=TOP1 PE=1 SV=2 - [TOP1_HUMAN]	40.13	30	31	109	765	90.6689	9.30518	1.00912	0.957029	0.932148	0.966099	0.971054	1.02707	1.01003	1.00272	1.0379	0.262349
E5RH51	Small integral membrane protein 12 OS=Homo sapiens GN=SMIM12 PE=1 SV=1 - [E5RH51_HUMAN]	10.81	1	1	3	74	8.67347	6.53662		0.997296	1.10717	1.05223		0.941549	0.982072	0.961811	0.914068	0.26252
B3KSM6	cDNA FLJ36606 fis, clone TRACH2015654, highly similar to HEAT SHOCK 70 kDa PROTEIN 6 OS=Homo sapiens PE=2 SV=1 - [B3KSM6_HUMAN]	20.37	1	11	121	643	70.9282	6.13818	0.922359	1.06053	1.08522	1.0227	0.931879	0.917003	0.998361	0.949081	0.928013	0.262594
A4D1E9	GTP-binding protein 10 OS=Homo sapiens GN=GTPBP10 PE=1 SV=1 - [GTPBA_HUMAN]	13.7	5	5	11	387	42.9056	9.02686	0.988991	0.947839	1.03189	0.989575	1.04763	0.98314	1.14929	1.06002	1.07119	0.262852
G3XAD2	Alpha-(1,6)-fucosyltransferase OS=Homo sapiens GN=FUT8 PE=1 SV=1 - [G3XAD2_HUMAN]	4.48	1	2	3	446	51.0721	8.35303		0.988257	1.11311	1.05068		0.977032	0.852274	0.914653	0.870533	0.263144
O75530	Polycomb protein EED OS=Homo sapiens GN=EED PE=1 SV=2 - [EED_HUMAN]	15.19	6	6	14	441	50.1656	7.03467	1.00023	0.977192	1.05258	1.01	0.968706	0.983919	0.987502	0.980043	0.970337	0.26331
Q9BX40	Protein LSM14 homolog B OS=Homo sapiens GN=LSM14B PE=1 SV=1 - [LS14B_HUMAN]	10.91	3	3	6	385	42.0453	9.68604	1.00361	1.06562	1.0549	1.04138	1.01668	1.03295	0.937287	0.995638	0.956079	0.263689
P49748	Very long-chain specific acyl-CoA dehydrogenase, mitochondrial OS=Homo sapiens GN=ACADVL PE=1 SV=1 - [ACADV_HUMAN]	42.9	9	22	87	655	70.3454	8.74854	0.933665	1.01091	1.01614	0.986906	1.08334	1.02954	0.993341	1.03541	1.04914	0.26382
Q9UK41	Vacuolar protein sorting-associated protein 28 homolog OS=Homo sapiens GN=VPS28 PE=1 SV=1 - [VPS28_HUMAN]	38.46	7	7	17	221	25.4086	5.5415	1.09609	0.98004	1.03233	1.03615	0.978092	1.01316	0.979001	0.990083	0.955538	0.263977
A0A1B0GTJ7	Adenylosuccinate lyase OS=Homo sapiens GN=ADSL PE=4 SV=1 - [A0A1B0GTJ7_HUMAN]	27.92	11	11	33	480	54.3987	7.10791	1.04542	0.915217	0.872003	0.944213	0.938474	1.06657	1.11841	1.04115	1.10266	0.264015
Q96AJ9	Vesicle transport through interaction with t-SNAREs homolog 1A OS=Homo sapiens GN=VTI1A PE=1 SV=2 - [VTI1A_HUMAN]	6.91	1	1	3	217	25.2021	6.40479	1.08713	1.05701	0.846918	0.997019	0.773816	0.941435	0.917774	0.877675	0.880299	0.264019
Q9BZQ8	Protein Niban OS=Homo sapiens GN=FAM129A PE=1 SV=1 - [NIBAN_HUMAN]	3.77	3	3	4	928	103.07	4.77979		0.969226	0.751781	0.860503		0.992599	1.26872	1.13066	1.31395	0.264038
B2R7E8	cDNA, FLJ93412, highly similar to Homo sapiens replication protein A2, 32kDa (RPA2), mRNA OS=Homo sapiens PE=2 SV=1 - [B2R7E8_HUMAN]	29.26	5	5	15	270	29.2444	6.15088	1.0059	0.970834	0.930517	0.969083	0.984993	1.00853	1.00292	0.998813	1.03068	0.264085
B2R514	cDNA, FLJ92300, Homo sapiens COP9 subunit 6 (MOV34 homolog, 34 kD) (COPS6), mRNA OS=Homo sapiens PE=2 SV=1 - [B2R514_HUMAN]	27.27	7	7	23	297	33.554	5.99854	1.03519	1.0093	1.04572	1.03007	0.94127	0.964388	1.04958	0.985081	0.956324	0.264149
Q8WXI4	Acyl-coenzyme A thioesterase 11 OS=Homo sapiens GN=ACOT11 PE=1 SV=1 - [ACO11_HUMAN]	9.56	5	5	11	607	68.4486	8.35303	0.907079	1.01131	1.05834	0.992244	1.07429	1.06272	1.02361	1.05354	1.06178	0.264304
F8VYH9	Cyclin-dependent kinase 4 (Fragment) OS=Homo sapiens GN=CDK4 PE=1 SV=1 - [F8VYH9_HUMAN]	19.41	2	3	7	170	18.6738	8.45557	0.995021	0.962843		0.978932	1.1772	1.02282		1.10001	1.12369	0.264416
Q8IXB1	DnaJ homolog subfamily C member 10 OS=Homo sapiens GN=DNAJC10 PE=1 SV=2 - [DJC10_HUMAN]	11.73	9	9	15	793	91.0213	7.18115	1.03725	1.06376	1.02633	1.04245	0.930101	0.972108	1.06461	0.988941	0.948674	0.26443
Q53SW4	Putative uncharacterized protein NDUFA10 (Fragment) OS=Homo sapiens GN=NDUFA10 PE=4 SV=1 - [Q53SW4_HUMAN]	18.92	6	6	16	333	38.1366	8.19189	0.937506	1.01525	0.781127	0.911295	1.0312	0.963906	1.01834	1.00448	1.10226	0.264491
E9PGT1	Translin OS=Homo sapiens GN=TSN PE=1 SV=1 - [E9PGT1_HUMAN]	27.35	8	8	30	223	25.5565	6.88818	1.00121	1.02099	0.858735	0.960311	0.999259	1.05541	1.03494	1.02987	1.07243	0.264732
Q53F35	Acidic (Leucine-rich) nuclear phosphoprotein 32 family, member B variant (Fragment) OS=Homo sapiens PE=2 SV=1 - [Q53F35_HUMAN]	34.4	5	11	96	250	28.6553	4.05615	1.04438	0.937252	0.922457	0.968031	0.991572	1.00972	1.10675	1.03601	1.07023	0.264877
P36871	Phosphoglucomutase-1 OS=Homo sapiens GN=PGM1 PE=1 SV=3 - [PGM1_HUMAN]	45.73	7	23	100	562	61.4105	6.75635	0.984358	0.99878	1.05113	1.01142	1.0002	0.987589	0.941627	0.97647	0.965441	0.264949
I3L1K7	Golgi SNAP receptor complex member 2 OS=Homo sapiens GN=GOSR2 PE=4 SV=1 - [I3L1K7_HUMAN]	12.59	2	2	4	143	16.7516	9.01221	0.94681	0.918234	1.02521	0.963417	0.965541	1.03475	1.0501	1.0168	1.05541	0.264997
D6R9P3	Heterogeneous nuclear ribonucleoprotein A/B OS=Homo sapiens GN=HNRNPAB PE=1 SV=1 - [D6R9P3_HUMAN]	40.71	10	12	135	280	30.284	7.91357	0.961139	1.01332	0.879818	0.951426	1.07553	0.963954	1.01111	1.01686	1.06878	0.265104
O60925	Prefoldin subunit 1 OS=Homo sapiens GN=PFDN1 PE=1 SV=2 - [PFD1_HUMAN]	28.69	4	4	9	122	14.2015	6.81494	1.02599	0.940398	0.838023	0.934803	0.953984	1.01696	1.10262	1.02452	1.09598	0.265325
A0A0G2JMG8	NACHT, LRR and PYD domains-containing protein 2 OS=Homo sapiens GN=NLRP2 PE=1 SV=1 - [A0A0G2JMG8_HUMAN]	7.51	7	7	13	1039	117.777	6.20166	0.992051	0.976507	1.12166	1.03007	0.946719	1.009	0.934877	0.963531	0.9354	0.265427
B4DH52	cDNA FLJ55916, highly similar to General transcription factor II-I OS=Homo sapiens PE=2 SV=1 - [B4DH52_HUMAN]	21.35	20	20	62	993	111.846	6.39209	1.00584	1.01212	1.13133	1.04976	1.0341	0.989733	0.925081	0.98297	0.936372	0.265617
Q96EY7	Pentatricopeptide repeat domain-containing protein 3, mitochondrial OS=Homo sapiens GN=PTCD3 PE=1 SV=3 - [PTCD3_HUMAN]	16.4	9	9	21	689	78.4997	6.41748	1.00834	1.03929	0.979582	1.00907	1.06878	0.996619	1.09083	1.05208	1.04262	0.265718
Q86U28	Iron-sulfur cluster assembly 2 homolog, mitochondrial OS=Homo sapiens GN=ISCA2 PE=1 SV=2 - [ISCA2_HUMAN]	23.38	3	3	4	154	16.4662	5.24951	0.837561	1.04654	0.995527	0.959877	1.2284	0.971514	1.06007	1.08666	1.13208	0.266022
Q9UHS8	PRO1975 OS=Homo sapiens PE=2 SV=1 - [Q9UHS8_HUMAN]	58.27	22	22	83	393	44.1187	9.02686	1.00815	1.01547	0.954927	0.992846	0.99918	1.02783	1.03818	1.02173	1.02909	0.266026
U5YKD2	MHC class I antigen (Fragment) OS=Homo sapiens GN=HLA-A PE=3 SV=1 - [U5YKD2_HUMAN]	32.64	1	8	26	337	37.9108	6.32861	0.883973	1.11378	1.14422	1.04732	1.05672	0.853599	0.779877	0.896732	0.856212	0.266164
Q96AT1	Uncharacterized protein KIAA1143 OS=Homo sapiens GN=KIAA1143 PE=1 SV=2 - [K1143_HUMAN]	12.34	2	2	7	154	17.4549	6.11279	1.09112	0.932771	1.08785	1.03725	0.95187	1.01118	0.922621	0.961892	0.927353	0.266352
O14617	AP-3 complex subunit delta-1 OS=Homo sapiens GN=AP3D1 PE=1 SV=1 - [AP3D1_HUMAN]	15.87	14	14	42	1153	130.076	8.48486	0.952705	1.03367	0.983529	0.989968	1.10304	0.980061	1.05244	1.04518	1.05577	0.266392
Q9UNS1	Protein timeless homolog OS=Homo sapiens GN=TIMELESS PE=1 SV=2 - [TIM_HUMAN]	1.41	2	2	4	1208	138.572	5.40186	1.00871	1.08321	1.59392	1.22861	0.976369	0.950623	1.03986	0.98895	0.804933	0.266647
B2R5B6	Histone H2A OS=Homo sapiens PE=2 SV=1 - [B2R5B6_HUMAN]	43.08	3	8	84	130	14.129	10.9019	0.937659	1.13905	1.30353	1.12675	1.12507	0.871757	0.851245	0.949358	0.842565	0.266979
A7BI36	p180/ribosome receptor OS=Homo sapiens GN=RRBP1 PE=2 SV=2 - [A7BI36_HUMAN]	58.96	62	63	180	1540	165.649	8.96826	0.995545	1.05149	1.03035	1.0258	1.04889	0.938922	0.926797	0.971536	0.947103	0.267136
B3KPM6	cDNA FLJ31963 fis, clone NT2RP7007610, highly similar to Homo sapiens DDHD domain containing 2 (DDHD2), mRNA OS=Homo sapiens PE=2 SV=1 - [B3KPM6_HUMAN]	5.34	3	4	5	711	80.9105	5.47803		0.968827	1.27716	1.12299		0.93822	0.780013	0.859116	0.765024	0.267235
B7ZAJ8	cDNA, FLJ79212 OS=Homo sapiens PE=2 SV=1 - [B7ZAJ8_HUMAN]	18.26	3	3	4	230	26.1722	5.65576	0.99507	0.930219	0.94988	0.95839	0.929589	1.06821	1.29234	1.09671	1.14433	0.267273
Q9NQX3	Gephyrin OS=Homo sapiens GN=GPHN PE=1 SV=1 - [GEPH_HUMAN]	12.23	7	7	17	736	79.698	5.42725	0.944003	1.01668	0.988222	0.982967	0.896177	0.965442	0.966132	0.942584	0.958917	0.267704
H3BTH1	TIMELESS-interacting protein (Fragment) OS=Homo sapiens GN=TIPIN PE=1 SV=1 - [H3BTH1_HUMAN]	6.38	1	1	2	141	16.2053	5.60498		1.02189	1.12239	1.07214		1.01416	0.941955	0.978057	0.912245	0.267748
[truncated: 3,102 more rows]

## Sheet: ACBP vs C significant analysis
Optimized ACBP VS.Control differentially expressed proteins between groups protein list.
[truncated: 4,946 more rows]

[truncated: 4 more sheets: ACBP-OXAvsCsignificant analysis, ACBPvsACBP-OXA , ACBP-OXA vs OXA, OXA vs ACBPsignificant analysis]
